# Supplementary material for: Extended defects in curved spacetimes
Source: Royal Society of Chemistry journal article supplement (doi:10.1039/d3sc02893c), 1999-01-01
Supplement: d3sc02893c1.pdf [file d3sc02893c1.pdf]

## Supplementary Information

for

### **Calculation-Assisted Regioselective Functionalization of the Imidazo[1,2-*a*]pyrazine Scaffold *via* Zinc and Magnesium Organometallic Intermediates**

Agonist Kastrati<sup>†</sup>, Alexander Kremsmair<sup>†</sup>, Alisa S. Sunagatullina, Vasilii Korotenko, Yusuf C. Guersoy, Saroj K. Rout, Fabio Lima, Cara E. Brocklehurst, Konstantin Karaghiosoff, Hendrik Zipse and Paul Knochel\*

Department Chemie  
Ludwig-Maximilians-Universität  
Butenandtstraße 5-13  
81377 München, Germany

## Table of Contents

|                                                                  |    |
|------------------------------------------------------------------|----|
| General information .....                                        | 3  |
| Typical procedures .....                                         | 7  |
| Mechanistic Investigations.....                                  | 11 |
| Products .....                                                   | 14 |
| NMR Spectra .....                                                | 45 |
| Details for X-ray data collection and structure refinement ..... | 85 |
| Theoretical Studies .....                                        | 98 |

## General information

All reactions were carried out under an argon atmosphere in flame-dried glassware. Syringes which were used to transfer anhydrous solvents or reagents were purged with argon prior to use. Yields refer to isolated yields of compounds estimated to be >95% pure as determined by  $^1\text{H-NMR}$  (25 °C) and capillary GC. All reagents were obtained from commercial sources and used without further purification unless otherwise stated. Reaction mixtures were cooled using an acetone / dry ice bath. The suspension formed during the work-up of reactions containing  $\text{CuCN}\cdot 2\text{LiCl}$  was dissolved by adding appropriate amounts of concentrated aqueous ammonia solution.

### Solvents

$\text{CH}_2\text{Cl}_2$  was predried over  $\text{P}_2\text{O}_5$  and distilled under nitrogen atmosphere.

**THF** was continuously refluxed and freshly distilled from sodium benzophenone ketyl under nitrogen and stored over molecular sieves.

All other solvents were purchased from chemical suppliers (*Merck, Acros Organics*) and used without further purification. Solvents for reaction workups and column chromatography were distilled prior to use.

### Reagents

*n***BuLi** solutions in hexane were purchased from Albemarle or Sigma Aldrich and the concentration was determined by titration against *N*-benzylbenzamide in THF at  $-40\text{ °C}$ .<sup>1</sup>

**TMPH** was purchased from Albemarle (Frankfurt, Germany), freshly distilled over  $\text{CaH}_2$  and stored under argon.

**CuCN·2LiCl** solution (1.00 M in THF) was prepared by drying CuCN (8.96 g, 100 mmol, 1.00 equiv) and LiCl (8.48 g, 200 mmol, 2.00 equiv) in a *Schlenk*-flask under vacuum for 5 h at  $150\text{ °C}$ . After cooling to  $25\text{ °C}$ , dry THF (100 mL) was added and the resulting mixture was stirred until the salts were dissolved.

---

<sup>1</sup> A. F. Burchat, J. M. Chong, N. Nielsen, *J. Organomet. Chem.* **1997**, *542*, 281-283.

**ZnCl<sub>2</sub>** solution (1.00 M in THF) was prepared by drying ZnCl<sub>2</sub> (27.3 g, 200 mmol) in a *Schlenk*-flask under vacuum for 5 h at 150 °C. After cooling to 25 °C, dry THF (200 mL) was added and the resulting mixture was stirred until the salts were dissolved.

***i*PrMgCl·LiCl**<sup>2</sup> in THF was purchased from Albemarle and used after titration against iodine (0.5 M solution in THF at 25 °C).<sup>3</sup> The reagent can also be prepared by flame drying magnesium turnings (24 g, 1.0 mol, 2.0 equiv) and anhydrous LiCl (25 g, 0.60 mol, 1.2 equiv) in a *Schlenk*-flask under vacuum at 450 °C. After the addition of anhydrous THF (500 mL), *i*PrCl (39 g, 0.50 mol, 1.0 equiv) was added dropwise at 25 °C using a dropping funnel until the reaction started. Then the reaction mixture was cooled to 0 °C and the addition was continued overnight while allowing the flask to warm up to 25 °C. The remaining solids were filtered off and the *i*PrMgCl·LiCl solution was titrated with iodine.

### Chromatography

Flash column chromatographical purifications were performed using SiO<sub>2</sub> 60 (0.040–0.063 mm, 230–400 mesh ASTM) or Florisil® PR grade (149-250 µm, 60-100 mesh) from Merck. Thin layer chromatography (TLC) was performed using aluminium plates covered with SiO<sub>2</sub> (Merck 60, F–254). Spots were visualized by UV light irradiation and/or by staining of the TLC plate with one of the reagents below, followed by heating with a heat gun if necessary.

- KMnO<sub>4</sub> (0.3 g), K<sub>2</sub>CO<sub>3</sub> (20 g) and KOH (0.3 g) in water (300 mL).
- Neat iodine absorbed on silica gel (no heating required).

### Preparative HPLC

For purification, an *Agilent Technologies* 1260 Infinity HPLC-System was used, consisting of two prep-pumps (acetonitrile/water, no additives), a MWD-detector (210 nm wavelength, 40 nm bandwidth, ref-wavelength 400 nm, ref-bandwidth 100 nm) and a fraction collector. Three different columns were used: 1) *Kinetix* EVO C18 5 µm column (length: 150 mm, diameter: 10 mm), 2) *Kinetix* EVO C18 5 µm column (length: 150 mm, diameter: 21.2 mm) and 3) *Waters* XBridge Prep C8 5 µm column (length: 150 mm, diameter: 30 mm).

### Analytical data

**NMR spectra** were recorded on *Bruker* ARX 200, AC 300, WH 400 or AMX 600 instruments. Chemical shifts are reported as δ-values in ppm relative to the deuterated solvent peak: CDCl<sub>3</sub> (δ<sub>H</sub>: 7.26; δ<sub>C</sub>: 77.16). For the observation of the observed signal multiplicities, the following

---

<sup>2</sup> A. Krasovskiy, P. Knochel, *Angew. Chem. Int. Ed.* **2004**, *43*, 3333-3336.

<sup>3</sup> A. Krasovskiy, P. Knochel, *Synthesis* **2006**, 890-891.



abbreviations and combinations thereof were used: s (singlet), d (doublet), t (triplet), q (quartet), quint (quintet), sext (sextet), sept (septet), m (multiplet) and br (broad). If not otherwise noted, the coupling constants given are either H-H or H-F coupling constants for proton signals and C-F coupling constants for carbon signals.

**Melting points** are uncorrected and were measured on a *Büchi* B.540 apparatus.

**Infrared spectra** were recorded from 4000-400  $\text{cm}^{-1}$  on a *Perkin Elmer* Spectrum BX-59343 instrument. For detection a Smiths Detection DuraSampl IR II Diamond ATR sensor was used. The main absorption peaks are reported in  $\text{cm}^{-1}$ .

**Gas chromatographical analysis (GC)** was performed with instruments of the type Hewlett-Packard 6890 or 5890 Series II, using a column of the type HP 5 (Hewlett-Packard, 5% phenylmethylpolysiloxane; length: 10 m, diameter: 0.25 mm, film thickness 0.25  $\mu\text{m}$ ). The detection was accomplished using a flame ionization detector. Mass spectra (MS) and high resolution mass spectra (HRMS) were recorded on a *Finnigan* MAT 95Q or *Finnigan* MAT 90 instrument for electron impact ionization (EI). For the combination of gas chromatography with mass spectroscopic detection, a GC-MS of the type *Hewlett-Packard* 6890/MSD 5793 networking was used (column: HP 5-MS, Hewlett-Packard; 5% phenylmethylpolysiloxane; length: 15 m, diameter: 0.25 mm, film thickness: 0.25  $\mu\text{m}$ ).

#### **TMPMgCl·LiCl (11)<sup>4</sup>**

TMPH (14.8 g, 105 mmol, 1.05 equiv) was slowly added to a solution of  $i\text{PrMgCl}\cdot\text{LiCl}$  in dry THF (1.05 M, 95 mL, 1.0 equiv). The resulting mixture was stirred under argon at 25 °C for 24 h before titrating the base against benzoic acid using 4-(phenylazo)-diphenylamine as an indicator.

#### **TMP<sub>2</sub>Zn·2MgCl<sub>2</sub>·2LiCl (12)<sup>5</sup>**

ZnCl<sub>2</sub> (1.0 M, 2.5 mL, 0.5 equiv) was slowly added to a solution of TMPMgCl·LiCl in dry THF (0.91 M, 5.49 mL, 1.0 equiv). The resulting mixture was stirred under argon at 25 °C for 30 min before titrating the base against benzoic acid using 4-(phenylazo)-diphenylamine as an indicator.

---

<sup>4</sup> A. Krasovskiy, V. Krasovskaya, P. Knochel, *Angew. Chem. Int. Ed.* **2006**, *45*, 2958-2961

<sup>5</sup> S. H. Wunderlich, P. Knochel, *Angew. Chem. Int. Ed.* **2007**, *46*, 7685-7688.

## TMPLi (19)

A dry and argon flushed Schenk-flask, equipped with a magnetic stirring bar, was charged with TMPH (1.3 mL, 10.0 mmol, 1.0 equiv) and dry THF (10 mL). The reaction mixture was cooled to  $-40\text{ }^{\circ}\text{C}$  and *n*-BuLi (1.6 M, 6.3 mL, 10 mmol, 1.0 equiv) was added dropwise. The reaction mixture was stirred at  $-40\text{ }^{\circ}\text{C}$  for 30 min until a milky white solution was formed. The concentration was determined by titration of an aliquot with benzoic acid.

## Typical procedures

### TP1: Typical procedure for the metalation of 6-chloroimidazo[1,2-*a*]pyrazine in position 3 using TMPMgCl·LiCl

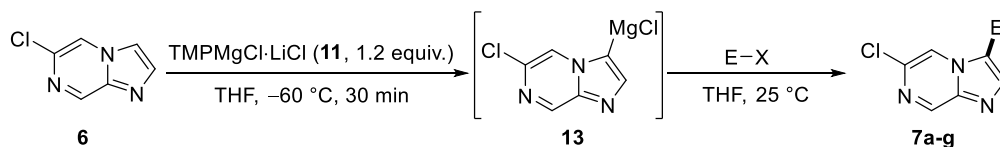

Freshly prepared TMPMgCl·LiCl (**11**, 1.2 equiv.) was added dropwise to a cooled (-60 °C) solution of 6-chloroimidazo[1,2-*a*]pyrazine (**6**, 30.7 mg, 0.2 mmol, 1.0 equiv) in dry THF (1 mL) and stirred for 30 min. Subsequently, the electrophile (1.5 equiv) was added, the cooling bath removed, and the temperature was allowed to rise to room temperature. The reaction mixture was continued stirring at room temperature, was quenched with saturated aqueous NH<sub>4</sub>Cl solution and extracted with EtOAc (3 x 20 mL). The collected organic layers were dried over MgSO<sub>4</sub> and concentrated under reduced pressure. The crude product was purified by flash chromatography using silica gel (stationary phase) and the appropriate solvent mixture *i*-hexane/EtOAc.

### TP2: Typical procedure for the metalation of 6-chloroimidazo[1,2-*a*]pyrazine in position 5 using (TMP)<sub>2</sub>Zn·2MgCl<sub>2</sub>·2LiCl

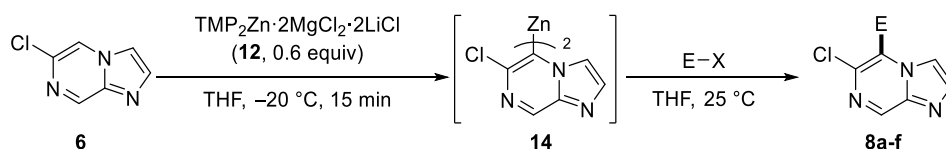

Freshly prepared (TMP)<sub>2</sub>Zn·2MgCl<sub>2</sub>·2LiCl (**12**, 0.6 equiv, 0.12 mmol) was added dropwise to a cooled (-20 °C) solution of 6-chloroimidazo[1,2-*a*]pyrazine (**6**, 1.0 equiv, 0.2 mmol) in dry THF (1 mL) and stirred for 15 min. Subsequently, the electrophile (1.5 equiv) was added, the cooling bath was removed, and the temperature was allowed to rise to room temperature. The reaction mixture was continued stirring at room temperature, was quenched with saturated aqueous NH<sub>4</sub>Cl solution and extracted with EtOAc (3 x 20 mL). The collected organic layers were dried over MgSO<sub>4</sub> and concentrated under reduced pressure. The crude product was purified by flash chromatography using silica gel (stationary phase) and the appropriate solvent mixture *i*-hexane/EtOAc.

**TP3: Typical procedure for the second metalation in position 2 using  $\text{TMP}_2\text{Zn}\cdot 2\text{MgCl}_2\cdot 2\text{LiCl}$**

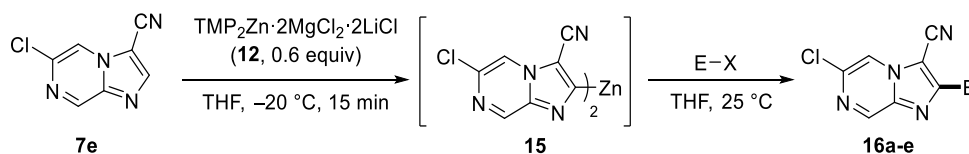

Freshly prepared  $\text{TMP}_2\text{Zn}\cdot 2\text{MgCl}_2\cdot 2\text{LiCl}$  (**12**, 0.6 equiv, 0.12 mmol) was added dropwise to a cooled ( $-20\text{ }^\circ\text{C}$ ) solution of 6-chloroimidazo[1,2-a]pyrazine-3-carbonitrile (**7e**, 35.7 mg, 0.2 mmol, 1.0 equiv) in dry THF (1 mL) and stirred for 15 min. Subsequently, the electrophile (1.5 equiv) was added, the cooling bath was removed, and the temperature was allowed to rise to room temperature. The reaction mixture was continued stirring at room temperature, was quenched with saturated aqueous  $\text{NH}_4\text{Cl}$  solution and extracted with EtOAc (3 x 20 mL). The collected organic layers were dried over  $\text{MgSO}_4$  and concentrated under reduced pressure. The crude product was purified by flash chromatography using silica gel (stationary phase) and the appropriate solvent mixture *i*-hexane/EtOAc.

**TP4: Typical procedure for the third metalation in position 8 using  $\text{TMPMgCl}\cdot\text{LiCl}$**

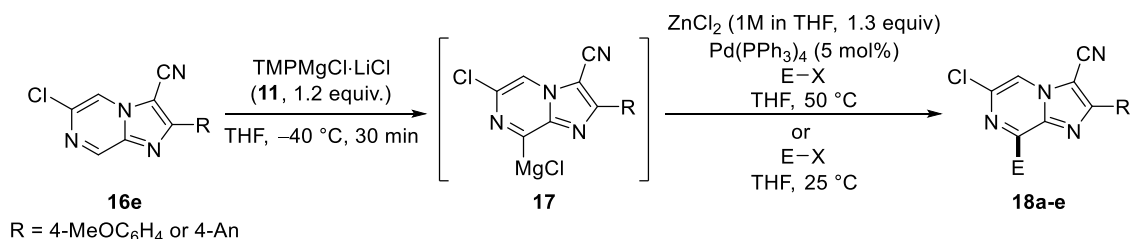

Freshly prepared  $\text{TMPMgCl}\cdot\text{LiCl}$  (**11**, 0.24 mmol, 1.2 equiv) was added dropwise to a cooled ( $-40\text{ }^\circ\text{C}$ ) solution of 6-chloro-2-(4-methoxyphenyl)imidazo[1,2-a]pyrazine-3-carbonitrile (**16e**, 56.9 mg, 0.2 mmol, 1.0 equiv) in dry THF (2 mL) and stirred for 30 min. Subsequently the electrophile (1.5 equiv) was added, the cooling bath was removed, and the temperature was allowed to rise to room temperature. The reaction mixture was continued stirring at room temperature. In case,  $\text{ZnCl}_2$  solution (1 M, 1.3 equiv) was added and the reaction mixture was stirred for additional 15 min at the same temperature ( $-40\text{ }^\circ\text{C}$ ) for transmetalation. The obtained zinc reagent was subsequently added dropwise into a separate reaction flask containing the catalyst (5 mol%) and electrophile (0.8 equiv) and stirred for 2 h at  $50\text{ }^\circ\text{C}$ . The reaction mixture was quenched with saturated aqueous  $\text{NH}_4\text{Cl}$  solution and extracted with EtOAc (3 x 20 mL). The collected organic layers were dried over  $\text{MgSO}_4$  and concentrated under reduced pressure. The crude product was purified by flash chromatography using silica gel (stationary phase) and the appropriate solvent mixture *i*-hexane/EtOAc.

### TP5: Typical procedure for the fourth metalation in position 5 using TMPLi

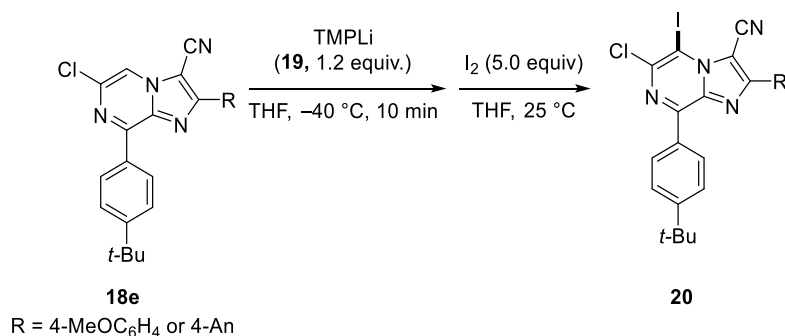

Freshly prepared TMPLi (**19**, 1.2 equiv, 0.12 mmol) was added dropwise to a cooled (-40 °C) solution of 8-(4-(*tert*-butyl)phenyl)-6-chloro-2-(4-methoxyphenyl)imidazo[1,2-*a*]pyrazine-3-carbonitrile **18e** (41.6 mg, 0.1 mmol, 1 equiv) in dry THF (1 mL) and stirred for 10 min. Subsequently, iodine (127 mg, 0.5 mmol, 5.0 equiv) was added, and stirring continued for 5 min at the same temperature followed by additional 10 min at room temperature. Then, the mixture was quenched with saturated aqueous Na<sub>2</sub>S<sub>2</sub>O<sub>3</sub> solution and extracted with EtOAc (3 x 20 mL). The collected organic layers were dried over MgSO<sub>4</sub> and concentrated under reduced pressure. The crude product was purified by flash chromatography using silica gel (stationary phase) and the appropriate solvent mixture *i*-hexane/EtOAc.

### TP6: Typical procedure for the Pd-catalyzed cross-coupling of **6** with organozinc reagents

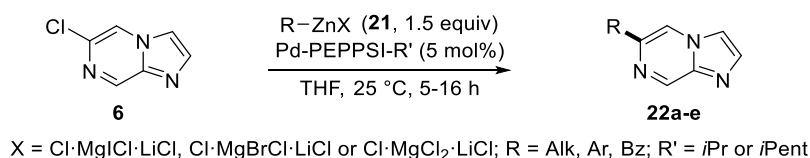

A solution of a zinc reagent of type **21**<sup>6</sup> (in THF, 0.75 mmol, 1.5 equiv) was added dropwise to a solution of 6-chloroimidazo[1,2-*a*]pyrazine (**6**, 76.8 mg, 0.5 mmol, 1.0 equiv) and Pd-PEPPSI-*i*Pr (5 mol%, 17.0 mg) or Pd-PEPPSI-*i*Pent (5 mol%, 19.8 mg) in THF (1.0 mL). The resulting reaction mixture was stirred at 25 °C for 5 h (in the case of Pd-PEPPSI-*i*Pr) or at 25 °C for 16 h (in the case of Pd-PEPPSI-*i*Pent) under argon. Then, the mixture was quenched with saturated aqueous NH<sub>4</sub>Cl solution and extracted with EtOAc (3 x 15 mL). The collected organic layers were dried over MgSO<sub>4</sub> and concentrated under reduced pressure. The crude

<sup>6</sup> a) A. Krasovskiy, P. Knochel, *Angew. Chem. Int. Ed.* **2004**, *43*, 3333-3336; *Angew. Chem.* **2004**, *116*, 3396-3399; b) A. Metzger, F. M. Piller, P. Knochel, *Chem. Commun.* **2008**, 5824-5826; c) V. Dhayalan, P. Knochel, *Synthesis* **2015**, 3246-3256; d) F. H. Lutter, L. Grokenberger, P. Spieß, J. M. Hammann, K. Karaghiosoff, P. Knochel, *Angew. Chem. Int. Ed.* **2020**, *59*, 5546-5550; *Angew. Chem.* **2020**, *132*, 5591-5595.

product was purified by flash chromatography using silica gel (stationary phase) and the appropriate solvent mixture *i*-hexane/EtOAc.

#### TP7: Typical procedure for the Suzuki–Miyaura cross coupling

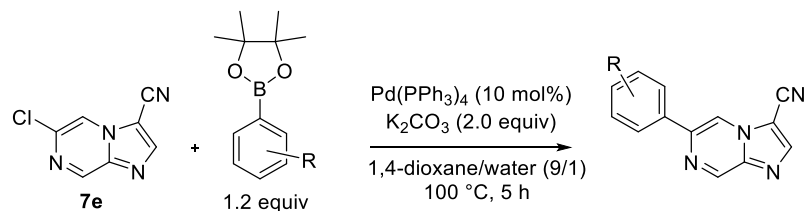

A solution of 6-chloroimidazo[1,2-*a*]pyrazine-3-carbonitrile (**7e**, 71.4 mg, 0.4 mmol, 1.0 equiv), arylboronic acid pinacol ester (0.48 mmol, 1.2 equiv), Pd(PPh<sub>3</sub>)<sub>4</sub> (46 mg, 0.04 mmol, 10 mol%) and K<sub>2</sub>CO<sub>3</sub> (110 mg, 0.8 mmol, 2.0 equiv) in (1,4-dioxane/water (9/1), 1.3 mL) was purged with argon for 5 min. The resulting reaction mixture was stirred at 100 °C for 5 h in a closed system. Then, the mixture was quenched with saturated aqueous NH<sub>4</sub>Cl solution and extracted with EtOAc (3 x 30 mL). The collected organic layers were dried over MgSO<sub>4</sub> and concentrated under reduced pressure. The crude product was purified by flash chromatography using silica gel (stationary phase) and the appropriate solvent mixture *i*-hexane/EtOAc.

#### TP8: Typical procedure for the nucleophilic addition of Grignard reagents to **6**

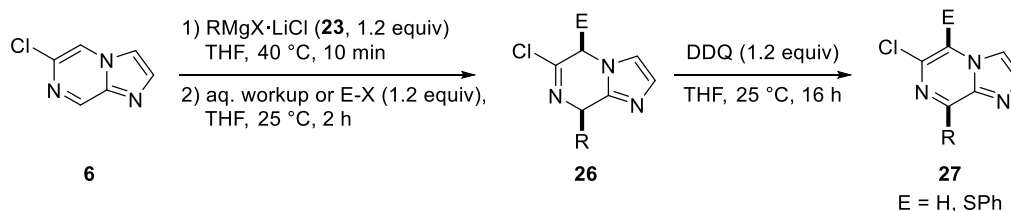

To a solution of 6-chloroimidazo[1,2-*a*]pyrazine (**6**, 76.8 mg, 0.5 mmol, 1.0 equiv) in THF (0.5 M) the corresponding organomagnesium reagent RMgX·LiCl (**23**, 1.2 equiv) was added at 40 °C. The mixture was stirred at 40 °C for 10 min. Then, the mixture was quenched with saturated aqueous NH<sub>4</sub>Cl solution and extracted with EtOAc (3 x 20 mL; or the mixture was added to the solution of corresponding electrophile in THF and stirred at 25 °C for 2 h, then worked-up as usual, see **27f**). The collected organic layers were washed with brine, dried over MgSO<sub>4</sub> and concentrated *in vacuo*.

The resulting reaction mixture was dissolved in THF (1 mL, 0.5 M). Then, DDQ (36.0 mg, 0.6 mmol, 1.2 equiv) was added, and the reaction mixture was stirred at 25 °C for 16 h. The reaction mixture was quenched with saturated aqueous NH<sub>4</sub>Cl solution and extracted with EtOAc (3 x 30 mL), dried over MgSO<sub>4</sub>, concentrated *in vacuo* and purified *via* silica gel column chromatography to yield the desired 8-substituted 6-chloroimidazo[1,2-*a*]pyrazine of type **27**.

# Mechanistic Investigations

## Metalation of Imidazo[1,2-a]pyrazine (3)

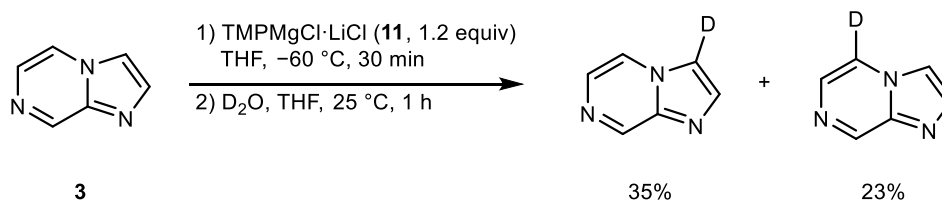

Freshly prepared TMPMgCl·LiCl (**11**, 1.2 equiv.) was added dropwise to a cooled (-60 °C) solution of imidazo[1,2-a]pyrazine (59.5 mg, 0.5 mmol, 1.0 equiv) in dry THF (2.5 mL) and stirred for 30 min. Subsequently, D<sub>2</sub>O (100 μL, 100 mg, 10 equiv) was added, the cooling bath was removed, and the temperature was allowed to rise to room temperature in 1 h. The reaction mixture then was diluted with Et<sub>2</sub>O (10 mL), dried over MgSO<sub>4</sub>, concentrated under reduced pressure and submitted for <sup>1</sup>H NMR to determine the regioselectivity of metalation.

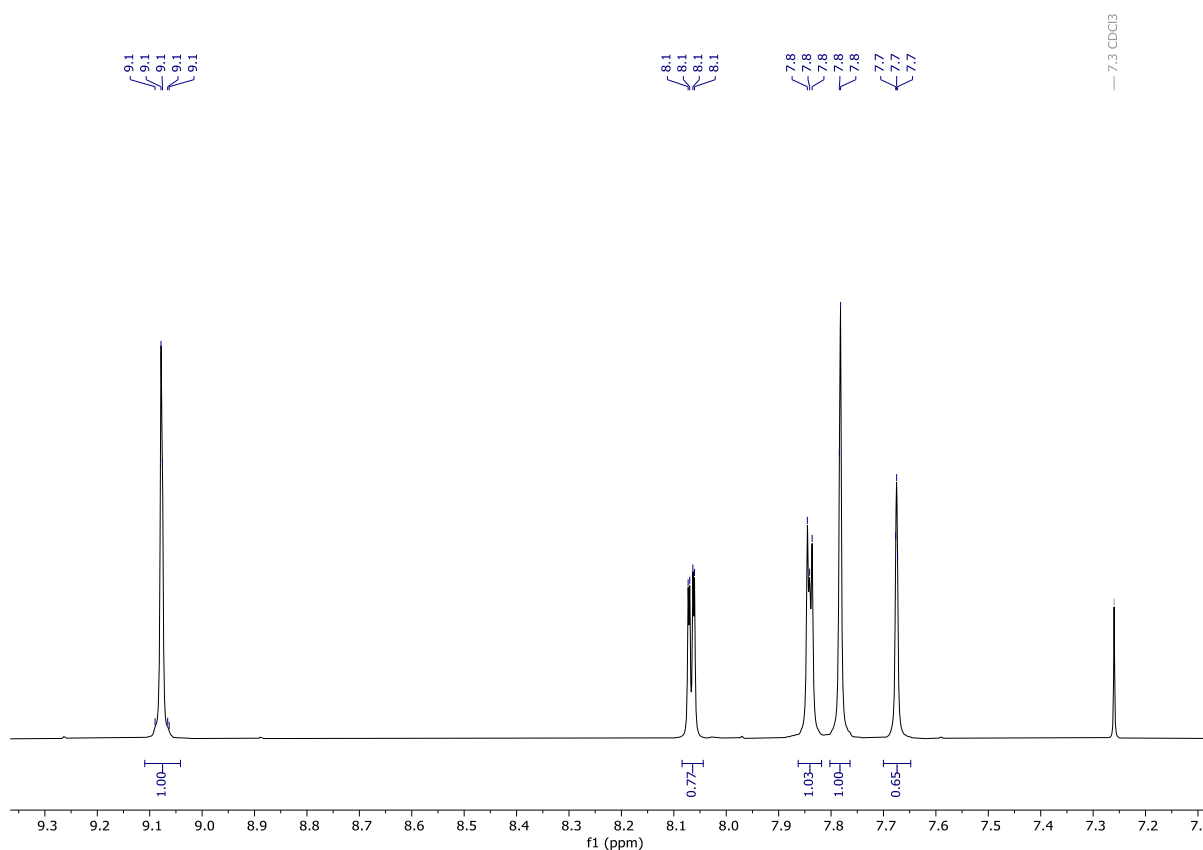

## Kinetic Isotope Effect Study (Intermolecular Competition Experiment)

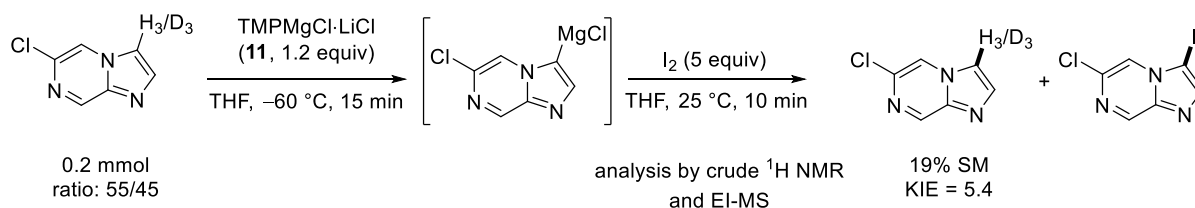

Freshly prepared TMPMgCl·LiCl (**11**, 1.2 equiv.) was added dropwise to a cooled ( $-60\text{ }^\circ\text{C}$ ) solution of  $h_3/d_3$ -6-chloroimidazo[1,2-*a*]pyrazine (ratio  $h_3/d_3$  55:45; 31.2 mg, 0.2 mmol, 1.0 equiv) in dry THF (1 mL) and stirred for 15 min. Subsequently,  $\text{I}_2$  (254 mg, 5 equiv) was added, the cooling bath removed, and the temperature was allowed to rise to room temperature in 10 min. The reaction mixture then was quenched with saturated aqueous  $\text{NH}_4\text{Cl}$  solution and extracted with EtOAc (3 x 4 mL). The collected organic layers were dried over  $\text{MgSO}_4$  and concentrated under reduced pressure. The conversion was determined by  $^1\text{H}$  NMR and a sample was submitted to EI-MS analysis to determine the isotopic distribution.



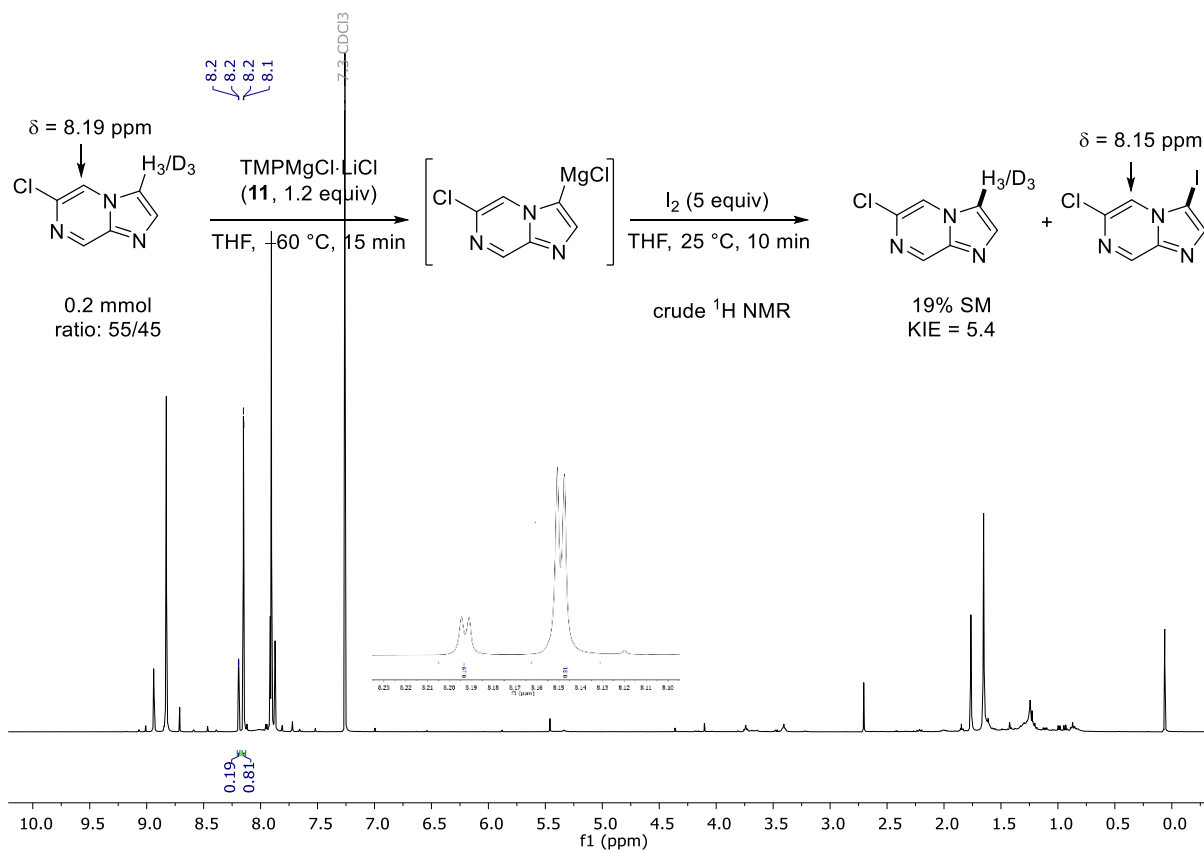

03-alsuch-1427#1768 RT: 8.19 AV: 1 NL: 1.61E7  
T: FTMS + p EI Full ms [40.0000-750.0000]

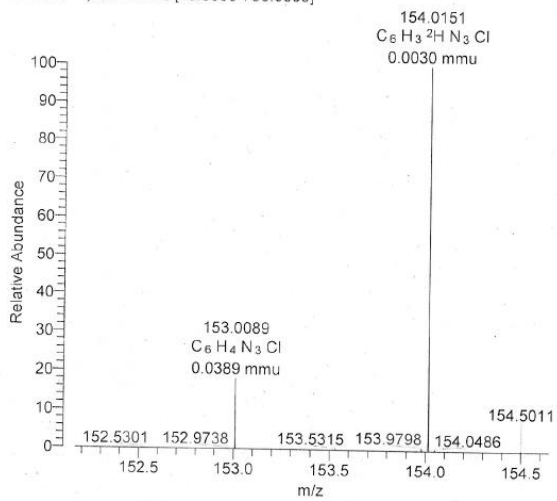

03-alsuch-1427#1768 RT: 8.19  
T: FTMS + p EI Full ms [40.0000-750 ...]  
m/z= 153-154

| m/z      | Intensity  | Relative |
|----------|------------|----------|
| 152.9738 | 17530.5    | 0.11     |
| 153.0089 | 2950438.0  | 18.35    |
| 153.0424 | 8334.9     | 0.05     |
| 153.0695 | 7857.9     | 0.05     |
| 153.0912 | 30439.7    | 0.19     |
| 153.4897 | 6346.2     | 0.04     |
| 153.5315 | 46529.1    | 0.29     |
| 153.9798 | 102632.1   | 0.64     |
| 154.0151 | 16077318.0 | 100.00   |
| 154.0486 | 54718.1    | 0.34     |
| 154.0525 | 39721.3    | 0.25     |

## Products

### 6-Chloro-3-iodoimidazo[1,2-*a*]pyrazine (**7a**)

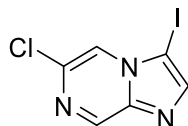

6-Chloro-3-iodoimidazo[1,2-*a*]pyrazine (**7a**) was prepared according to **TP1** on a 0.2 mmol scale using iodine (5 equiv, 1.0 mmol, 253 mg) as electrophile (10 min, 25 °C). Purified by flash chromatography using *i*-hexane/EtOAc (3/2, v/v) to afford desired compound **7a** as a white solid (0.15 mmol, 43.4 mg, 78%).

**<sup>1</sup>H NMR** (400 MHz, CDCl<sub>3</sub>) δ = 8.83 (d, *J* = 1.2, 1H), 8.15 (d, *J* = 1.2, 1H), 7.91 (s, 1H).

**<sup>13</sup>C NMR** (101 MHz, CDCl<sub>3</sub>) δ = 143.6, 142.9, 142.3, 136.3, 117.0, 65.2.

**HRMS (EI)**: calculated for C<sub>6</sub>H<sub>3</sub>ClIN<sub>3</sub><sup>+</sup>: 278.9055, found 278.9055 [M]<sup>+</sup>.

**MS (70 eV, EI) m/z (%)**: 281 (32), 279 (100), 253 (10), 127 (96), 42 (17).

**IR (ATR)  $\tilde{\nu}$  (cm<sup>-1</sup>)**: 3109, 3014, 1602, 1483, 1433, 1399, 1316, 1284, 1260, 1219, 1144, 1074, 971, 954, 910, 880, 868, 824, 812, 805, 738.

**Mp**: 174.6–175.7 °C.

### 3-Allyl-6-chloroimidazo[1,2-*a*]pyrazine (**7b**)

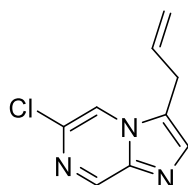

3-Allyl-6-chloroimidazo[1,2-*a*]pyrazine (**7b**) was prepared according to **TP1** on a 0.2 mmol scale using allyl bromide (1.2 equiv, 0.24 mmol, 0.02 mL) as electrophile and CuCN·2LiCl (50 mol%, 0.1 mmol, 0.1 mL) as catalyst (25 °C, 1.5 h). Purified by flash chromatography using *i*-hexane/EtOAc (1/1 then 1/4 v/v) to afford desired compound **7b** as a white solid (0.11 mmol, 22 mg, 56%).

**<sup>1</sup>H NMR** (400 MHz, CDCl<sub>3</sub>) δ = 8.88 (d, *J* = .4, 1H), 7.94 (d, *J* = 1.3, 1H), 7.68 (s, 1H), 5.99–5.85 (m, 1H), 5.26 (dq, *J* = 10.0, 1.4, 1H), 5.13 (dq, *J* = 17.0, 1.6, 1H), 3.66 (dt, *J* = 6.1, 1.7, 2H).

**<sup>13</sup>C NMR** (101 MHz, CDCl<sub>3</sub>) δ = 142.4, 140.3, 136.2, 134.7, 131.3, 124.4, 118.8, 114.4, 28.1.

**HRMS (EI)**: calculated for C<sub>9</sub>H<sub>8</sub>ClN<sub>3</sub><sup>+</sup>: 193.0401, found 193.0401 [M]<sup>+</sup>.

**MS (70 eV, EI) m/z (%)**: 194 (16), 193 (20), 192 (51), 168 (19), 166 (62), 158 (100), 157 (24), 156 (24), 113 (12), 86 (11), 44 (11), 42 (16).

**IR (ATR)  $\tilde{\nu}$  (cm<sup>-1</sup>)**: 3036, 1644, 1608, 1516, 1485, 1466, 1432, 1349, 1329, 1306, 1233, 1148, 1110, 1099, 1024, 995, 934, 912, 901, 871, 858, 828, 760, 718.

**Mp**: 69.9–70.8 °C.

#### 1-(6-Chloroimidazo[1,2-*a*]pyrazin-3-yl)-2,2-dimethylpropan-1-one (**7c**)

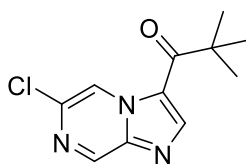

1-(6-Chloroimidazo[1,2-*a*]pyrazin-3-yl)-2,2-dimethylpropan-1-on (**7c**) was prepared according to **TP1** on a 0.2 mmol scale using PivCl (1.5 equiv, 0.3 mmol, 0.037 mL) as electrophile and CuCN·2LiCl (50 mol%, 0.1 mmol, 0.1 mL) as catalyst (25 °C, 2 h). Purified by flash chromatography using *i*-hexane/EtOAc (3/2 v/v) to afford desired compound **7c** as a white solid (0.08 mmol, 19 mg, 40%).

**<sup>1</sup>H NMR** (400 MHz, CDCl<sub>3</sub>) δ = 9.73–9.69 (m, 1H), 9.09–9.04 (m, 1H), 8.55 (s, 1H), 1.45 (s, 9H).

**<sup>13</sup>C NMR** (101 MHz, CDCl<sub>3</sub>) δ = 197.8, 143.2, 142.3, 140.9, 138.0, 122.6, 119.7, 44.6, 28.3.

**HRMS (EI)**: calculated for C<sub>11</sub>H<sub>12</sub>ClN<sub>3</sub>O<sup>+</sup>: 237.0663, found 237.0662 [M]<sup>+</sup>.

**MS (70 eV, EI) m/z (%)**: 237 (9), 182 (33), 181 (25), 180 (100), 153 (28), 44 (12), 42 (15).

**IR (ATR)  $\tilde{\nu}$  (cm<sup>-1</sup>)**: 3141, 3123, 2977, 2360, 1858, 1702, 1632, 1598, 1495, 1475, 1448, 1396, 1367, 1314, 1278, 1241, 1182, 1144, 1119, 1050, 1020, 932, 918, 908, 853, 810, 735.

**Mp:** 149.8–151.8 °C.

**(6-Chloroimidazo[1,2-*a*]pyrazin-3-yl)(3-chlorophenyl)methanone (7d)**

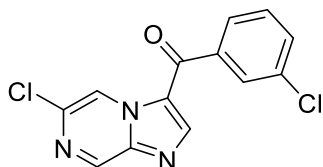

Compound **7d** was prepared according to **TP1** on a 0.4 mmol scale using *m*-chlorobenzoyl chloride (1.5 equiv, 0.6 mmol, 0.076 mL) as electrophile (25 °C, 2 h) and CuCN·2LiCl (20 mol%, 0.08 mmol, 0.08 mL) as catalyst. Purified by flash chromatography using *i*-hexane/EtOAc (7/3 v/v) to afford desired compound **7d** as a light-yellow solid (0.29 mmol, 64 mg, 56%).

**<sup>1</sup>H NMR** (400 MHz, CDCl<sub>3</sub>) δ = 9.62 (d, *J* = 1.4, 1H), 9.14 (d, *J* = 1.4, 1H), 8.34 (s, 1H), 7.86 (t, *J* = 1.9, 1H), 7.76 (dt, *J* = 7.6, 1.4, 1H), 7.63 (ddd, *J* = 8.1, 2.1, 1.1, 1H), 7.52 (t, *J* = 7.9, 1H).

**<sup>13</sup>C NMR** (101 MHz, CDCl<sub>3</sub>) δ = 183.7, 145.7, 142.7, 139.6, 138.3, 135.4, 133.2, 130.4, 129.0, 127.1, 119.3.

**HRMS (EI):** calculated for C<sub>13</sub>H<sub>7</sub>Cl<sub>2</sub>N<sub>3</sub>O<sup>+</sup>: 290.9961, found 290.9961 [M]<sup>+</sup>.

**MS (70 eV, EI) m/z (%):** 293 (29), 291 (47), 290 (18), 256 (34), 207 (23), 182 (30), 180 (100), 139 (33), 111 (20), 73 (16).

**IR (ATR)  $\tilde{\nu}$  (cm<sup>-1</sup>):** 1619, 1603, 1563, 1494, 1448, 1416, 1341, 1315, 1215, 1180, 1126, 1047, 913, 898, 857, 809, 768, 743, 722, 691, 660.

**Mp:** 191.3–192.2 °C.

**6-Chloroimidazo[1,2-*a*]pyrazine-3-carbonitrile (7e)**

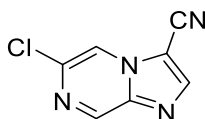

Compound **7e** was prepared according to **TP1** on a 0.2 mmol scale using TsCN (1.5 equiv, 0.3 mmol, 54.36 mg) as electrophile (25 °C, 2 h). Purified by flash chromatography using *i*-

hexane/EtOAc (3/2, v/v) to afford desired compound **7e** as a white solid (0.14 mmol, 25 mg, 70%).

**Note:** The reaction was also performed on gram scale. According to TP1 compound **6** (5 g, 32.6 mmol, 1.0 equiv) was treated with TMPMgCl·LiCl (39.1 mmol, 1.2 equiv) and TsCN (8.8 g, 48.9 mmol, 1.5 equiv). Compound **7e** was isolated in 52% yield.

**<sup>1</sup>H NMR** (400 MHz, CDCl<sub>3</sub>) δ = 9.09 (d, *J*=1.4, 1H), 8.42 (d, *J*=1.3, 1H), 8.30 (s, 1H).

**<sup>13</sup>C NMR** (101 MHz, CDCl<sub>3</sub>) δ = 143.8, 143.2, 140.7, 137.8, 116.8, 109.2, 100.2.

**HRMS (EI):** calculated for C<sub>7</sub>H<sub>3</sub>CIN<sub>4</sub><sup>++</sup>: 178.0041, found 178.0041 [M]<sup>++</sup>.

**MS (70 eV, EI) m/z (%):** 180 (32), 178 (100), 143 (11), 42 (12).

**IR (ATR)  $\tilde{\nu}$  (cm<sup>-1</sup>):** 3124, 3102, 3078, 3038, 2228, 1794, 1694, 1604, 1490, 1460, 1413, 1327, 1315, 1304, 1282, 1234, 1168, 1137, 1115, 1032, 914, 900, 849, 816, 753.

**Mp:** 169.9–171.6 °C.

#### Ethyl 6-chloroimidazo[1,2-*a*]pyrazine-3-carboxylate (**7f**)

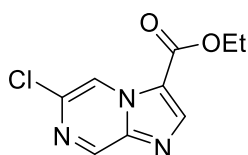

Compound **7f** was prepared according to **TP1** on a 0.2 mmol scale using ethyl cyanofornate (1.5 equiv, 0.3 mmol, 0.03 mL) as electrophile (25 °C, 2 h). Purified by flash chromatography using *i*-hexane/EtOAc (3/2, v/v) to afford desired compound **7f** as a white solid (0.097 mmol, 22 mg, 48%).

**<sup>1</sup>H NMR** (400 MHz, CDCl<sub>3</sub>) δ = 9.25 (d, *J* = 1.4, 1H), 9.03 (d, *J* = 1.4 Hz, 1H), 8.38 (s, 1H), 4.46 (q, *J* = 7.1, 2H), 1.44 (t, *J* = 7.1, 3H).

**<sup>13</sup>C NMR** (101 MHz, CDCl<sub>3</sub>) δ = 159.9, 142.7, 142.5, 141.8, 137.2, 118.5, 117.7, 61.6, 14.5.

**HRMS (EI):** calculated for C<sub>9</sub>H<sub>8</sub>CIN<sub>3</sub>O<sub>2</sub><sup>++</sup>: 225.0300, found 225.0299 [M]<sup>++</sup>.

**MS (70 eV, EI) m/z (%):** 253 (16), 251 (10), 225 (30), 199 (19), 197 (59), 190 (17), 182 (32), 180 (100), 155 (12), 153 (39), 42 (29).

**IR (ATR)  $\tilde{\nu}$  (cm<sup>-1</sup>):** 3093, 3039, 3012, 2979, 2360, 1882, 1700, 1602, 1504, 1454, 1419, 1388, 1368, 1341, 1302, 1286, 1248, 1206, 1150, 1126, 1095, 1031, 944, 914, 894, 876, 859, 767, 752, 737.

**Mp:** 124.6–126.5 °C.

**6-Chloro-3-(phenylthio)imidazo[1,2-*a*]pyrazine (7g)**

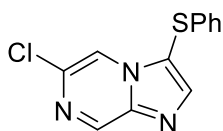

Compound **7g** was prepared according to **TP1** on a 0.4 mmol scale using PhSO<sub>2</sub>SPh (1.2 equiv, 0.48 mmol, 120 mg) as electrophile (25 °C, 2 h). Purified by flash chromatography using *i*-hexane/EtOAc (7/3, v/v) to afford desired compound **7g** as a white solid (0.26 mmol, 68 mg, 65%).

**<sup>1</sup>H NMR** (400 MHz, CDCl<sub>3</sub>)  $\delta$  = 9.03 (d, *J* = 1.4 Hz, 1H), 8.26 (d, *J* = 1.4 Hz, 1H), 8.18 (s, 1H), 7.37–7.22 (m, 4H), 7.15–7.06 (m, 2H).

**<sup>13</sup>C NMR** (101 MHz, CDCl<sub>3</sub>)  $\delta$  = 144.7, 142.6, 142.1, 136.1, 133.1, 129.8, 127.3, 127.3, 115.4, 115.1.

**HRMS (EI):** calculated for C<sub>12</sub>H<sub>18</sub>ClN<sub>3</sub>S<sup>+</sup>: 261.0122, found 261.0121 [M]<sup>+</sup>.

**MS (70 eV, EI) m/z (%):** 261 (8), 226 (99), 140 (13), 122 (9), 121 (100), 112 (20), 85 (11).

**IR (ATR)  $\tilde{\nu}$  (cm<sup>-1</sup>):** 3057, 3103, 3015, 1597, 1577, 1479, 1461, 1438, 1402, 1313, 1285, 1221, 1150, 1128, 1088, 1079, 1021, 998, 948, 908, 889, 821, 806, 742, 730, 684.

**Mp:** 78.1–78.9 °C.

**6-Chloro-5-iodoimidazo[1,2-*a*]pyrazine (8a)**

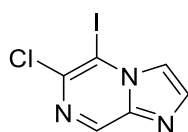

Compound **8a** was prepared according to **TP2** on a 0.2 mmol scale using iodine (5 equiv, 1.0 mmol, 253 mg) as electrophile. Purified by flash chromatography using *i*-hexane/EtOAc (3/2, v/v) to afford desired compound **8a** as a white solid (0.11 mmol, 30.6 mg, 55%).

<sup>1</sup>H NMR (400 MHz, DMSO-*d*<sub>6</sub>) δ = 8.91 (s, 1H), 8.26 (s, 1H), 7.98 (d, *J* = 1.2, 1H).

<sup>13</sup>C NMR (101 MHz, DMSO-*d*<sub>6</sub>) δ = 140.1, 139.8, 138.4, 136.5, 121.0, 89.5.

HRMS (EI): calculated for C<sub>6</sub>H<sub>3</sub>ClIN<sub>3</sub><sup>+</sup>: 278.9055, found 278.9049 [M]<sup>+</sup>.

MS (70 eV, EI) *m/z* (%): 278 (100), 281 (30), 152 (28), 125 (11).

IR (ATR)  $\tilde{\nu}$  (cm<sup>-1</sup>): 3147, 3110, 1741, 1578, 1469, 1437, 1313, 1294, 1217, 1148, 1134, 1110, 1076, 940, 919, 899, 872, 850.

Mp: 228.5–230.2 °C.

#### 5-Allyl-6-chloroimidazo[1,2-*a*]pyrazine (**8b**)

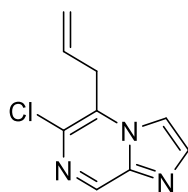

Compound **8b** was prepared according to **TP2** on a 0.2 mmol scale using allyl bromide (1.2 equiv, 0.24 mmol, 0.02 mL) as electrophile and CuCN·2LiCl (20 mol%, 0.1 mmol, 0.04 mL) as catalyst. Purified by flash chromatography using *i*-hexane/EtOAc (7/3) to afford desired compound **8b** as an off-white solid (0.17 mmol, 33 mg, 85%).

<sup>1</sup>H NMR (400 MHz, CDCl<sub>3</sub>) δ = 8.86 (s, 1H), 7.86 (s, 1H), 7.70 (s, 1H), 5.88 (ddt, *J* = 16.4, 10.2, 6.0, 1H), 5.33–5.11 (m, 2H), 3.90 (dt, *J* = 6.0, 1.8, 2H).

<sup>13</sup>C NMR (101 MHz, CDCl<sub>3</sub>) δ = 140.6, 140.4, 137.3, 133.7, 128.8, 126.5, 119.3, 112.8, 33.8.

HRMS (EI): calculated for C<sub>9</sub>H<sub>8</sub>ClIN<sub>3</sub><sup>+</sup>: 193.0328, found 192.0327 [M-H]<sup>+</sup>.

MS (70 eV, EI) *m/z* (%): 192 (12), 61 (14), 44 (14), 43 (100).

**IR (ATR)  $\tilde{\nu}$  (cm<sup>-1</sup>):** 3146, 3090, 3044, 3017, 2917, 1863, 1809, 1642, 1605, 1502, 1473, 1446, 1428, 1310, 1244, 1204, 1131, 1032, 994, 963, 937, 909, 851, 764, 750, 723.

**Mp:** 124.1–125.4 °C.

**1-(6-Chloroimidazo[1,2-a]pyrazin-5-yl)-2,2-dimethylpropan-1-one (8c)**

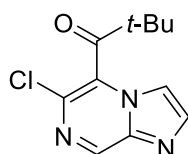

Compound **8c** was prepared according to **TP2** on a 0.3 mmol scale using pivaloyl chloride (1.5 equiv, 0.45 mmol, 54 mg) as electrophile and CuCN·2LiCl (20 mol%, 0.06 mmol, 0.06 mL) as catalyst (25 °C, 2 h). Purified by flash chromatography using *i*-hexane/EtOAc (7/3) to afford desired compound **8c** as an off-white solid (0.18 mmol, 43 mg, 60%).

**<sup>1</sup>H NMR** (600 MHz, CDCl<sub>3</sub>)  $\delta$  = 8.92 (d, *J* = 1.0 Hz, 1H), 7.88 (d, *J* = 1.3 Hz, 1H), 7.44–7.39 (m, 1H), 1.38 (d, *J* = 1.8 Hz, 9H).

**<sup>13</sup>C NMR** (151 MHz, CDCl<sub>3</sub>)  $\delta$  = 205.3, 142.3, 140.0, 137.8, 129.7, 126.4, 113.6, 46.1, 27.5.

**HRMS (EI):** calculated for C<sub>11</sub>H<sub>12</sub>ClN<sub>3</sub>O<sup>+</sup>: 237.0663, found 237.0660 [M]<sup>+</sup>.

**MS (70 eV, EI) m/z (%):** 237 (10), 152 (33), 61 (13), 57 (51), 44 (13), 42 (100), 40 (19).

**IR (ATR)  $\tilde{\nu}$  (cm<sup>-1</sup>):** 3110, 2970, 2908, 1690, 1598, 1471, 1444, 1310, 1126, 1108, 1069, 937, 929, 912, 870, 757, 745, 706.

**Mp:** 103.7–104.5 °C.

**(6-Chloroimidazo[1,2-a]pyrazin-5-yl)(3-chlorophenyl)methanone (8d)**



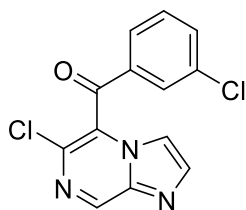

Compound **8d** was prepared according to **TP2** on a 0.4 mmol scale using *m*-chlorobenzoyl chloride (1.5 equiv, 0.6 mmol, 0.076 mL) as electrophile and CuCN·2LiCl (20 mol%, 0.08 mmol, 0.08 mL) as catalyst (25 °C, 2 h). Purified by flash chromatography using DCM/EtOAc (4/1 v/v) to afford desired compound **8d** as a yellow solid (0.20 mmol, 61 mg, 52%).

**<sup>1</sup>H NMR** (400 MHz, CDCl<sub>3</sub>) δ = 9.04 (s, 1H), 7.90 (t, *J* = 1.9, 2H), 7.78–7.70 (m, 2H), 7.67 (ddd, *J* = 8.0, 2.2, 1.1, 1H), 7.48 (t, *J* = 7.9, 1H).

**<sup>13</sup>C NMR** (101 MHz, CDCl<sub>3</sub>) δ = 187.1, 143.8, 140.2, 138.2, 136.5, 136.0, 135.4, 133.6, 130.8, 129.5, 128.0, 123.4, 114.8.

**HRMS (EI)**: calculated for C<sub>13</sub>H<sub>7</sub>Cl<sub>2</sub>N<sub>3</sub>O<sup>+</sup>: 290.9961, found 290.9957 [M]<sup>+</sup>.

**MS (70 eV, EI) m/z (%)**: 291 (17), 264 (17), 262 (26), 141 (32), 139 (17), 139 (100), 111 (30).

**IR (ATR)  $\tilde{\nu}$  (cm<sup>-1</sup>)**: 3181, 3066, 1649, 1589, 1567, 1464, 1442, 1419, 1351, 1317, 1277, 1262, 1207, 1160, 1120, 1049, 946, 905, 886, 851, 799, 772, 758, 714, 678.

**Mp**: 156.2–157.8 °C.

#### Ethyl 4-(6-chloroimidazo[1,2-*a*]pyrazin-5-yl)benzoate (**8e**)

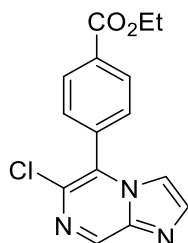

Compound **8e** was prepared according to **TP2** on a 0.3 mmol scale using 4-iodobenzoate (66 mg, 0.24 mmol, 0.8 equiv) as electrophile and Pd(PPh<sub>3</sub>)<sub>4</sub> (5 mol%, 0.12 mmol, 14 mg) as catalyst (40 °C, 2 h). Purified by flash chromatography using *i*-hexane/EtOAc (3/2) to afford desired compound **8e** as an off-white solid (0.16 mmol, 48 mg, 53%).

**<sup>1</sup>H NMR** (400 MHz, CDCl<sub>3</sub>) δ = 8.95 (d, *J* = 0.8 Hz, 1H), 8.31–8.26 (m, 2H), 7.80 (d, *J* = 1.1 Hz, 1H), 7.68–7.62 (m, 2H), 7.38 (t, *J* = 0.9 Hz, 1H), 4.44 (q, *J* = 7.1 Hz, 2H), 1.43 (t, *J* = 7.1 Hz, 3H).

**<sup>13</sup>C NMR** (101 MHz, CDCl<sub>3</sub>) δ = 165.7, 141.7, 140.6, 137.3, 134.2, 133.3, 132.7, 130.9, 127.4, 113.6, 61.7, 14.5.

**HRMS (EI)**: calculated for C<sub>15</sub>H<sub>12</sub>ClN<sub>3</sub>O<sub>2</sub><sup>+</sup>: 301.0613, found 301.0615 [M]<sup>+</sup>.

**MS (70 eV, EI) m/z (%)**: 303 (31), 302 (18), 301 (100), 273 (27), 258 (17), 257 (10), 256 (50), 228 (11), 193 (15), 165 (10).

**IR (ATR)  $\tilde{\nu}$  (cm<sup>-1</sup>)**: 3148, 3095, 2992, 1707, 1610, 1468, 1443, 1365, 1296, 1281, 1254, 1178, 1129, 1113, 1021, 950, 920, 864, 849, 774, 740, 701.

**Mp**: 127.8–128.6 °C.

#### 6-Chloro-5-(4-methoxyphenyl)imidazo[1,2-*a*]pyrazine (**8f**)

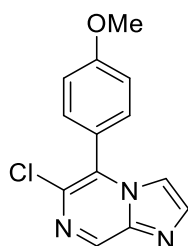

Compound **8f** was prepared according to **TP2** on a 0.3 mmol scale using 4-iodoanisole (56 mg, 0.24 mmol, 0.8 equiv) as electrophile and Pd(PPh<sub>3</sub>)<sub>4</sub> (5 mol%, 0.12 mmol, 14 mg) as catalyst (40 °C, 2 h). Purified by flash chromatography using *i*-hexane/EtOAc (1/1 v/v) to afford desired compound **8f** as an off-white solid (0.19 mmol, 50 mg, 64%).

**<sup>1</sup>H NMR** (400 MHz, CDCl<sub>3</sub>) δ = 8.90 (s, 1H), 7.77 (d, *J* = 1.2 Hz, 1H), 7.53–7.40 (m, 3H), 7.17–7.07 (m, 2H), 3.91 (s, 3H).

**<sup>13</sup>C NMR** (101 MHz, CDCl<sub>3</sub>) δ = 161.2, 140.9, 140.8, 137.0, 133.3, 130.9, 128.3, 122.1, 115.0, 113.8, 55.6.

**HRMS (EI)**: calculated for C<sub>13</sub>H<sub>10</sub>ClN<sub>3</sub>O<sup>+</sup>: 259.0507, found 259.0544[M]<sup>+</sup>.

**MS (70 eV, EI) m/z (%):** 259 (45), 216 (8), 61 (15), 43 (100).

**IR (ATR)  $\tilde{\nu}$  (cm<sup>-1</sup>):** 3043, 2969, 2937, 1610, 1483, 1463, 1441, 1305, 1296, 1251, 1176, 1145, 1117, 1108, 1027, 952, 926, 874, 830, 812, 761, 749, 719, 673.

**Mp:** 199.4–200.2 °C.

### 6-Chloro-5-(3,4,5-trimethoxyphenyl)imidazo[1,2-a]pyrazine (**8g**)

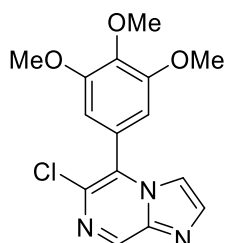

Compound **8g** was prepared according to **TP2** on a 0.3 mmol scale using 5-iodo-1,2,3-trimethoxybenzene (71 mg, 0.24 mmol, 0.8 equiv) as electrophile and Pd(PPh<sub>3</sub>)<sub>4</sub> (5 mol%, 0.12 mmol, 14 mg) as catalyst (40 °C, 2 h). Purified by flash chromatography using *i*-hexane/EtOAc (1/4 v/v) to afford desired compound **8g** as an off-white solid (0.13 mmol, 42 mg, 54%).

**<sup>1</sup>H NMR** (400 MHz, CDCl<sub>3</sub>)  $\delta$  = 8.91 (s, 1H), 7.79 (d, *J* = 1.1 Hz, 1H), 7.49 (s, 1H), 6.73 (s, 2H), 3.96 (s, 3H), 3.88 (s, 6H).

**<sup>13</sup>C NMR** (101 MHz, CDCl<sub>3</sub>)  $\delta$  = 154.3, 141.2, 140.7, 139.7, 137.1, 133.1, 128.3, 125.2, 114.0, 106.3, 61.2, 56.5.

**HRMS (EI):** calculated for C<sub>15</sub>H<sub>14</sub>ClN<sub>3</sub>O<sub>3</sub><sup>+</sup>: 319.0718, found 319.0717 [M]<sup>+</sup>.

**MS (70 eV, EI) m/z (%):** 321(32), 320 (17), 319 (100), 306 (10), 304 (28), 261 (13), 218 (22), 190 (11), 144 (12).

**IR (ATR)  $\tilde{\nu}$  (cm<sup>-1</sup>):** 3146, 3128, 2940, 2840, 1548, 1489, 1467, 1449, 1415, 1374, 1325, 1314, 1301, 1234, 1123, 1094, 1012, 993, 930, 910, 891, 850, 837, 812, 771, 746, 727, 691.

**Mp:** 194.4–195.2 °C.

### 6-Chloro-2-iodoimidazo[1,2-*a*]pyrazine-3-carbonitrile (**16a**)

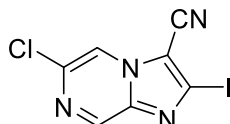

Compound **16a** was prepared according to **TP3** on a 0.2 mmol scale using iodine (3 equiv, 0.6 mmol, 152.26 mg) as electrophile (25 °C, 10 min). Purified by flash chromatography using *i*-hexane/EtOAc (7/3 v/v) to afford desired compound **16a** as a white solid (0.10 mmol, 32 mg, 52%).

**<sup>1</sup>H NMR** (400 MHz, DMSO-*d*<sub>6</sub>)  $\delta$  = 9.15 (d, *J*=1.3, 1H), 9.12 (d, *J*=1.3, 1H).

**<sup>13</sup>C NMR** (101 MHz, DMSO-*d*<sub>6</sub>)  $\delta$  = 142.2, 141.2, 135.9, 118.9, 110.4, 107.6, 106.4.

**HRMS (EI):** calculated for C<sub>7</sub>H<sub>2</sub>ClIN<sub>4</sub><sup>+</sup>: 303.9007, found 303.9008 [M]<sup>+</sup>.

**MS (70 eV, EI) m/z (%):** 306 (29), 303 (100), 113 (28), 86 (12), 43 (10).

**IR (ATR)  $\tilde{\nu}$  (cm<sup>-1</sup>):** 3087, 3025, 2227, 1703, 1604, 1454, 1410, 1318, 1308, 1278, 1217, 1184, 1135, 1046, 940, 855, 758.

**Mp:** 244.6–246.3 °C.

### 2-Allyl-6-chloroimidazo[1,2-*a*]pyrazine-3-carbonitrile (**16b**)

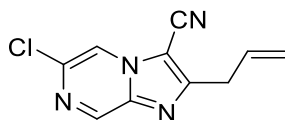

Compound **16b** was prepared according to **TP3** on a 0.2 mmol scale using allyl bromide (1.5 equiv, 0.3 mmol, 0.026 mL) as electrophile and CuCN·2LiCl (20 mol%, 0.04 mmol, 0.04 mL) as catalyst (25 °C, 1 h). Purified by flash chromatography using *i*-hexane/EtOAc (7/3 v/v) to afford desired compound **16b** as an off-white solid (0.1 mmol, 22 mg, 50%).

**<sup>1</sup>H NMR** (400 MHz, CDCl<sub>3</sub>) δ = 8.97 (s, 1H), 8.34–8.29 (m, 1H), 6.12–5.97 (m, 1H), 5.35–5.23 (m, 2H), 3.74 (d, *J* = 6.7 Hz, 2H).

**<sup>13</sup>C NMR** (101 MHz, CDCl<sub>3</sub>) δ = 157.5, 142.1, 140.1, 137.3, 132.1, 119.2, 116.6, 109.6, 98.2, 33.5.

**HRMS (EI)**: calculated for C<sub>10</sub>H<sub>7</sub>CIN<sub>4</sub><sup>+</sup>: 218.0354, found 218.0349 [M]<sup>+</sup>.

**MS (70 eV, EI) m/z (%)**: 219 (32), 218 (26), 217 (100), 194 (11), 192 (33).

**IR (ATR)  $\tilde{\nu}$  (cm<sup>-1</sup>)**: 3093, 3035, 3007, 2223, 1642, 1603, 1491, 1482, 1466, 1425, 1414, 1389, 1293, 1271, 1248, 1195, 1161, 1063, 995, 979, 956, 931, 857, 759, 964.

**Mp**: 117.5–118.7 °C.

### 6-Chloro-2-pivaloylimidazo[1,2-*a*]pyrazine-3-carbonitrile (**16c**)

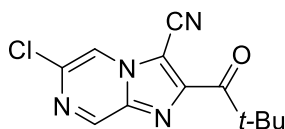

Compound **16c** was prepared according to **TP3** on a 1.7 mmol scale using PivCl (1.5 equiv, 2.65 mmol, 0.324 mL) as electrophile and CuCN·2LiCl (50 mol%, 0.88 mmol, 0.88 mL) as catalyst (25 °C, 1 h). Purified by flash chromatography using *i*-hexane/EtOAc (4/1 v/v) to afford desired compound **16c** as an off-white solid (0.28 mmol, 74 mg, 33%).

**<sup>1</sup>H NMR** (400 MHz, CDCl<sub>3</sub>) δ = 9.14 (s, 1H), 8.43 (s, 1H), 1.47 (s, 9H).

**<sup>13</sup>C NMR** (101 MHz, CDCl<sub>3</sub>) δ = 199.9, 150.3, 144.7, 138.9, 138.6, 116.7, 109.2, 102.0, 44.6, 26.6.

**HRMS (EI)**: calculated for C<sub>12</sub>H<sub>11</sub>CIN<sub>4</sub>O<sup>+</sup>: 262.0616, found 262.0616 [M]<sup>+</sup>.

**MS (70 eV, EI) m/z (%)**: 262 (8), 205 (15), 177 (26), 57 (100), 42 (18), 40 (35).

**IR (ATR)  $\tilde{\nu}$  (cm<sup>-1</sup>)**: 3112, 2957, 2932, 2872, 2226, 1680, 1600, 1494, 1472, 1458, 1420, 1390, 1377, 1299, 1278, 1246, 1173, 1077, 999, 937, 922, 828, 760, 701.

**Mp**: 169.3–171.7 °C.

### Ethyl 4-(6-chloro-3-cyanoimidazo[1,2-a]pyrazin-2-yl)benzoate (**16d**)

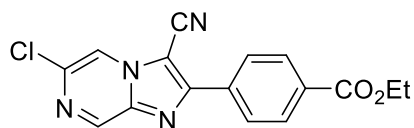

Compound **16d** was prepared according to **TP3** on a 0.2 mmol scale using ethyl-4-iodobenzoate (1.5 equiv, 0.3 mmol, 82.8 mg) as electrophile and Pd(PPh<sub>3</sub>)<sub>4</sub> (5 mol%, 11.5 mg) as catalyst (50 °C, 2 h). Purified by flash chromatography using *i*-hexane/EtOAc (4/1 v/v) to afford desired compound **16d** as a white solid (0.11 mmol, 36 mg, 55%).

**<sup>1</sup>H NMR** (400 MHz, CDCl<sub>3</sub>) δ = 9.08 (d, *J* = 1.4, 1H), 8.41 (d, *J* = 1.4, 1H), 8.28 (d, *J* = 8.7 Hz, 2H), 8.22 (d, *J* = 8.7 Hz, 2H), 4.43 (q, *J* = 7.1, 2H), 1.43 (t, *J* = 7.1, 3H).

**<sup>13</sup>C NMR** (101 MHz, CDCl<sub>3</sub>) δ = 165.9, 153.6, 142.8, 140.4, 137.8, 134.0, 132.8, 130.6, 127.6, 116.7, 110.6, 61.6, 14.5.

**HRMS (EI)**: calculated for C<sub>16</sub>H<sub>11</sub>ClN<sub>4</sub>O<sub>2</sub><sup>+</sup>: 326.0565, found 326.0562 [M]<sup>+</sup>.

**MS (70 eV, EI) m/z (%)**: 326 (27), 300 (22), 298 (73), 283 (32), 281 (100), 255 (16), 253 (52), 207 (52), 191 (16), 114 (22).

**IR (ATR)  $\tilde{\nu}$  (cm<sup>-1</sup>)**: 3049, 2218, 1701, 1598, 1569, 1467, 1409, 1372, 1306, 1277, 1247, 1225, 1178, 1132, 1110, 1035, 1015, 942, 926, 866, 850, 782, 758, 714.

**Mp**: 280.9–282.3 °C.

### 6-Chloro-2-(4-methoxyphenyl)imidazo[1,2-a]pyrazine-3-carbonitrile (**16e**)

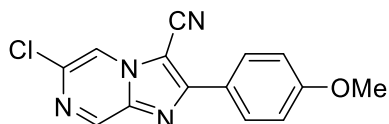

Compound **16e** was prepared according to **TP3** on a 0.2 mmol scale using 4-iodoanisole (1.5 equiv, 0.3 mmol, 70.2 mg) as electrophile and Pd(PPh<sub>3</sub>)<sub>4</sub> (5 mol%, 11.5 mg) as catalyst (50 °C, 2 h). Purified by flash chromatography using *i*-hexane/EtOAc (4/1 to 1/1, v/v) to afford desired compound **16e** as a white solid (0.14 mmol, 40.9 mg, 72%).

**<sup>1</sup>H NMR** (400 MHz, CDCl<sub>3</sub>) δ = 8.99 (d, *J* = 1.4, 1H), 8.35 (d, *J* = 1.3, 1H), 8.15 (d, *J* = 8.9, 2H), 7.05 (d, *J* = 8.9, 2H), 3.90 (s, 3H).

**<sup>13</sup>C NMR** (101 MHz, CDCl<sub>3</sub>) δ = 162.1, 154.9, 142.0, 140.4, 137.1, 129.3, 122.7, 116.6, 114.8, 111.3, 94.8, 55.6.

**HRMS (EI):** calculated for C<sub>14</sub>H<sub>9</sub>ClN<sub>4</sub>O<sup>+</sup>: 284.0459, found 284.0457 [M]<sup>+</sup>.

**MS (70 eV, EI) m/z (%):** 286 (32), 284 (100), 269 (37), 243 (15), 241 (51), 207 (15).

**IR (ATR)  $\tilde{\nu}$  (cm<sup>-1</sup>):** 3114, 3011, 2848, 2216, 1611, 1576, 1537, 1474, 1460, 1449, 142, 1389, 1315, 1295, 1259, 1222, 1184, 1123, 1104, 1095, 1040, 1022, 946, 850, 826, 818, 798, 758, 740, 698, 686, 664.

**Mp:** 228.0–229.3 °C.

#### 6-Chloro-8-iodo-2-(4-methoxyphenyl)imidazo[1,2-*a*]pyrazine-3-carbonitrile (**18a**)

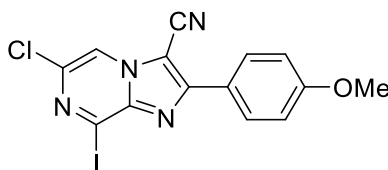

Compound **18a** was prepared according to **TP4** on a 0.2 mmol scale using iodine (5 equiv, 1.0 mmol, 253 mg) as electrophile (25 °C, 10 min). Purified by flash chromatography using *i*-hexane/EtOAc (4/1, v/v) to afford desired compound **18a** as a white solid (0.13 mmol, 55.7 mg, 68%).

**<sup>1</sup>H NMR** (400 MHz, CDCl<sub>3</sub>) δ = 8.24 (s, 1H), 8.17 (d, *J* = 8.9, 2H), 7.03 (d, *J* = 8.9, 2H), 3.89 (s, 3H).

**<sup>13</sup>C NMR** (101 MHz, CDCl<sub>3</sub>) δ = 162.2, 154.4, 141.0, 135.4, 129.5, 122.3, 116.0, 114.7, 111.2, 110.9, 96.7, 55.6.

**HRMS (EI):** calculated for C<sub>14</sub>H<sub>8</sub>ClIN<sub>4</sub>O<sup>+</sup>: 409.9426, found 409.9420 [M]<sup>+</sup>.

**MS (70 eV, EI) m/z (%):** 412 (36), 411 (17), 409 (100), 284 (16), 57 (11).

**IR (ATR)  $\tilde{\nu}$  (cm<sup>-1</sup>):** 3085, 2229, 1608, 1573, 1536, 1476, 1452, 1423, 1383, 1312, 1292, 1259, 1181, 1120, 1107, 1066, 1023, 958, 843, 812, 784, 739, 697, 686.

**Mp:** 228.3–229.7 °C.

**6-Chloro-2-(4-methoxyphenyl)-8-(methylthio)imidazo[1,2-a]pyrazine-3-carbonitrile (18b)**

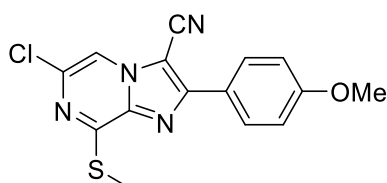

Compound **18b** was prepared according to **TP4** on a 0.2 mmol scale using PhSO<sub>2</sub>SCH<sub>3</sub> (1.5 equiv, 0.3 mmol, 56.5 mg) as electrophile (25 °C, 3 h). Purified by flash chromatography using *i*-hexane/EtOAc (7/3, v/v) to afford desired compound **18b** as a white solid (0.078 mmol, 25.8 mg, 39%).

**<sup>1</sup>H NMR** (400 MHz, CDCl<sub>3</sub>) δ = 8.18–8.10 (m, 2H), 7.99 (s, 1H), 7.05–6.97 (m, 2H), 3.88 (s, 3H), 2.71 (s, 3H).

**<sup>13</sup>C NMR** (101 MHz, CDCl<sub>3</sub>) δ = 161.8, 154.9, 153.3, 138.1, 136.2, 129.2, 122.9, 114.6, 111.5, 95.2, 55.6, 21.0, 12.8.

**HRMS (EI):** calculated for C<sub>15</sub>H<sub>11</sub>ClN<sub>4</sub>OS<sup>+</sup>: 330.0337, found 303.0334 [M]<sup>+</sup>.

**MS (70 eV, EI) m/z (%):** 332 (34), 331 (15), 330 (100), 329 (19), 297 (38), 284 (28), 269 (19), 224 (29), 209 (15).

**IR (ATR)  $\tilde{\nu}$  (cm<sup>-1</sup>):** 2213, 1604, 1574, 1535, 1475, 1451, 1422, 1382, 1329, 1306, 1290, 1257, 1242, 1178, 1118, 1082, 1023, 964, 889, 844, 805, 785.

**Mp:** 230.1–231.9 °C.

**Ethyl 4-(6-chloro-3-cyano-2-(4-methoxyphenyl)imidazo[1,2-a]pyrazin-8-yl)benzoate (18c)**



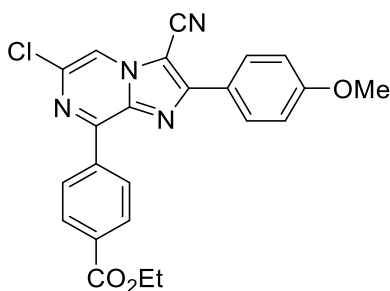

Compound **18c** was prepared according to **TP4** on a 0.1 mmol scale using 4-iodobenzoate (1.5 equiv, 0.15 mmol, 41.4 mg) as electrophile and Pd(PPh<sub>3</sub>)<sub>4</sub> (5 mol%, 5.7 mg) as catalyst (50 °C, 2 h). Purified by flash chromatography using *i*-hexane/CH<sub>2</sub>Cl<sub>2</sub> (1/4, v/v) to afford desired compound **18c** as a yellow solid (0.045 mmol, 19.9 mg, 46%).

**<sup>1</sup>H NMR** (400 MHz, CDCl<sub>3</sub>) δ = 8.96–8.89 (m, 2H), 8.28 (s, 1H), 8.25–8.15 (m, 4H), 7.09–7.00 (m, 2H), 4.44 (q, *J* = 7.1, 2H), 3.90 (s, 3H), 1.45 (t, *J* = 7.1, 3H).

**<sup>13</sup>C NMR** (101 MHz, CDCl<sub>3</sub>) δ = 166.2, 162.0, 154.1, 147.1, 139.0, 137.7, 136.3, 133.0, 130.1, 129.8, 129.3, 122.7, 115.4, 114.7, 111.5, 94.8, 61.5, 55.6, 14.5.

**HRMS (EI)**: calculated for C<sub>23</sub>H<sub>17</sub>ClN<sub>4</sub>O<sub>3</sub><sup>+</sup>: 432.0984, found 432.0984 [M]<sup>+</sup>.

**MS (70 eV, EI) m/z (%)**: 434 (32), 433 (25), 432 (100), 404 (24), 387 (37), 316 (29), 315 (19), 247 (15), 114 (27).

**IR (ATR) ν̄ (cm<sup>-1</sup>)**: 2956, 2902, 2220, 1714, 1611, 1576, 1483, 1446, 1418, 1391, 1341, 1309, 1274, 1253, 1184, 1125, 1109, 1097, 1018, 964, 888, 868, 841, 802, 795, 784, 754, 740, 695.

**Mp**: 211.0–212.5 °C.

#### 6-Chloro-2,8-bis(4-methoxyphenyl)imidazo[1,2-*a*]pyrazine-3-carbonitrile (**18d**)

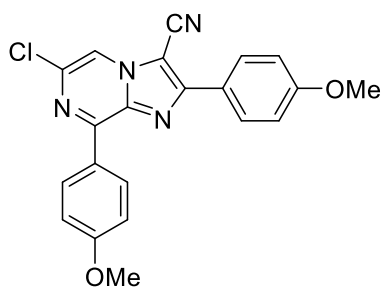

Compound **18d** was prepared according to **TP4** on a 0.1 mmol scale using 4-iodoanisole (1.5 equiv, 0.15 mmol, 35.1 mg) as electrophile and Pd(PPh<sub>3</sub>)<sub>4</sub> (5 mol%, 5.7 mg) as catalyst

(50 °C, 2 h). Purified by flash chromatography using *i*-hexane/EtOAc (4/1, v/v) to afford desired compound **18d** as a white solid (0.06 mmol, 24.2 mg, 62%).

**<sup>1</sup>H NMR** (400 MHz, CDCl<sub>3</sub>) δ = 8.94–8.87 (m, 2H), 8.26–8.18 (m, 3H), 7.12–7.02 (m, 4H), 3.93 (s, 3H), 3.91 (s, 3H).

**<sup>13</sup>C NMR** (101 MHz, CDCl<sub>3</sub>) δ = 162.8, 161.8, 153.6, 148.1, 138.8, 136.4, 132.2, 129.3, 126.7, 123.1, 114.7, 114.2, 113.8, 111.8, 94.6, 55.6.

**HRMS (EI)**: calculated for C<sub>21</sub>H<sub>15</sub>ClN<sub>4</sub>O<sub>2</sub><sup>++</sup>: 390.0878, found 390.0876 [M]<sup>++</sup>.

**MS (70 eV, EI) m/z (%)**: 392 (37), 391 (23), 390 (100), 233 (16), 221 (24).

**IR (ATR)  $\tilde{\nu}$  (cm<sup>-1</sup>)**: 3088, 2960, 2835, 2213, 1601, 1575, 1515, 1477, 1460, 1420, 1388, 1346, 1307, 1256, 1174, 1163, 1098, 1021, 964, 848, 842, 796, 738, 694.

**Mp**: 192.7–194.2 °C.

**8-(4-(*tert*-Butyl)phenyl)-6-chloro-2-(4-methoxyphenyl)imidazo[1,2-*a*]pyrazine-3-carbonitrile (18e)**

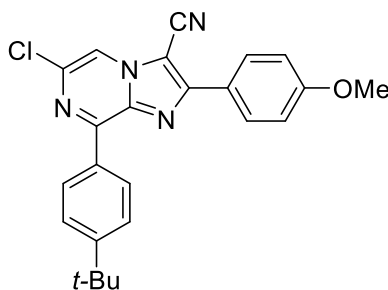

Compound **18e** was prepared according to **TP4** on a 0.1 mmol scale using 4-*tert*-butyliodobenzene (1.5 equiv, 0.15 mmol, 0.026 mL) as electrophile and Pd(PPh<sub>3</sub>)<sub>4</sub> (5 mol%, 5.7 mg) as catalyst (50 °C, 1 h). Purified by flash chromatography using *i*-hexane/EtOAc (9/1, v/v) to afford desired compound **18e** as a white solid (0.069 mmol, 28.8 mg, 69%).

**<sup>1</sup>H NMR** (400 MHz, CDCl<sub>3</sub>) δ = 8.80–8.72 (m, 2H), 8.26–8.17 (m, 3H), 7.64–7.56 (m, 2H), 7.04 (d, *J* = 8.9, 2H), 3.90 (s, 3H), 1.40 (s, 9H).

**<sup>13</sup>C NMR** (101 MHz, CDCl<sub>3</sub>) δ = 161.8, 155.5, 153.7, 148.6, 138.9, 136.4, 131.2, 130.0, 129.2, 125.8, 123.1, 114.6, 114.3, 111.8, 94.6, 55.6, 35.2, 31.3.

**HRMS (EI):** calculated for C<sub>24</sub>H<sub>21</sub>ClN<sub>4</sub>O<sup>+</sup>: 416.1398, found 416.1403 [M]<sup>+</sup>.

**MS (70 eV, EI) m/z (%):** 416 (46), 403 (30), 402 (23), 401 (100), 186 (27), 114 (17).

**IR (ATR)  $\tilde{\nu}$  (cm<sup>-1</sup>):** 2952, 2904, 2835, 2213, 1614, 1576, 1478, 1462, 1419, 1389, 1341, 1306, 1248, 1177, 1123, 1093, 1035, 1014, 966, 890, 849, 831, 790, 738, 708, 690.

**Mp:** 197.1–198.4 °C.

**8-(4-(*tert*-Butyl)phenyl)-6-chloro-5-iodo-2-(4-methoxyphenyl)imidazo[1,2-a]pyrazine-3-carbonitrile (20)**

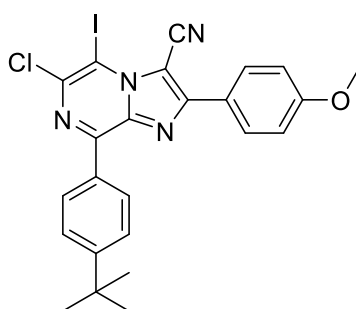

Compound **20** was prepared according to **TP5** on a 0.1 mmol scale using iodine (5 equiv, 0.5 mmol, 127 mg) as electrophile (25 °C, 10 min). Purified by flash chromatography using *n*-Hexane/EtOAc (10/0 to 9/1, v/v) to afford desired compound **20** as a yellow solid (0.04 mmol, 21.7 mg, 40%).

**<sup>1</sup>H NMR** (400 MHz, CDCl<sub>3</sub>)  $\delta$  = 8.68 (d, *J*=8.6, 2H), 8.23 (d, *J*=8.9, 2H), 7.59 (d, *J*=8.6, 2H), 7.06 (d, *J*=8.9, 2H), 3.90 (s, 3H), 1.39 (s, 9H).

**<sup>13</sup>C NMR** (201 MHz, CDCl<sub>3</sub>)  $\delta$  = 161.8, 156.0, 155.5, 147.4, 144.3, 139.4, 130.7, 130.2, 130.1, 129.9, 129.9, 125.8, 123.0, 114.5, 113.2, 82.0, 55.6, 35.2, 31.3.

**HRMS (EI):** calculated for C<sub>24</sub>H<sub>20</sub>ClIN<sub>4</sub>O<sup>+</sup>: 542.0365, found 542.0370 [M]<sup>+</sup>.

**MS (70 eV, EI) m/z (%):** 544 (29), 543 (22), 542 (87), 529 (32), 528 (23), 527 (100), 403 (20), 402 (16), 401 (57).

**IR (ATR)  $\tilde{\nu}$  (cm<sup>-1</sup>):** 2963, 2361, 2208, 1739, 1608, 1471, 1410, 1348, 1310, 1257, 1175, 1111, 1031, 954, 846, 836, 798, 740, 710, 696.

**Mp:** 270.3–272.0 °C.

### Ethyl 4-(imidazo[1,2-a]pyrazin-6-yl)benzoate (**22a**)

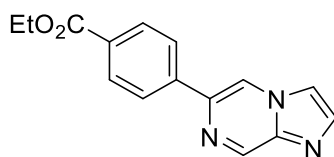

Ethyl 4-iodobenzoate (0.8 mL, 5 mmol, 1.0 equiv) was dissolved in THF (5 mL) and cooled to  $-20\text{ }^{\circ}\text{C}$ . Then, a solution of *i*PrMgCl·LiCl (1.2M in THF, 5.25 mmol, 1.05 equiv) was added dropwise at this temperature and the mixture was stirred at  $-20\text{ }^{\circ}\text{C}$  for 30 min. The organometallic species was then let warm to room temperature and titrated against iodine.

Next, according to **TP6, 6** (76.8 mg, 0.5 mmol, 1 equiv) and Pd-PEPPSI-*i*Pr (5 mol%, 17.0 mg) were dissolved in THF (1.0 mL). Then, the freshly prepared zinc reagent (1.5 equiv, 0.75 mmol) was added dropwise. The resulting reaction mixture was stirred at  $25\text{ }^{\circ}\text{C}$  for 5 h. The reaction mixture was quenched with saturated aqueous  $\text{NH}_4\text{Cl}$  solution and extracted with EtOAc (3 x 15 mL). The collected organic layers were dried over  $\text{MgSO}_4$  and concentrated under reduced pressure. The crude product was purified by flash chromatography using silica gel and *i*-hexane/EtOAc (4/1, v/v) affording compound **22a** as an off-white solid (124.3 mg, 0.465 mmol, 93%).

**$^1\text{H NMR}$**  (400 MHz,  $\text{CDCl}_3$ )  $\delta$  = 9.30 – 9.24 (m, 1H), 8.57 (d,  $J$  = 1.5 Hz, 1H), 8.19 – 8.15 (m, 2H), 8.06 – 8.01 (m, 2H), 7.88 (d,  $J$  = 1.2 Hz, 1H), 7.81 – 7.79 (m, 1H), 4.42 (q,  $J$  = 7.1 Hz, 2H), 1.43 (t,  $J$  = 7.1 Hz, 3H).

**$^{13}\text{C NMR}$**  (101 MHz,  $\text{CDCl}_3$ )  $\delta$  = 166.4, 143.5, 140.5, 140.2, 138.8, 136.4, 130.8, 130.4, 126.2, 116.0, 114.3, 61.3, 14.5.

**HRMS (EI):** calculated for  $\text{C}_{15}\text{H}_{13}\text{N}_3\text{O}_2^{+}$ : 267.1008, found: 267.1003 [M] $^{+}$ .

**MS (70 eV, EI) m/z (%):** 267 (74), 239 (30), 222 (100), 194 (44), 140 (22).

**IR (ATR)  $\tilde{\nu}$  ( $\text{cm}^{-1}$ ):** 3137 (w), 3105 (w), 3082 (w), 2992 (w), 2957 (w), 2924 (m), 2854 (m), 1694 (s), 1609 (m), 1574 (w), 1528 (w), 1491 (w), 1476 (m), 1450 (m), 1438 (m), 1409 (w), 1369 (m), 1347 (m), 1335 (m), 1315 (m), 1303 (m), 1274 (s), 1264 (s), 1180 (m), 1160 (w), 1145 (m), 1125 (m), 1107 (s), 1028 (w), 1016 (m), 934 (w), 913 (s), 876 (w), 864 (w), 853 (w), 839 (s), 806 (w), 774 (vs), 760 (vs), 733 (w), 697 (s), 675 (w), 653 (m).

**Mp:**  $182\text{ }^{\circ}\text{C}$ .

### 3-(Imidazo[1,2-a]pyrazin-6-yl)benzonitrile (**22b**)

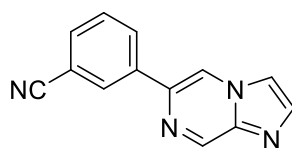

3-Iodobenzonitrile (1.15 g, 5 mmol, 1.0 equiv) was dissolved in THF (5 mL) and cooled to  $-20\text{ }^{\circ}\text{C}$ . Then, a solution of *i*PrMgCl·LiCl (1.2M in THF, 5.25 mmol, 1.05 equiv) was added dropwise at this temperature and the mixture was stirred at  $-20\text{ }^{\circ}\text{C}$  for 30 min. The organometallic species was then let warm to room temperature and titrated against iodine.

Next, according to **TP6, 6** (76.8 mg, 0.5 mmol, 1 equiv) and Pd-PEPPSI-*i*Pr (5 mol%, 17.0 mg) were dissolved in THF (1.0 mL). Then, the freshly prepared zinc reagent (1.5 equiv, 0.75 mmol) was added dropwise. The resulting reaction mixture was stirred at  $25\text{ }^{\circ}\text{C}$  for 5 h. The reaction mixture was quenched with saturated aqueous  $\text{NH}_4\text{Cl}$  solution and extracted with EtOAc (3 x 15 mL). The collected organic layers were dried over  $\text{MgSO}_4$  and concentrated under reduced pressure. The crude product was purified by flash chromatography using silica gel and *i*-hexane/EtOAc (4/1, v/v) affording compound **22b** as an off-white solid (99.1 mg, 0.45 mmol, 90%).

**$^1\text{H NMR}$**  (400 MHz,  $\text{CDCl}_3$ )  $\delta$  = 9.24–9.18 (m, 1H), 8.54 (d,  $J$  = 1.6 Hz, 1H), 8.27 (t,  $J$  = 1.8 Hz, 1H), 8.23–8.17 (m, 1H), 7.88 (d,  $J$  = 1.1 Hz, 1H), 7.80 (t,  $J$  = 0.9 Hz, 1H), 7.70 (dt,  $J$  = 7.7, 1.4 Hz, 1H), 7.61 (t,  $J$  = 7.8 Hz, 1H).

**$^{13}\text{C NMR}$**  (101 MHz,  $\text{CDCl}_3$ )  $\delta$  = 143.7, 140.2, 137.8, 137.7, 136.6, 132.2, 130.5, 130.0, 130.0, 118.7, 115.8, 114.5, 113.4.

**HRMS (EI)**: calculated for  $\text{C}_{13}\text{H}_8\text{N}_4^{++}$ : 220.0749, found: 220.0744 [M] $^{++}$ .

**MS (70 eV, EI) m/z**: 220 (100), 139 (10), 71 (13), 57 (20).

**IR (ATR)  $\tilde{\nu}$  ( $\text{cm}^{-1}$ )**: 3156 (w), 3076 (w), 3035 (w), 2956 (m), 2922 (m), 2853 (m), 2227 (m), 2176 (w), 2140 (w), 1968 (w), 1906 (w), 1712 (w), 1682 (w), 1646 (w), 1613 (w), 1596 (w), 1580 (w), 1513 (m), 1479 (m), 1468 (m), 1448 (m), 1410 (m), 1347 (m), 1330 (m), 1323 (m), 1310 (m), 1300 (s), 1280 (m), 1261 (m), 1206 (m), 1173 (w), 1154 (w), 1135 (s), 1064 (m), 1044 (m), 928 (s), 914 (m), 885 (w), 858 (m), 848 (m), 806 (s), 794 (m), 760 (vs), 715 (m), 686 (s), 666 (w).

**Mp**:  $248\text{ }^{\circ}\text{C}$ .

## 6-(2-(1,3-Dioxan-2-yl)ethyl)imidazo[1,2-a]pyrazine (22c)

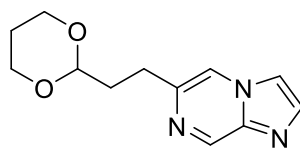

LiCl (318 mg, 7.5 mmol, 1.5 equiv) was dried in a sealed flask under high vacuum at 430 °C for 5 min with a heat gun. After cooling to room temperature and flushing the flask with Ar, Mg turnings (300 mg, 12.5 mmol, 2.5 equiv) were added as well as a solution of ZnCl<sub>2</sub> (1.0M in THF, 5 mL, 5 mmol, 1.0 equiv). Then, 2-(2-Bromoethyl)-1,3-dioxane (0.7 mL, 5 mmol, 1.0 equiv) was added dropwise and the solution was stirred at 25 °C for 2 h before titration against iodine to determine the concentration.

Next, according to **TP6**, **6** (76.8 mg, 0.5 mmol, 1 equiv) and Pd-PEPPSI-*i*Pent (5 mol%, 19.8 mg) were dissolved in THF (1.0 mL). Then, the freshly prepared zinc reagent (1.5 equiv, 0.75 mmol) was added dropwise. The resulting reaction mixture was stirred at 25 °C for 16 h. The reaction mixture was quenched with saturated aqueous NH<sub>4</sub>Cl solution and extracted with EtOAc (3 x 15 mL). The collected organic layers were dried over MgSO<sub>4</sub> and concentrated under reduced pressure. The crude product was purified by flash chromatography using silica gel and *i*-hexane/EtOAc (4/1, v/v) affording compound **22c** as a yellow oil (79.3 mg, 0.34 mmol, 68%).

**<sup>1</sup>H NMR** (400 MHz, CDCl<sub>3</sub>) δ = 9.04 (d, *J* = 1.4 Hz, 1H), 7.90 (d, *J* = 1.5 Hz, 1H), 7.75 (d, *J* = 1.1 Hz, 1H), 7.61 (d, *J* = 0.9 Hz, 1H), 4.57 (t, *J* = 5.1 Hz, 1H), 4.15–4.06 (m, 2H), 3.82–3.69 (m, 2H), 2.85 (dd, *J* = 8.7, 6.8 Hz, 2H), 2.17–1.98 (m, 3H), 1.39–1.29 (m, 1H).

**<sup>13</sup>C NMR** (101 MHz, CDCl<sub>3</sub>) δ = 143.3, 141.8, 135.5, 116.0, 113.3, 101.4, 67.1, 53.6, 34.5, 29.1, 25.9.

**HRMS (EI)**: calculated for C<sub>12</sub>H<sub>15</sub>N<sub>3</sub>O<sub>2</sub><sup>++</sup>: 233.1164, found: 233.1158 [M]<sup>++</sup>.

**MS (70 eV, EI) m/z**: 233 (16), 174 (26), 146 (100), 133 (41), 87 (45), 59 (17).

**IR (ATR)  $\tilde{\nu}$  (cm<sup>-1</sup>)**: 2960 (m), 2928 (m), 2853 (m), 1622 (w), 1512 (m), 1491 (w), 1447 (m), 1431 (m), 1406 (m), 1379 (m), 1341 (m), 1303 (m), 1265 (w), 1243 (w), 1144 (s), 1130 (vs), 1082 (m), 1044 (m), 1000 (m), 972 (w), 932 (m), 885 (m), 851 (m), 832 (w), 784 (w), 748 (m), 739 (w).

#### 4-(Imidazo[1,2-a]pyrazin-6-yl)butanenitrile (**22d**)

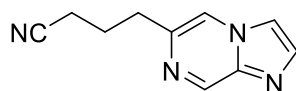

LiCl (318 mg, 7.5 mmol, 1.5 equiv) was dried in a sealed flask under high vacuum at 430 °C for 5 min with a heat gun. After cooling to room temperature and flushing the flask with Ar, Mg turnings (300 mg, 12.5 mmol, 2.5 equiv) were added as well as a solution of ZnCl<sub>2</sub> (1.0M in THF, 5 mL, 5 mmol, 1.0 equiv). Then, 4-bromobutanenitrile (0.5 mL, 5 mmol, 1.0 equiv) was added dropwise and the solution was stirred at 25 °C for 2 h before titration against iodine to determine the concentration.

Next, according to **TP6**, **6** (76.8 mg, 0.5 mmol, 1 equiv) and Pd-PEPPSI-*i*Pent (5 mol%, 19.8 mg) were dissolved in THF (1.0 mL). Then, the freshly prepared zinc reagent (1.5 equiv, 0.75 mmol) was added dropwise. The resulting reaction mixture was stirred at 25 °C for 16 h. The reaction mixture was quenched with saturated aqueous NH<sub>4</sub>Cl solution and extracted with EtOAc (3 x 15 mL). The collected organic layers were dried over MgSO<sub>4</sub> and concentrated under reduced pressure. The crude product was purified by flash chromatography using silica gel and *i*-hexane/EtOAc (4/1, v/v) affording compound **22d** as a yellow oil (91.3 mg, 0.49 mmol, 98%).

**<sup>1</sup>H NMR** (400 MHz, CDCl<sub>3</sub>) δ = 9.11–9.08 (m, 1H), 8.01 (dt, *J* = 1.5, 0.8 Hz, 1H), 7.81 (d, *J* = 1.1 Hz, 1H), 7.67 (t, *J* = 0.9 Hz, 1H), 2.96–2.91 (m, 2H), 2.42 (t, *J* = 6.9 Hz, 2H), 2.18 (p, *J* = 7.2 Hz, 2H).

**<sup>13</sup>C NMR** (101 MHz, CDCl<sub>3</sub>) δ = 143.5, 139.9, 139.8, 135.6, 119.4, 116.8, 113.6, 32.9, 24.5, 16.6.

**HRMS (EI)**: calculated for C<sub>10</sub>H<sub>10</sub>N<sub>4</sub><sup>+</sup>: 186.0905, found: 186.0900 [M]<sup>+</sup>.

**MS (70 eV, EI) m/z**: 186 (15), 146 (21), 133 (100), 79 (12), 52 (13).

**IR (ATR)  $\tilde{\nu}$  (cm<sup>-1</sup>)**: 3150 (w), 3049 (w), 3019 (w), 2949 (m), 2921 (m), 2868 (w), 2239 (w), 1713 (w), 1627 (w), 1516 (m), 1489 (m), 1454 (m), 1449 (m), 1430 (m), 1368 (m), 1345 (m), 1321 (m), 1304 (m), 1260 (m), 1160 (m), 1140 (s), 1085 (w), 1074 (w), 1055 (w), 1024 (w), 941 (m), 928 (m), 920 (m), 886 (m), 873 (m), 838 (w), 782 (w), 760 (w), 738 (vs), 670 (m).

#### 6-(4-Fluorobenzyl)imidazo[1,2-a]pyrazine (**22e**)

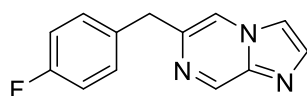

LiCl (318 mg, 7.5 mmol, 1.5 equiv) was dried in a sealed flask under high vacuum at 430 °C for 5 min with a heat gun. After cooling to room temperature and flushing the flask with Ar, Mg turnings (300 mg, 12.5 mmol, 2.5 equiv) were added as well as a solution of ZnCl<sub>2</sub> (1.0 M in THF, 5 mL, 5 mmol, 1.0 equiv). Then, 1-(chloromethyl)-4-fluorobenzene (0.6 mL, 5 mmol, 1.0 equiv) was added dropwise and the solution was stirred at 25 °C for 2 h before titration against iodine to determine the concentration.

Next, according to **TP6**, **6** (76.8 mg, 0.5 mmol, 1 equiv) and Pd-PEPPSI-iPent (5 mol%, 19.8 mg) were dissolved in THF (1.0 mL). Then, the freshly prepared zinc reagent (1.5 equiv, 0.75 mmol) was added dropwise. The resulting reaction mixture was stirred at 25 °C for 16 h. The reaction mixture was quenched with saturated aqueous NH<sub>4</sub>Cl solution and extracted with EtOAc (3 x 15 mL). The collected organic layers were dried over MgSO<sub>4</sub> and concentrated under reduced pressure. The crude product was purified by flash chromatography using silica gel and *i*-hexane/EtOAc (4/1, v/v) affording compound **22e** as a white solid (107.8 mg, 0.475 mmol, 95%).

**<sup>1</sup>H NMR** (400 MHz, CDCl<sub>3</sub>) δ = 9.09–9.04 (m, 1H), 7.80–7.74 (m, 2H), 7.60 (d, *J* = 0.9 Hz, 1H), 7.29–7.23 (m, 2H), 7.07–6.98 (m, 2H), 4.10 (s, 2H).

**<sup>13</sup>C NMR** (101 MHz, CDCl<sub>3</sub>) δ = 161.9 (d, *J* = 245.1 Hz), 143.5, 141.6, 139.9, 135.8, 134.1 (d, *J* = 3.4 Hz), 130.7 (d, *J* = 8.0 Hz), 116.7, 115.7 (d, *J* = 21.4 Hz), 113.6, 40.3.

**HRMS (EI)**: calculated for C<sub>10</sub>H<sub>10</sub>N<sub>4</sub><sup>++</sup>: 226.0781, found: 226.0774 [M-H]<sup>++</sup>.

**MS (70 eV, EI) m/z**: 226 (100), 133 (11), 109 (9), 57 (13).

**IR (ATR)  $\tilde{\nu}$  (cm<sup>-1</sup>)**: 3144 (w), 3114 (w), 3079 (w), 3054 (w), 3036 (w), 3002 (w), 2955 (w), 2922 (m), 2853 (m), 2578 (w), 1713 (w), 1619 (m), 1601 (m), 1508 (vs), 1486 (m), 1460 (m), 1438 (m), 1417 (w), 1381 (w), 1353 (m), 1337 (m), 1313 (s), 1302 (m), 1287 (m), 1260 (w), 1248 (m), 1238 (m), 1222 (vs), 1158 (m), 1148 (m), 1140 (s), 1093 (m), 1073 (w), 1016 (m), 980 (w), 959 (w), 952 (m), 939 (w), 916 (m), 886 (m), 864 (m), 849 (m), 836 (m), 826 (m), 813 (s), 782 (m), 775 (s), 751 (m), 730 (vs), 710 (m), 662 (w).

**Mp**: 110 °C.

**6-(4-Chlorophenyl)imidazo[1,2-*a*]pyrazine-3-carbonitrile (S1)**



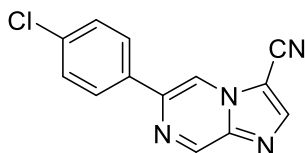

6-(4-Chlorophenyl)imidazo[1,2-*a*]pyrazine-3-carbonitrile was prepared according to **TP7** on a 0.4 mmol scale using 6-chloroimidazo[1,2-*a*]pyrazine-3-carbonitrile (**7e**, 71.4 mg, 0.4 mmol, 1.0 equiv), 4-chlorophenylboronic acid, pinacol ester (1.2 equiv, 0.48 mmol), Pd(PPh<sub>3</sub>)<sub>4</sub> (46 mg, 0.04 mmol, 10 mol%) and K<sub>2</sub>CO<sub>3</sub> (110 mg, 0.8 mmol, 2.0 equiv) in 1.3 mL 1,4-dioxane/water 9/1 (100 °C, 5 h). Purified by flash chromatography using *i*-hexane/EtOAc (7/3, v/v) to afford desired 6-(4-chlorophenyl)imidazo[1,2-*a*]pyrazine-3-carbonitrile as a white solid (0.19 mmol, 50 mg, 49%).

**<sup>1</sup>H NMR** (400 MHz, CDCl<sub>3</sub>) δ = 9.32 (d, *J*=1.6, 1H), 8.62 (d, *J*=1.6, 1H), 8.28 (s, 1H), 7.98–7.90 (m, 2H), 7.51 (d, *J*=8.6, 2H).

**<sup>13</sup>C NMR** (101 MHz, CDCl<sub>3</sub>) δ = 143.7, 143.3, 143.2, 141.8, 140.9, 136.2, 133.5, 129.6, 127.9, 114.4, 109.9, 100.2.

**HRMS (EI)**: calculated for C<sub>13</sub>H<sub>7</sub>CIN<sub>4</sub><sup>+</sup>: 254.0354, found 254.0355 [M]<sup>+</sup>.

**MS (70 eV, EI) m/z (%)**: 256 (30), 254 (100), 219 (20), 123 (25), 114 (27).

**IR (ATR)  $\tilde{\nu}$  (cm<sup>-1</sup>)**: 3052, 2222, 1725, 1612, 1599, 1492, 1483, 1465, 1428, 1346, 1318, 1291, 1270, 1238, 1169, 1108, 1087, 1011, 910, 886, 861, 823, 808, 775, 654.

**Mp**: 220.5–222.6 °C.

### 6-Phenylimidazo[1,2-*a*]pyrazine-3-carbonitrile (**S2**)

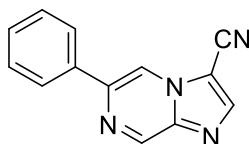

6-Phenylimidazo[1,2-*a*]pyrazine-3-carbonitrile was prepared according to **TP7** on a 0.4 mmol scale using 6-chloroimidazo[1,2-*a*]pyrazine-3-carbonitrile (**7e**, 71.4 mg, 0.4 mmol, 1.0 equiv), phenylboronic acid, pinacol ester (1.2 equiv, 0.48 mmol), Pd(PPh<sub>3</sub>)<sub>4</sub> (46 mg, 0.04 mmol, 10 mol%) and K<sub>2</sub>CO<sub>3</sub> (110 mg, 0.8 mmol, 2.0 equiv) in 1.3 mL 1,4-dioxane/water 9/1 (100 °C,

5 h). Purified by flash chromatography using *i*-hexane/EtOAc (7/3, v/v) to afford desired 6-phenylimidazo[1,2-*a*]pyrazine-3-carbonitrile as a white solid (0.20 mmol, 42 mg, 48%).

**<sup>1</sup>H NMR** (400 MHz, CDCl<sub>3</sub>) δ = 9.32 (d, *J*=1.6, 1H), 8.61 (d, *J*=1.6, 1H), 8.27 (s, 1H), 8.01–7.93 (m, 2H), 7.57–7.43 (m, 3H).

**<sup>13</sup>C NMR** (101 MHz, CDCl<sub>3</sub>) δ = 143.6, 143.1, 142.9, 140.9, 135.0, 130.0, 129.4, 126.7, 114.4, 110.0, 100.0.

**HRMS (EI)**: calculated for C<sub>13</sub>H<sub>8</sub>N<sub>4</sub><sup>++</sup>: 220.0743, found 220.0744 [M]<sup>++</sup>.

**MS (70 eV, EI) m/z (%)**: 219 (17), 165 (38), 116 (27), 114 (33), 103 (29), 89 (68), 77 (100), 76 (32), 74 (33), 66 (28), 63 (53).

**IR (ATR)  $\tilde{\nu}$  (cm<sup>-1</sup>)**: 3062, 2218, 1728, 1615, 1579, 1518, 1485, 1467, 1418, 1348, 1316, 1304, 1266, 1237, 1164, 1117, 1070, 1019, 913, 872, 820, 768, 749, 689, 665.

**Mp**: 157.0–159.5 °C

### 6-(3,4-Dimethoxyphenyl)imidazo[1,2-*a*]pyrazine-3-carbonitrile (**S3**)

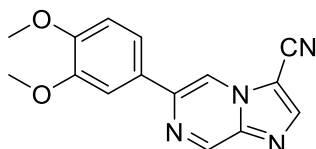

6-(3,4-Dimethoxyphenyl)imidazo[1,2-*a*]pyrazine-3-carbonitrile was prepared according to **TP7** on a 0.4 mmol scale using 6-chloroimidazo[1,2-*a*]pyrazine-3-carbonitrile (**7e**, 71.4 mg, 0.4 mmol, 1.0 equiv), 3,4-dimethoxyphenylboronic acid pinacol ester (1.2 equiv, 0.48 mmol), Pd(PPh<sub>3</sub>)<sub>4</sub> (46 mg, 0.04 mmol, 10 mol%) and K<sub>2</sub>CO<sub>3</sub> (110 mg, 0.8 mmol, 2.0 equiv) in 1.3 mL 1,4-dioxane/water 9/1 (100 °C, 5 h). Purified by flash chromatography using *i*-hexane/EtOAc (3/7, v/v) to afford desired compound 6-(3,4-dimethoxyphenyl)imidazo[1,2-*a*]pyrazine-3-carbonitrile as a yellow solid (0.21 mmol, 59.5 mg, 53%).

**<sup>1</sup>H NMR** (400 MHz, CDCl<sub>3</sub>) δ = 9.31 (d, *J*=1.5, 1H), 8.56 (d, *J*=1.6, 1H), 8.27 (s, 1H), 7.59 (d, *J*=2.2, 1H), 7.52 (dd, *J*=8.4, 2.2, 1H), 7.01 (d, *J*=8.4, 1H), 4.02 (s, 3H), 3.97 (s, 3H).

**<sup>13</sup>C NMR** (101 MHz, CDCl<sub>3</sub>) δ = 150.8, 149.8, 143.4, 143.1, 142.8, 140.9, 127.8, 119.2, 113.6, 111.6, 110.2, 109.8, 99.8, 56.3, 56.2.

**HRMS (EI):** calculated for C<sub>15</sub>H<sub>12</sub>N<sub>4</sub>O<sub>2</sub><sup>++</sup>: 280.0955, found 280.0960 [M]<sup>++</sup>.

**MS (70 eV, EI) m/z (%):** 281 (19), 280 (100), 237 (28), 97 (17), 83 (21), 73 (18), 69 (21), 57 (22), 55 (20).

**IR (ATR)  $\tilde{\nu}$  (cm<sup>-1</sup>):** 3412, 2979, 2941, 2220, 1613, 1598, 1585, 1522, 1499, 1469, 1432, 1370, 1333, 1318, 1293, 1261, 1236, 1214, 165, 1142, 1072, 1016, 950, 930, 882, 874, 862, 801, 769, 732, 666.

**Mp:** 245.7–248.1 °C

### 6-Chloro-8-(4-methoxyphenyl)-5,8-dihydroimidazo[1,2-a]pyrazine (26a)

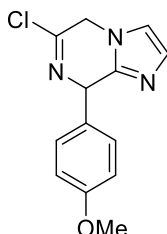

LiCl (129 mg, 3.0 mmol, 1.2 equiv) was flame-dried in a sealed flask under high vacuum at 550 °C for 5 min with a heat gun. After cooling to room temperature and flushing the flask with Ar, Mg turnings (72 mg, 3.0 mmol, 1.2 equiv) were added. Then, 1-bromo-4-methoxybenzene (467.5 mg, 2.5 mmol, 1.0 equiv) was added dropwise and the solution was stirred at 25 °C for 16 h before titration against iodine to determine the concentration.<sup>3</sup>

To a solution of 6-chloroimidazo[1,2-a]pyrazine (**6**, 76.8 mg, 0.5 mmol, 1.0 equiv) in THF (0.5 M) (4-methoxyphenyl)magnesium bromide-lithium chloride (1.2 equiv, 0.6 mmol) was added at 40 °C. The reaction mixture was stirred at 40 °C for 10 min. Then, the mixture was quenched with saturated aqueous NH<sub>4</sub>Cl solution and extracted with EtOAc (3 x 20 mL). The collected organic layers were dried over MgSO<sub>4</sub> and concentrated *in vacuo*. The product was purified by flash chromatography using *n*-Hexane/EtOAc (1/9, v/v) to afford desired compound **26a** as a colorless oil (0.31 mmol, 82 mg, 63%).

**<sup>1</sup>H NMR** (400 MHz, CDCl<sub>3</sub>)  $\delta$  = 7.23 – 7.17 (m, 2H), 7.13 (d, *J* = 1.4 Hz, 1H), 6.91 – 6.83 (m, 3H), 6.13 (t, *J* = 3.9 Hz, 1H), 4.93 (dd, *J* = 4.0, 0.9 Hz, 2H), 3.77 (s, 3H).

**<sup>13</sup>C NMR** (101 MHz, CDCl<sub>3</sub>)  $\delta$  = 159.6, 148.5, 141.7, 130.8, 130.0, 130.0, 128.7, 116.4, 114.4, 62.2, 55.4, 50.2.

**HRMS (EI):** calculated for C<sub>13</sub>H<sub>10</sub>ClON<sub>3</sub>: 259.0512, found: 259.0508 [M-2H]<sup>+</sup>.

**MS (70 eV, EI) m/z:** 261 (32), 260 (14), 259 (100), 246 (16), 244 (50), 216 (30), 181 (16).

#### 6-Chloro-8-(4-methoxyphenyl)imidazo[1,2-a]pyrazine (27a)

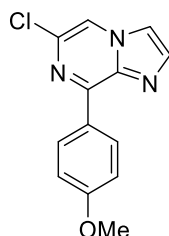

LiCl (129 mg, 3.0 mmol, 1.2 equiv) was flame-dried in a sealed flask under high vacuum at 550 °C for 5 min with a heat gun. After cooling to room temperature and flushing the flask with Ar, Mg turnings (72 mg, 3.0 mmol, 1.2 equiv) were added. Then, 1-bromo-4-methoxybenzene (467.5 mg, 2.5 mmol, 1.0 equiv) was added dropwise and the solution was stirred at 25 °C for 16 h before titration against iodine to determine the concentration.<sup>3</sup>

Compound **27a** was prepared according to **TP8** on a 0.5 mmol scale using (4-methoxyphenyl)magnesium bromide-lithium chloride (1.2 equiv, 0.6 mmol) as a nucleophile. Purified by flash chromatography using *n*-Hexane/EtOAc (6/4, v/v) to afford desired compound **27a** as a colorless solid (0.34 mmol, 88 mg, 68%).

**<sup>1</sup>H NMR** (400 MHz, CDCl<sub>3</sub>) δ = 8.82 – 8.71 (m, 2H), 8.04 (s, 1H), 7.83 (d, *J* = 1.1 Hz, 1H), 7.67 (d, *J* = 1.1 Hz, 1H), 7.10 – 6.98 (m, 2H), 3.88 (s, 3H).

**<sup>13</sup>C NMR** (101 MHz, CDCl<sub>3</sub>) δ = 162.1, 148.5, 138.4, 136.0, 134.2, 131.8, 127.5, 114.6, 114.2, 113.9, 55.5.

**HRMS (EI):** calculated for C<sub>13</sub>H<sub>9</sub>ClON<sub>3</sub>: 259.0512, found: 259.0506 [M]<sup>+</sup>.

**MS (70 eV, EI) m/z:** 259 (99), 244 (65), 218 (32), 216 (100), 209 (25), 181 (40).

#### 4-(6-Chloroimidazo[1,2-a]pyrazin-8-yl)-*N,N*-dimethylaniline (27b)

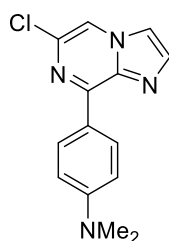

LiCl (129 mg, 3.0 mmol, 1.2 equiv) was flame-dried in a sealed flask under high vacuum at 550 °C for 5 min with a heat gun. After cooling to room temperature and flushing the flask with Ar, Mg turnings (72 mg, 3.0 mmol, 1.2 equiv) were added. Then, 4-bromo-*N,N*-dimethylaniline (500.2 mg, 2.5 mmol, 1.0 equiv) was added dropwise and the solution was stirred at 25 °C for 16 h before titration against iodine to determine the concentration.<sup>3</sup>

Compound **27b** was prepared according to **TP8** on a 0.5 mmol scale using (4-(dimethylamino)phenyl)magnesium bromide-lithium chloride (1.2 equiv, 0.6 mmol) as a nucleophile. Purified by recrystallization with acetone to afford desired compound **27b** as a colorless solid (0.39 mmol, 106 mg, 78%).

**<sup>1</sup>H NMR** (400 MHz, DMSO)  $\delta$  = 8.79 – 8.72 (m, 2H), 8.68 (s, 1H), 8.11 (d,  $J$  = 1.1 Hz, 1H), 7.87 (d,  $J$  = 1.1 Hz, 1H), 6.87 – 6.82 (m, 2H), 3.04 (s, 6H).

**<sup>13</sup>C NMR** (101 MHz, DMSO)  $\delta$  = 152.0, 150.9, 130.9, 129.2, 115.5, 114.7, 113.8, 111.2, 101.7, 53.5, 18.1, 16.7.

**HRMS (EI)**: calculated for C<sub>14</sub>H<sub>13</sub>ClN<sub>4</sub>: 272.0829, found: 272.0824 [M]<sup>+</sup>.

**MS (70 eV, EI) m/z**: 274 (32), 273 (14), 273 (22), 272 (100), 271 (69), 256 (14).

### 6-Chloro-8-(naphthalen-2-yl)imidazo[1,2-*a*]pyrazine (**27c**)

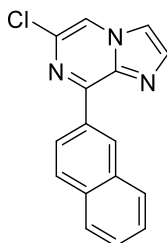

LiCl (129 mg, 3.0 mmol, 1.2 equiv) was flame-dried in a sealed flask under high vacuum at 550 °C for 5 min with a heat gun. After cooling to room temperature and flushing the flask with Ar, Mg turnings (72 mg, 3.0 mmol, 1.2 equiv) were added. Then, 2-bromonaphthalene (517.5 mg, 2.5 mmol, 1.0 equiv) was added dropwise and the solution was stirred at 25 °C for 16 h before titration against iodine to determine the concentration.<sup>3</sup>

Compound **27c** was prepared according to **TP8** on a 0.5 mmol scale using naphthalen-2-ylmagnesium bromide-lithium chloride (1.2 equiv, 0.6 mmol) as a nucleophile. Purified by flash chromatography using *i*Hexane/EtOAc (6/4, v/v) to afford desired compound **27c** as a yellowish solid (0.18 mmol, 51 mg, 37%).

**<sup>1</sup>H NMR** (400 MHz, CDCl<sub>3</sub>) δ = 9.52 – 9.45 (m, 1H), 8.73 (dd, *J* = 8.7, 1.8 Hz, 1H), 8.10 (s, 1H), 8.09 – 8.01 (m, 1H), 7.97 (d, *J* = 8.7 Hz, 1H), 7.91 (d, *J* = 1.1 Hz, 1H), 7.88 (dt, *J* = 7.7, 1.2 Hz, 1H), 7.70 (d, *J* = 1.1 Hz, 1H), 7.61 – 7.48 (m, 2H).

**<sup>13</sup>C NMR** (101 MHz, CDCl<sub>3</sub>) δ = 148.7, 138.7, 136.3, 134.7, 134.3, 133.1, 132.2, 131.3, 129.7, 128.2, 127.7, 127.7, 126.4, 126.0, 115.3, 114.4.

**HRMS (EI):** calculated for C<sub>16</sub>H<sub>10</sub>ClN<sub>3</sub>: 279.0563, found: 279.0555 [M]<sup>+</sup>.

**MS (70 eV, EI) m/z:** 279 (100), 278 (65), 242 (15).

### 6-Chloro-8-(4-fluorophenethyl)imidazo[1,2-*a*]pyrazine (27d)

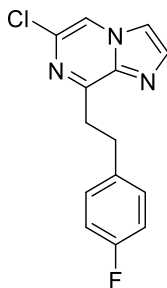

LiCl (129 mg, 3.0 mmol, 1.2 equiv) was flame-dried in a sealed flask under high vacuum at 550 °C for 5 min with a heat gun. After cooling to room temperature and flushing the flask with Ar, Mg turnings (72 mg, 3.0 mmol, 1.2 equiv) were added. Then, 1-(2-bromoethyl)-4-fluorobenzene (507.5 mg, 2.5 mmol, 1.0 equiv) was added dropwise and the solution was stirred at 25 °C for 16 h before titration against iodine to determine the concentration.<sup>3</sup>

Compound **27d** was prepared according to **TP8** on a 0.5 mmol scale using (4-fluorophenethyl)magnesium bromide-lithium chloride (1.2 equiv, 0.6 mmol) as a nucleophile. Purified by preparative HPLC to afford desired compound **27d** as a colorless liquid (0.34 mmol, 92.1 mg, 67%).

**<sup>1</sup>H NMR** (400 MHz, DMSO) δ = 8.76 (s, 1H), 8.10 (s, 1H), 7.83 (s, 1H), 7.33 – 7.25 (m, 2H), 7.14 – 7.03 (m, 2H), 3.42 (dd, *J* = 9.3, 6.6 Hz, 2H), 3.14 (dd, *J* = 9.3, 6.6 Hz, 2H).

**<sup>13</sup>C NMR** (101 MHz, DMSO) δ = 160.7 (d, *J* = 241.4 Hz), 153.3, 138.6, 137.1 (d, *J* = 3.1 Hz), 135.7, 132.1, 130.1 (d, *J* = 7.9 Hz), 116.5, 116.0, 115.0 (d, *J* = 21.0 Hz), 34.5, 31.6.

**HRMS (EI):** calculated for C<sub>14</sub>H<sub>11</sub>ClFN<sub>3</sub>: 275.0626, found: 275.0620 [M]<sup>+</sup>.

**MS (70 eV, EI) m/z:** 275 (100), 274 (51), 260 (16), 180 (17), 153 (42), 109 (61).

### 8-(*tert*-Butyl)-6-chloroimidazo[1,2-*a*]pyrazine (**27e**)

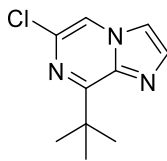

Compound **27e** was prepared according to **TP8** on a 0.5 mmol scale using *tert*-butylmagnesium bromide (1.2 equiv, 0.6 mmol) as a nucleophile. Purified by flash chromatography using EtOAc to afford desired compound **27e** as a yellowish solid (0.48 mmol, 100.0 mg, 95%).

**<sup>1</sup>H NMR** (400 MHz, CDCl<sub>3</sub>) δ = 8.05 (s, 1H), 7.76 (d, *J* = 1.1 Hz, 1H), 7.60 (d, *J* = 1.1 Hz, 1H), 1.61 (s, 9H).

**<sup>13</sup>C NMR** (101 MHz, CDCl<sub>3</sub>) δ = 161.9, 138.4, 134.7, 133.4, 115.2, 113.5, 39.4, 29.8, 28.8.

**HRMS (EI)**: calculated for C<sub>10</sub>H<sub>12</sub>ClN<sub>3</sub>: 209.0720, found: 209.0712 [M]<sup>+</sup>.

**MS (70 eV, EI) m/z**: 209 (30), 196 (32), 194 (100), 167 (22), 153 (13).

### 6-Chloro-8-(4-methoxyphenyl)-5-(phenylthio)imidazo[1,2-*a*]pyrazine (**27f**)

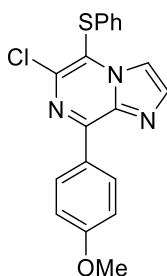

LiCl (129 mg, 3.0 mmol, 1.2 equiv) was flame-dried in a sealed flask under high vacuum at 550 °C for 5 min with a heat gun. After cooling to room temperature and flushing the flask with Ar, Mg turnings (72 mg, 3.0 mmol, 1.2 equiv) were added. Then, 1-bromo-4-methoxybenzene (467.5 mg, 2.5 mmol, 1.0 equiv) was added dropwise and the solution was stirred at 25 °C for 16 h before titration against iodine to determine the concentration.<sup>3</sup>

To a solution of 6-chloroimidazo[1,2-*a*]pyrazine (**6**, 76.8 mg, 0.5 mmol, 1.0 equiv) in THF (0.5 M) (4-methoxyphenyl)magnesium bromide-lithium chloride (1.2 equiv, 0.6 mmol) was added at 40 °C. The reaction mixture was stirred at 40 °C for 10 min. Then, the resulting mixture was added dropwise to *S*-phenyl benzenethiosulfonate (150.2 mg, 0.6 mmol, 1.2 equiv) and stirred at 25 °C for 2 h. Then, the mixture was quenched with saturated aqueous

NH<sub>4</sub>Cl solution and extracted with EtOAc (3 x 20 mL). The collected organic layers were dried over MgSO<sub>4</sub> and concentrated *in vacuo*. The product was purified by flash chromatography using *n*-Hexane/EtOAc (9/1, v/v) to afford desired compound **27f** as a colorless oil (0.16 mmol, 60 mg, 33%).

**<sup>1</sup>H NMR** (400 MHz, CDCl<sub>3</sub>) δ = 8.85 – 8.78 (m, 2H), 7.88 (d, *J* = 1.1 Hz, 1H), 7.78 (d, *J* = 1.1 Hz, 1H), 7.31 – 7.18 (m, 5H), 7.08 – 6.98 (m, 2H), 3.88 (s, 3H).

**<sup>13</sup>C NMR** (101 MHz, CDCl<sub>3</sub>) δ = 162.5, 148.3, 141.4, 138.7, 136.3, 132.2, 131.1, 129.9, 128.6, 127.9, 127.2, 118.6, 115.9, 114.1, 55.6.

**HRMS (EI)**: calculated for C<sub>19</sub>H<sub>14</sub>ClOSN<sub>3</sub>: 367.0546, found: 367.0543 [M]<sup>+</sup>.

**MS (70 eV, EI) m/z**: 367 (100), 366 (19), 332 (26), 290 (15), 185 (24).



# NMR Spectra

## 6-Chloro-8-iodoimidazo[1,2-a]pyrazine (7a)

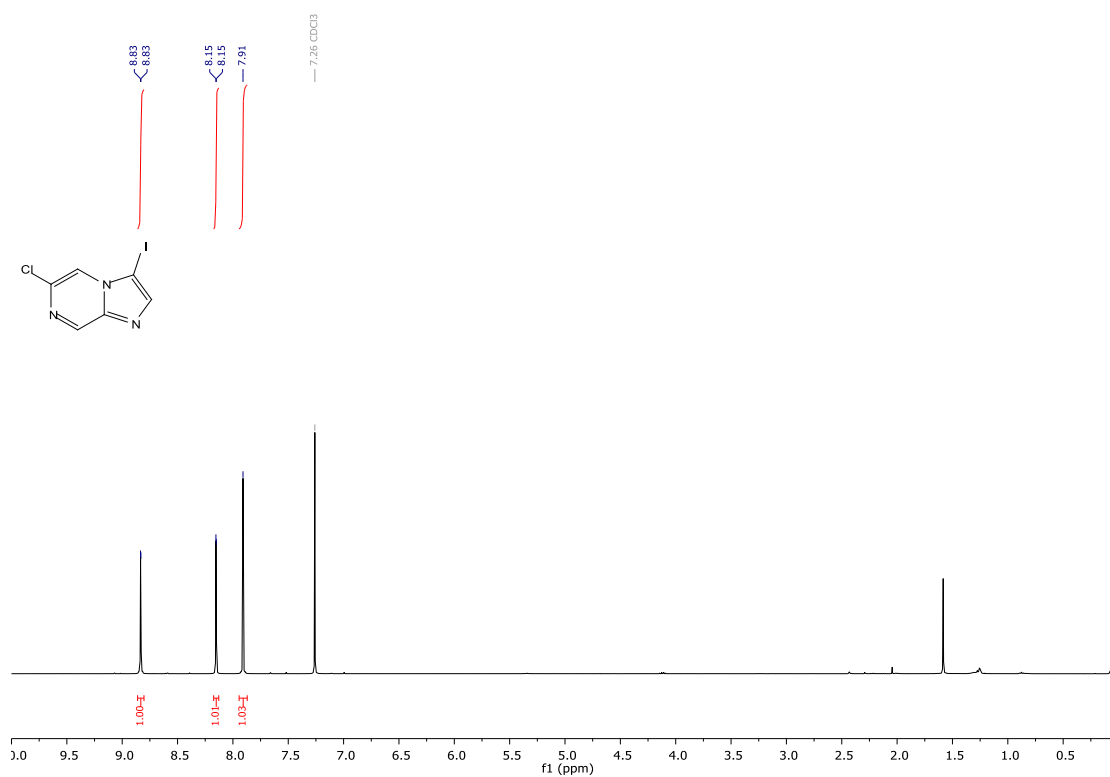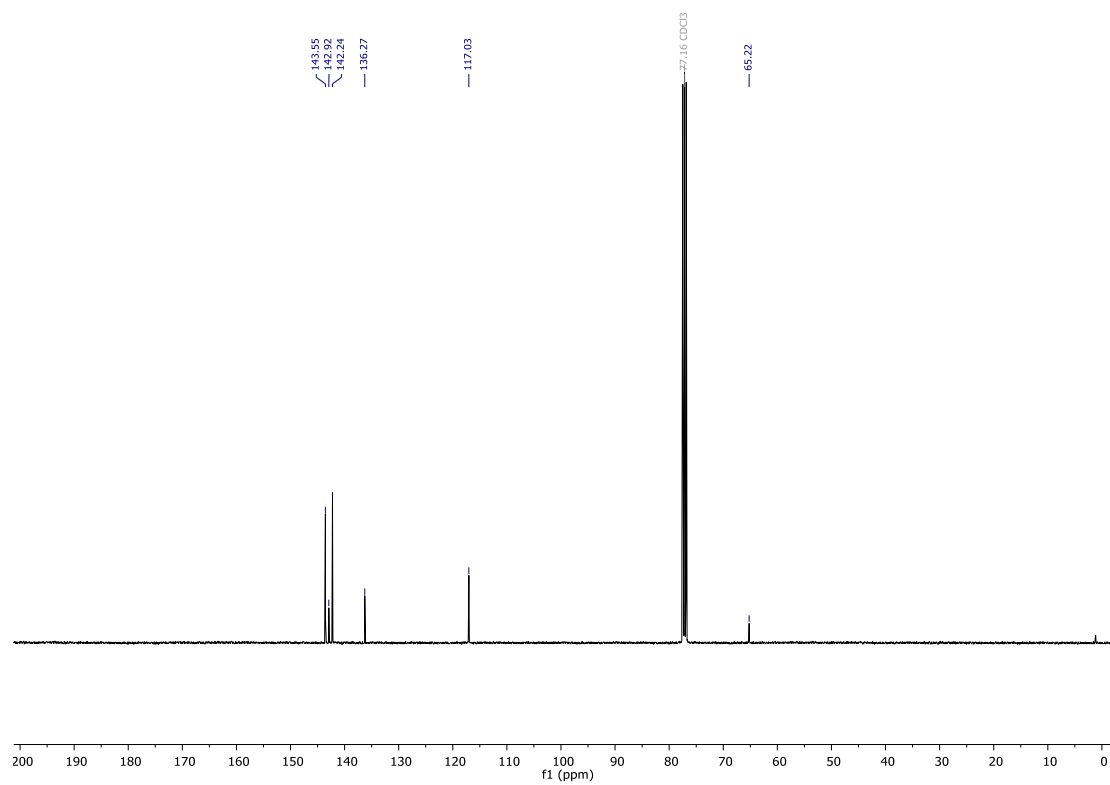

### 3-Allyl-6-chloroimidazo[1,2-a]pyrazine (7b)

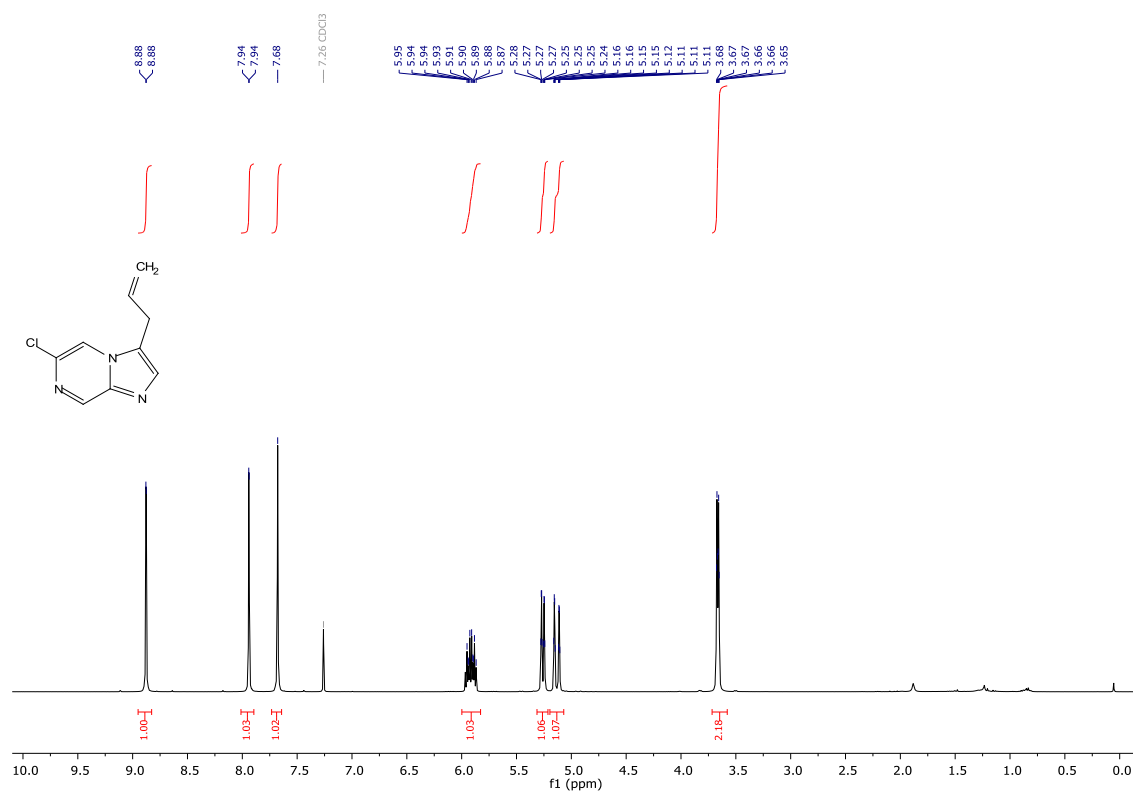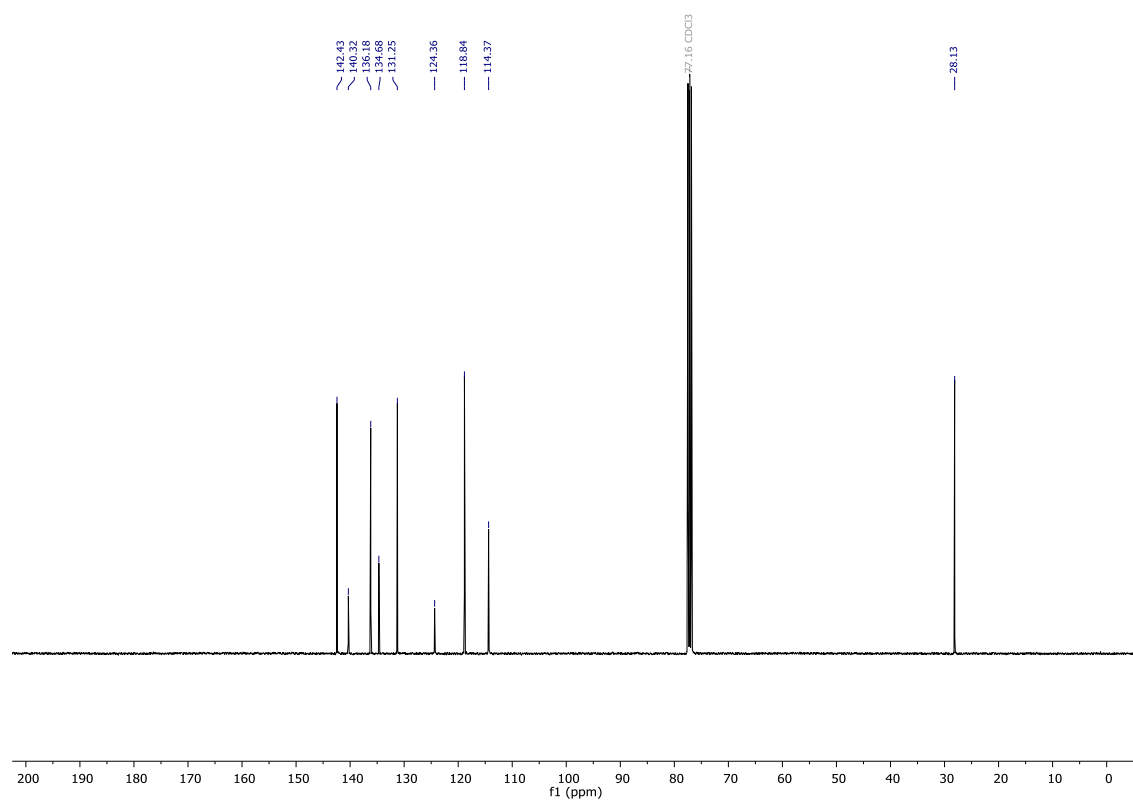

# 1-(6-Chloroimidazo[1,2-a]pyrazin-8-yl)-2,2-dimethylpropan-1-one (7c)

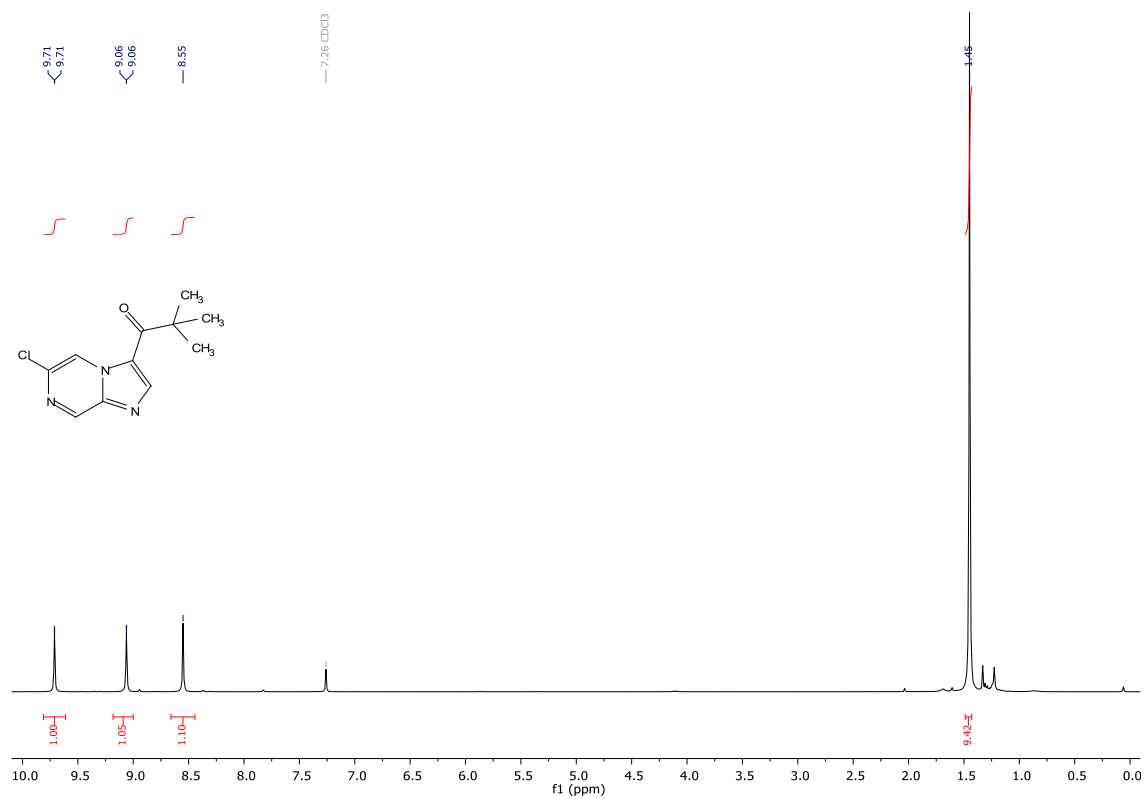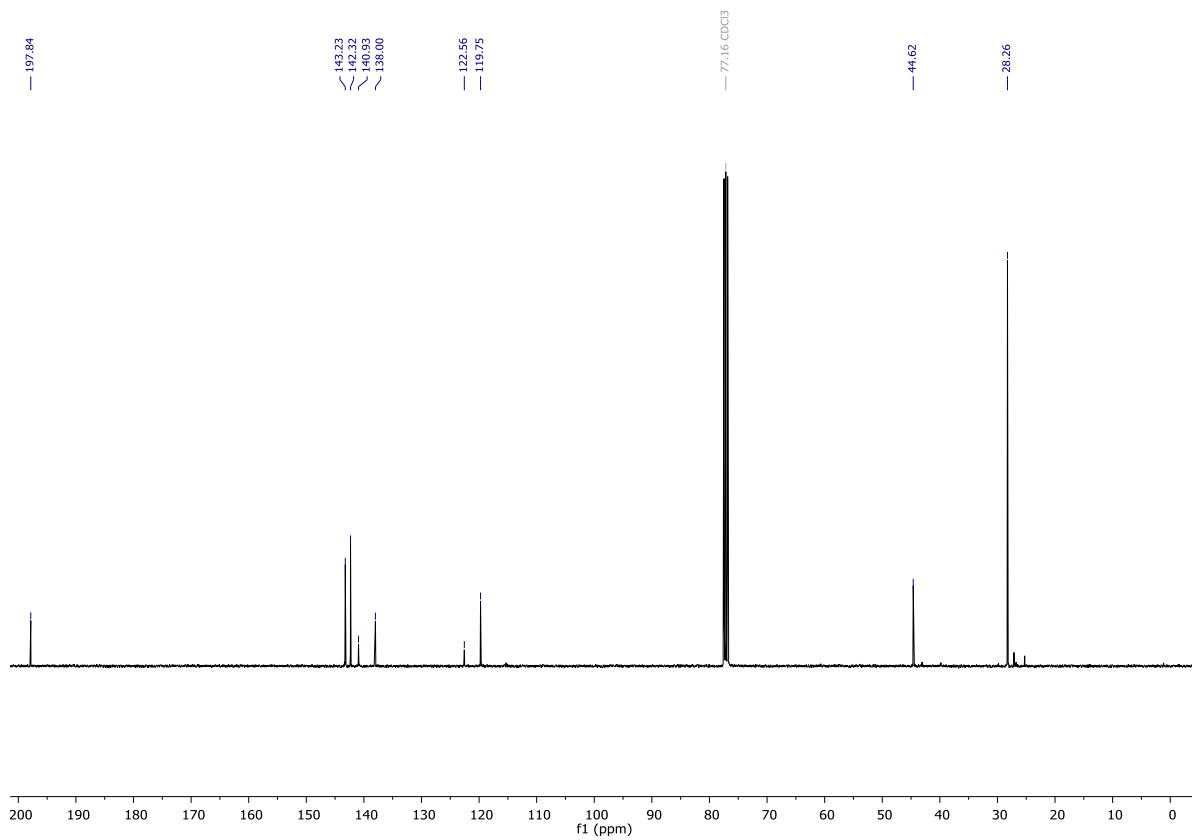



# 6-Chloroimidazo[1,2-a]pyrazine-8-carbonitrile (7e)

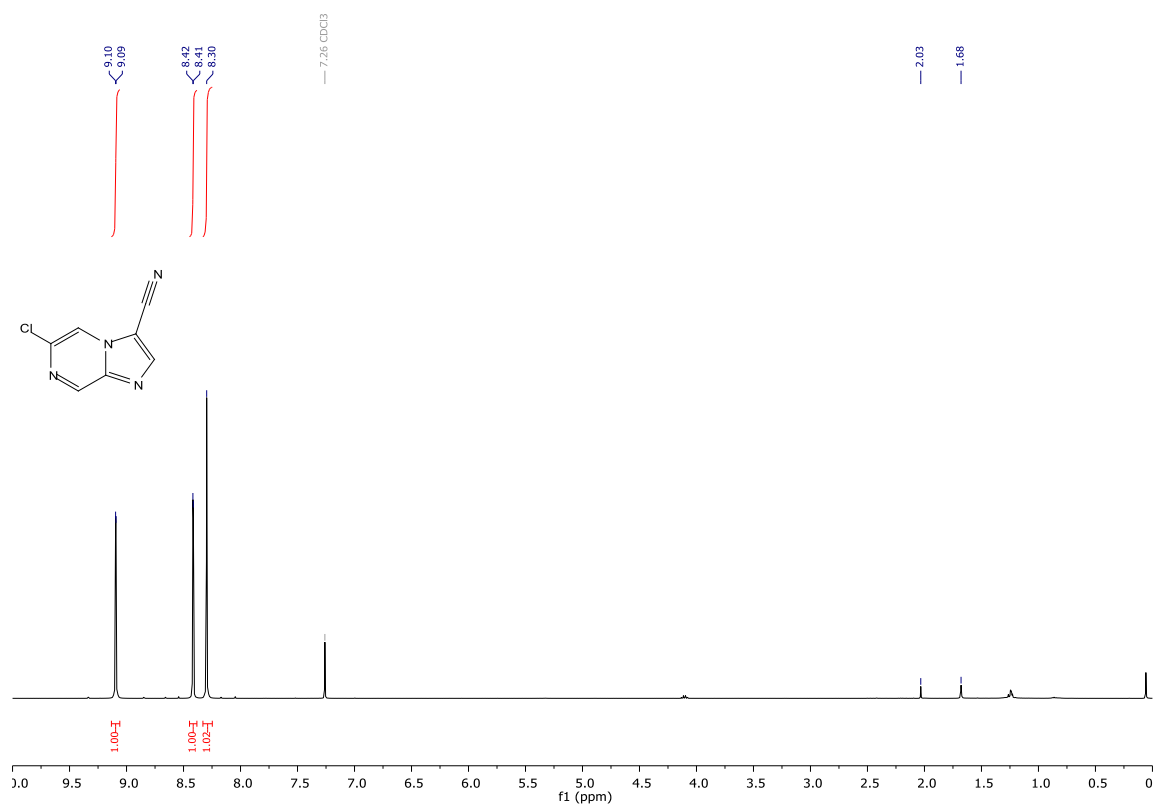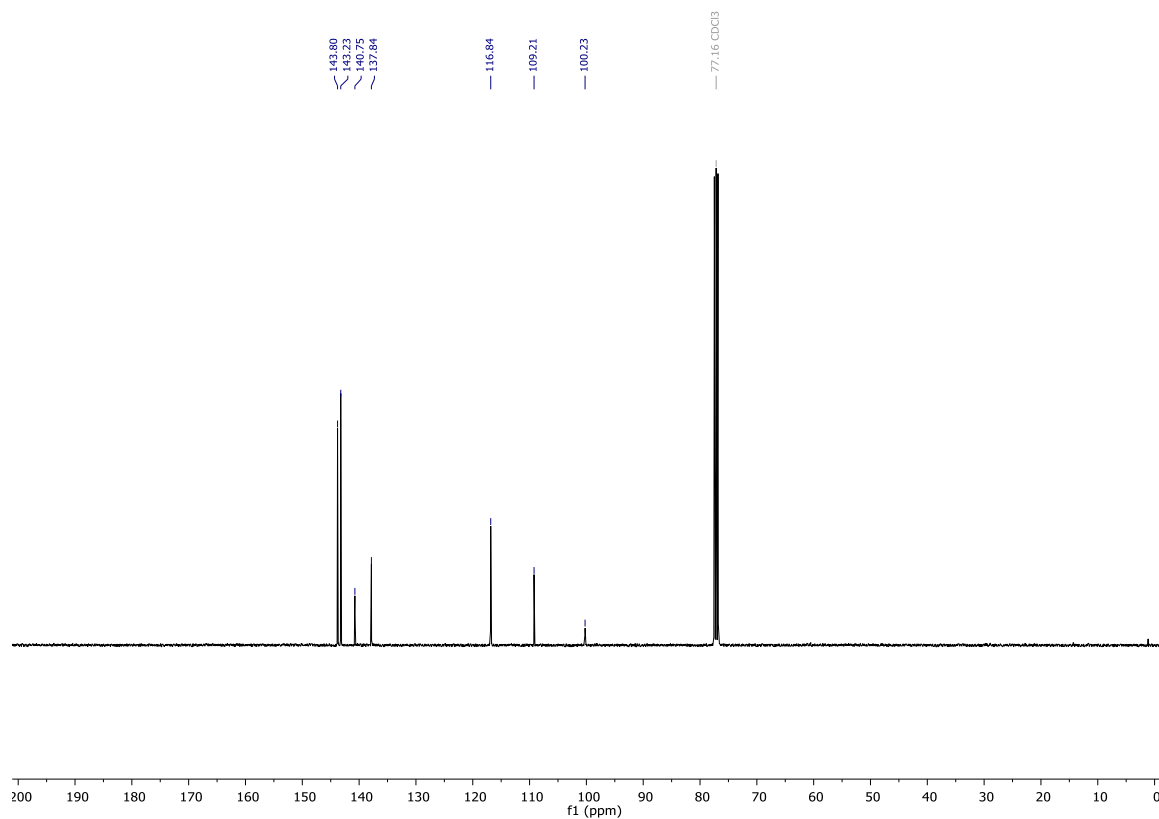

# Ethyl 6-chloroimidazo[1,2-a]pyrazine-8-carboxylate (7f)

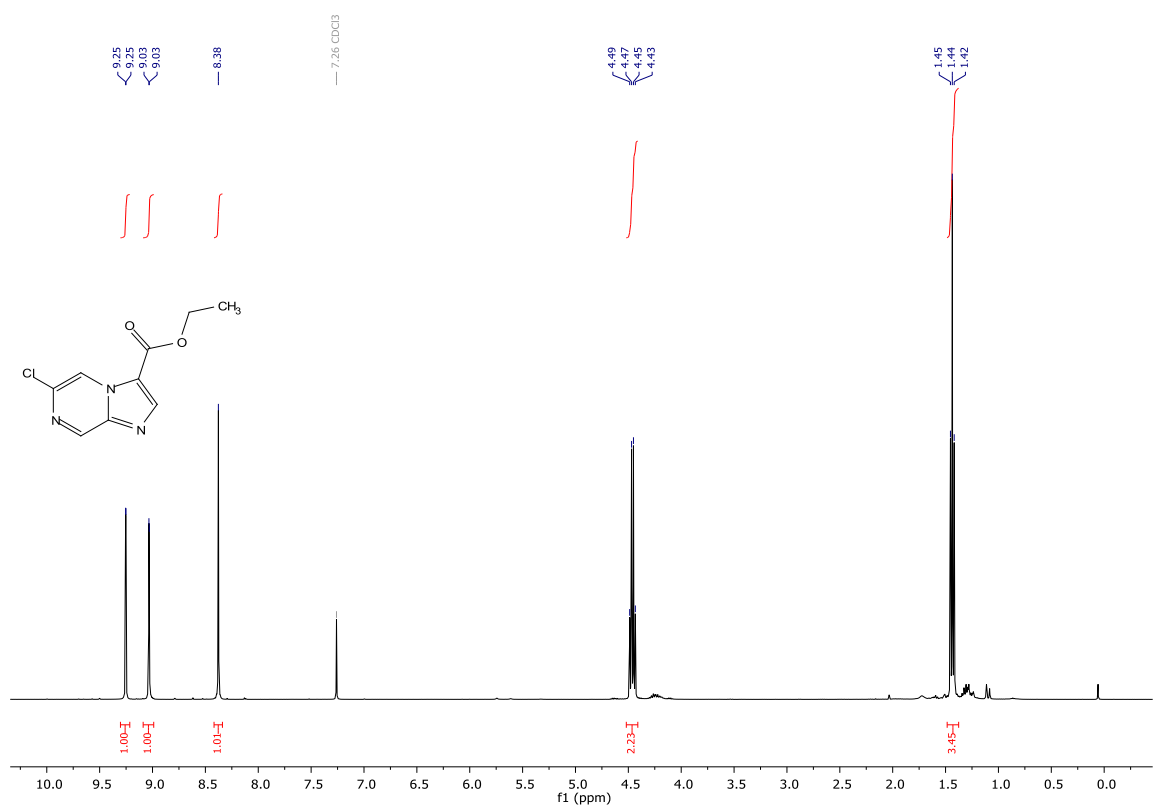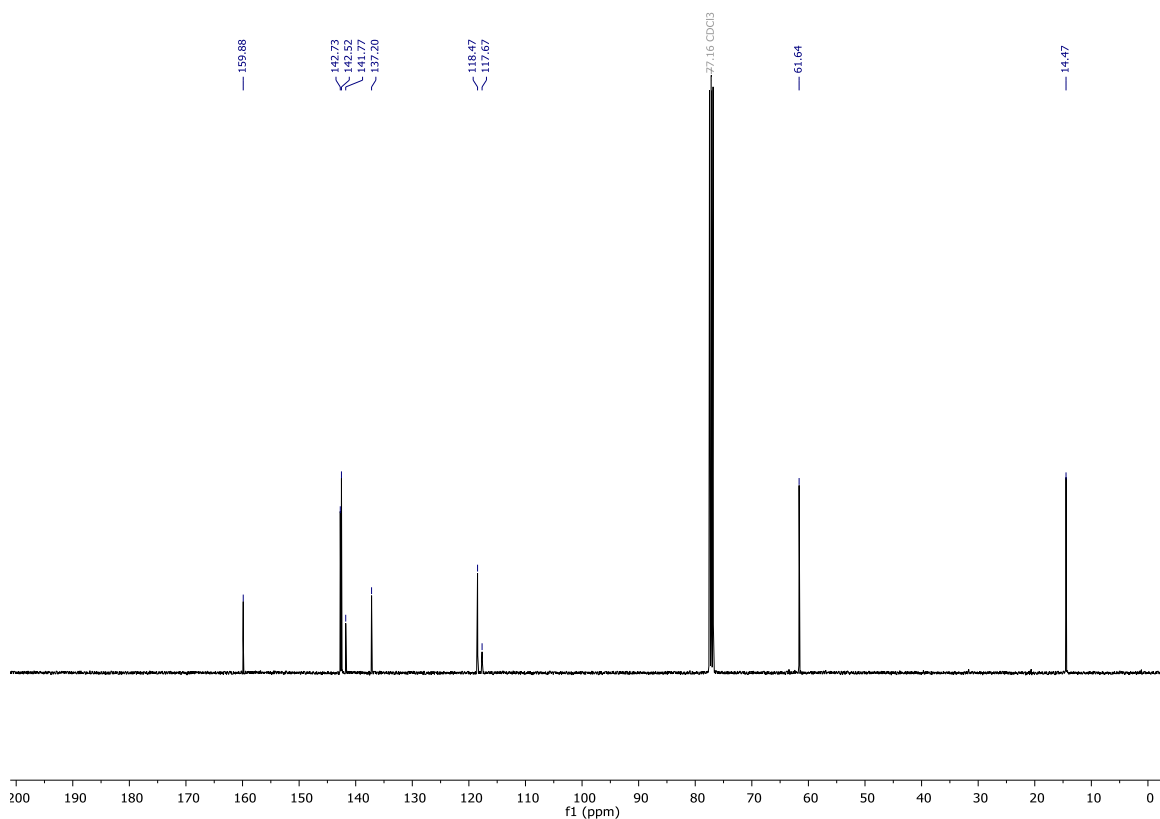

# 6-chloro-3-(phenylthio)imidazo[1,2-a]pyrazine (7g)

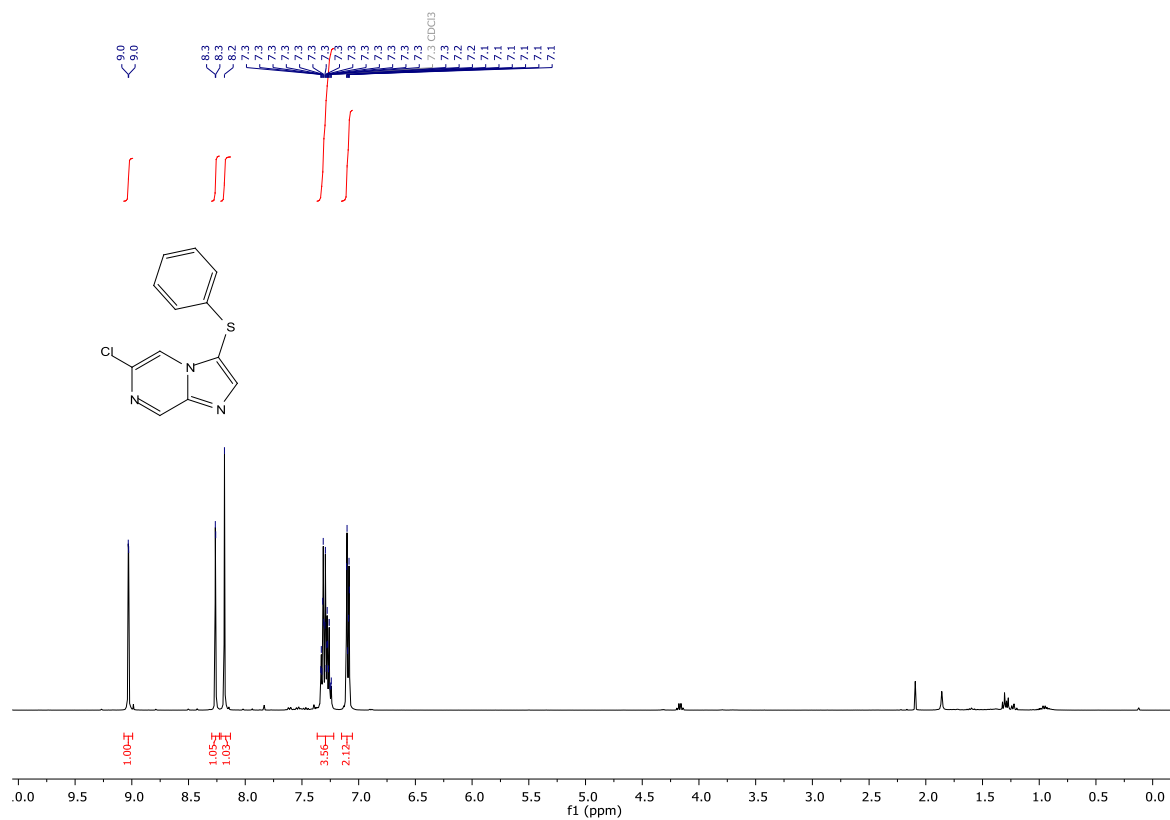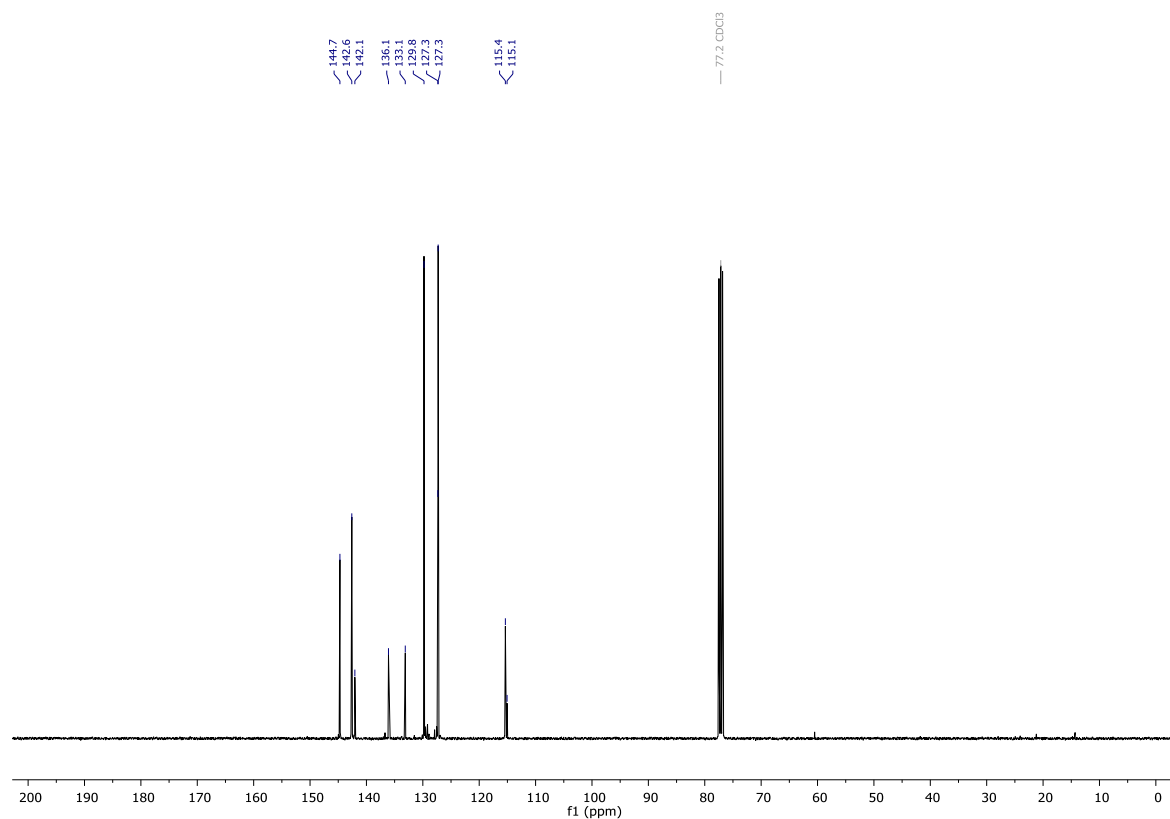

# 6-Chloro-5-iodoimidazo[1,2-a]pyrazine (8a)

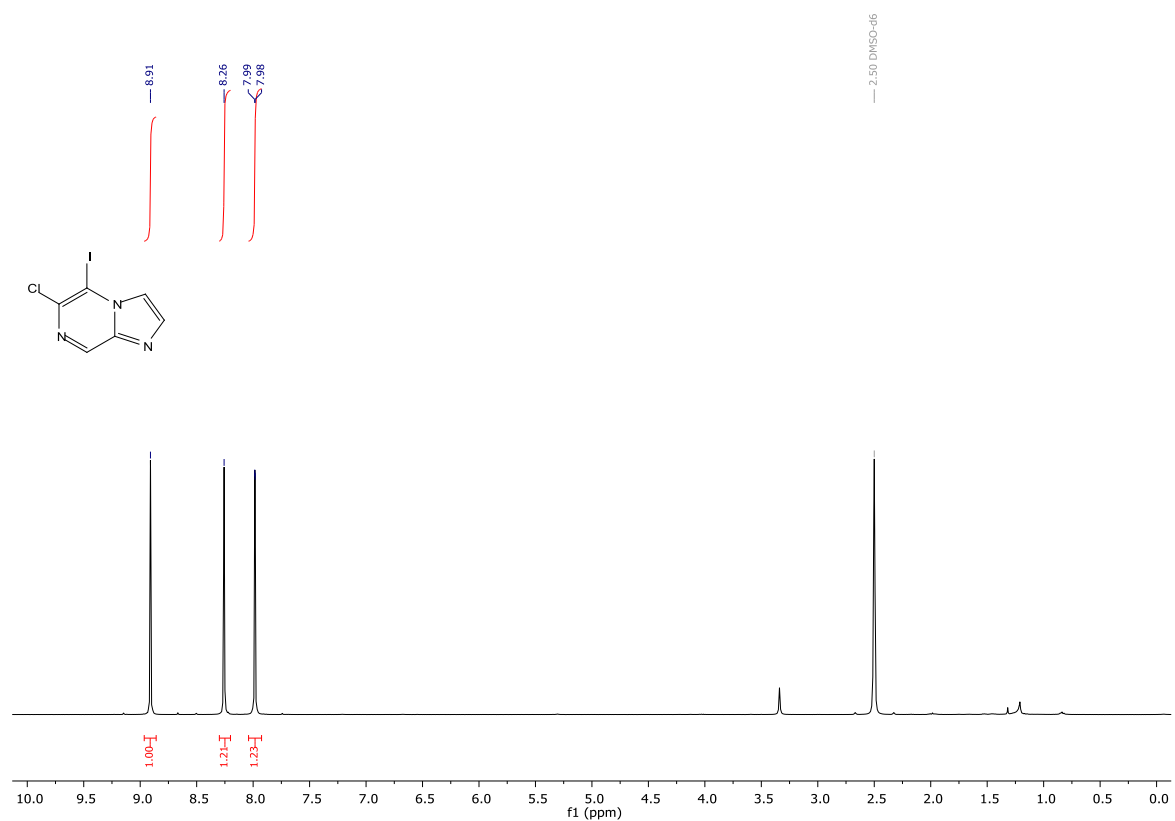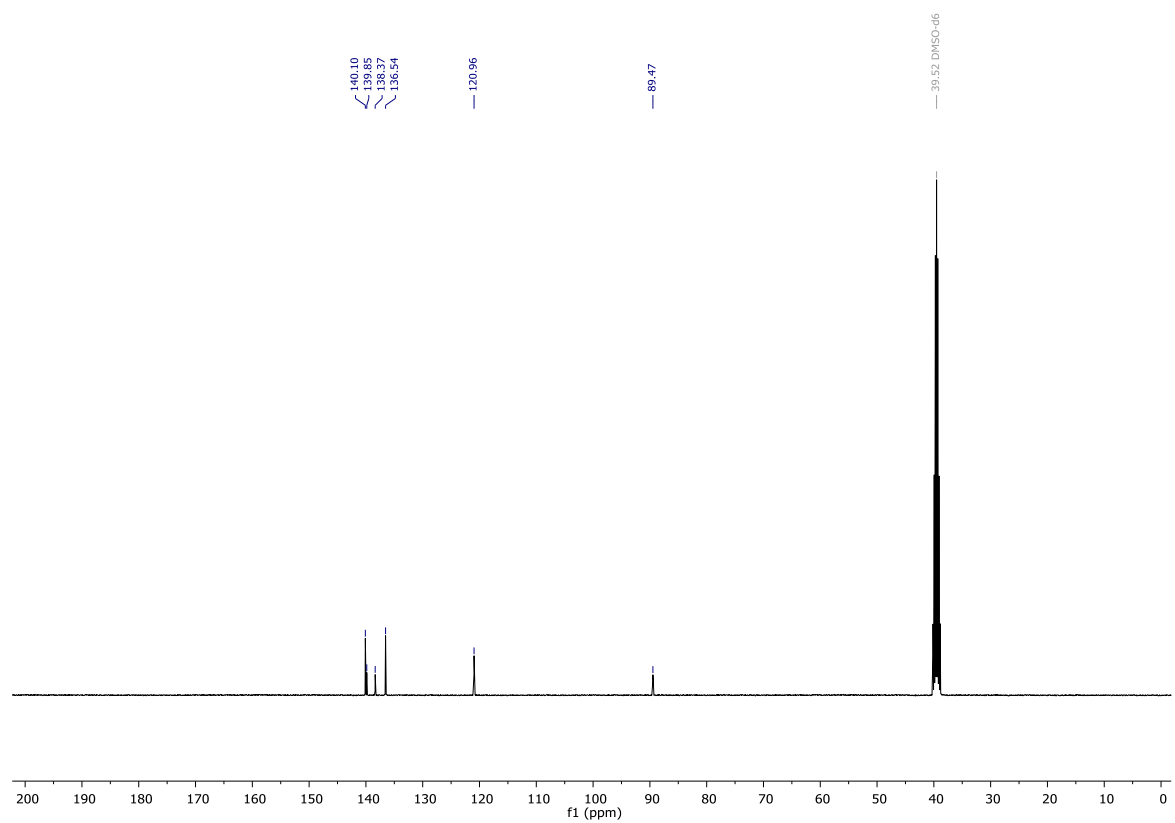



# 5-Allyl-6-chloroimidazo[1,2-a]pyrazine (8b)

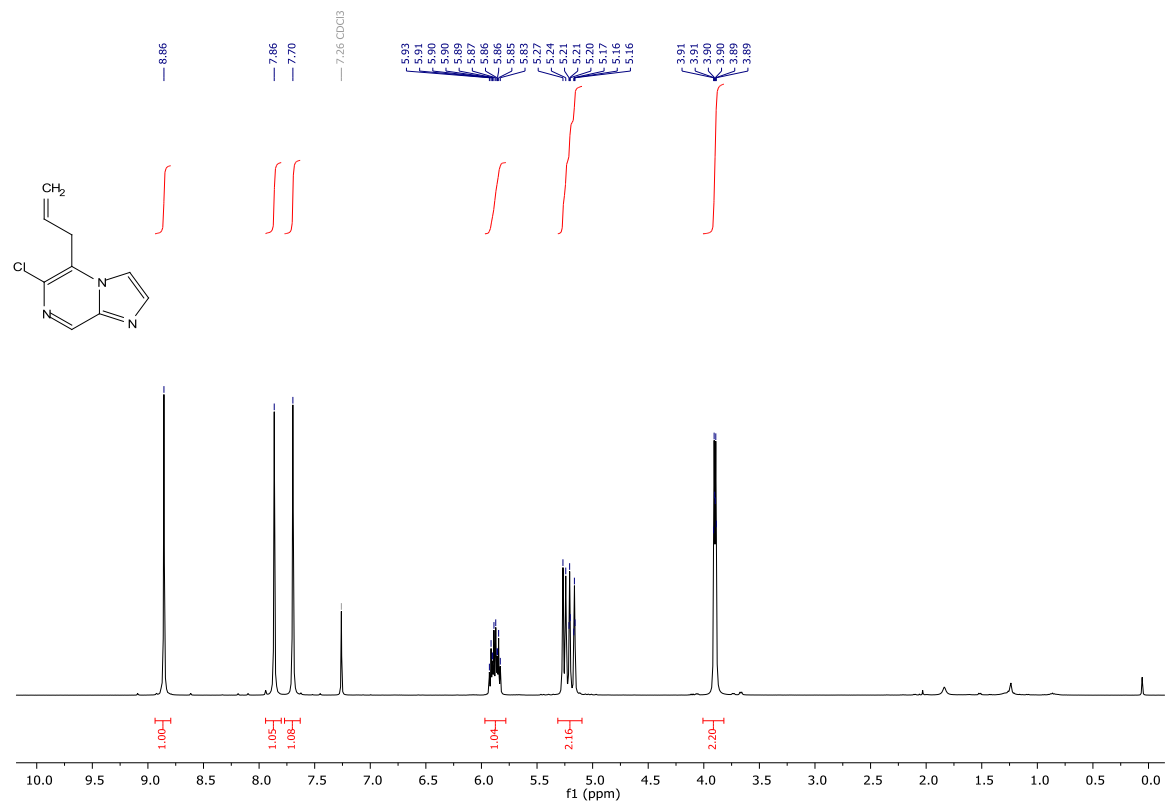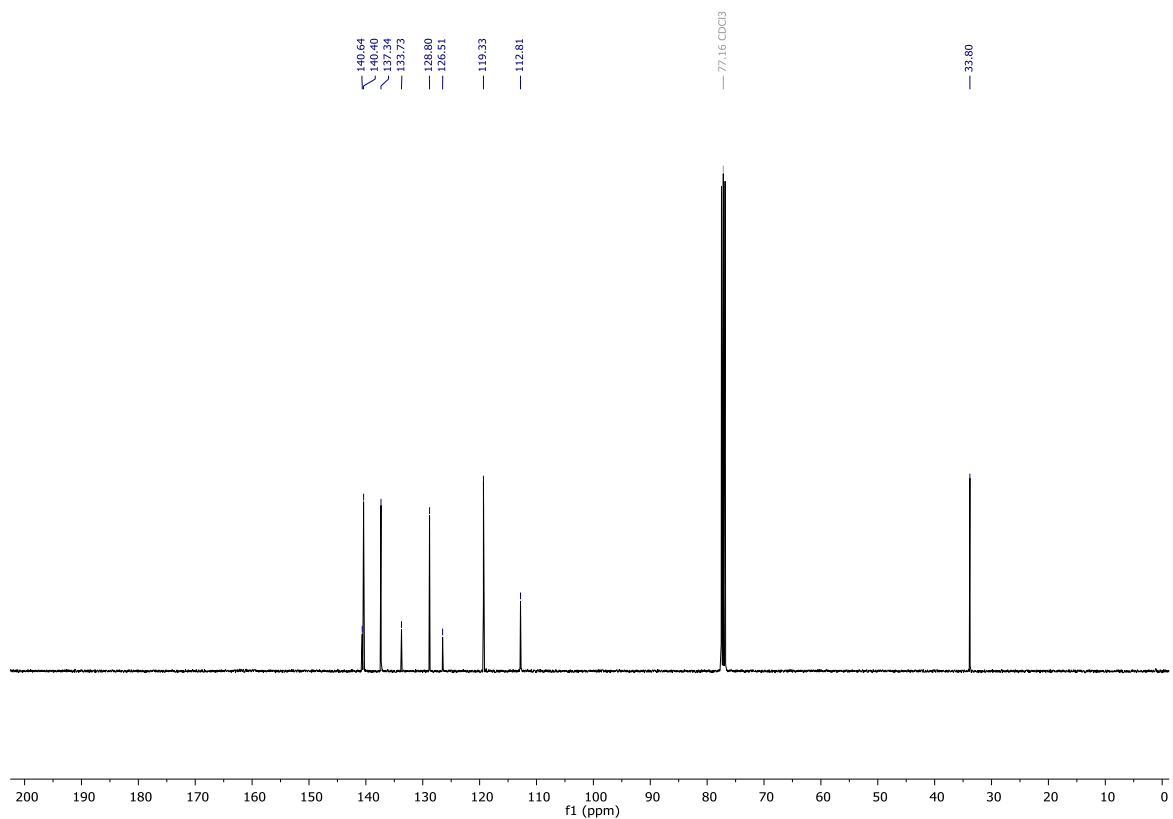

# 1-(6-Chloroimidazo[1,2-a]pyrazin-5-yl)-2,2-dimethylpropan-1-one (8c)

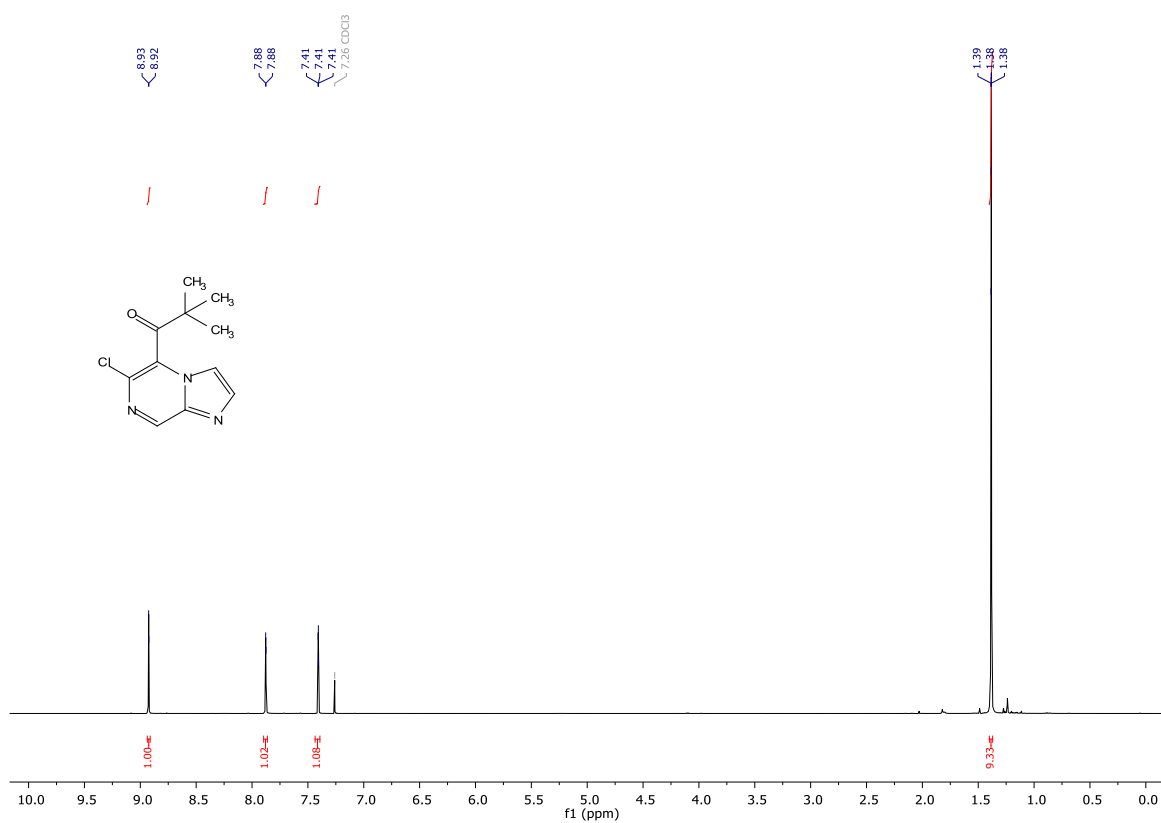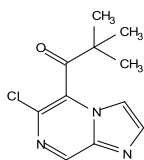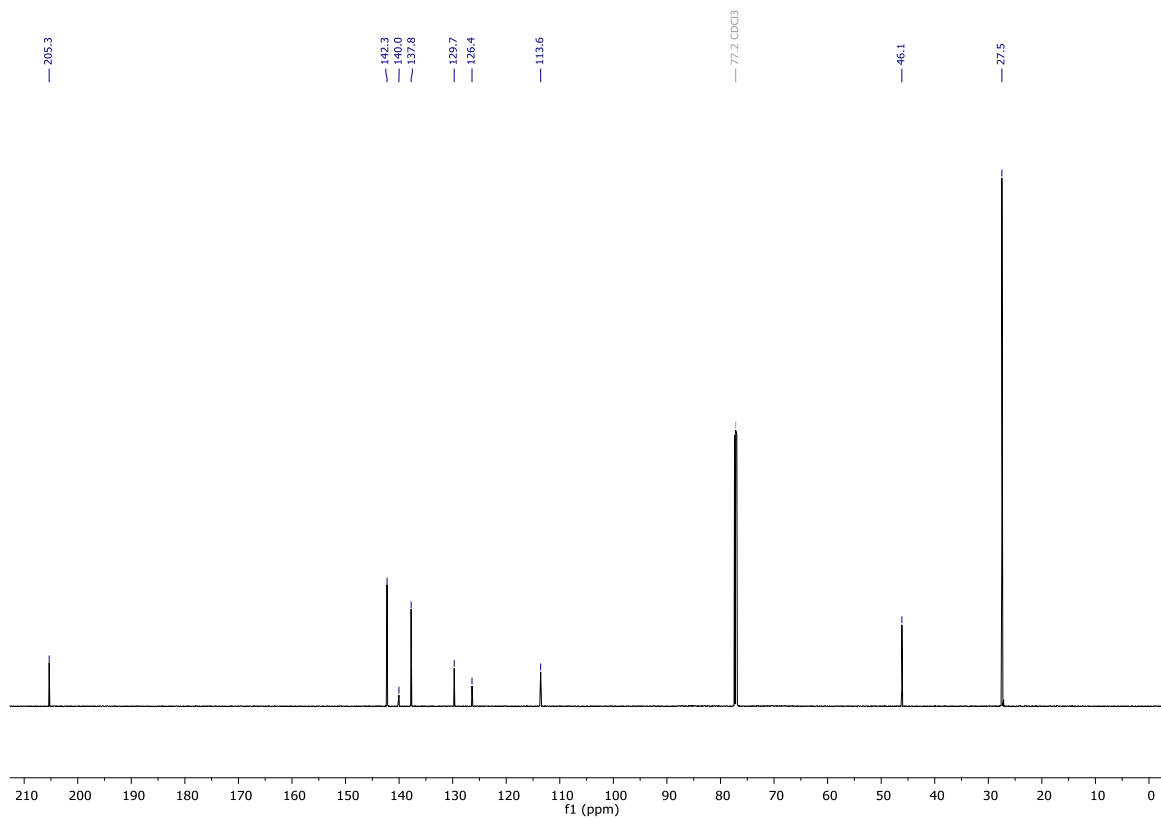

# (6-Chloroimidazo[1,2-a]pyrazin-5-yl)(3-chlorophenyl)methanone (8d)

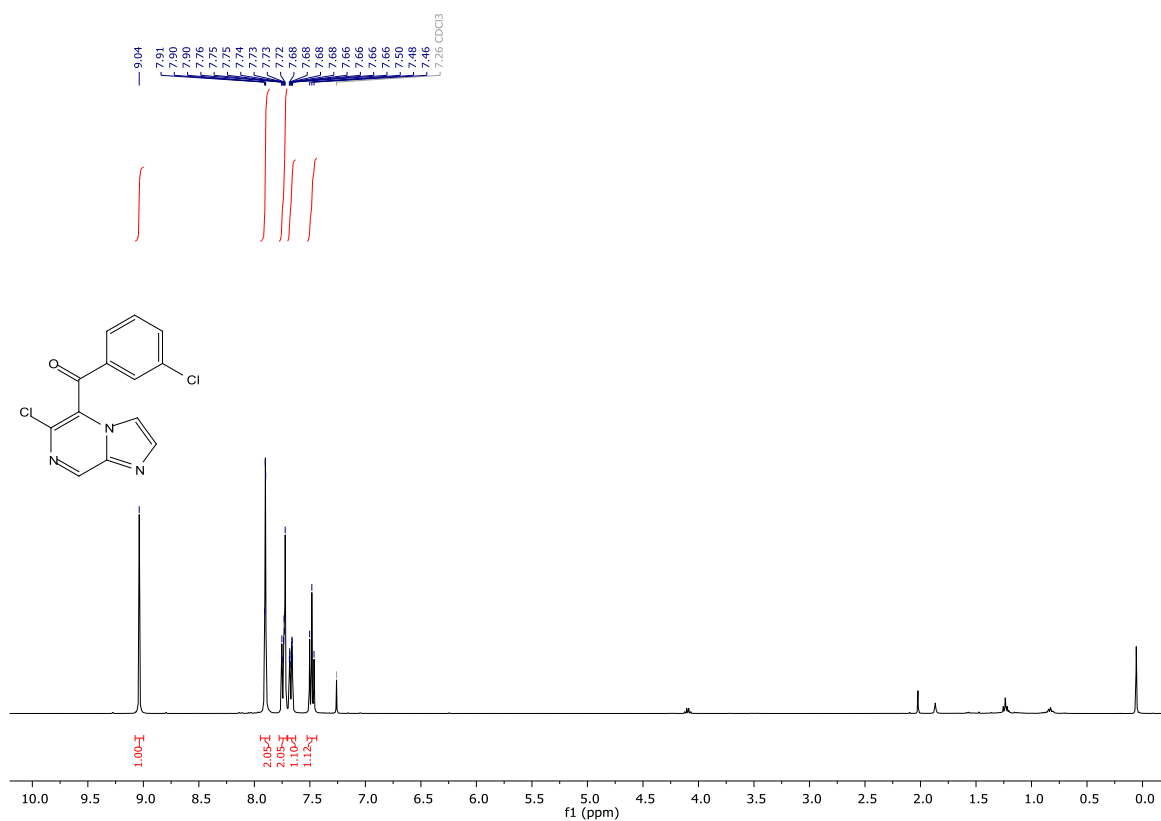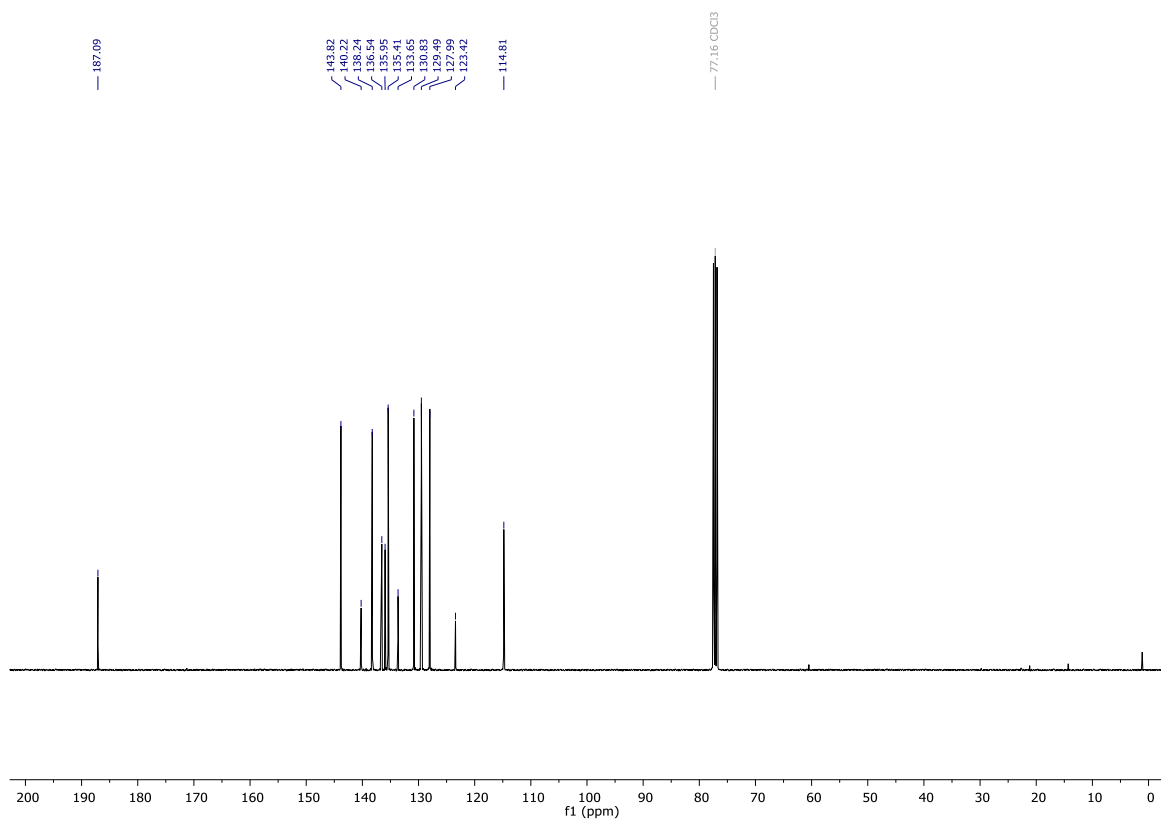

# Ethyl 4-(6-chloroimidazo[1,2-a]pyrazin-5-yl)benzoate (8e)

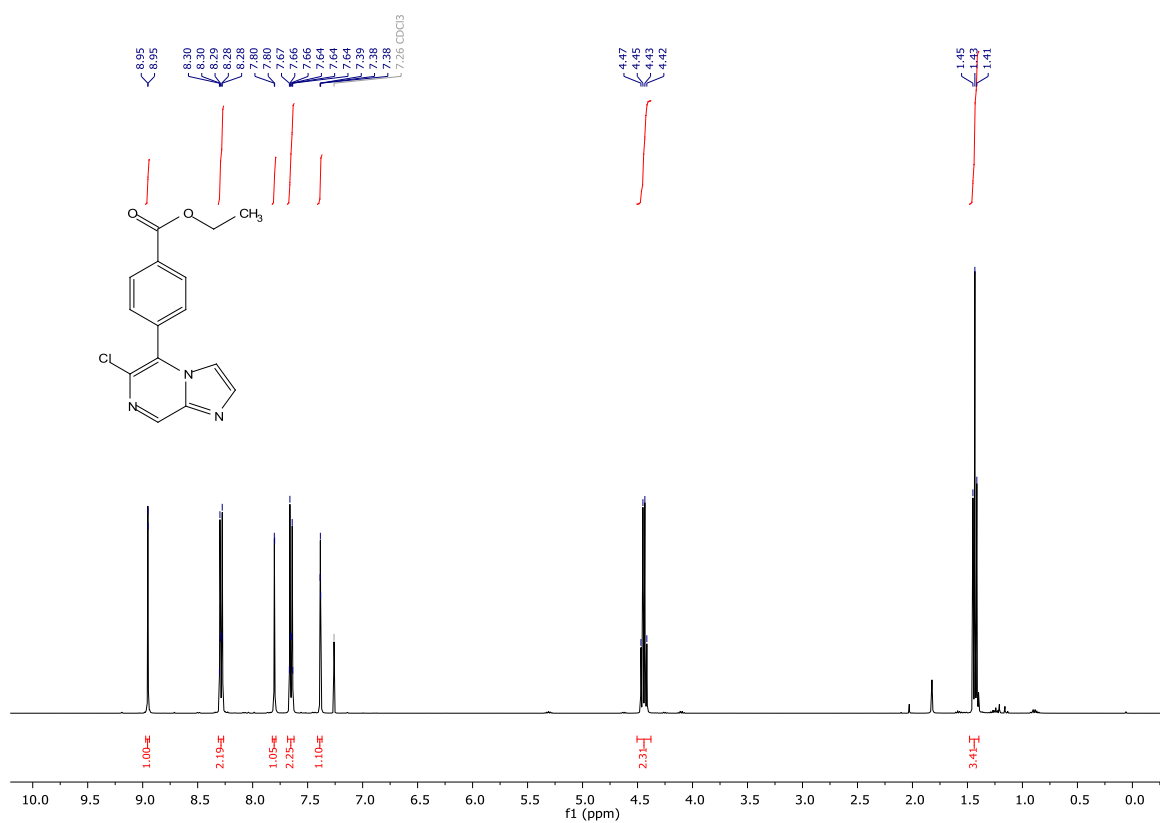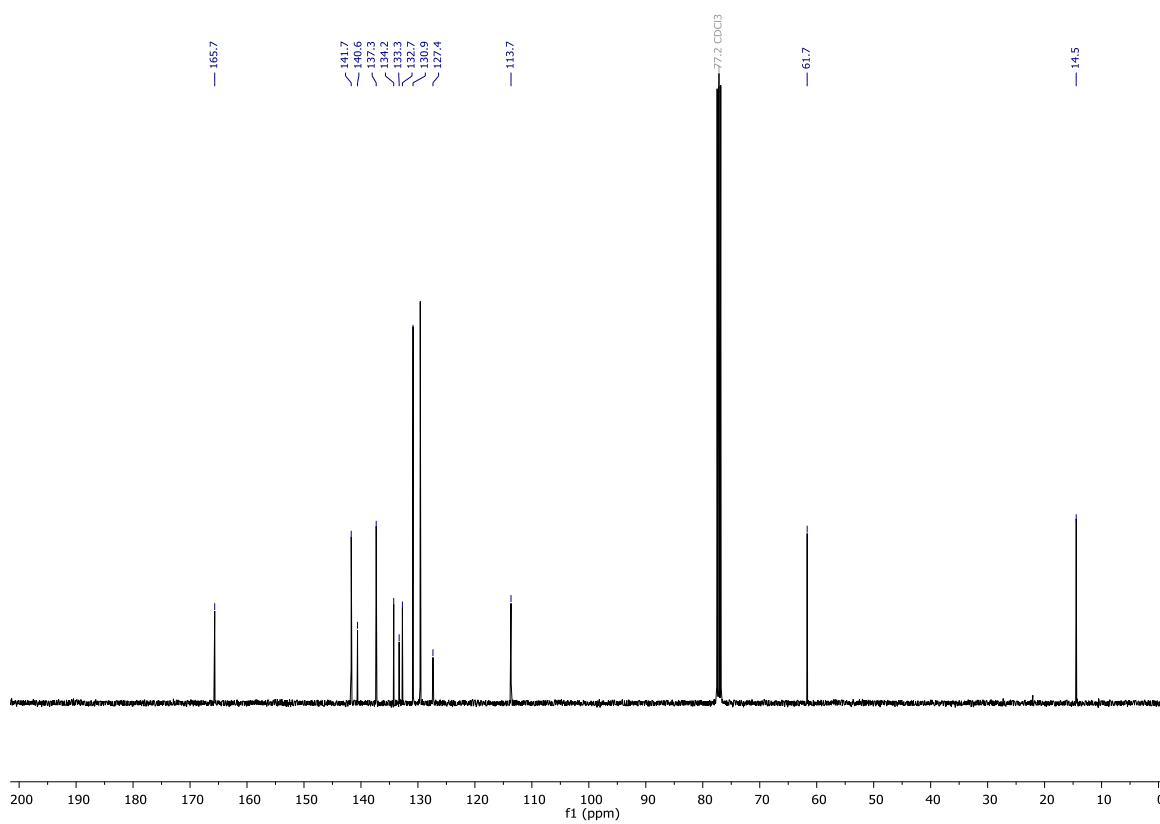

# 6-Chloro-5-(4-methoxyphenyl)imidazo[1,2-a]pyrazine (8f)

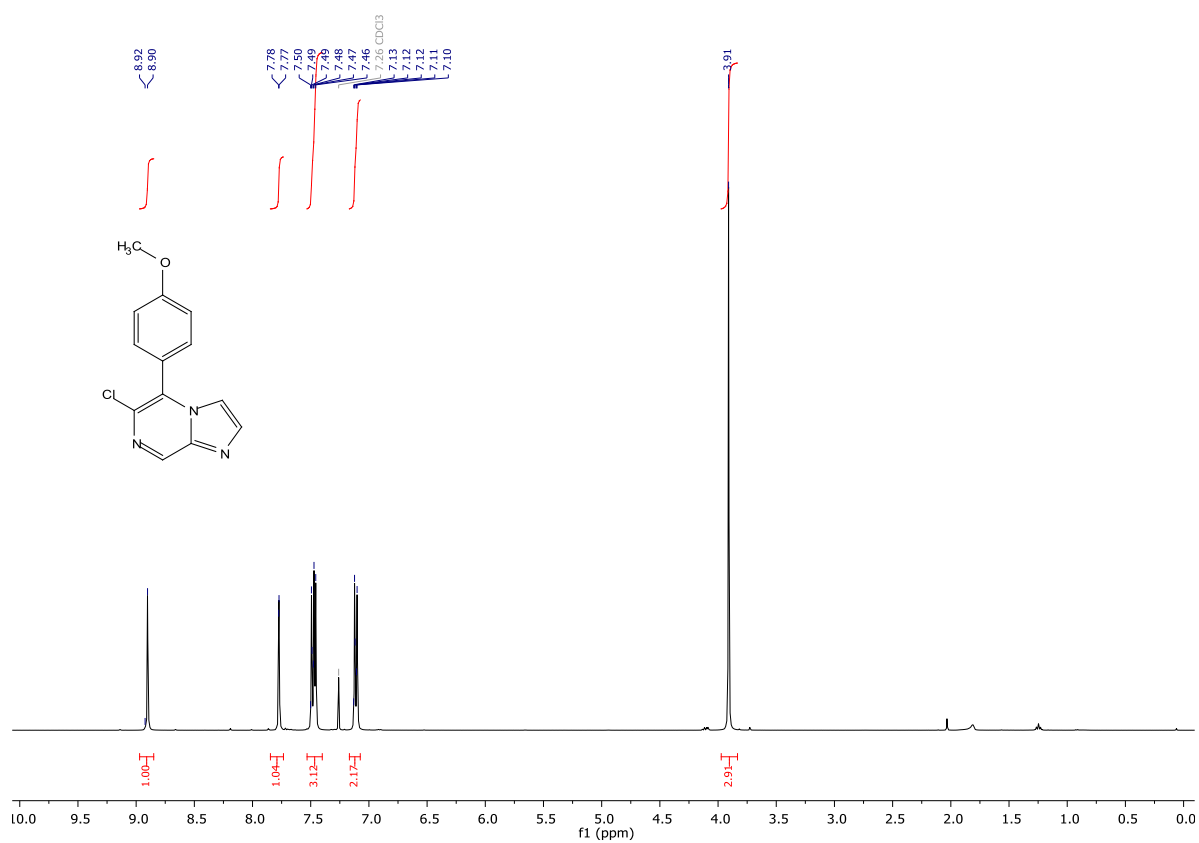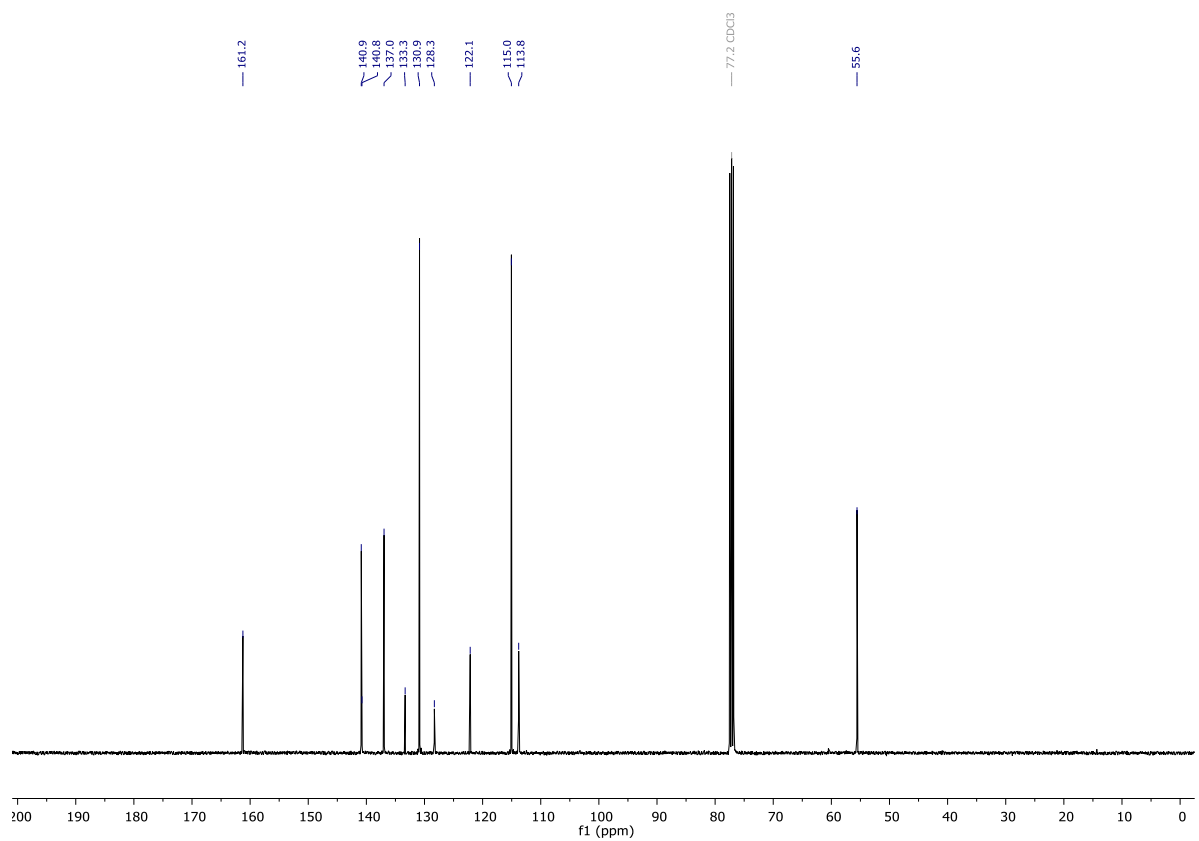

# 6-Chloro-5-(3,4,5-trimethoxyphenyl)imidazo[1,2-a]pyrazine (8g)

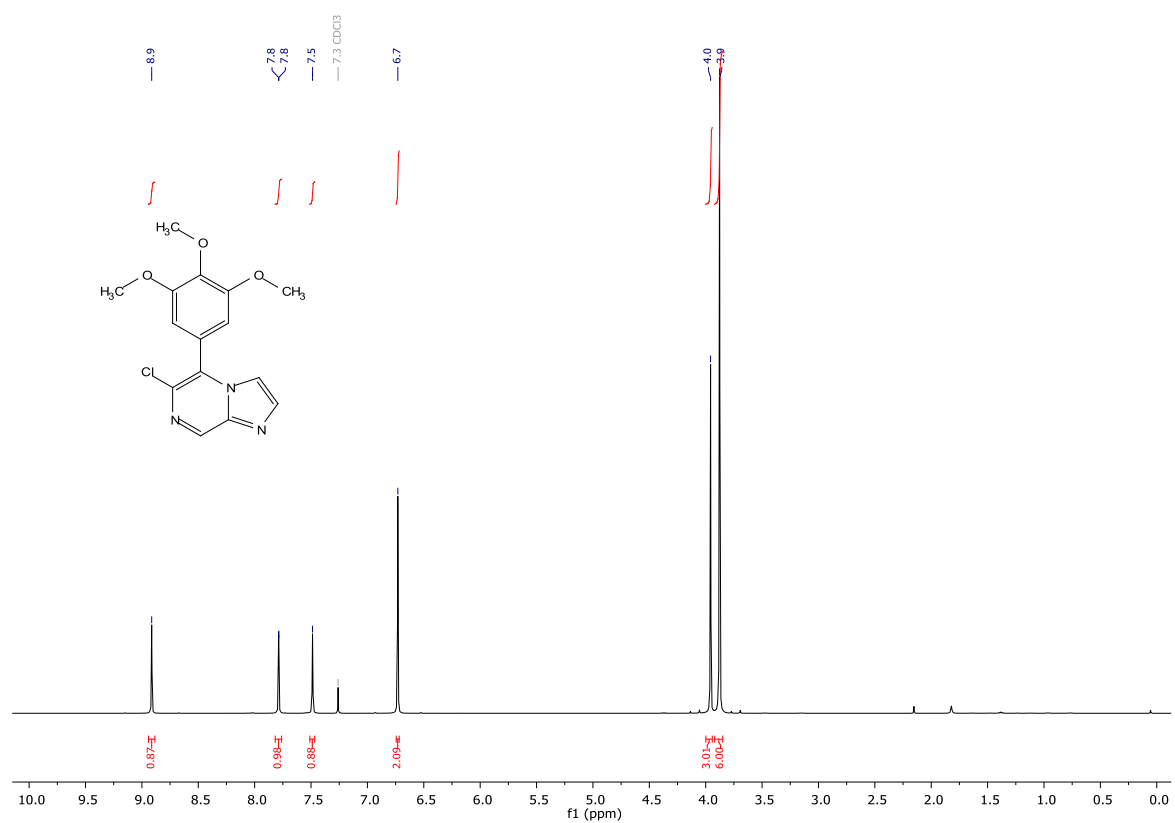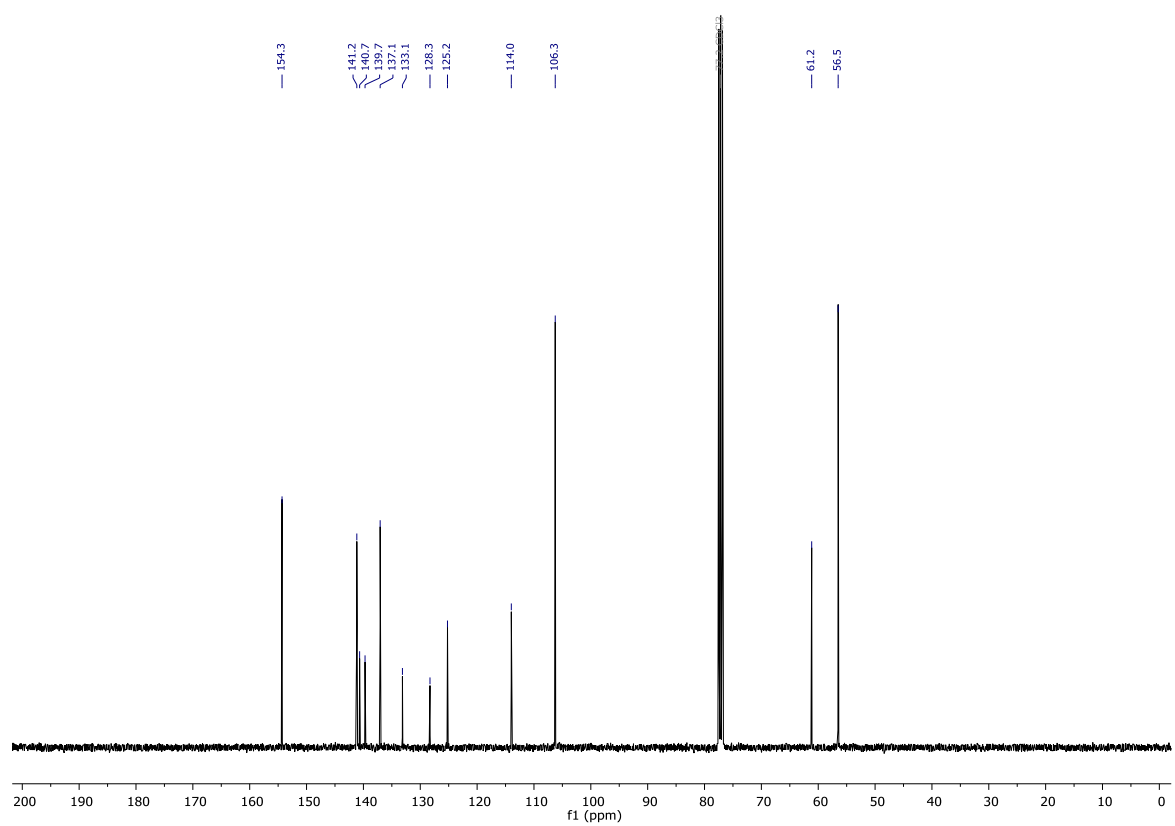

# 6-Chloro-2-iodoimidazo[1,2-a]pyrazine-3-carbonitrile (16a)

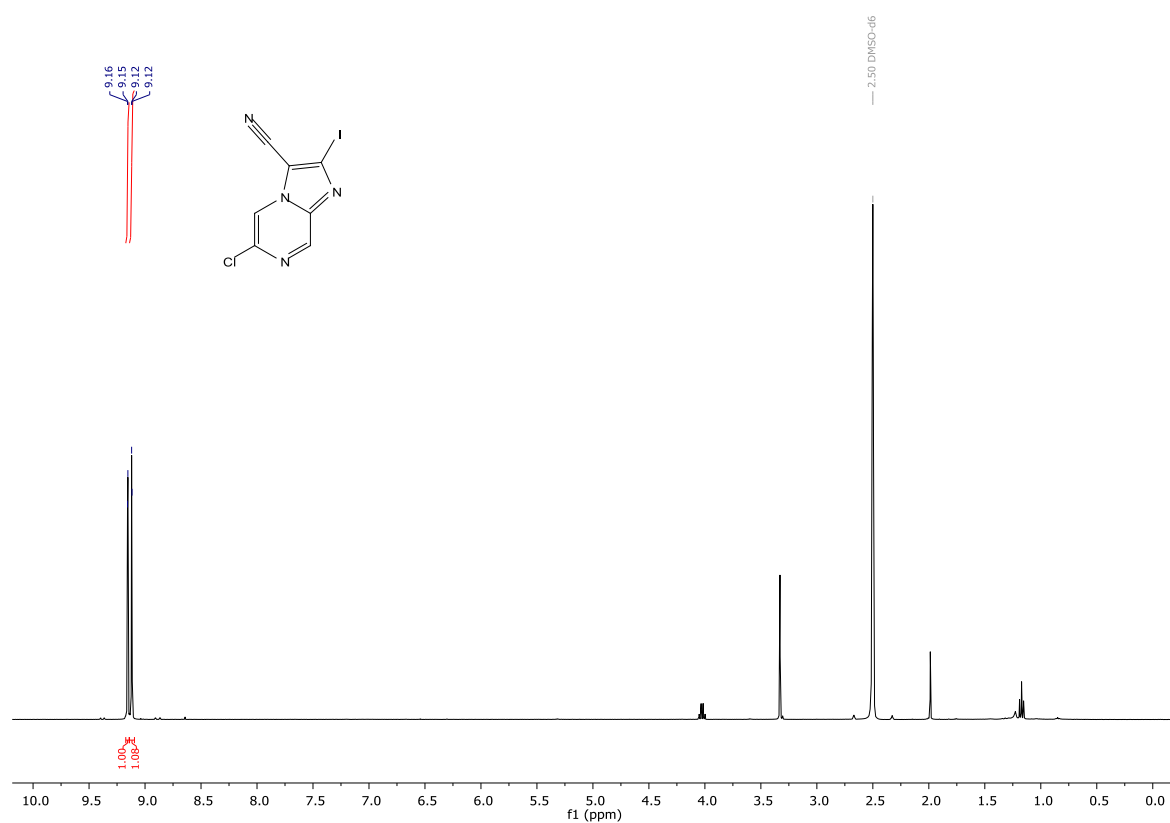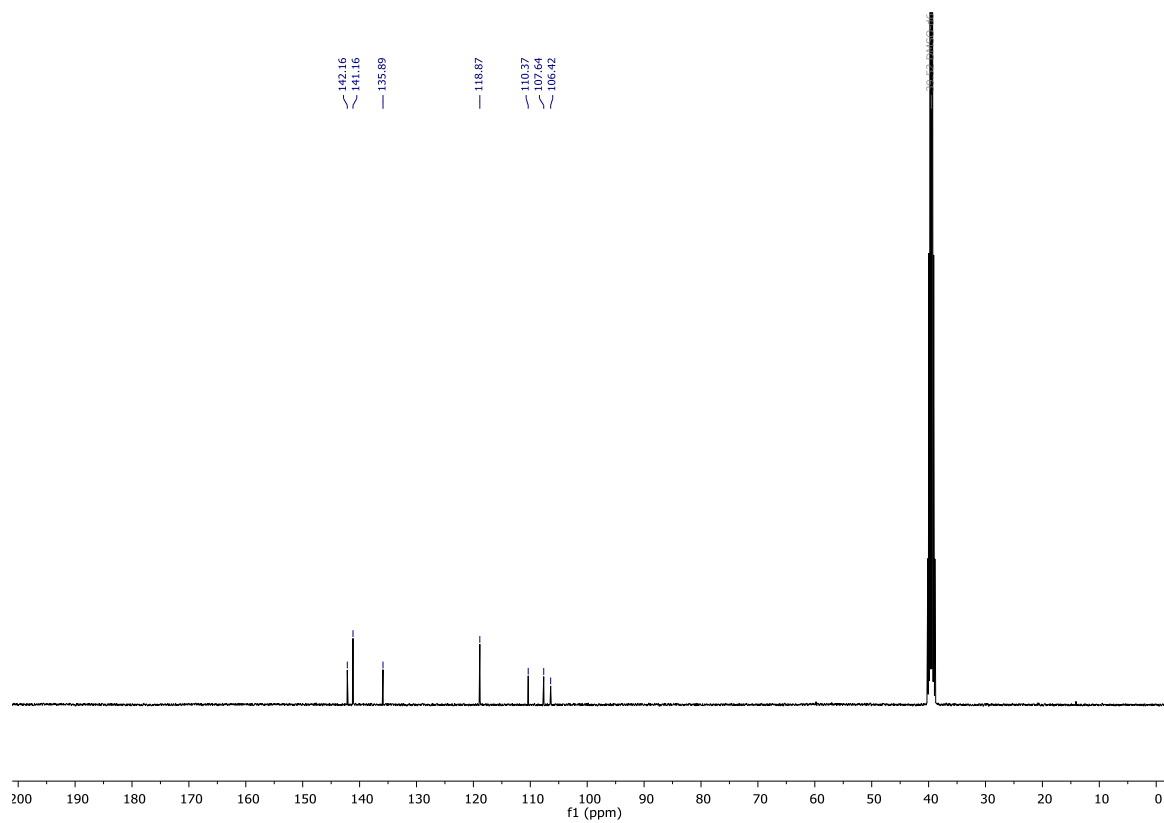

## 2-Allyl-6-chloroimidazo[1,2-a]pyrazine-3-carbonitrile (16b)

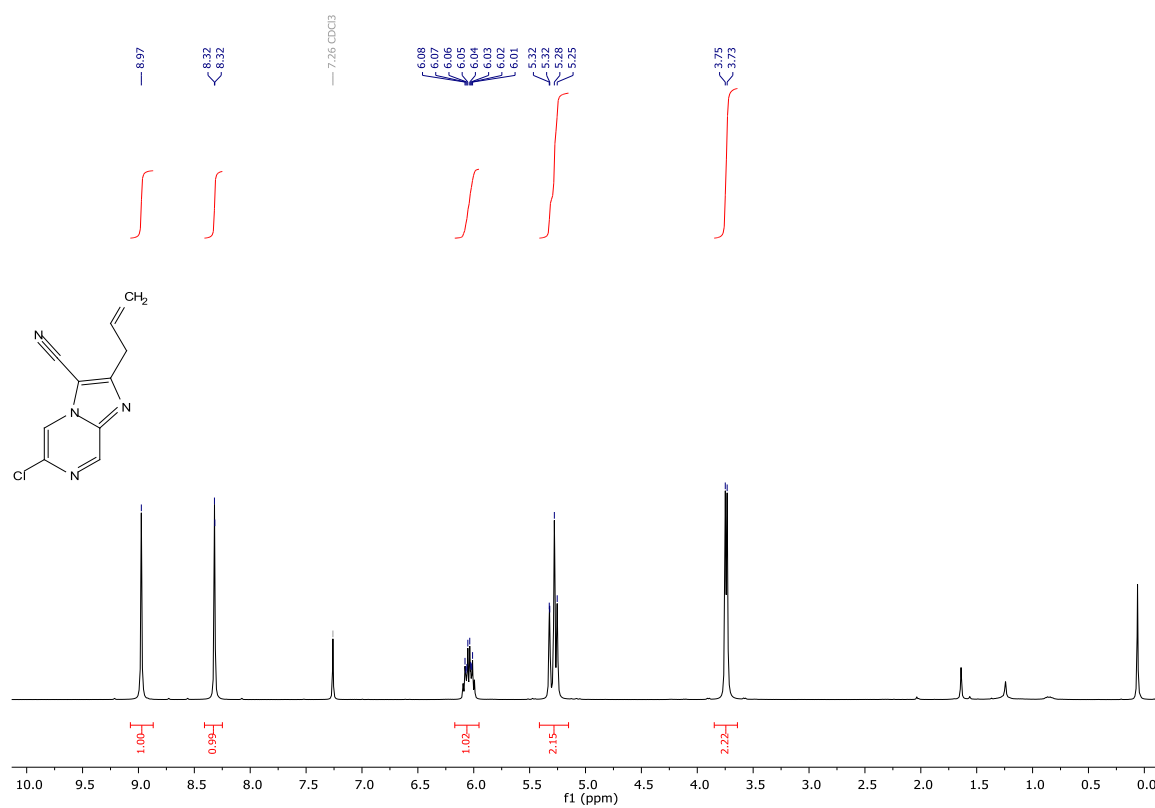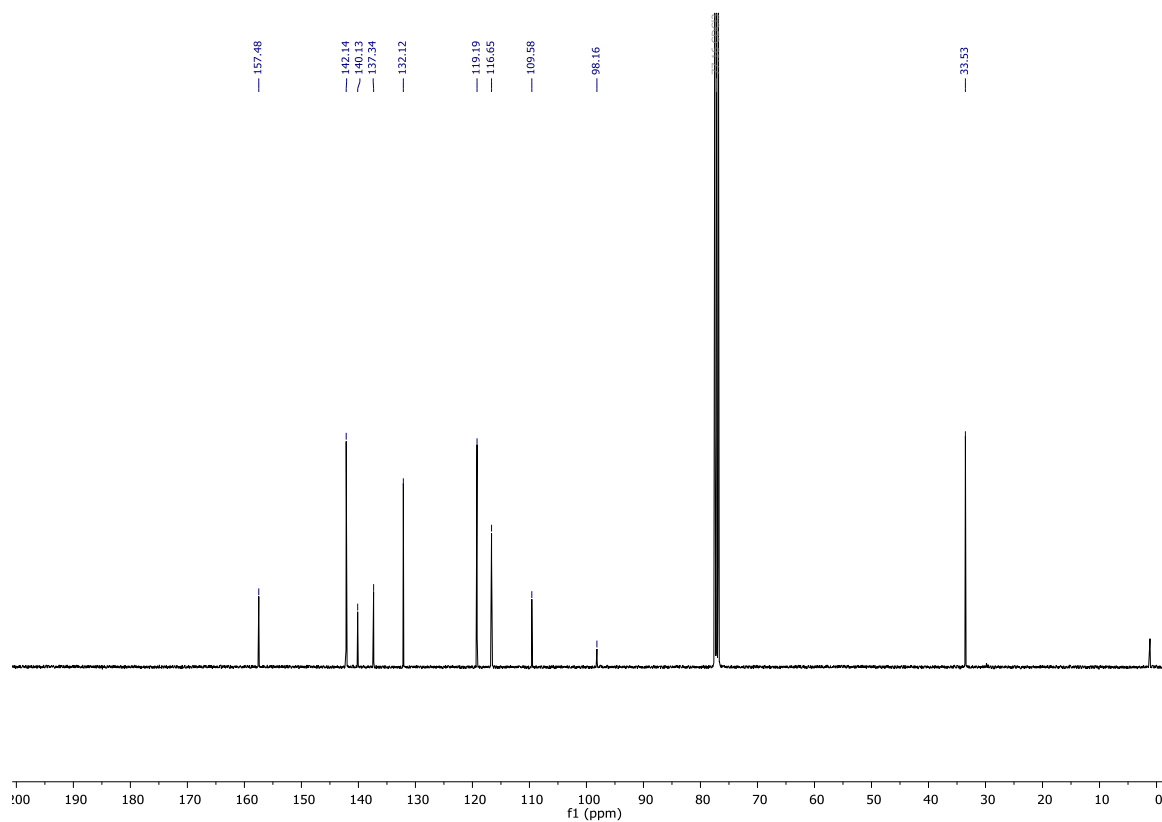



# 6-Chloro-2-pivaloylimidazo[1,2-a]pyrazine-3-carbonitrile (16c)

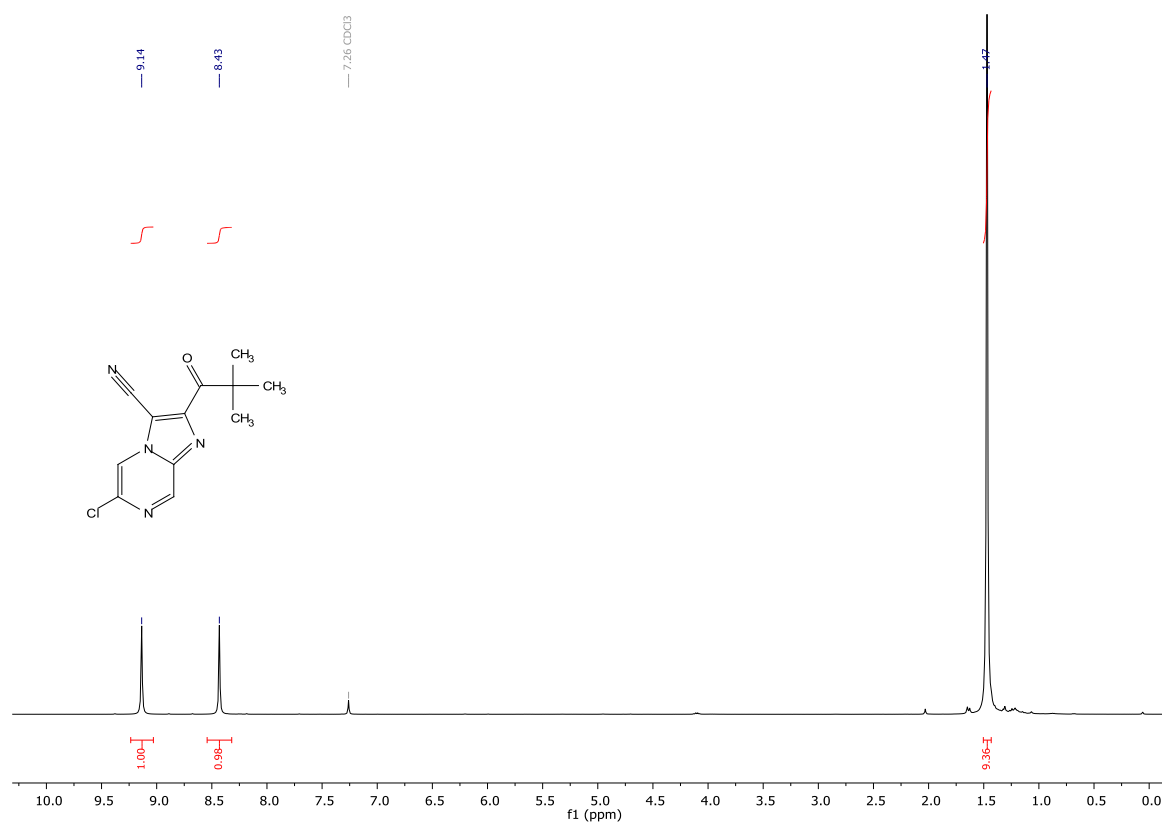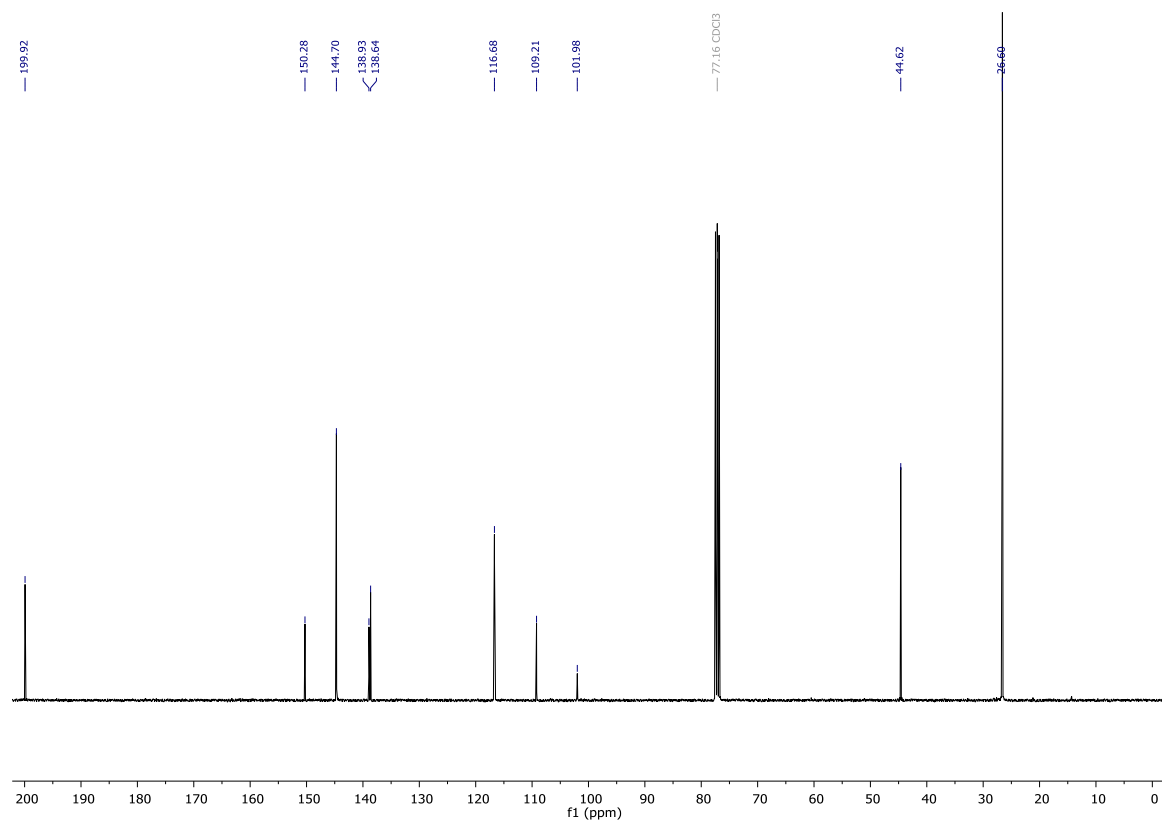

# Ethyl 4-(6-chloro-3-cyanoimidazo[1,2-a]pyrazin-2-yl)benzoate (16d)

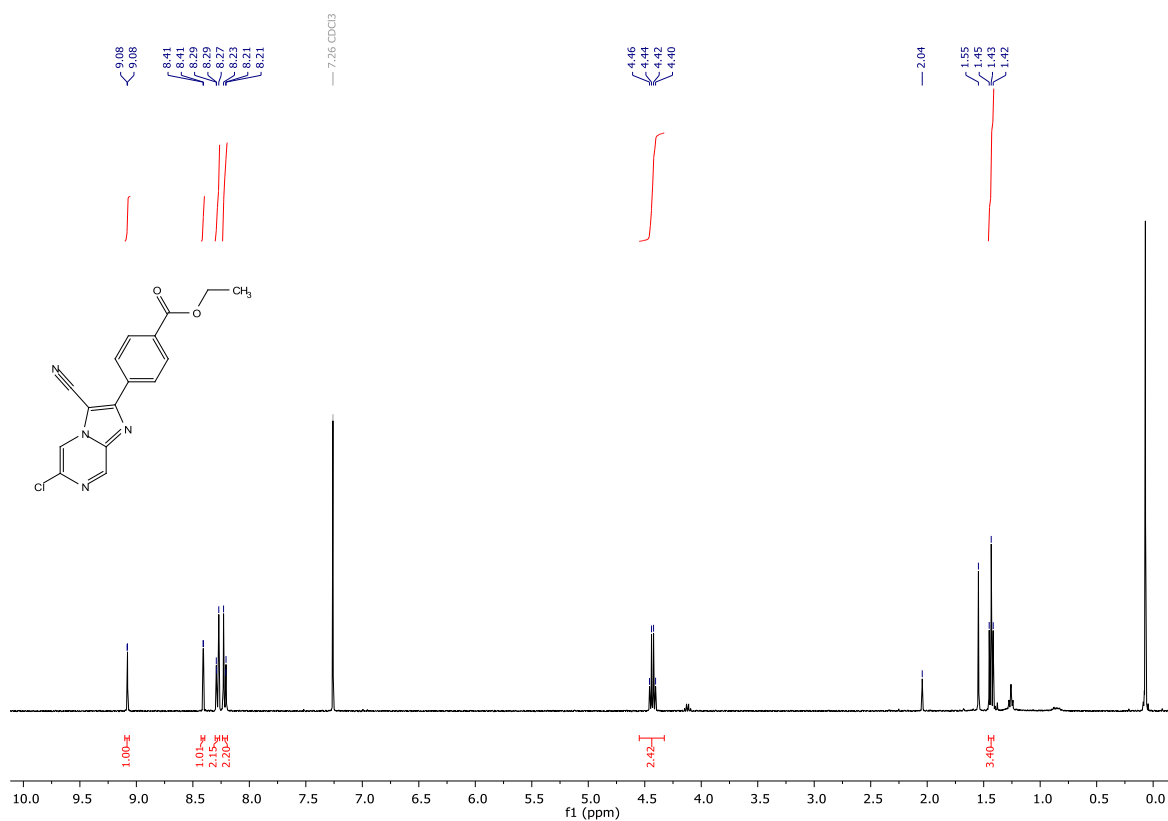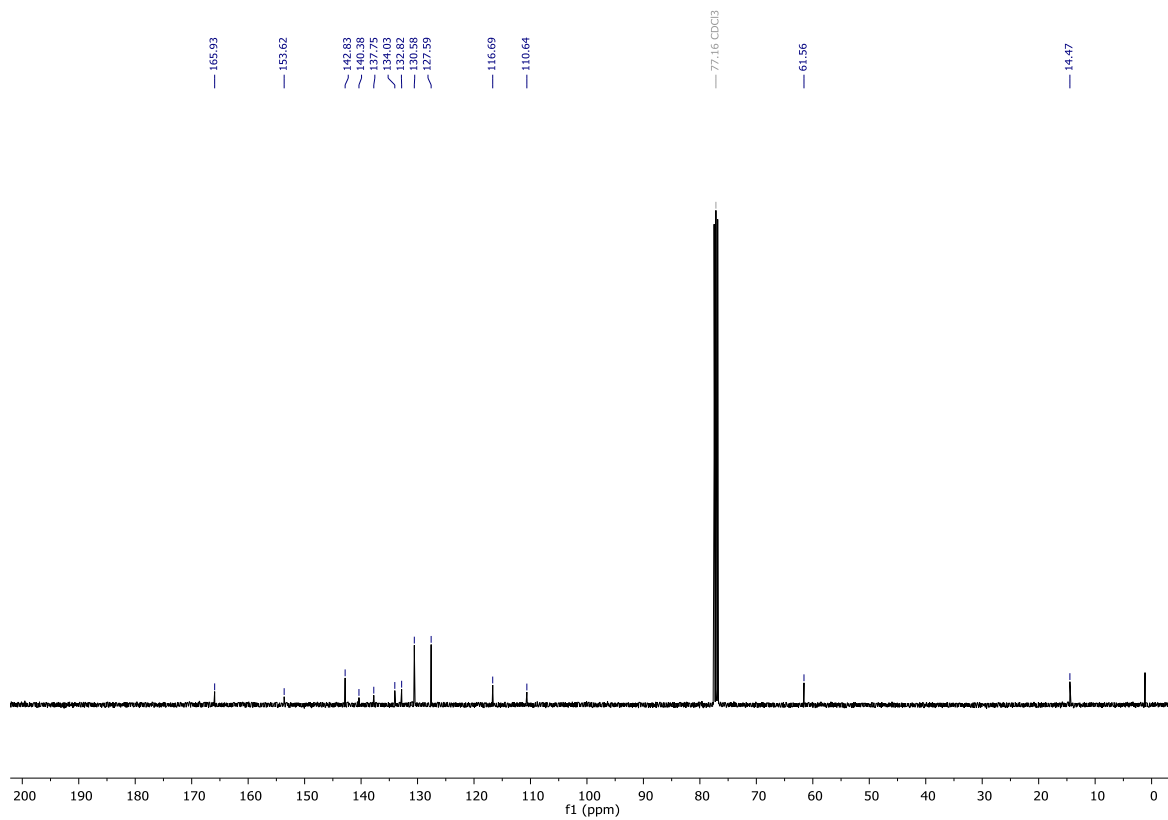

# 6-Chloro-2-(4-methoxyphenyl)imidazo[1,2-a]pyrazine-3-carbonitrile (16e)

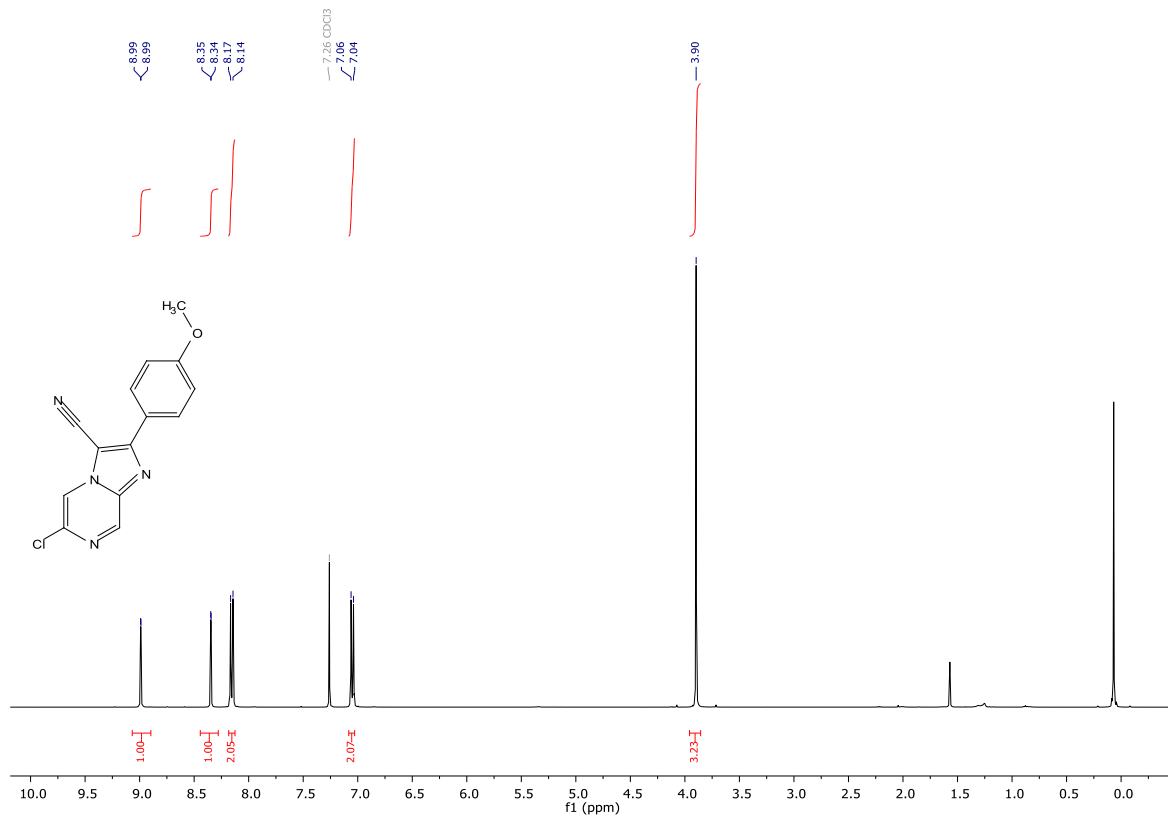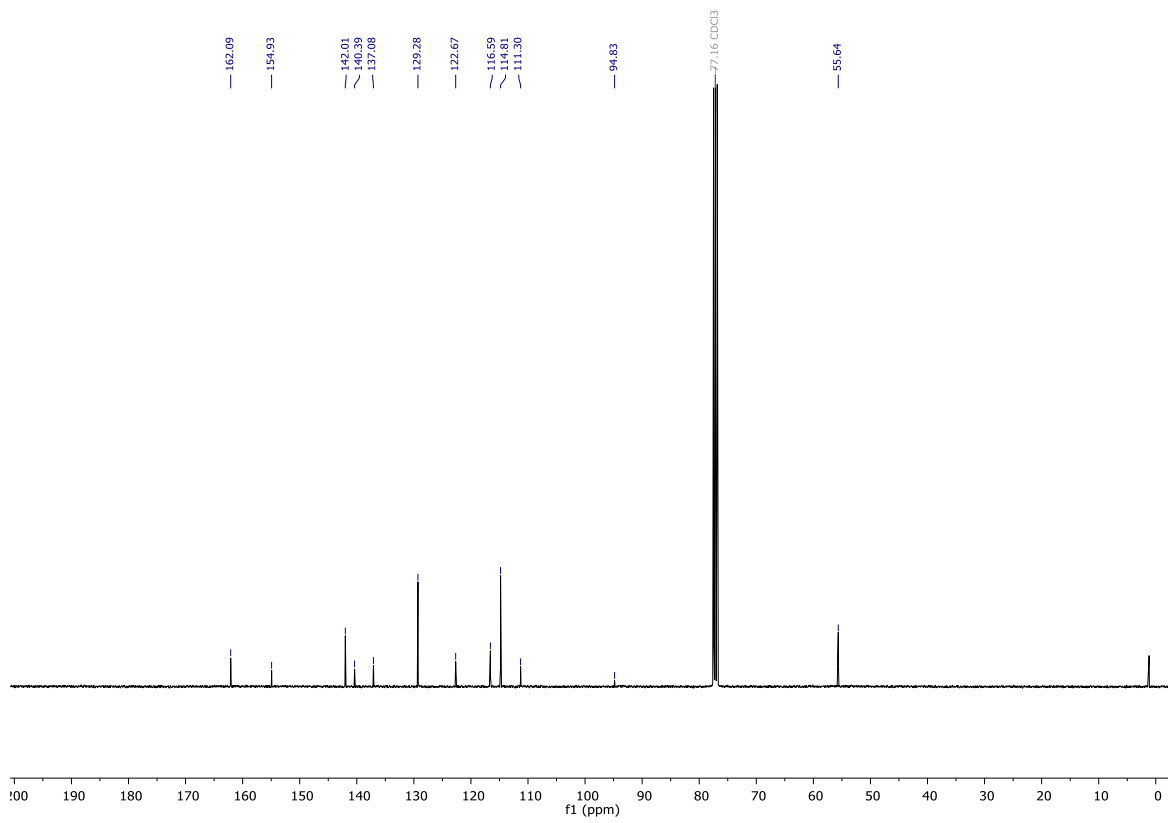

# 6-Chloro-8-iodo-2-(4-methoxyphenyl)imidazo[1,2-a]pyrazine-3-carbonitrile (18a)

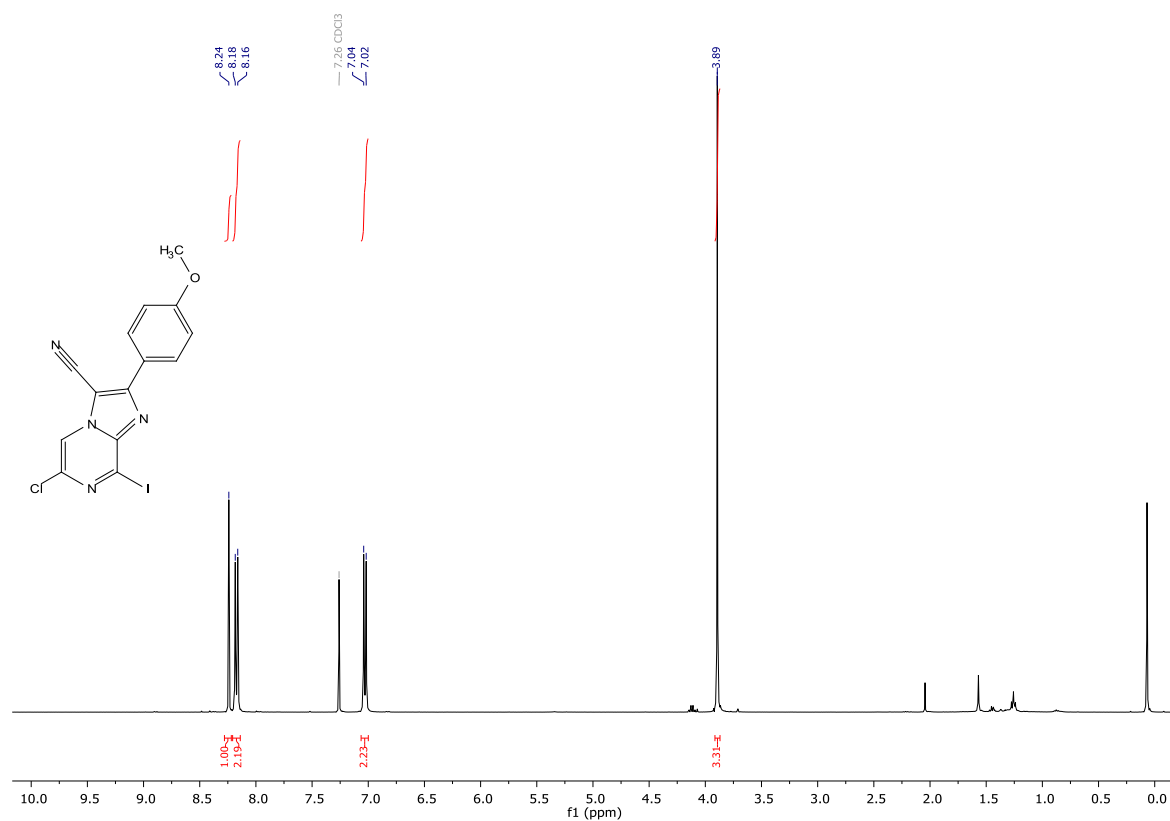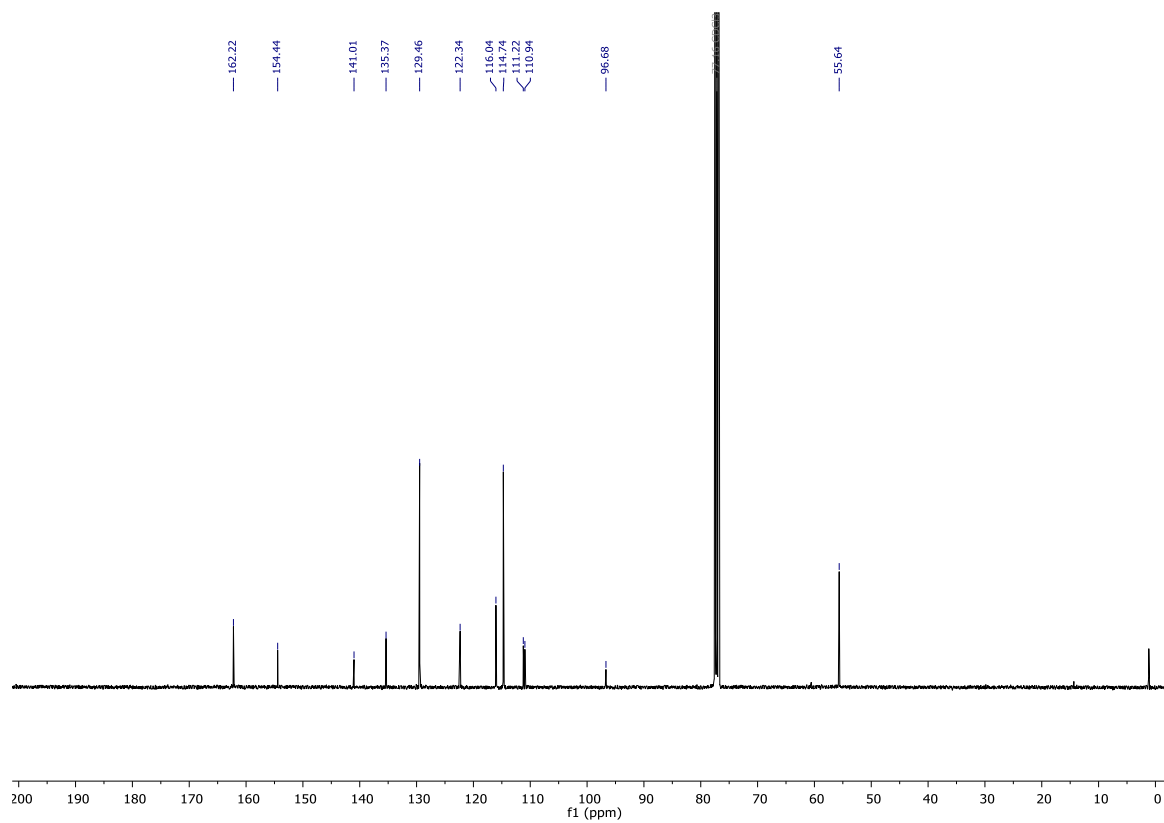

# 6-Chloro-2-(4-methoxyphenyl)-8-(methylthio)imidazo[1,2-a]pyrazine-3-carbonitrile (18b)

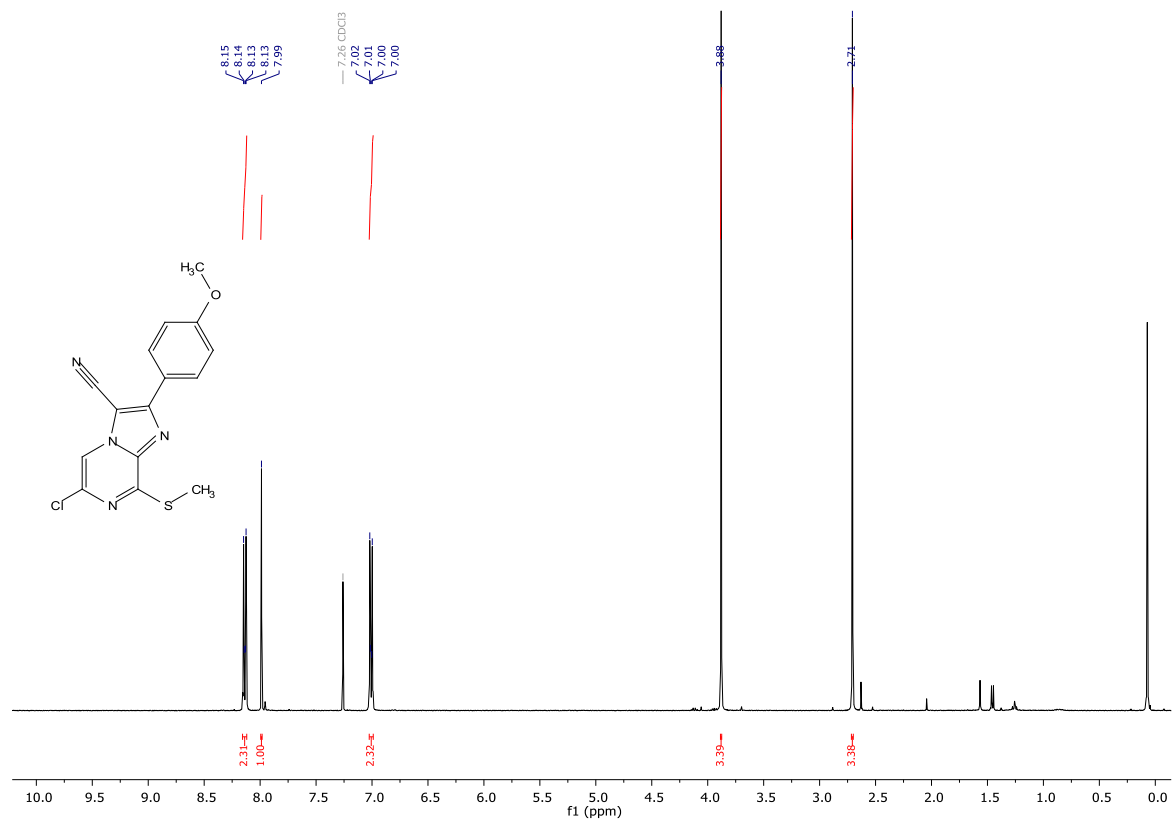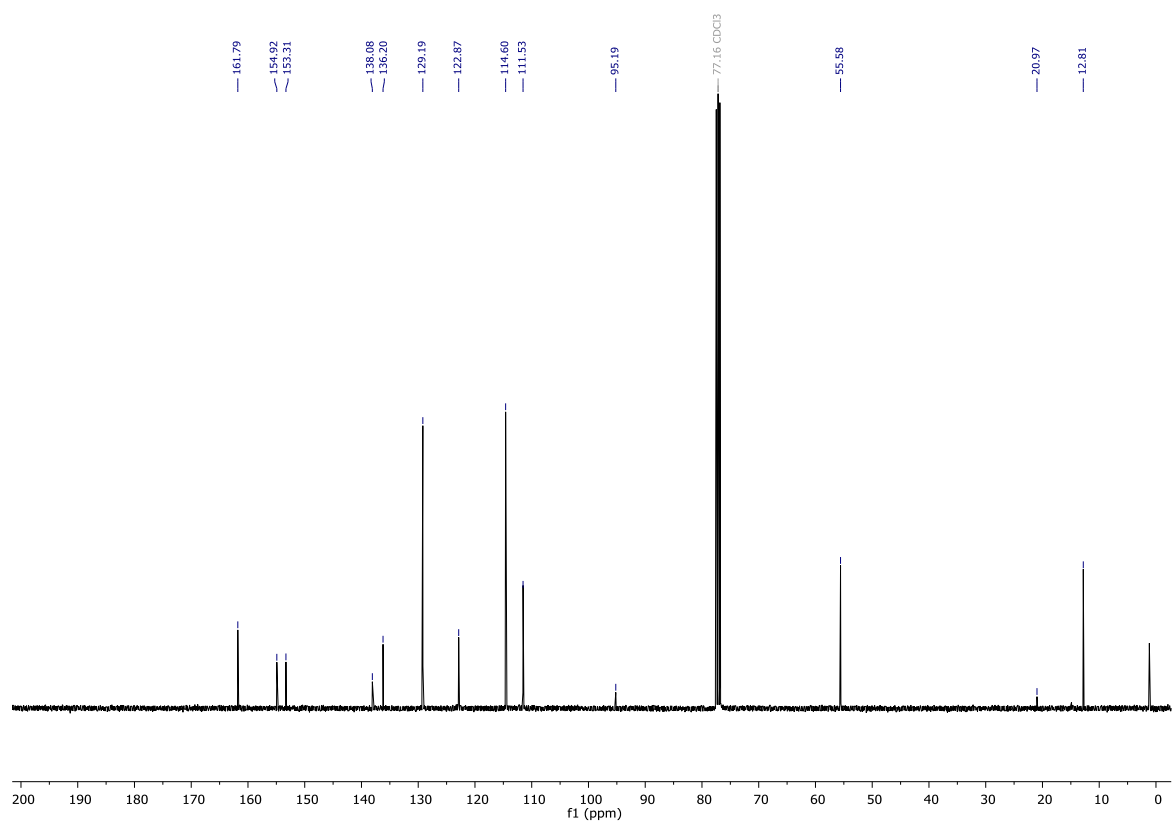

**Ethyl 4-(6-chloro-3-cyano-2-(4-methoxyphenyl)imidazo[1,2-a]pyrazin-8-yl)benzoate (18c)**

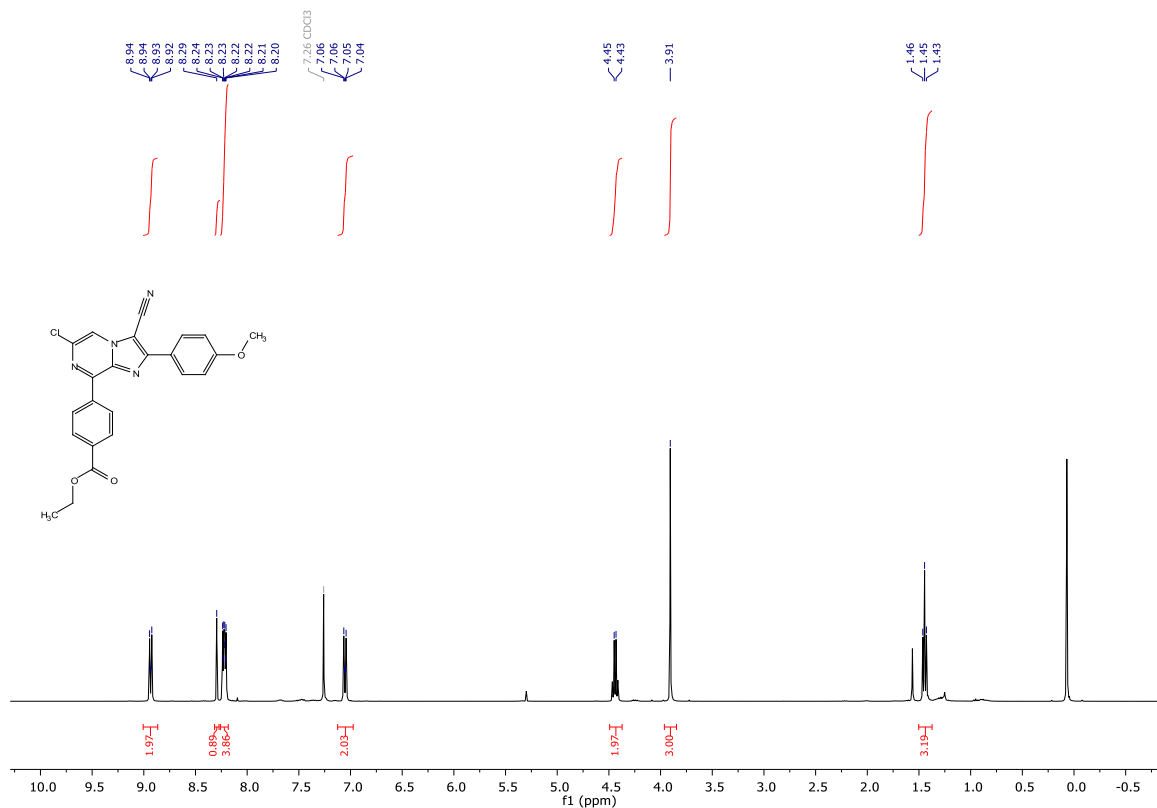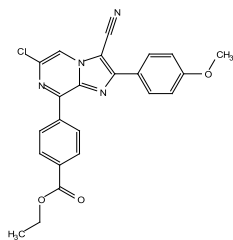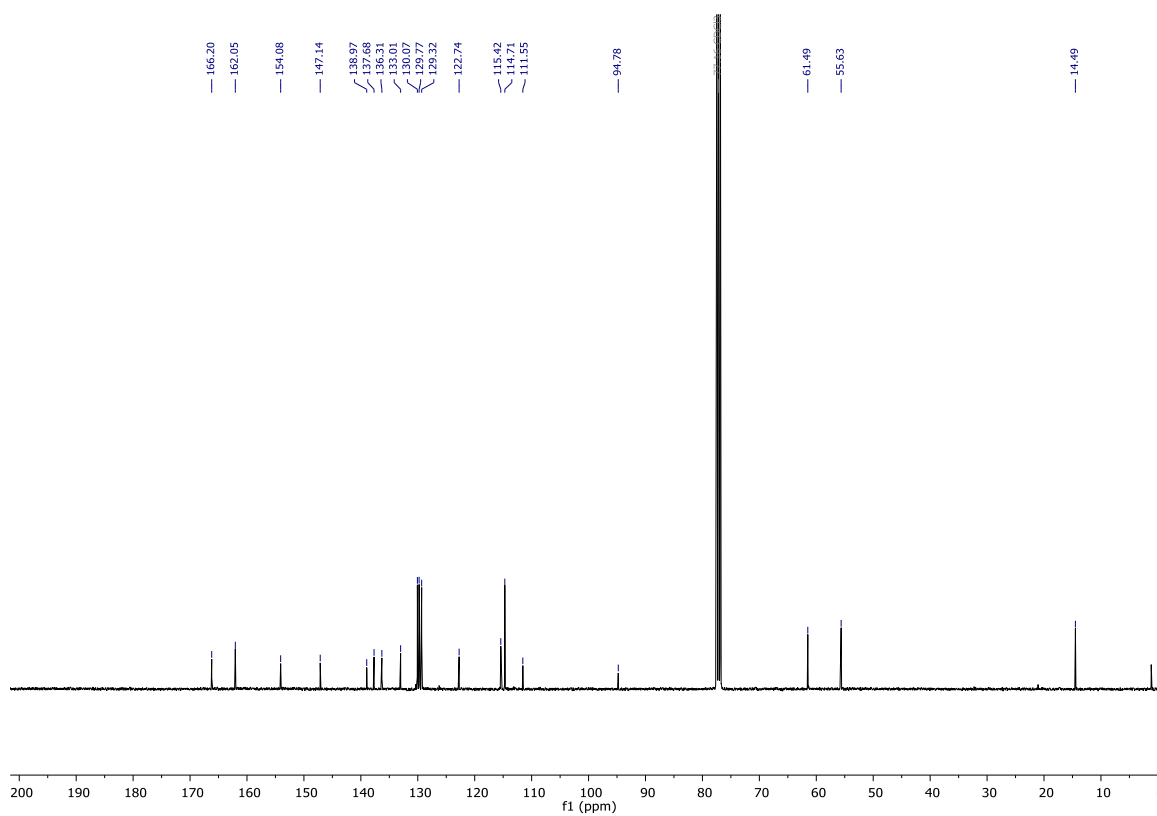

# 6-Chloro-2,8-bis(4-methoxyphenyl)imidazo[1,2-a]pyrazine-3-carbonitrile (18d)

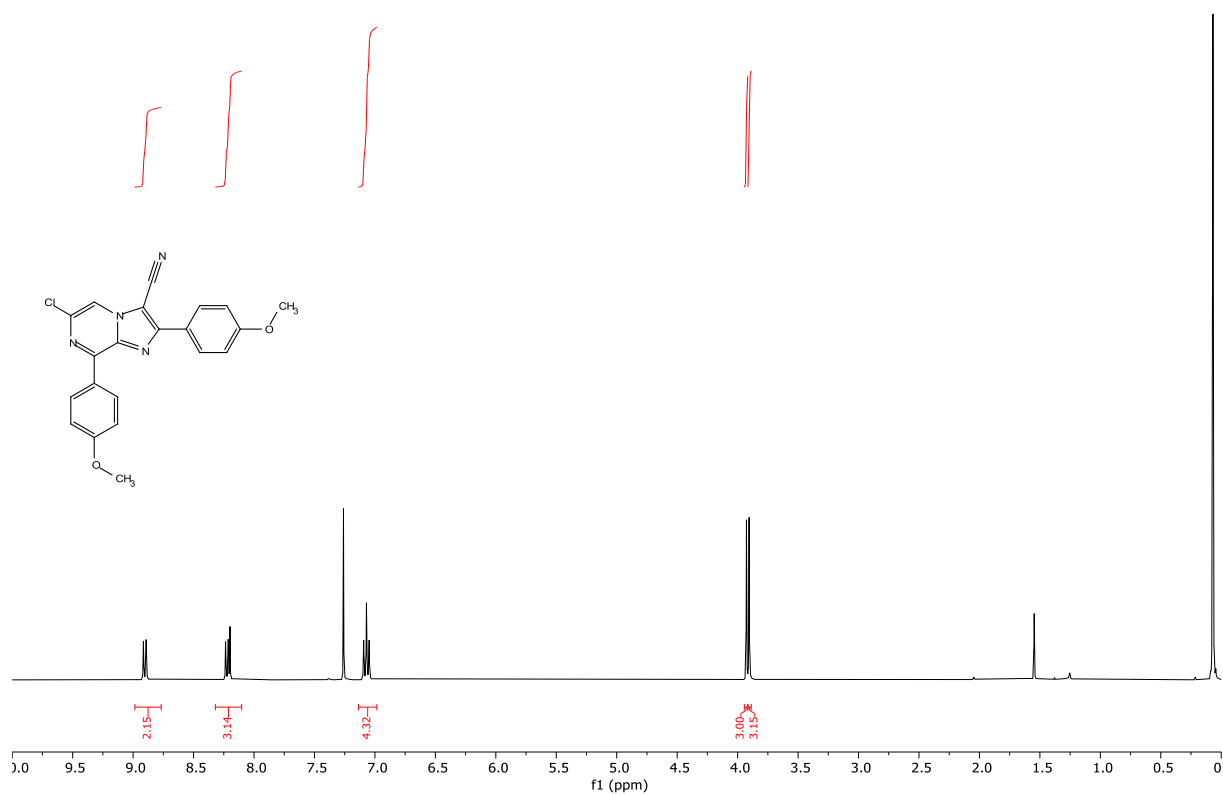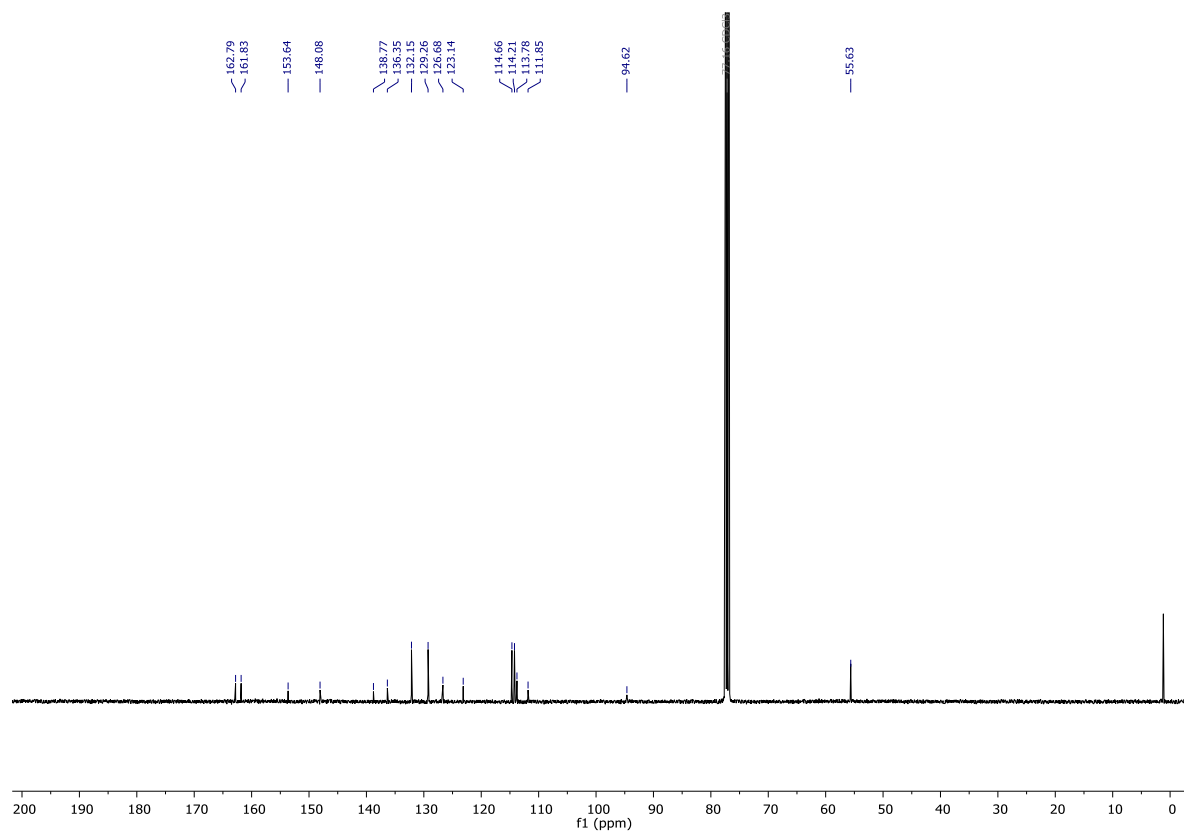

**8-(4-(tert-Butyl)phenyl)-6-chloro-2-(4-methoxyphenyl)imidazo[1,2-a]pyrazine-3-carbonitrile (18e)**

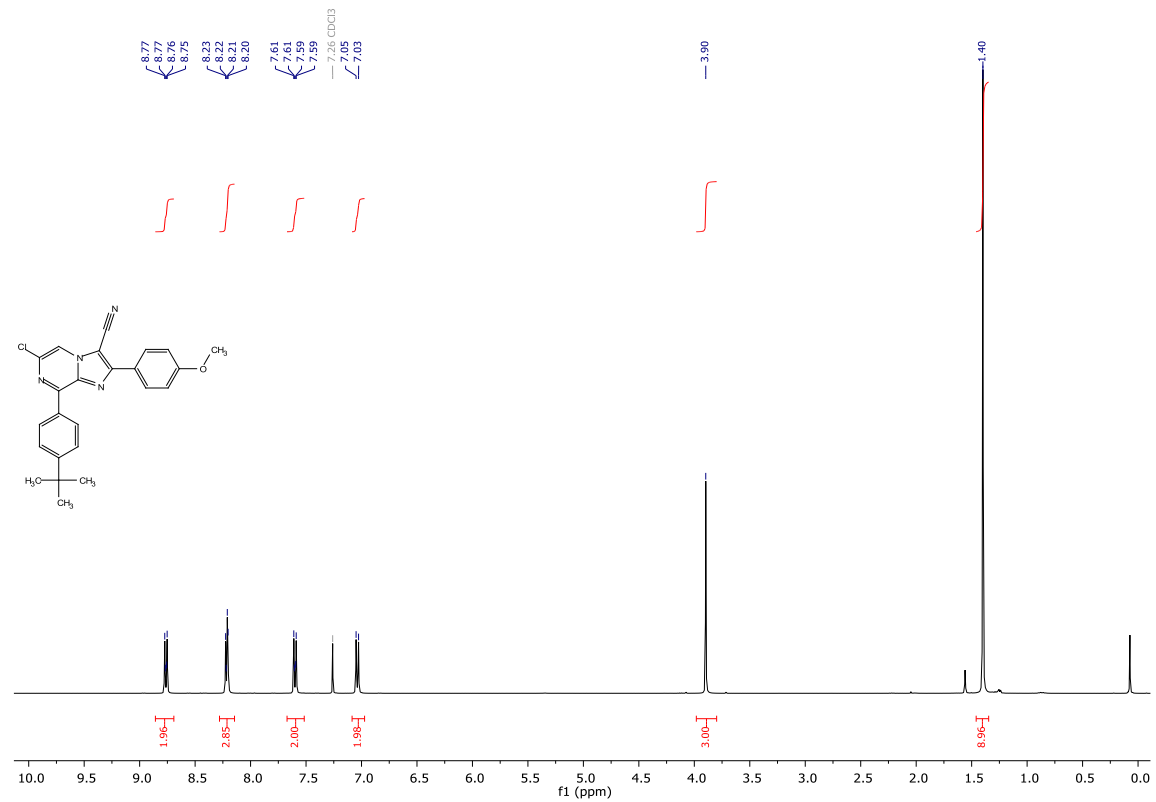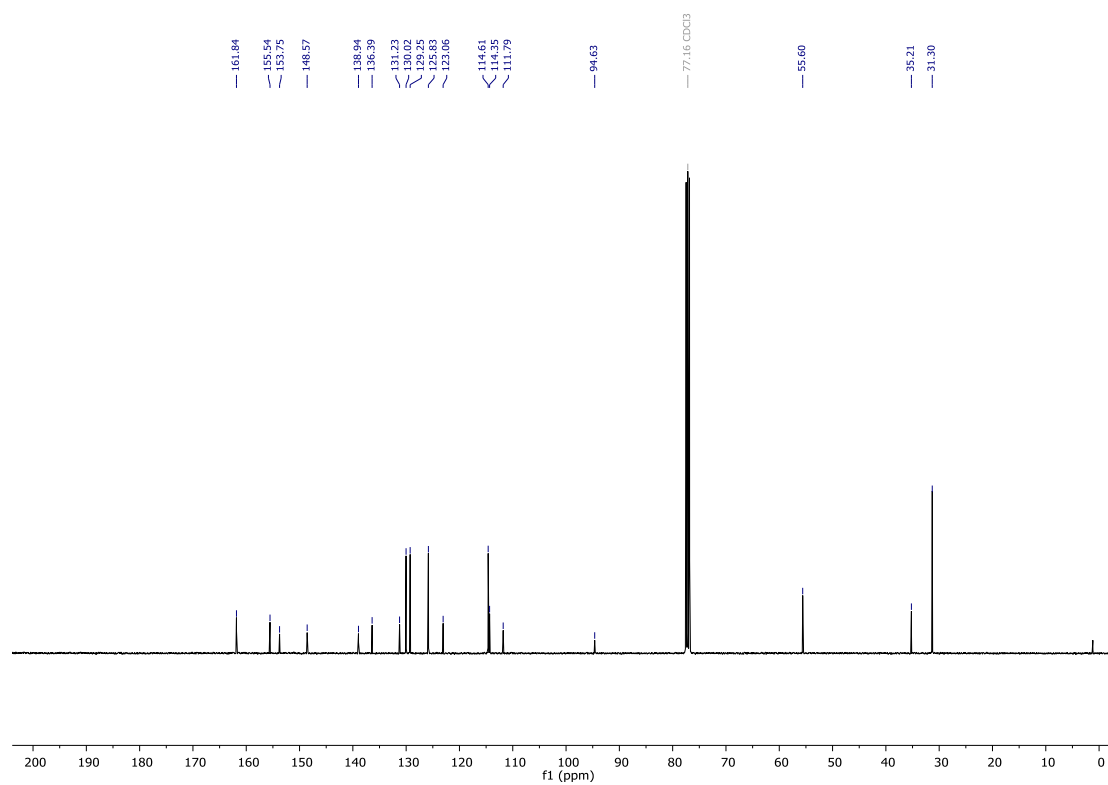



**8-(4-(*tert*-Butyl)phenyl)-6-chloro-5-iodo-2-(4-methoxyphenyl)imidazo[1,2-*a*]pyrazine-3-carbonitrile (20)**

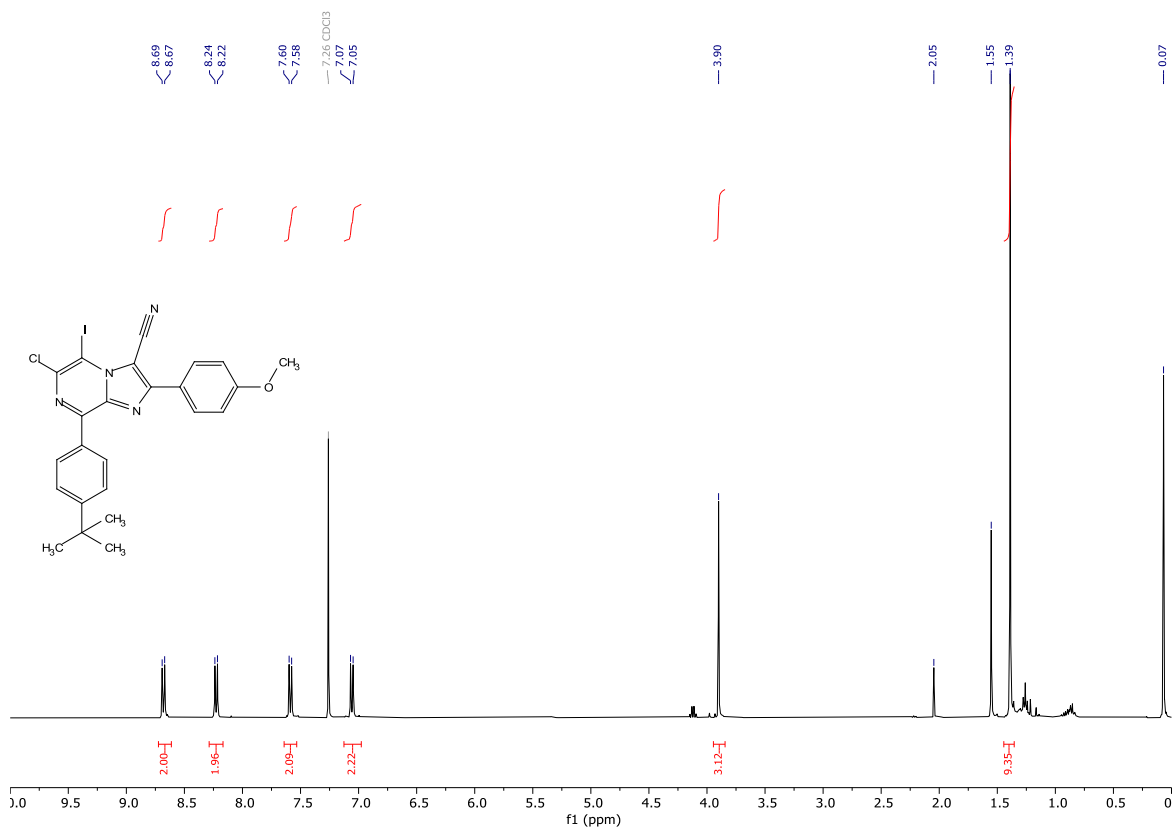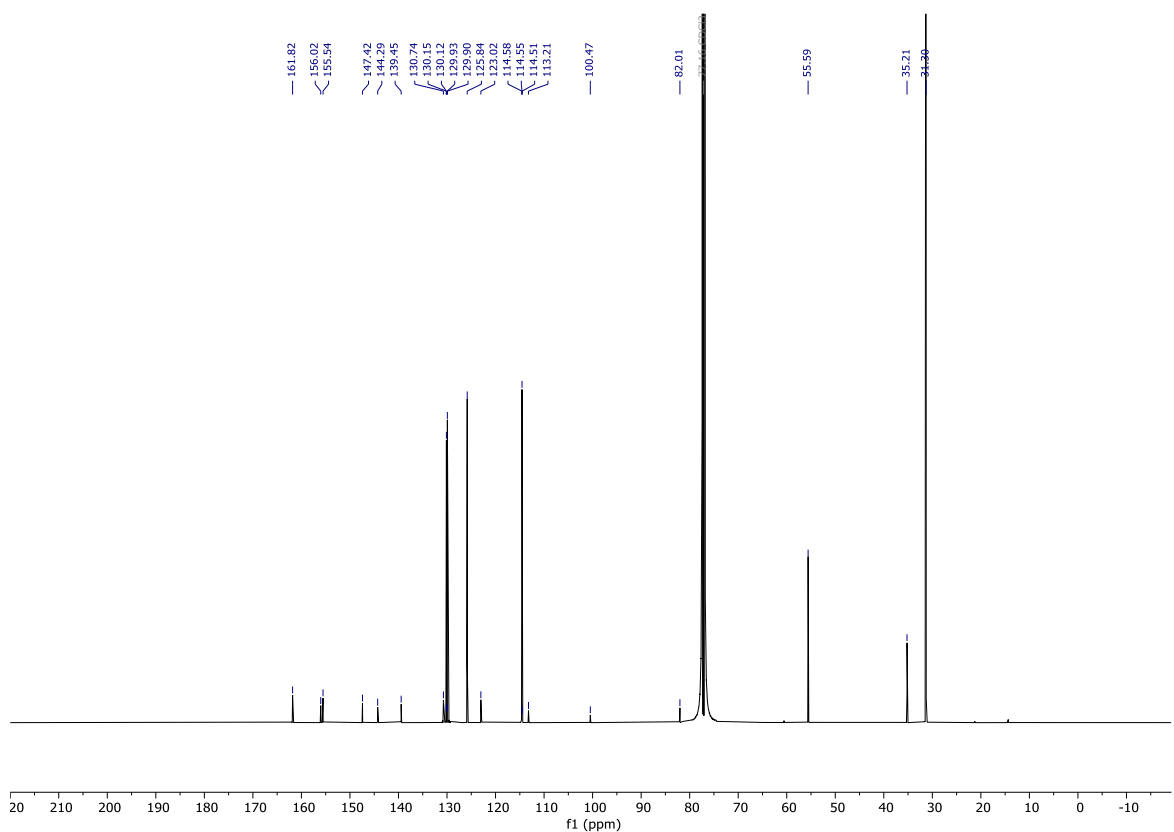

# Ethyl 4-(imidazo[1,2-a]pyrazin-6-yl)benzoate (22a)

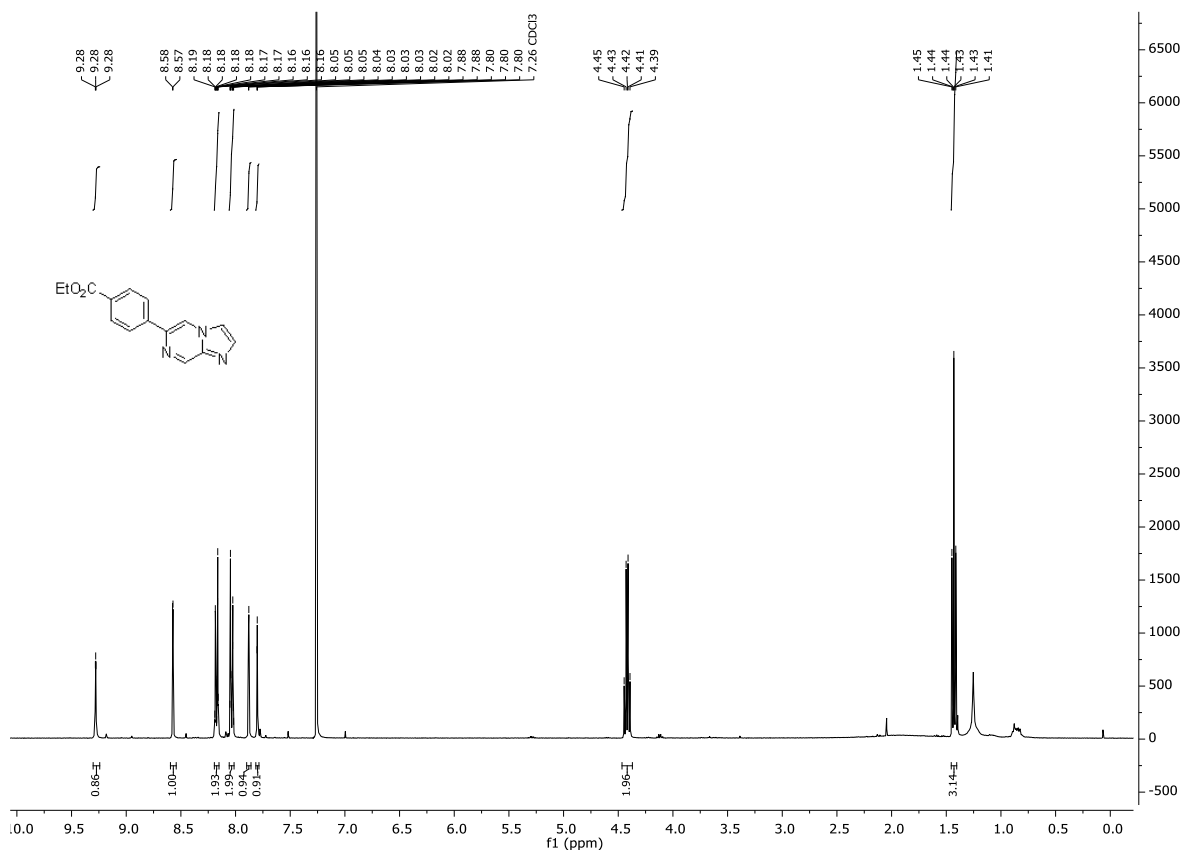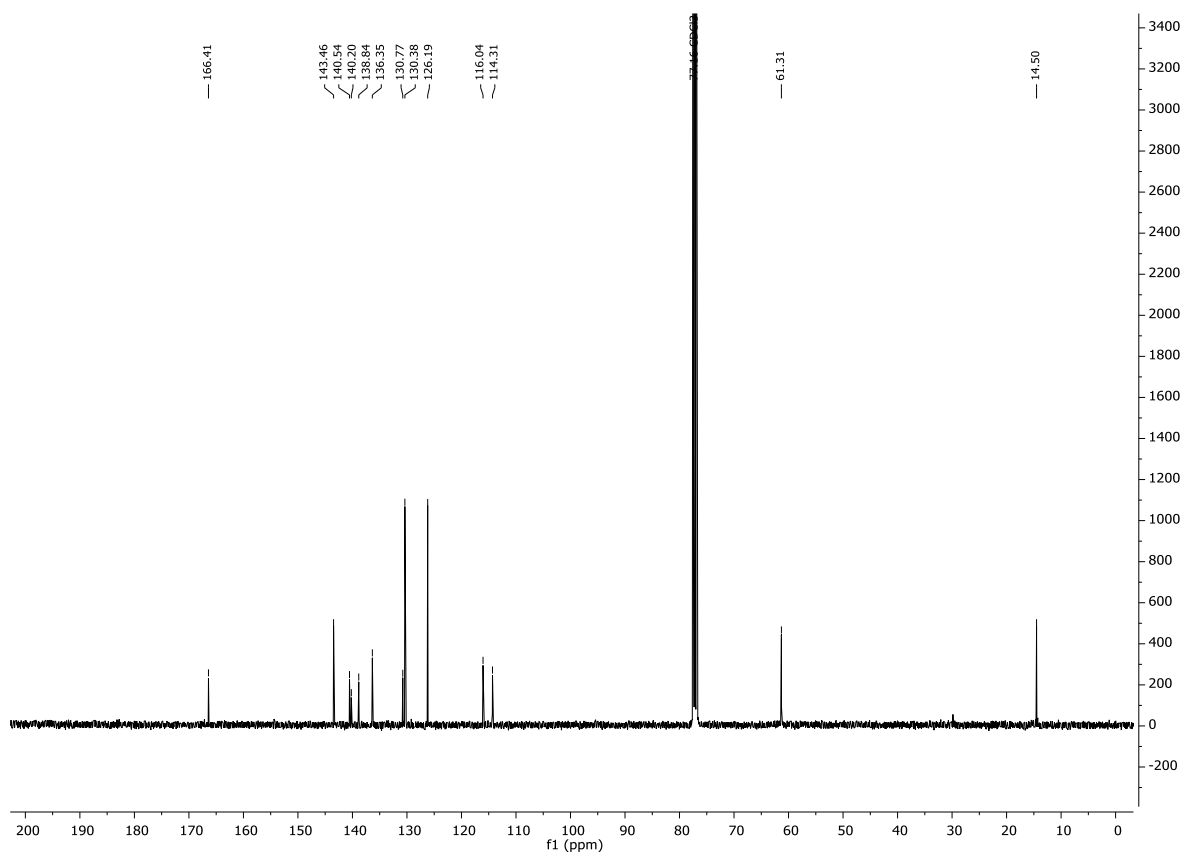

### 3-(Imidazo[1,2-a]pyrazin-6-yl)benzonitrile (22b)

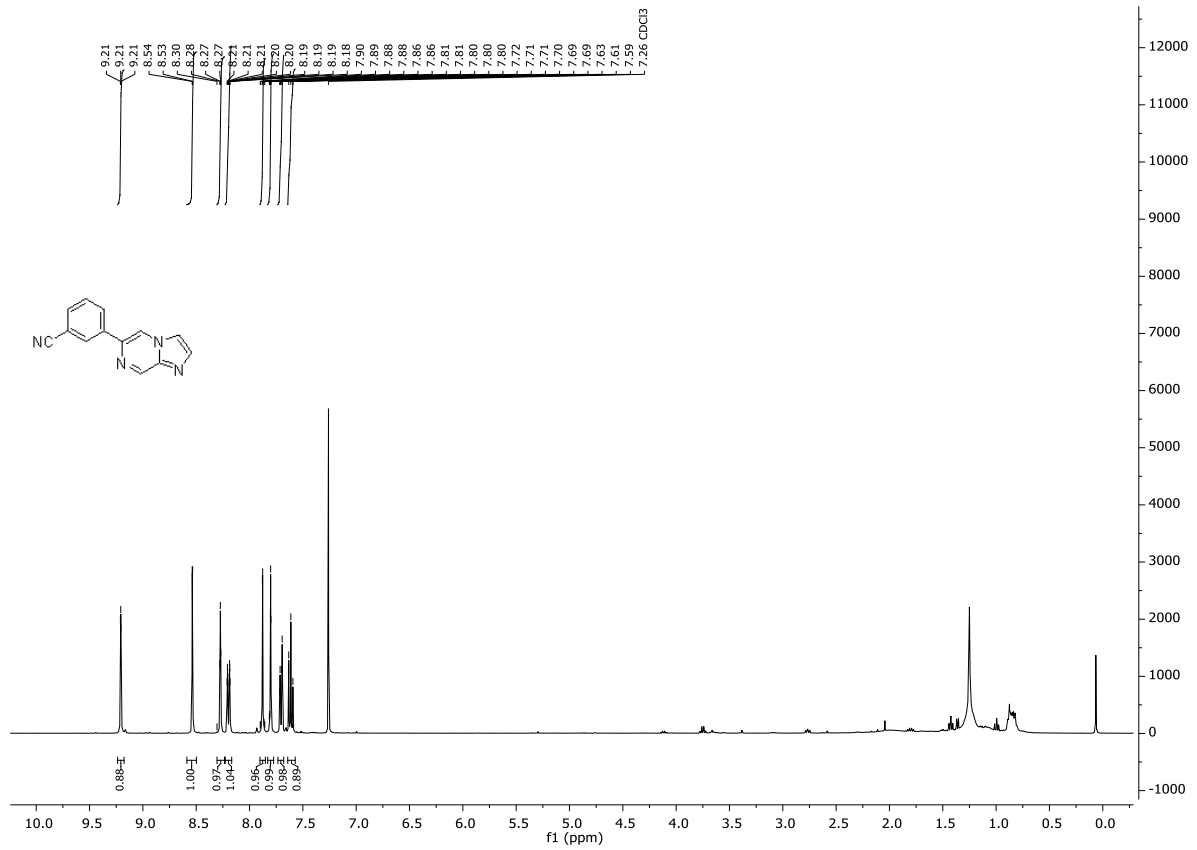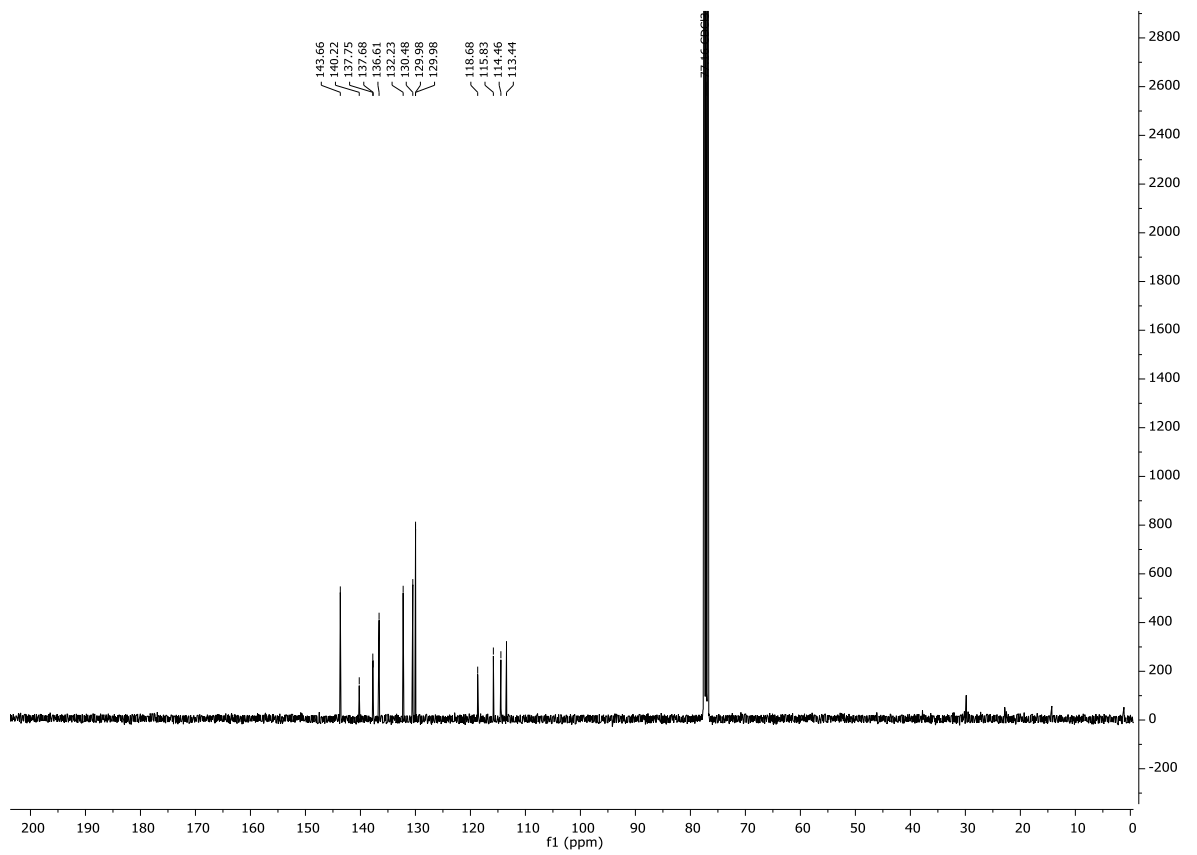

# 6-(2-(1,3-Dioxan-2-yl)ethyl)imidazo[1,2-a]pyrazine (22c)

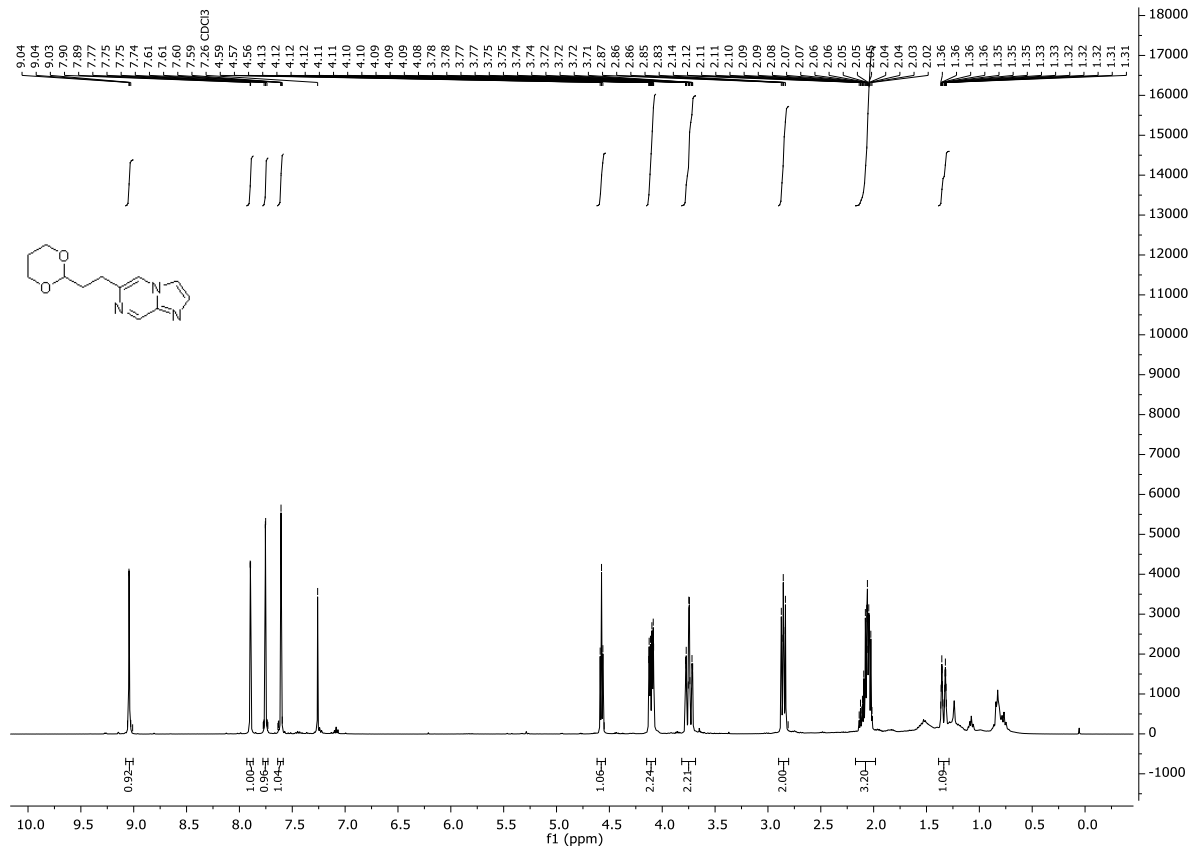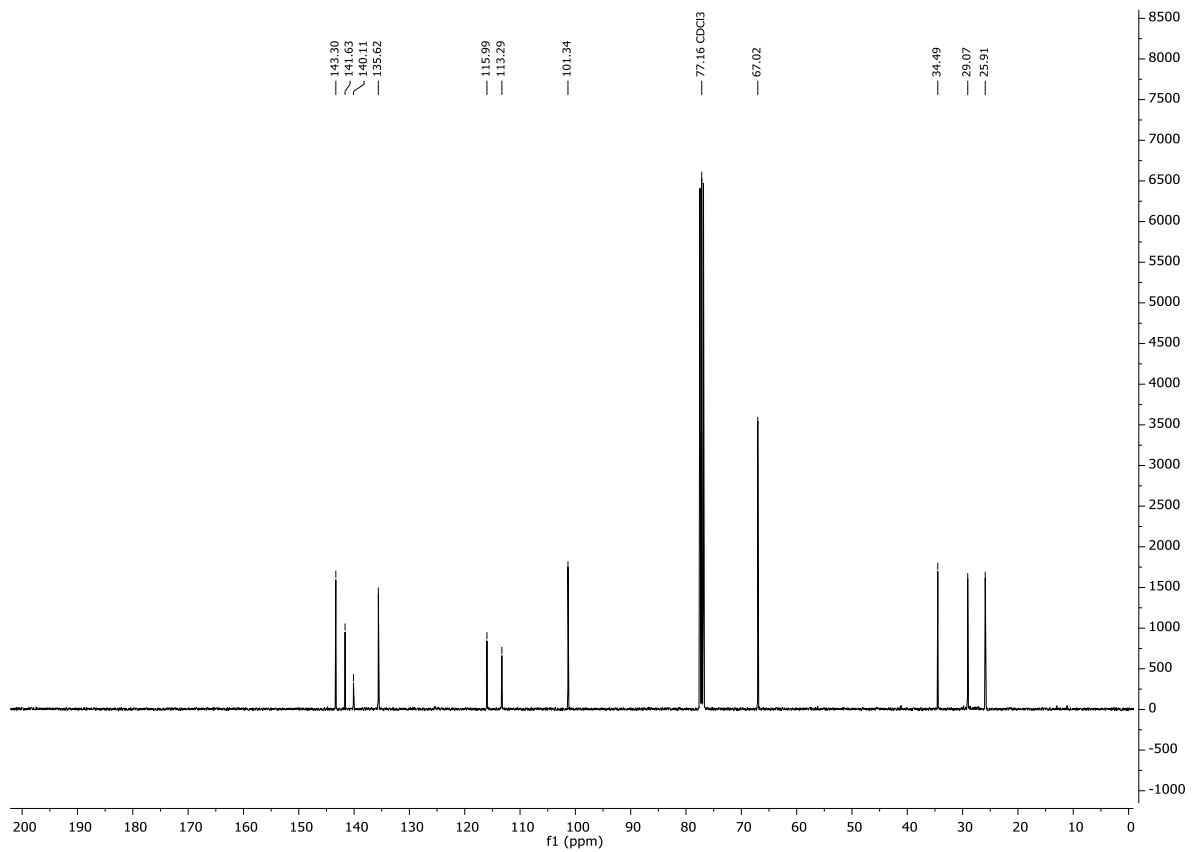

# 4-(Imidazo[1,2-a]pyrazin-6-yl)butanenitrile (22d)

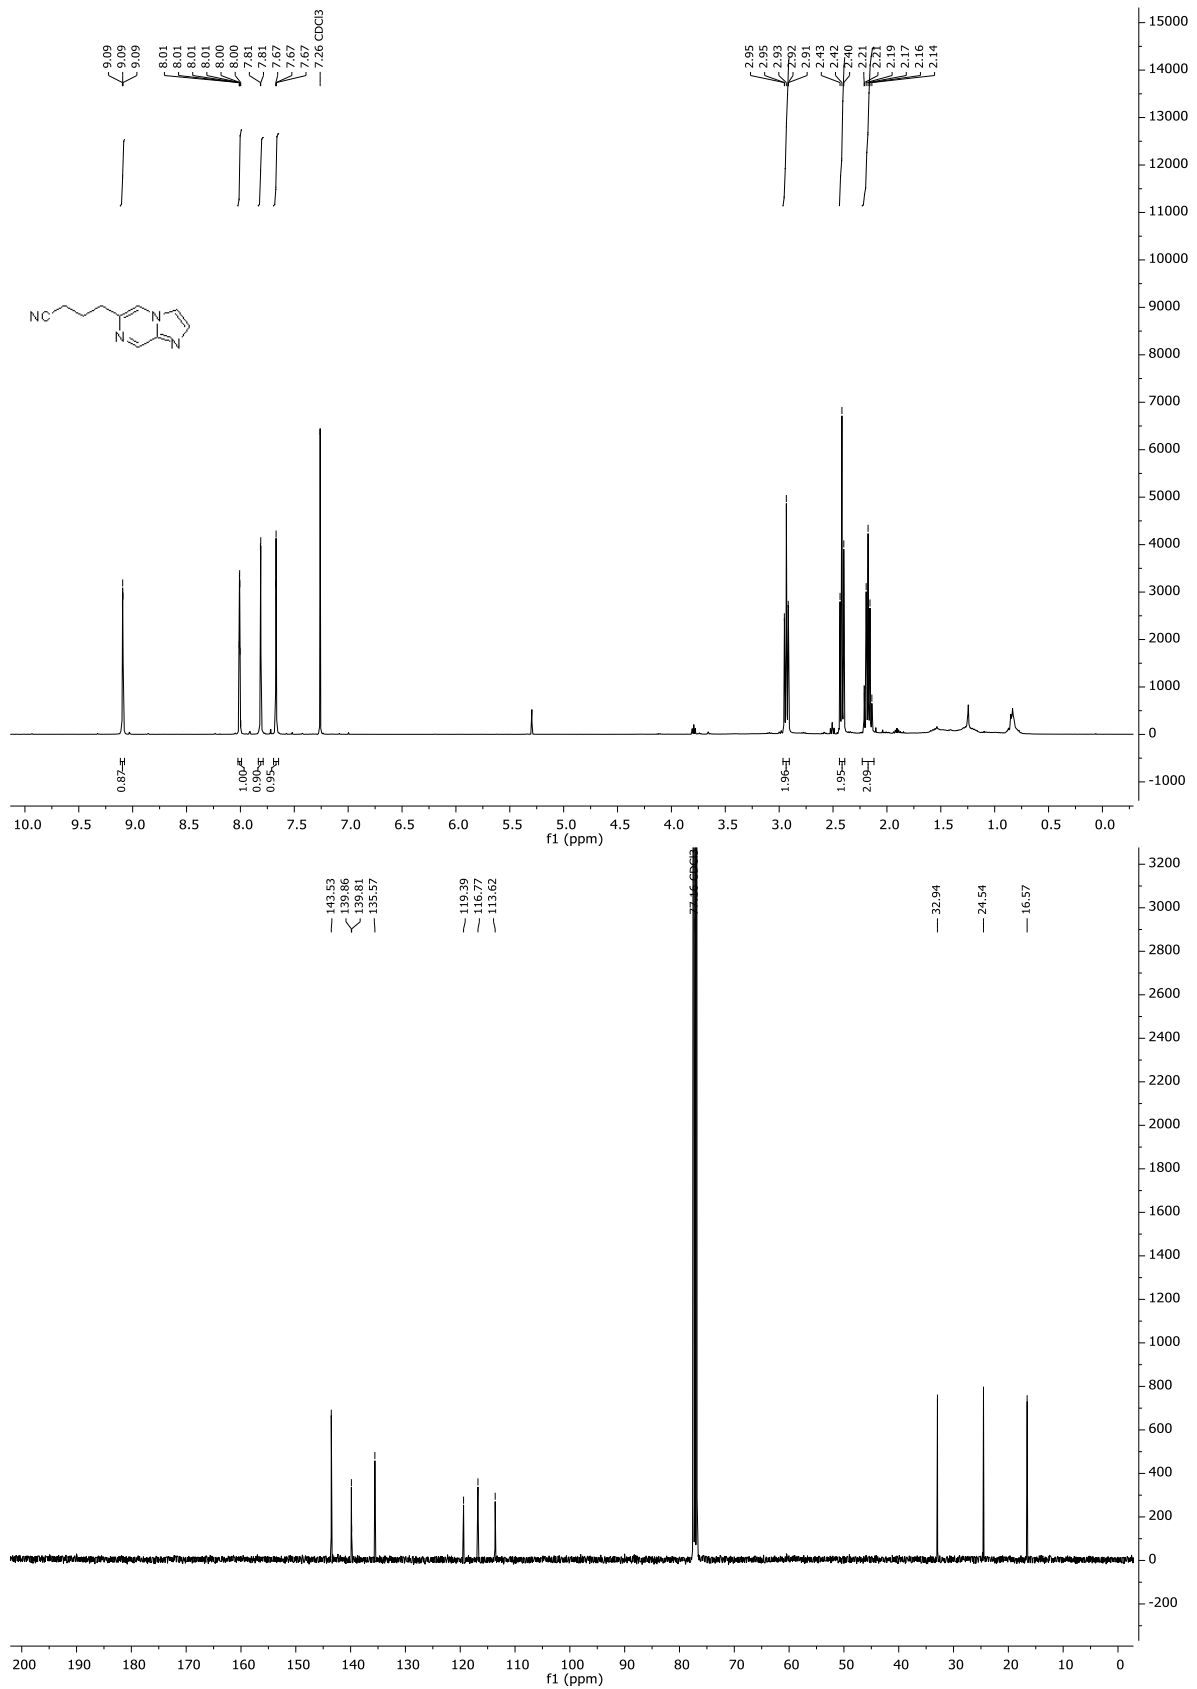

# 6-(4-Fluorobenzyl)imidazo[1,2-a]pyrazine (22e)

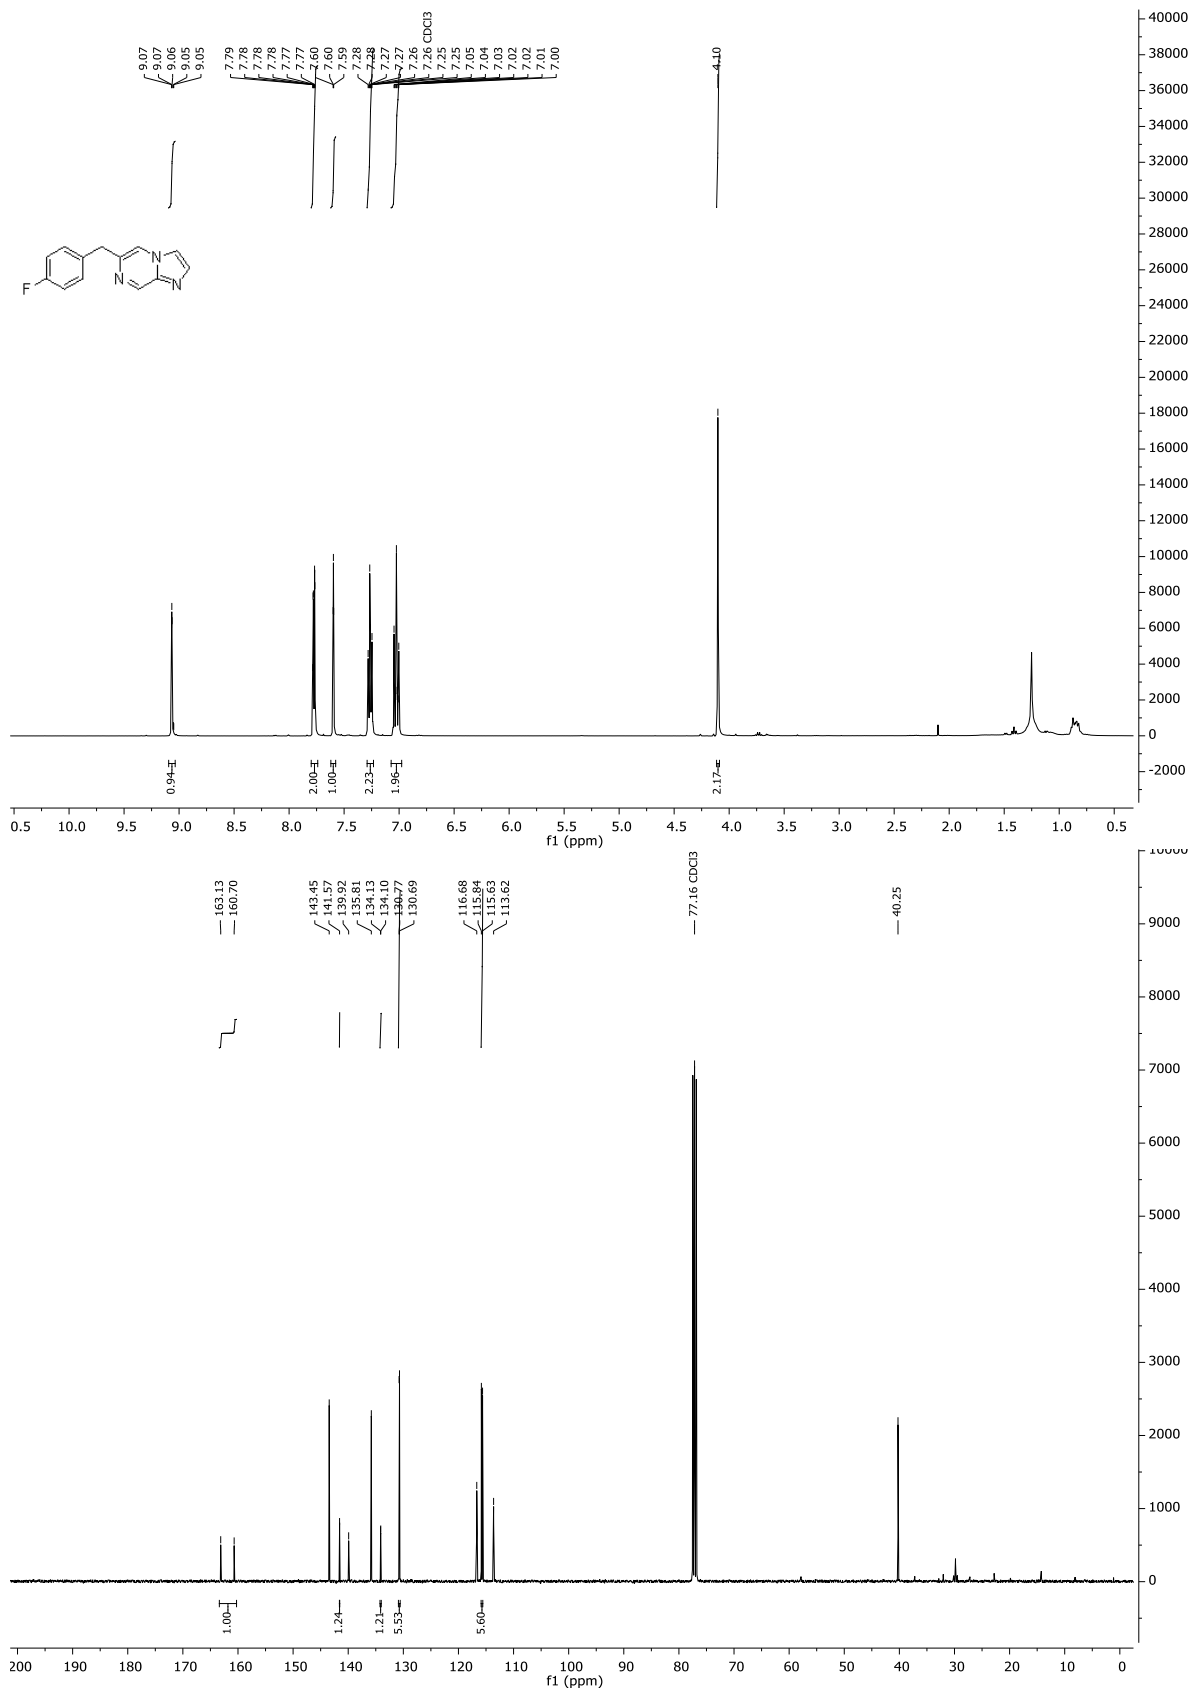

# 6-(4-Chlorophenyl)imidazo[1,2-a]pyrazine-3-carbonitrile (S1)

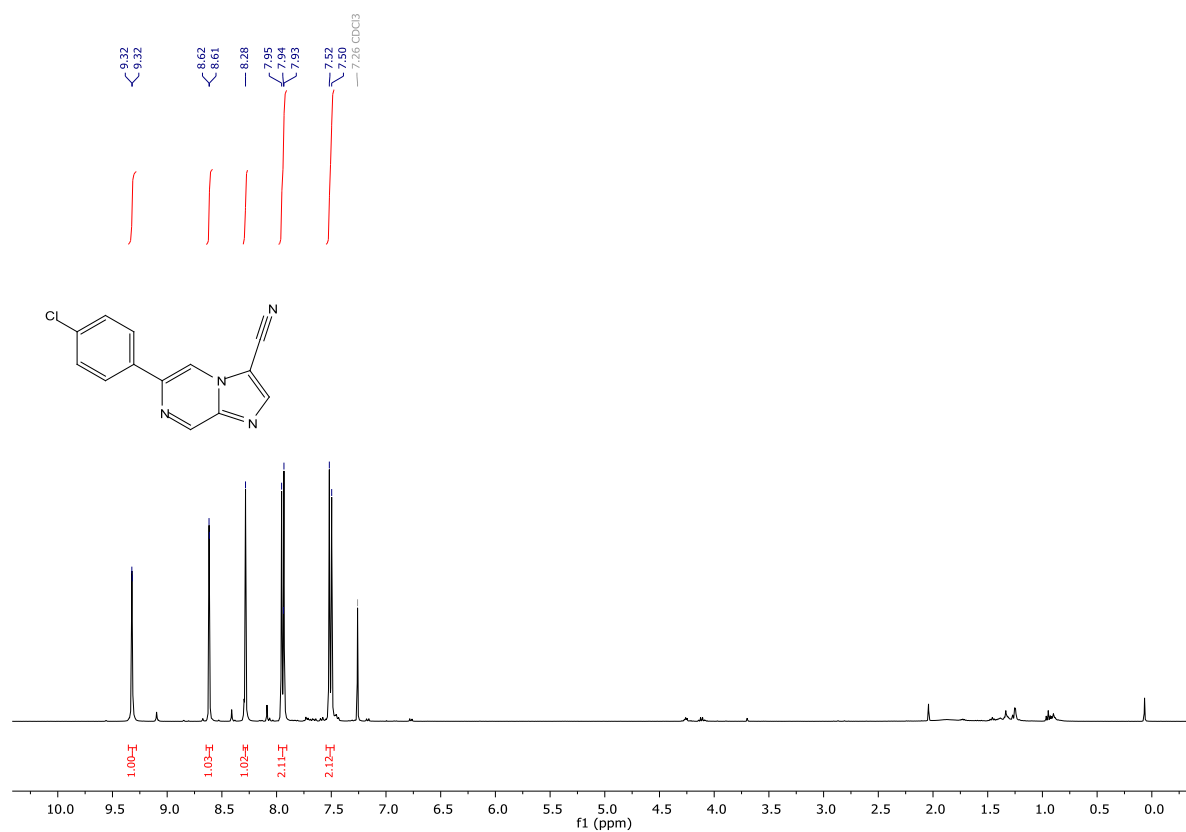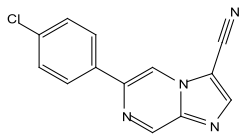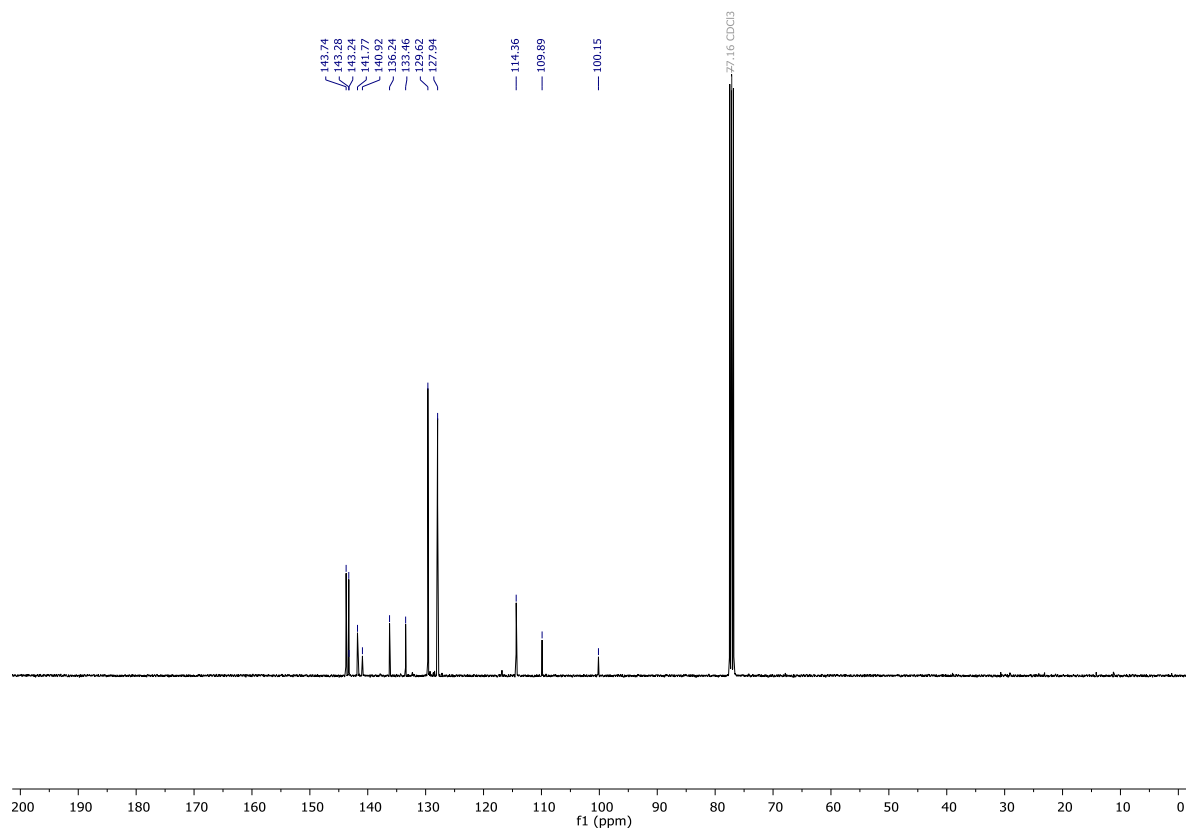

# 6-Phenylimidazo[1,2-a]pyrazine-3-carbonitrile (S2)

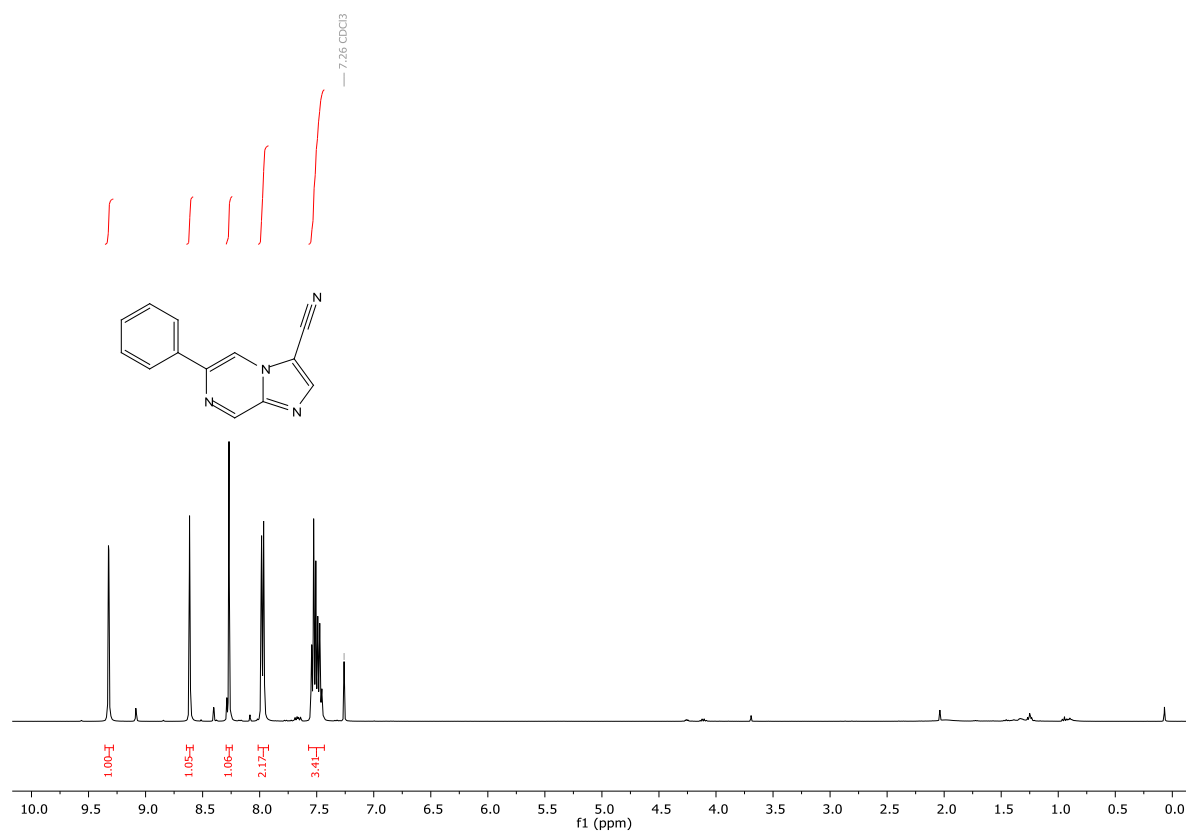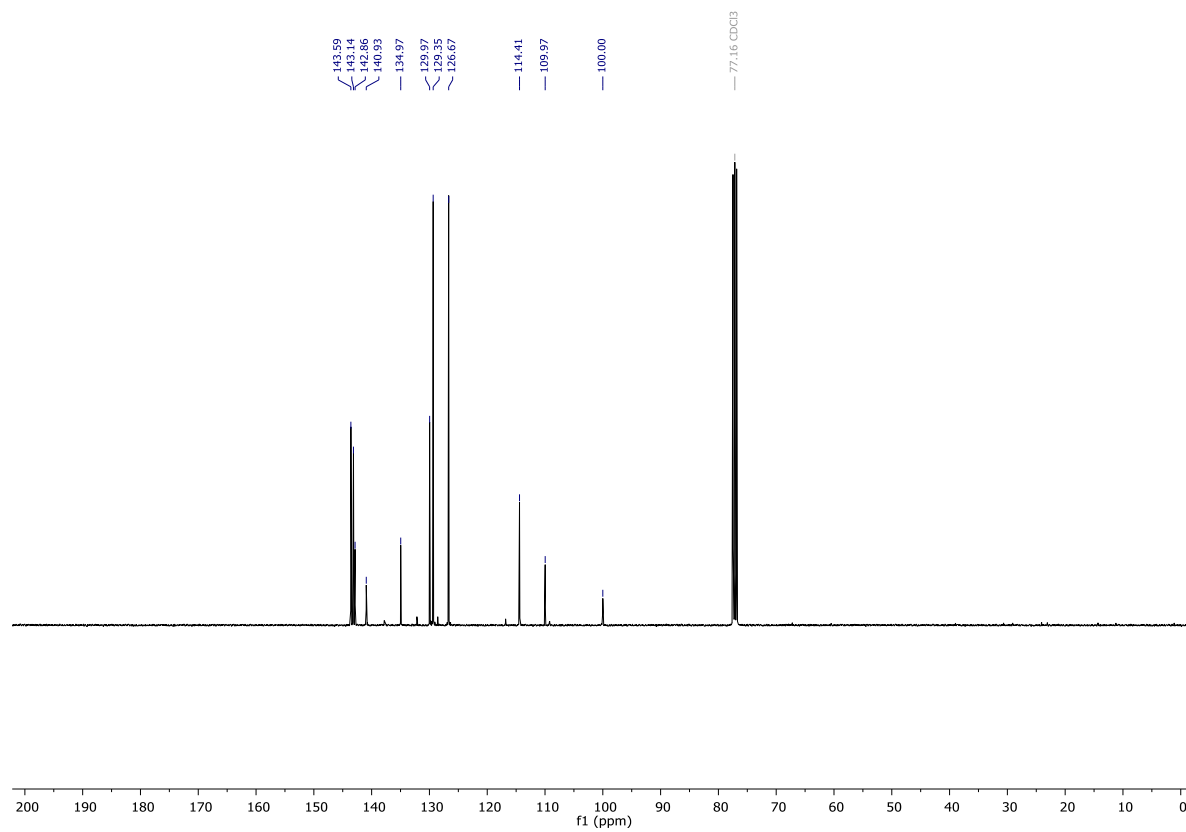



# 6-(3,4-Dimethoxyphenyl)imidazo[1,2-a]pyrazine-3-carbonitrile (S3)

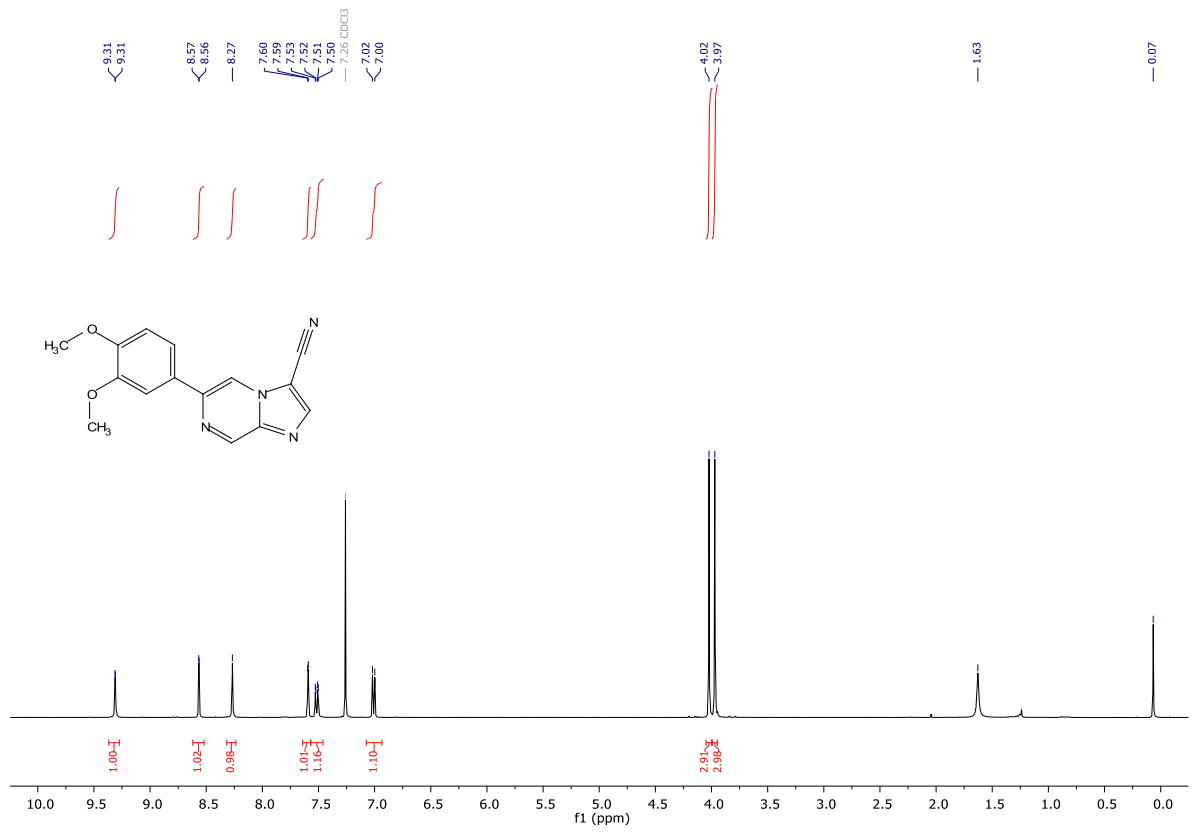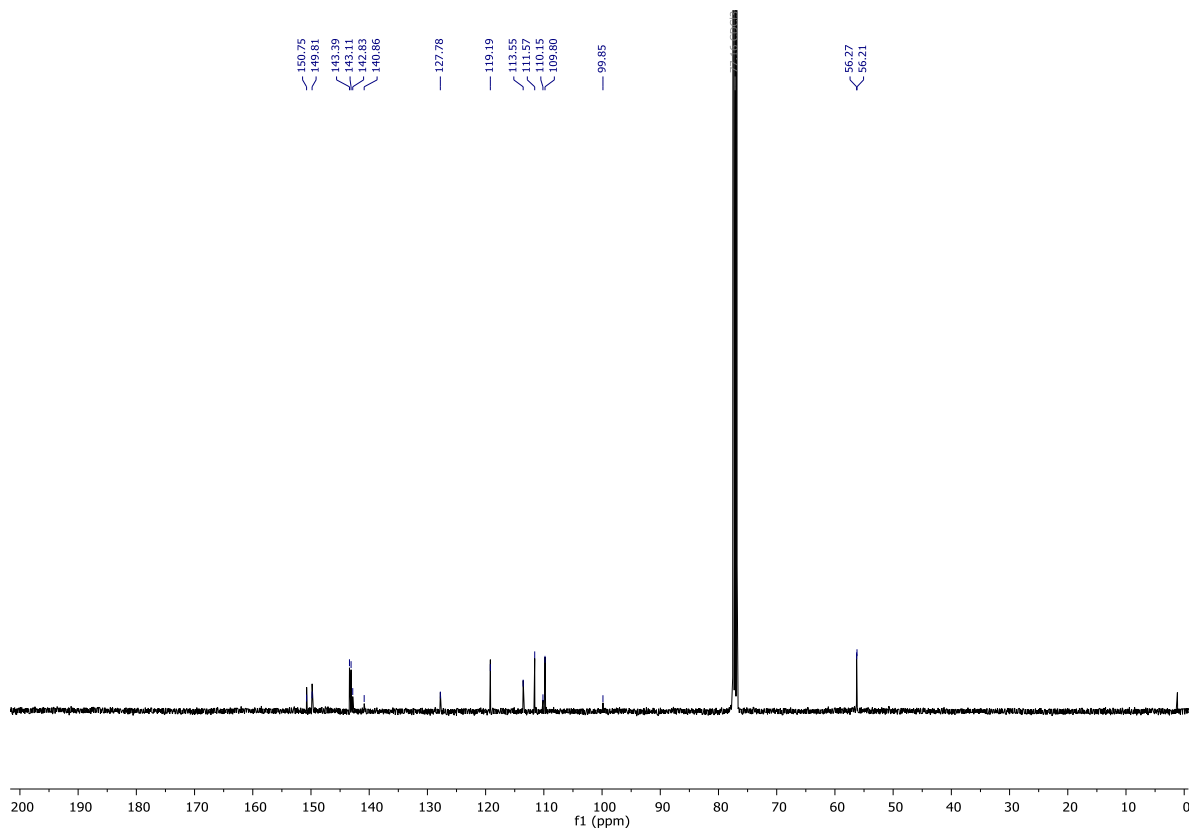

# 6-Chloro-8-(4-methoxyphenyl)-5,8-dihydroimidazo[1,2-a]pyrazine (26a)

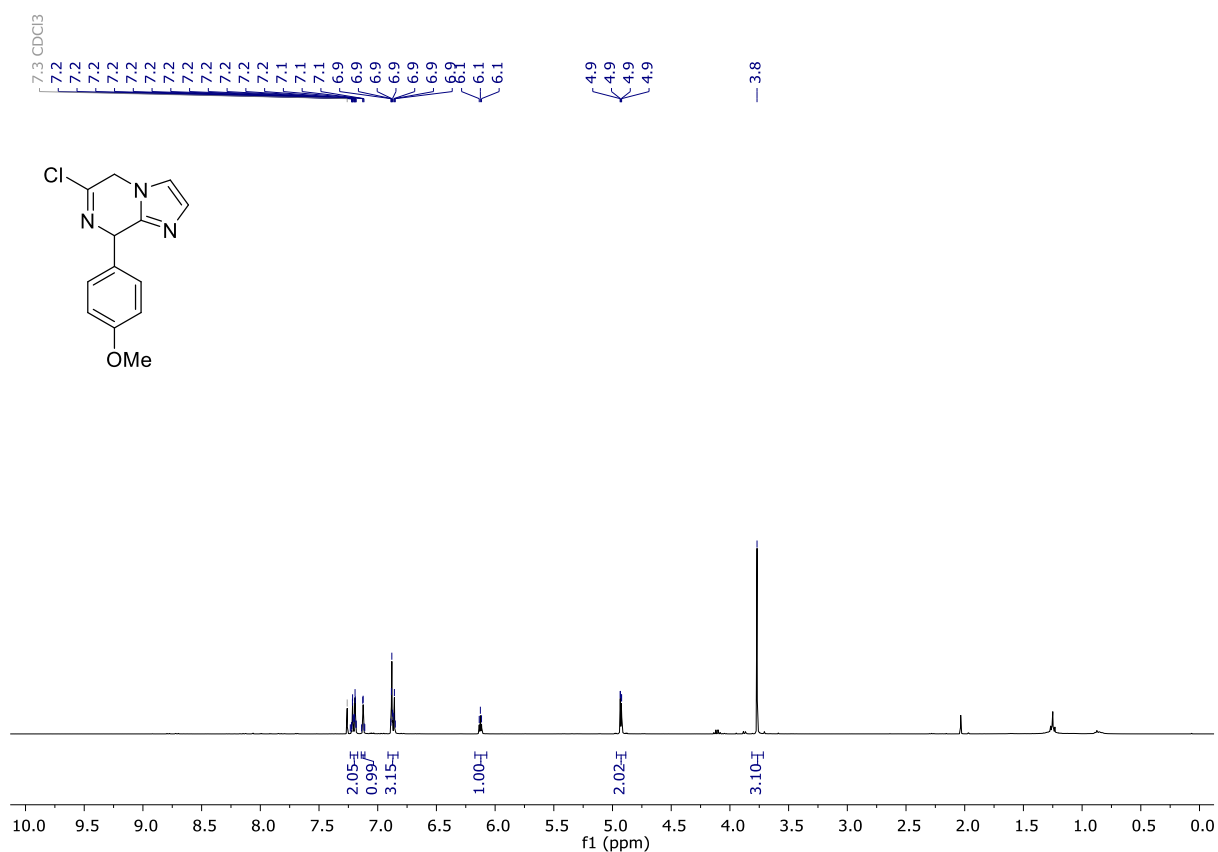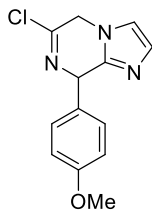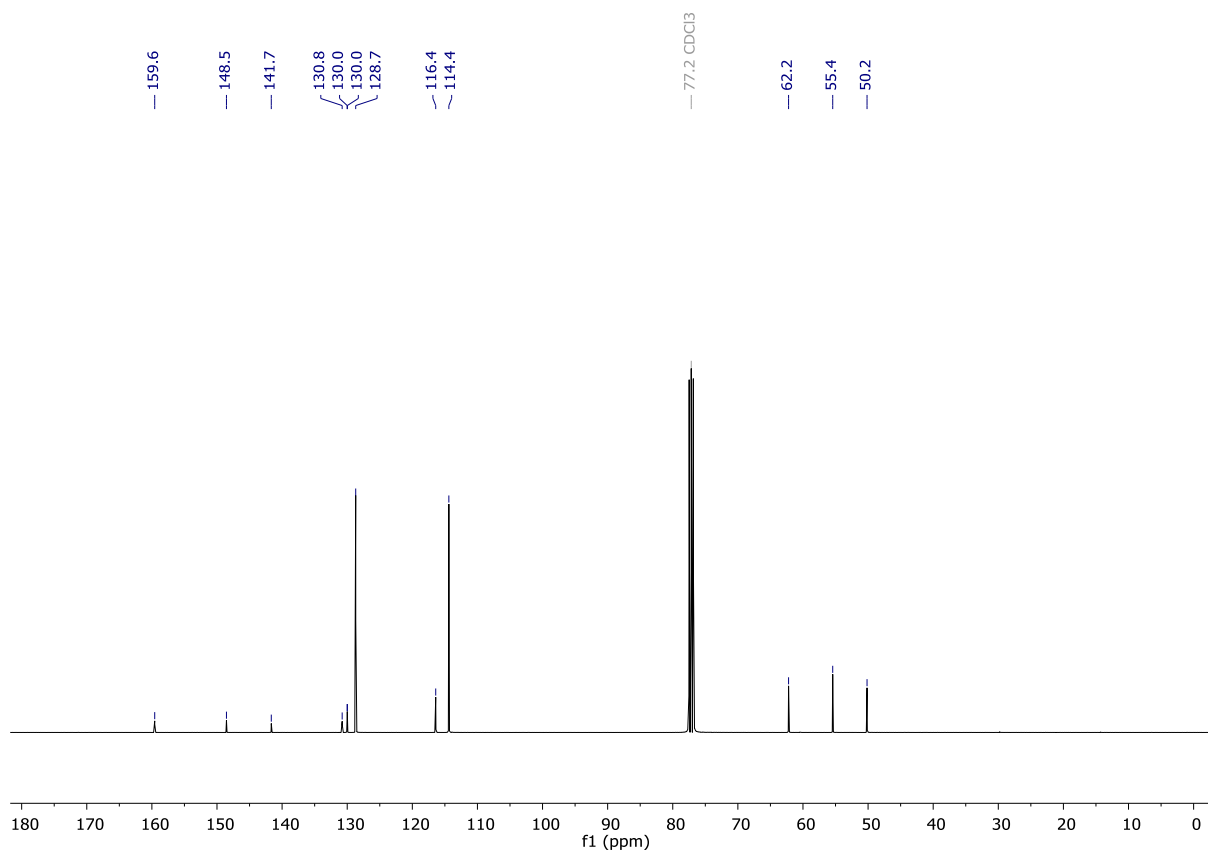

# 6-Chloro-8-(4-methoxyphenyl)imidazo[1,2-a]pyrazine (27a)

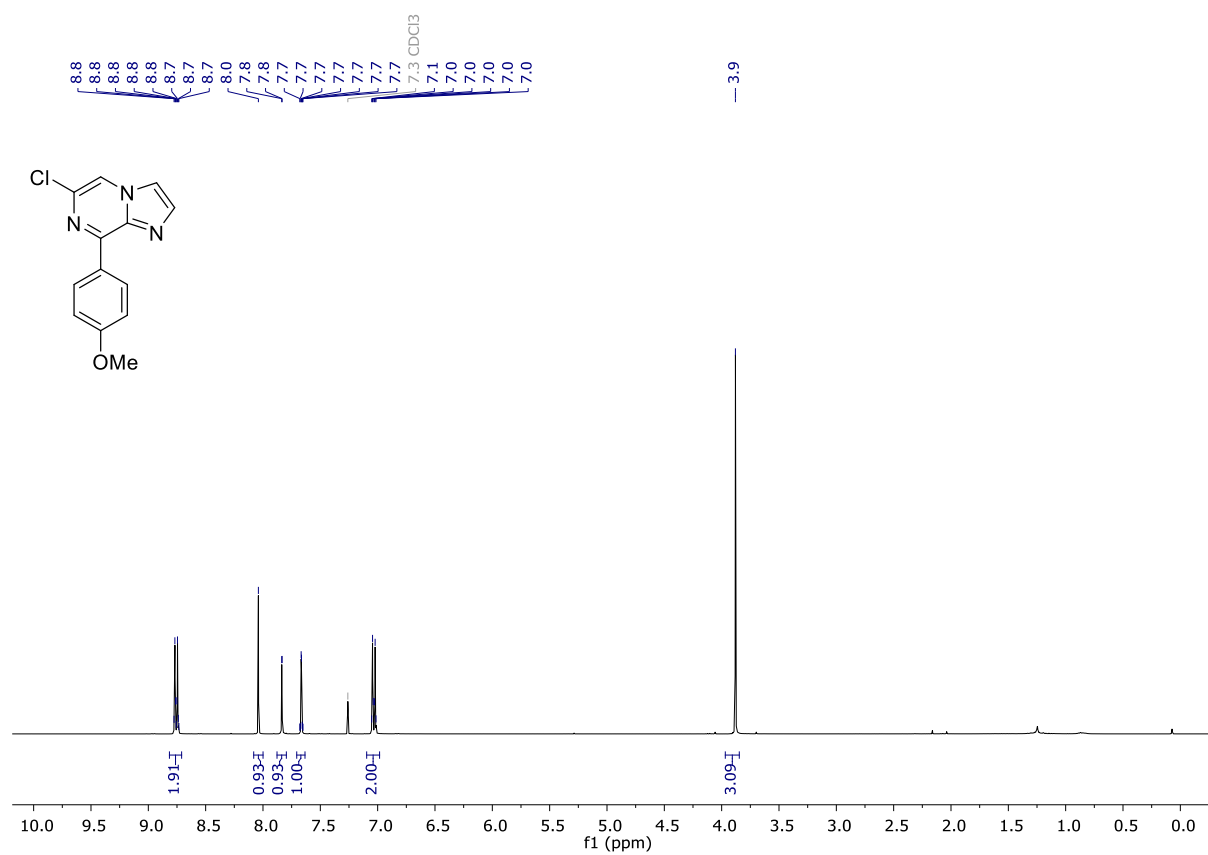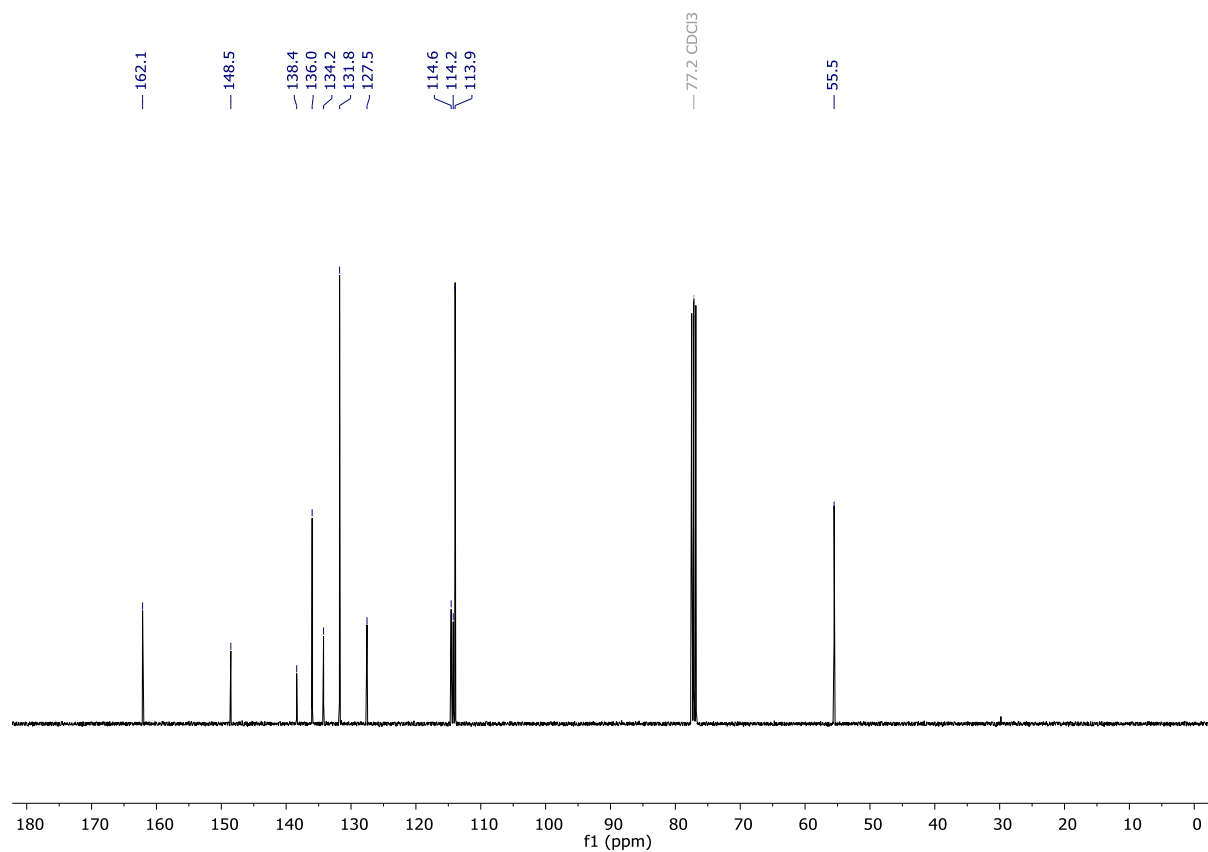

# 4-(6-Chloroimidazo[1,2-a]pyrazin-8-yl)-N,N-dimethylaniline (27b)

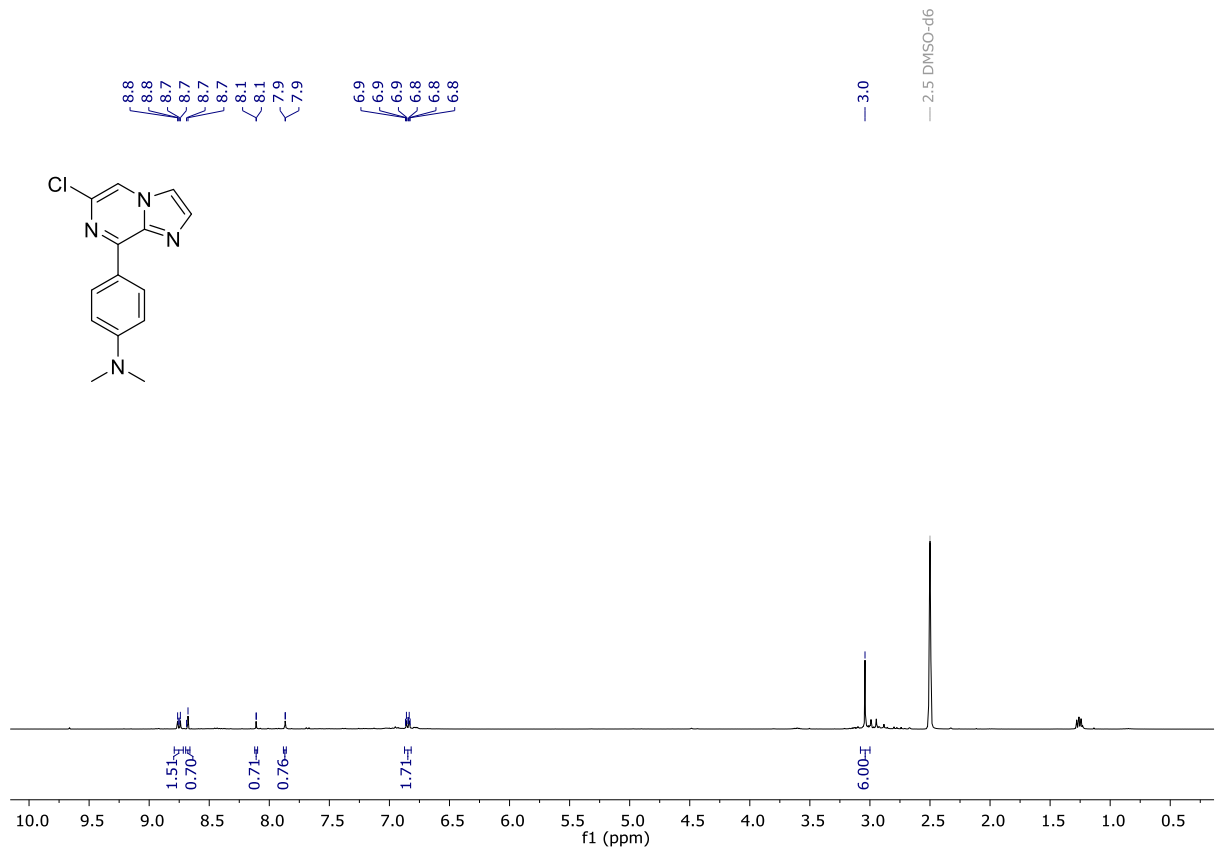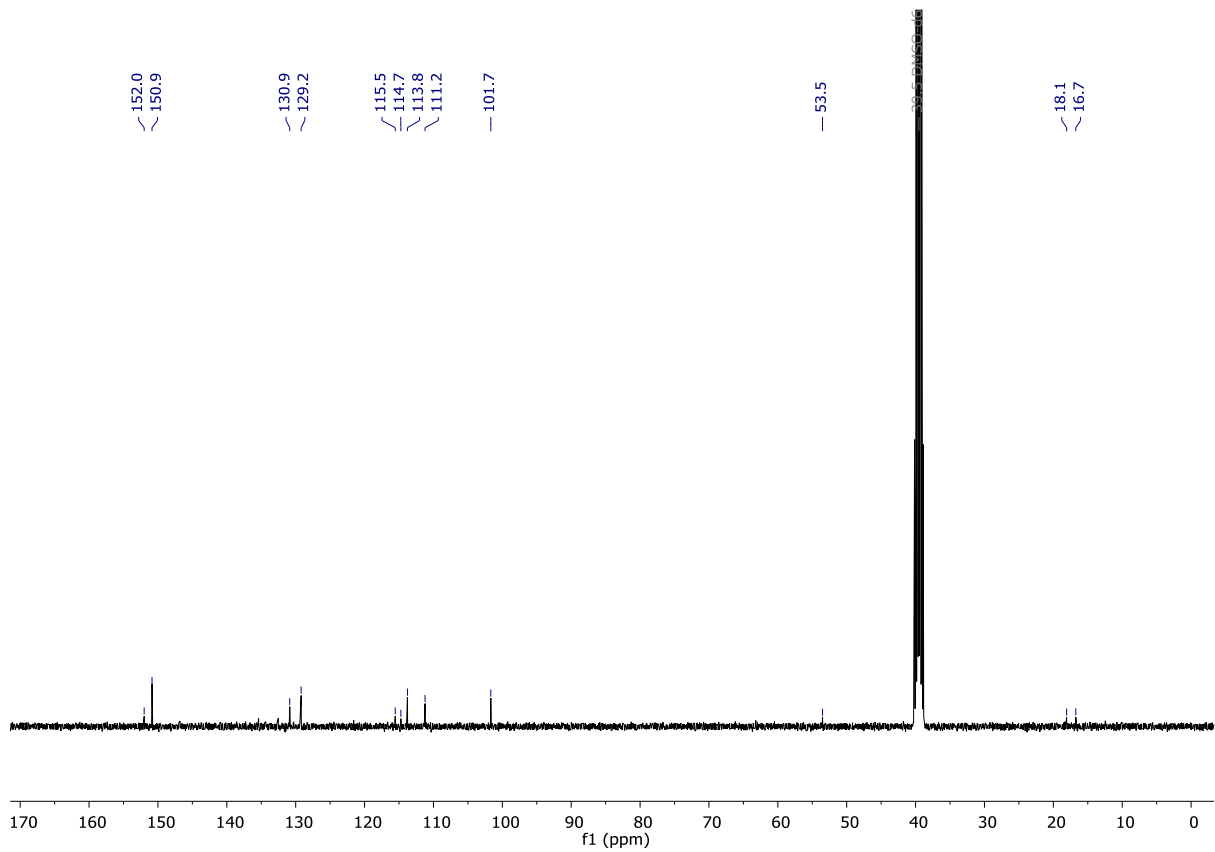

# 6-Chloro-8-(naphthalen-2-yl)imidazo[1,2-a]pyrazine (27c)

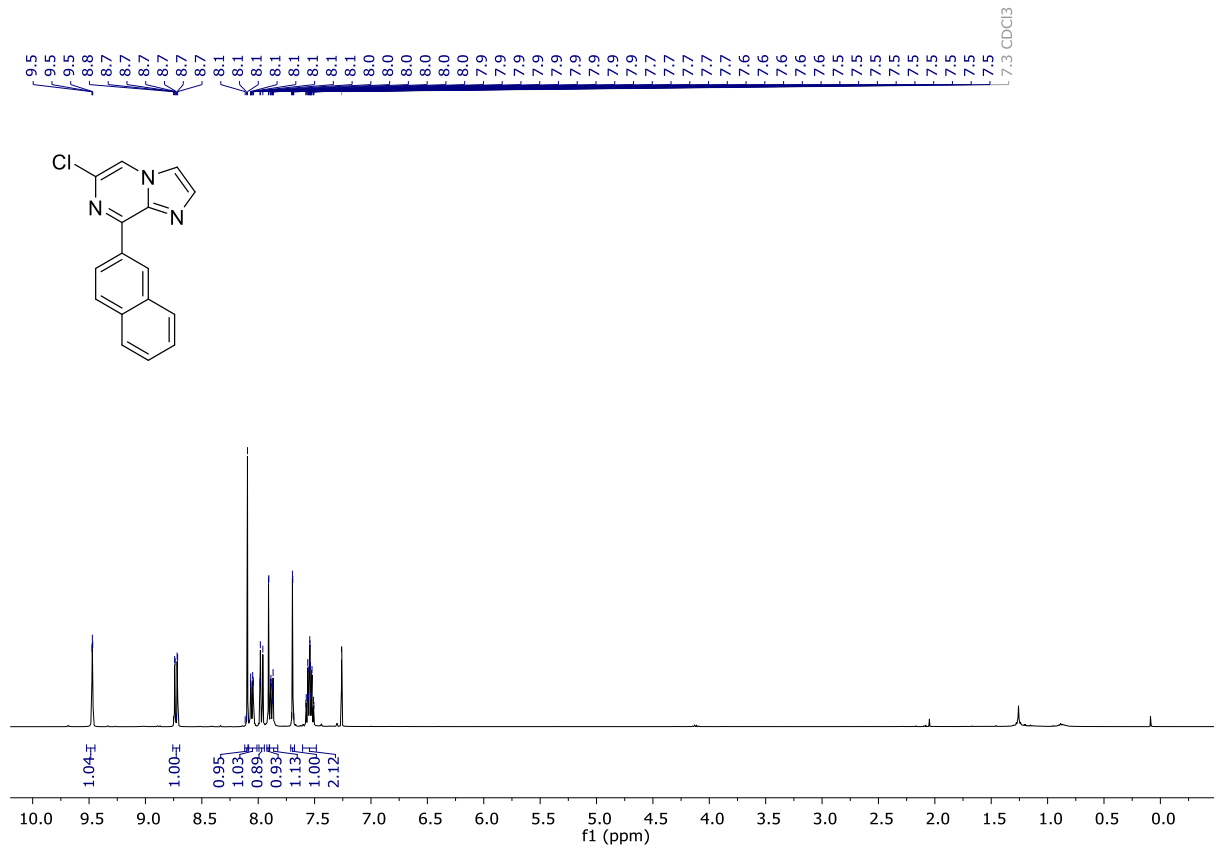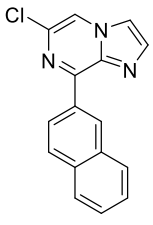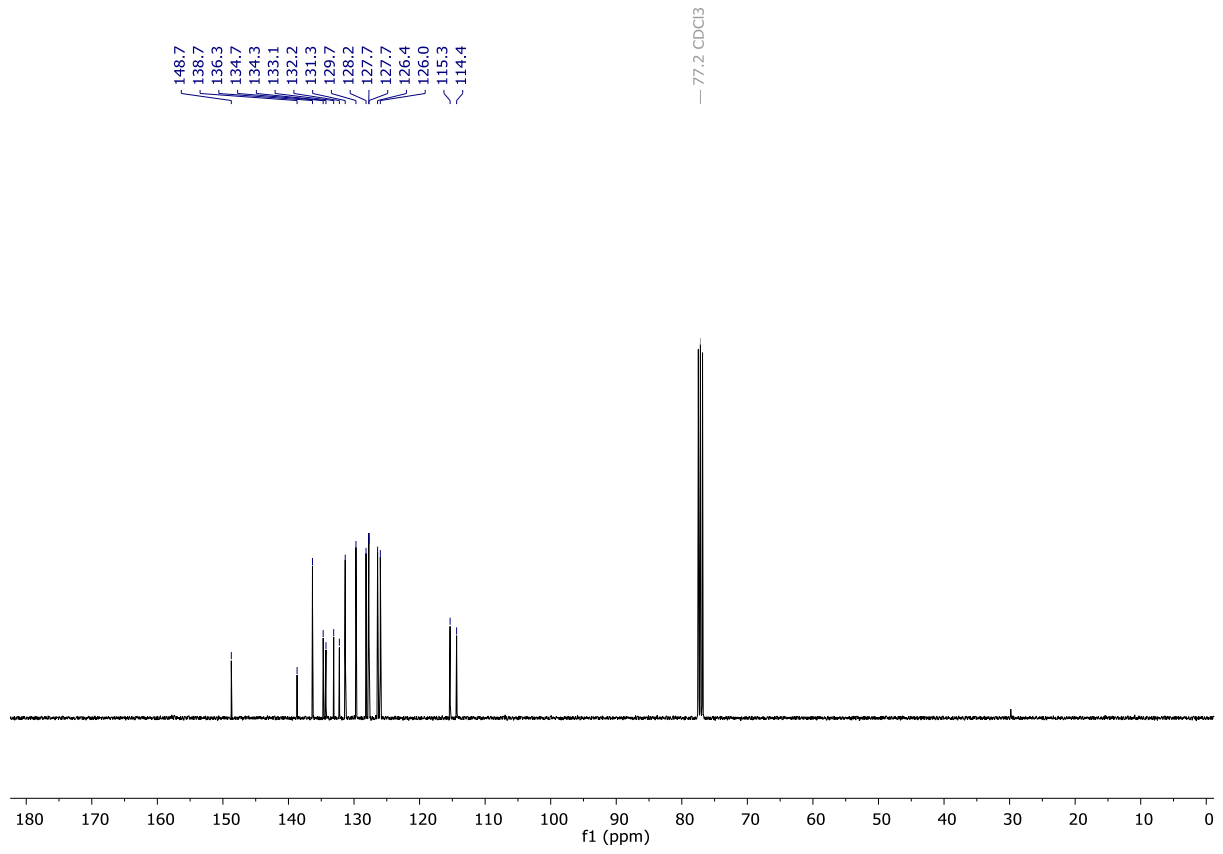

# 6-Chloro-8-(4-fluorophenethyl)imidazo[1,2-a]pyrazine (27d)

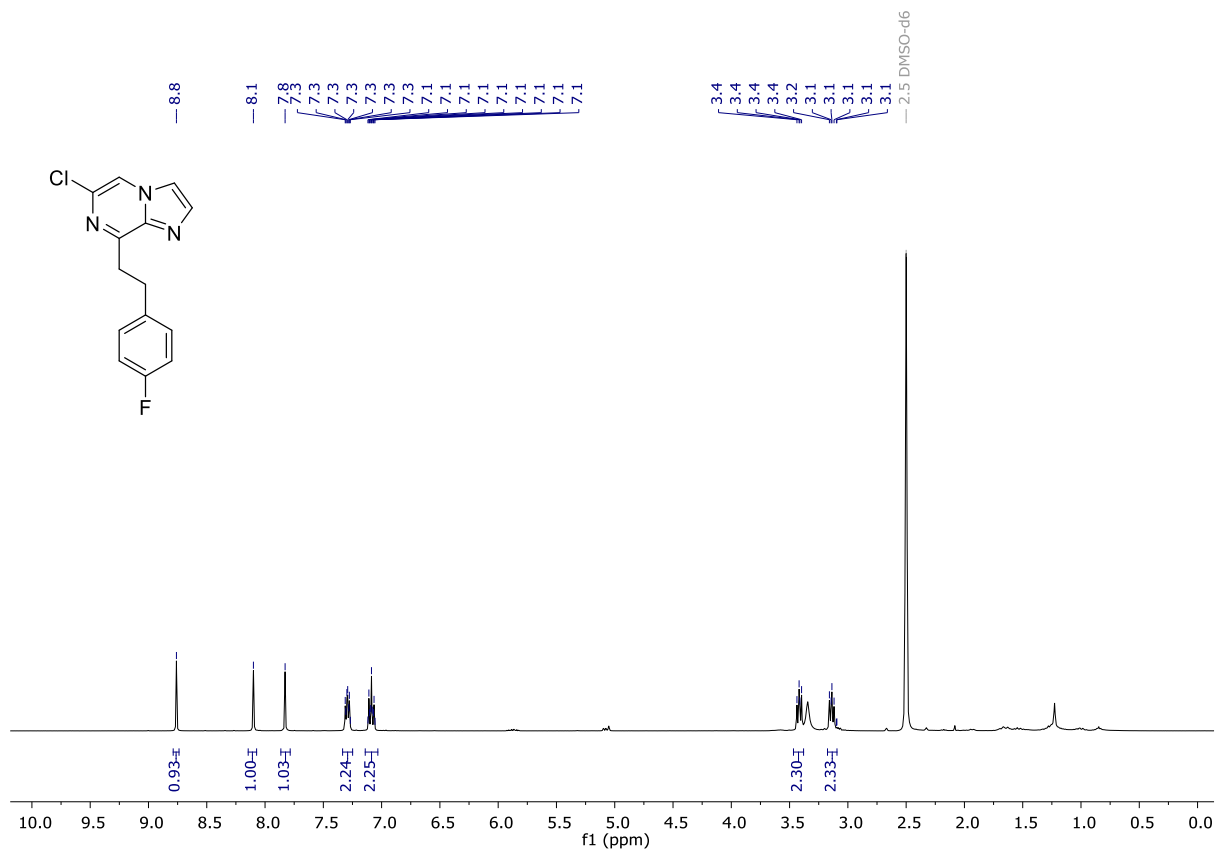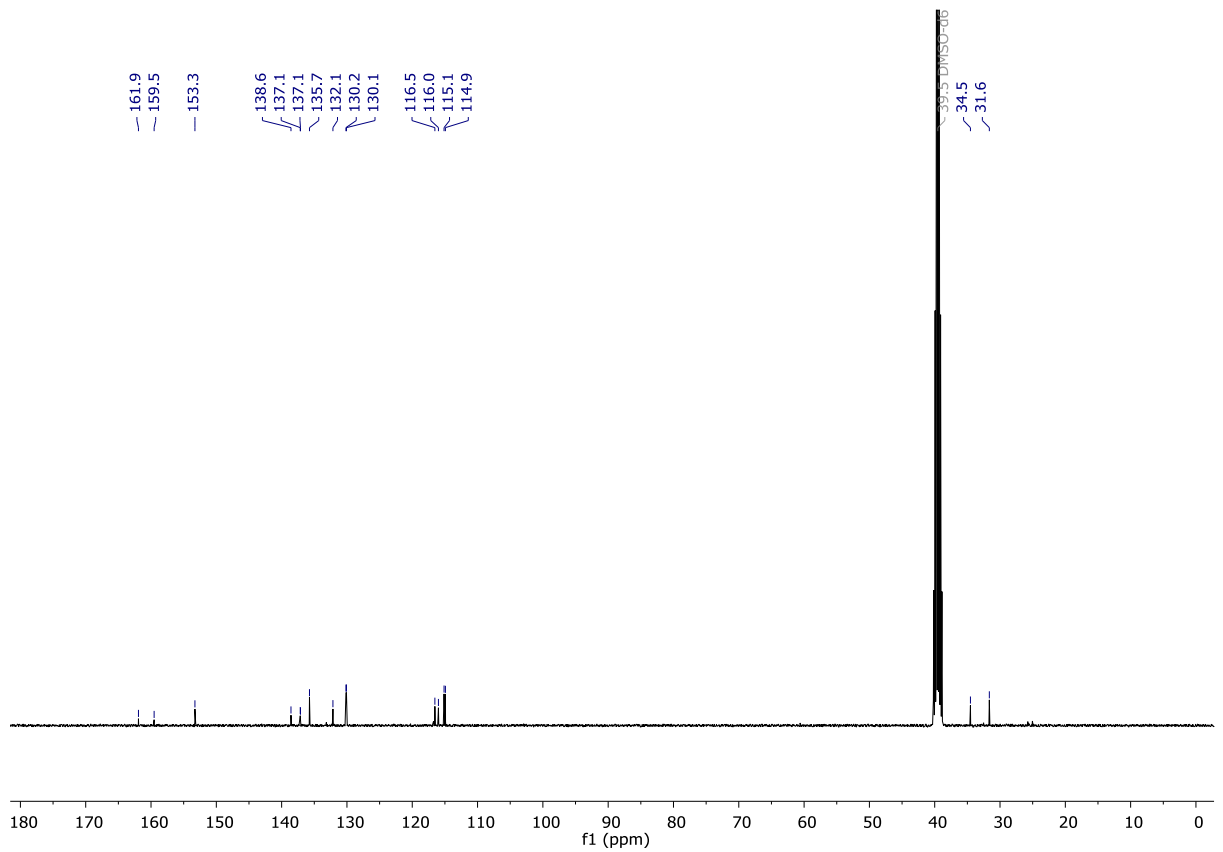

# 8-(*tert*-Butyl)-6-chloroimidazo[1,2-a]pyrazine (27e)

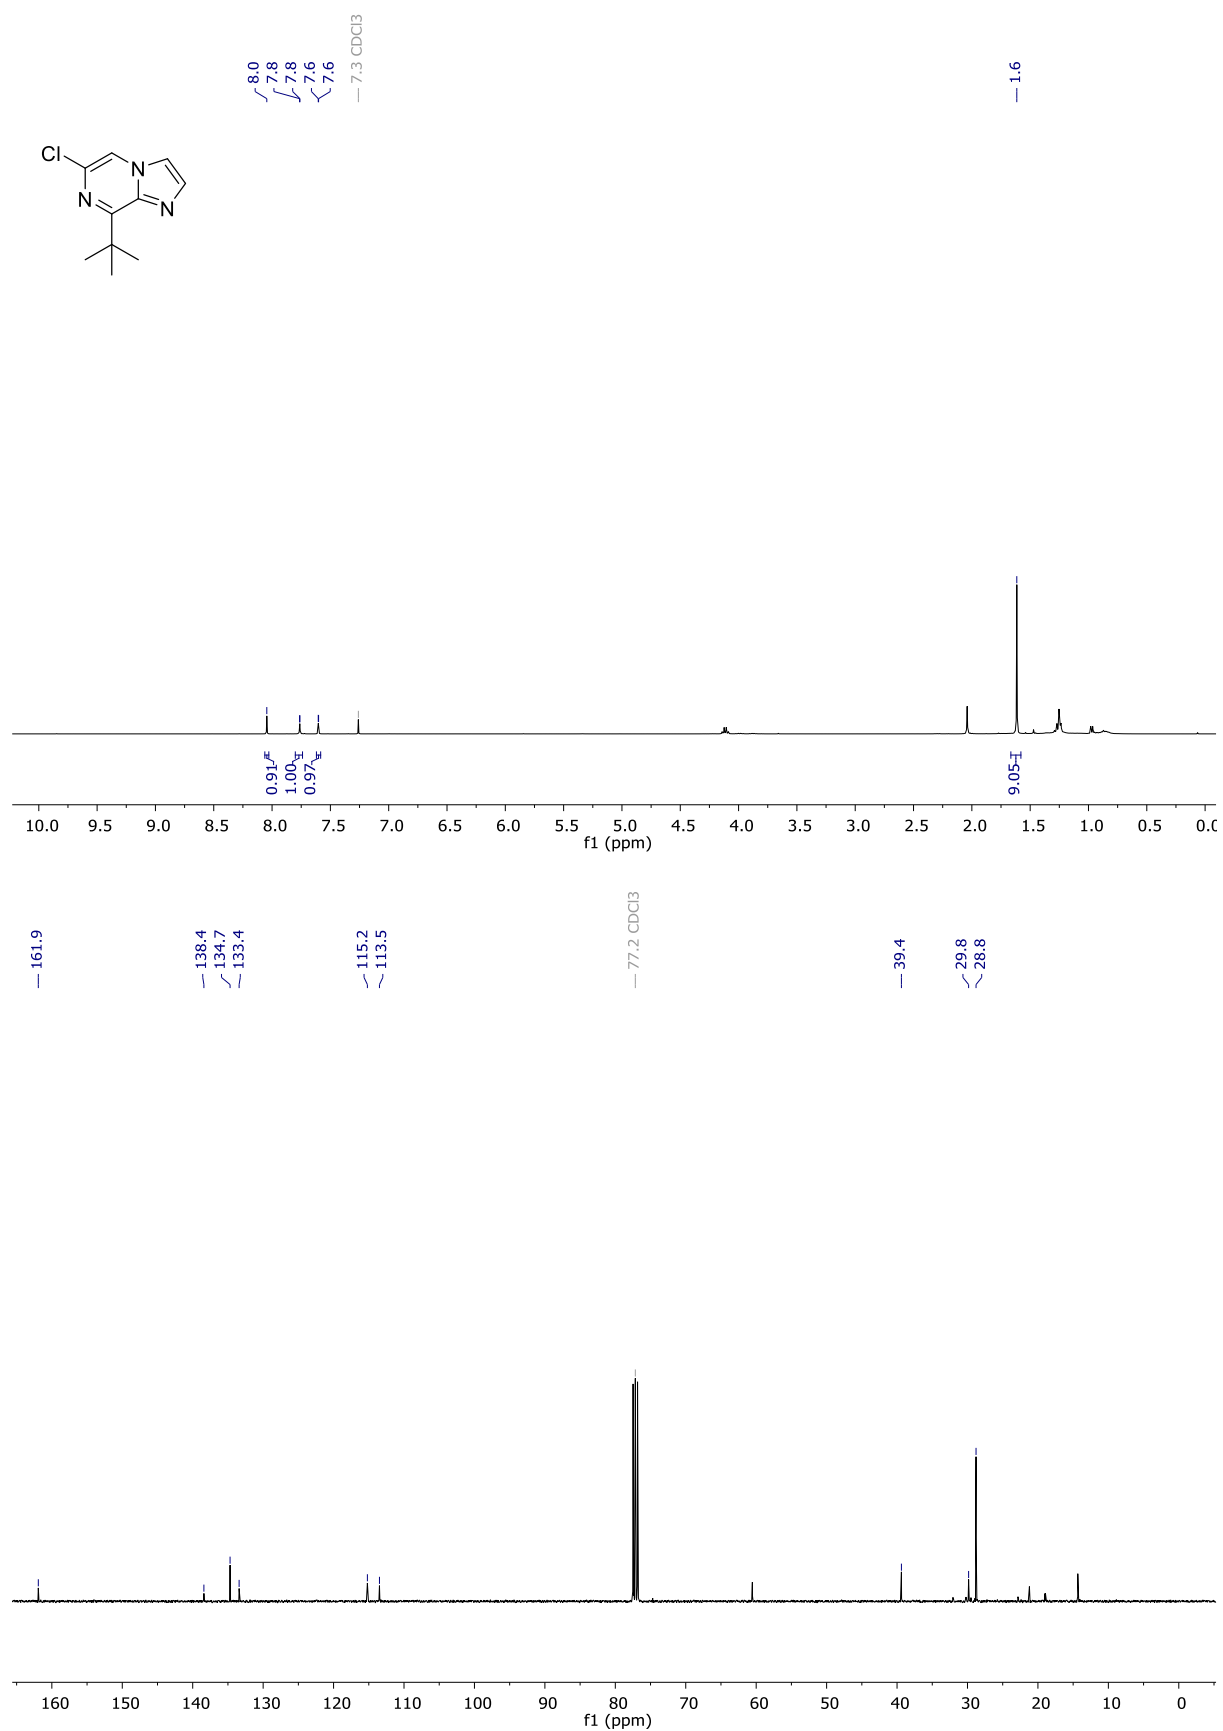

# 6-Chloro-8-(4-methoxyphenyl)-5-(phenylthio)imidazo[1,2-a]pyrazine (27f)

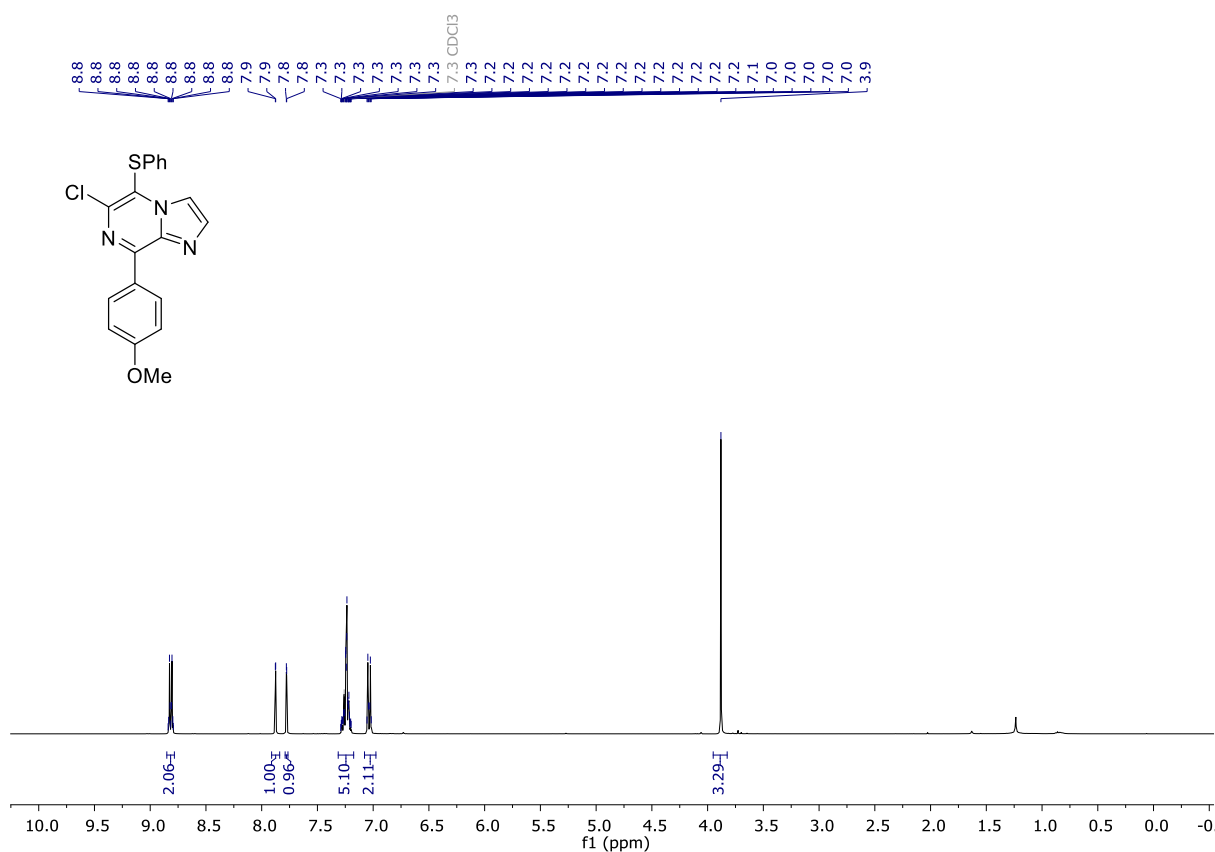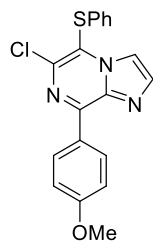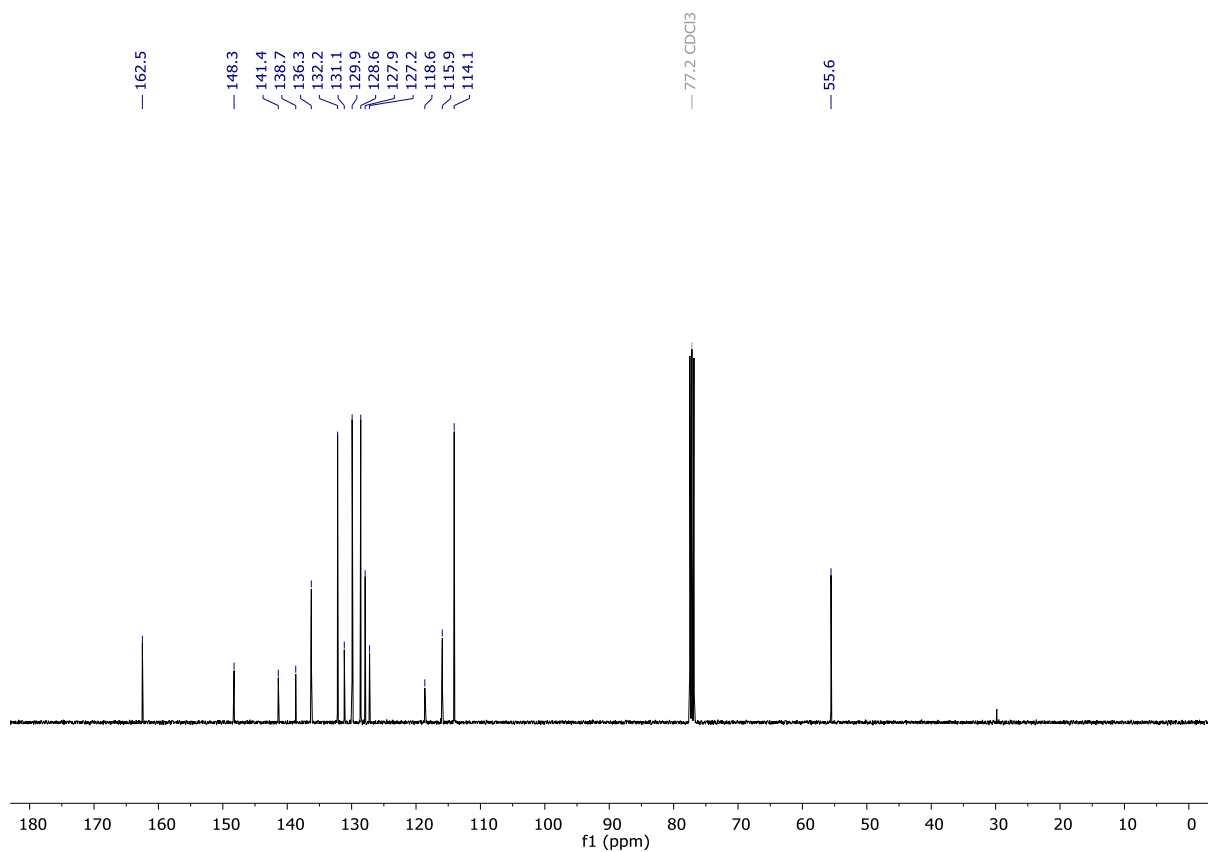



## Details for X-ray data collection and structure refinement

### Single Crystal X-Ray Diffraction Studies

Single crystals of compound **7a**, suitable for X-ray diffraction, were obtained by slow evaporation of CDCl<sub>3</sub> solution. The crystals were introduced into perfluorinated oil and a suitable single crystal was carefully mounted on the top of a thin glass wire. Data collection was performed with an Oxford Xcalibur 3 diffractometer equipped with a Spellman generator (50 kV, 40 mA) and a Kappa CCD detector, operating with Mo-K<sub>α</sub> radiation ( $\lambda = 0.71071 \text{ \AA}$ ).

Data collection and data reduction were performed with the CrysAlisPro software.<sup>7</sup> Absorption correction using the multiscan method<sup>7</sup> was applied. The structures were solved with SHELXS-97,<sup>8</sup> refined with SHELXL-97<sup>9</sup> and finally checked using PLATON.<sup>10</sup> Details for data collection and structure refinement are summarized in Table 1.

CCDC-2258909 contains supplementary crystallographic data for this compound. These data can be obtained free of charge from The Cambridge Crystallographic Data Centre via [www.ccdc.cam.ac.uk/data\\_request/cif](http://www.ccdc.cam.ac.uk/data_request/cif).

**Table 1.** Details for X-ray data collection and structure refinement for compound **1**.

| <b>7a</b>           |                                                 |
|---------------------|-------------------------------------------------|
| Empirical formula   | C <sub>6</sub> H <sub>3</sub> ClIN <sub>3</sub> |
| Formula mass        | 279.46                                          |
| T[K]                | 123(2)                                          |
| Crystal size [mm]   | 0.20 × 0.20 × 0.10                              |
| Crystal description | pale yellow block                               |
| Crystal system      | triclinic                                       |
| Space group         | <i>P</i> -1                                     |
| a [Å]               | 6.0804(3)                                       |

<sup>7</sup> CrysAlis CCD, Oxford Diffraction Ltd., Version 1.171.27p5 beta (release 01-04-2005 CrysAlis171.NET) (compiled Apr 1 2005, 17:53:34); CrysAlis RED, Oxford Diffraction Ltd., Version 1.171.27p5 beta (release 01-04-2005 CrysAlis171.NET) (compiled Apr 1 2005, 17:53:34).

<sup>8</sup> G. M. Sheldrick (1997) SHELXS-97: *Program for Crystal Structure Solution*, University of Göttingen, Germany.

<sup>9</sup> G. M. Sheldrick (1997) SHELXL-97: *Program for the Refinement of Crystal Structures*, University of Göttingen, Germany.

<sup>10</sup> A. L. Spek (1999) PLATON: *A Multipurpose Crystallographic Tool*, Utrecht University, Utrecht, the Netherlands.

---

|                                              |                                                                    |
|----------------------------------------------|--------------------------------------------------------------------|
| b [Å]                                        | 9.9981(5)                                                          |
| c [Å]                                        | 13.2176(7)                                                         |
| $\alpha$ [°]                                 | 78.932(4)                                                          |
| $\beta$ [°]                                  | 86.169(4)                                                          |
| $\gamma$ [°]                                 | 79.771(4)                                                          |
| V [Å <sup>3</sup> ]                          | 775.61(7)                                                          |
| Z                                            | 4                                                                  |
| $\rho_{\text{calcd.}}$ [g cm <sup>-3</sup> ] | 2.393                                                              |
| $\mu$ [mm <sup>-1</sup> ]                    | 4.403                                                              |
| $F(000)$                                     | 520                                                                |
| $\Theta$ range [°]                           | 2.11 – 25.24                                                       |
| Index ranges                                 | -8 $\leq h \leq$ 8<br>-13 $\leq k \leq$ 13<br>-17 $\leq l \leq$ 17 |
| Reflns. collected                            | 13809                                                              |
| Reflns. obsd.                                | 2961                                                               |
| Reflns. unique                               | 3820<br>( $R_{\text{int}} = 0.0464$ )                              |
| $R_1, wR_2$ (2 $\sigma$ data)                | 0.0357, 0.0784                                                     |
| $R_1, wR_2$ (all data)                       | 0.0550, 0.0880                                                     |
| GOOF on $F^2$                                | 1.040                                                              |
| Peak/hole [e Å <sup>-3</sup> ]               | 2.044 / -0.858                                                     |

---

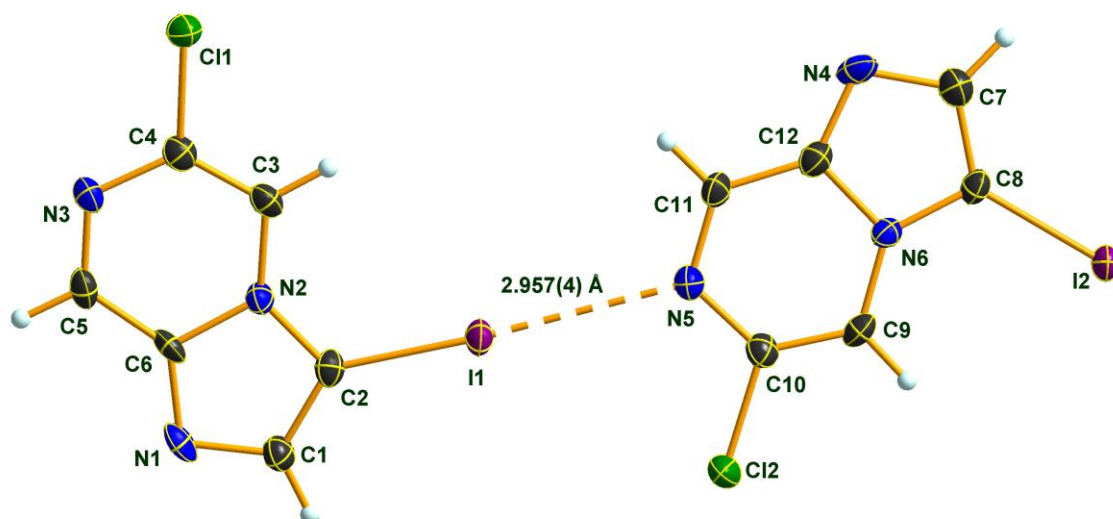

**Figure 1.** Molecular structure of compound **7a** in the crystal. DIAMOND<sup>e</sup>) representation; thermal ellipsoids are drawn at 50 % probability level.

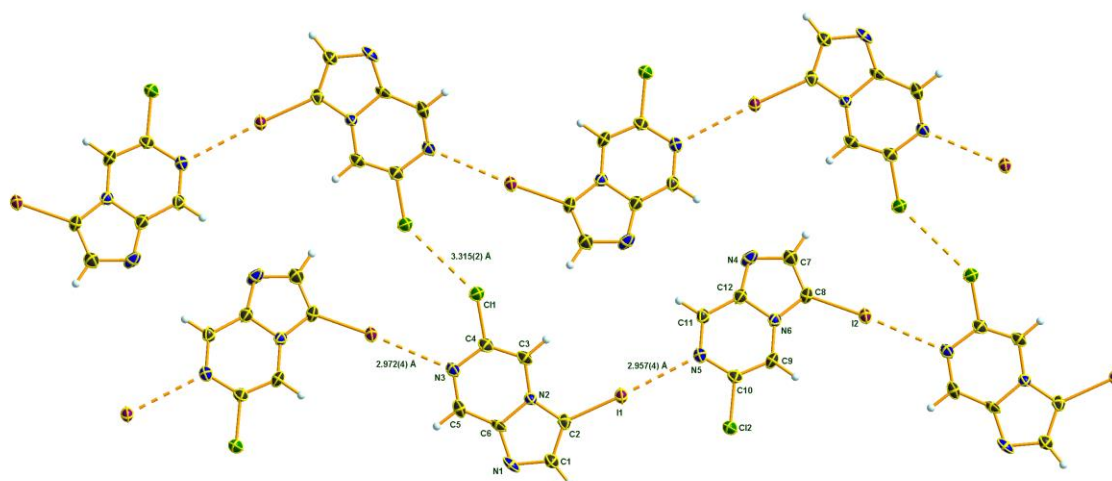

**Figure 2.** Halogen bonding in the crystal structure of compound **7a**. DIAMOND<sup>e</sup>) representation; thermal ellipsoids are drawn at 50 % probability level.

**Table 2.** Selected bond lengths (Å) of compound **7a**.

|           |          |          |          |
|-----------|----------|----------|----------|
| I1 – C2   | 2.076(5) | N5 – C10 | 1.360(7) |
| I2 – C8   | 2.074(5) | N4 – C12 | 1.335(7) |
| Cl1 – C4  | 1.732(5) | N4 – C7  | 1.367(7) |
| Cl2 – C10 | 1.728(5) | C3 – C4  | 1.360(7) |
| N2 – C2   | 1.364(6) | C6 – C5  | 1.427(7) |
| N2 – C3   | 1.372(7) | C2 – C1  | 1.370(7) |

|          |          |           |          |
|----------|----------|-----------|----------|
| N2 – C6  | 1.392(6) | C9 – C10  | 1.349(7) |
| N6 – C8  | 1.354(7) | C11 – C12 | 1.410(8) |
| N6 – C9  | 1.373(7) | C8 – C7   | 1.375(7) |
| N6 – C12 | 1.397(6) | N1 – C1   | 1.342(7) |
| N3 – C5  | 1.311(7) | N1 – C6   | 1.356(7) |
| N3 – C4  | 1.364(7) | N5 – C11  | 1.316(7) |

**Table 3.** Selected bond angles (°) of compound **7a**.

|                |          |                |          |
|----------------|----------|----------------|----------|
| C2 – N2 – C3   | 132.3(5) | C9 – C10 – N5  | 124.9(5) |
| C2 – N2 – C6   | 105.8(4) | C9 – C10 – C12 | 118.7(4) |
| C3 – N2 – C6   | 121.8(4) | N5 – C10 – C12 | 116.3(4) |
| C8 – N6 – C9   | 132.5(4) | N1 – C1 – C2   | 113.4(5) |
| C8 – N6 – C12  | 106.8(4) | N5 – C11 – C12 | 122.8(5) |
| C9 – N6 – C12  | 120.6(5) | N6 – C8 – C7   | 105.9(4) |
| C5 – N3 – C4   | 117.5(5) | N6 – C8 – I2   | 122.3(4) |
| C1 – N1 – C6   | 103.3(4) | C7 – C8 – I2   | 131.7(4) |
| C11 – N5 – C10 | 117.3(5) | N3 – C5 – C6   | 122.5(5) |
| C12 – N4 – C7  | 104.4(4) | N4 – C12 – N6  | 111.1(5) |
| C4 – C3 – N2   | 116.3(5) | N4 – C12 – C11 | 131.9(5) |
| N1 – C6 – N2   | 111.7(5) | N6 – C12 – C11 | 117.0(5) |
| N1 – C6 – C5   | 131.7(5) | N4 – C7 – C8   | 111.8(5) |
| N2 – C6 – C5   | 116.5(5) | C3 – C4 – N3   | 125.3(5) |
| N2 – C2 – C1   | 105.7(4) | C3 – C4 – C11  | 118.0(4) |
| N2 – C2 – I1   | 121.6(4) | N3 – C4 – C11  | 116.7(4) |
| C1 – C2 – I1   | 132.5(4) | C10 – C9 – N6  | 117.4(5) |

**Table 4.** Selected torsion angles (°) of compound **7a**.

|                    |           |                      |           |
|--------------------|-----------|----------------------|-----------|
| C2 – N2 – C3 – C4  | -177.5(5) | C6 – N1 – C1 – C2    | -1.0(6)   |
| C6 – N2 – C3 – C4  | 0.5(7)    | N2 – C2 – C1 – N1    | 0.5(6)    |
| C1 – N1 – C6 – N2  | 1.1(6)    | I1 – C2 – C1 – N1    | 176.0(4)  |
| C1 – N1 – C6 – C5  | -177.8(6) | C10 – N5 – C11 – C12 | 2.2(8)    |
| C2 – N2 – C6 – N1  | -0.9(6)   | C9 – N6 – C8 – C7    | 176.8(5)  |
| C3 – N2 – C6 – N1  | -179.3(4) | C12 – N6 – C8 – C7   | -0.9(6)   |
| C2 – N2 – C6 – C5  | 178.2(5)  | C9 – N6 – C8 – I2    | 0.7(8)    |
| C3 – N2 – C6 – C5  | -0.2(7)   | C12 – N6 – C8 – I2   | -177.0(4) |
| C3 – N2 – C2 – C1  | 178.4(5)  | C4 – N3 – C5 – C6    | 0.7(8)    |
| C6 – N2 – C2 – C1  | 0.2(6)    | N1 – C6 – C5 – N3    | 178.4(5)  |
| C3 – N2 – C2 – I1  | 2.3(8)    | N2 – C6 – C5 – N3    | -0.4(8)   |
| C6 – N2 – C2 – I1  | -175.9(3) | C7 – N4 – C12 – N6   | 1.7(6)    |
| N2 – C3 – C4 – N3  | -0.2(8)   | C7 – N4 – C12 – C11  | -178.8(6) |
| N2 – C3 – C4 – C11 | 178.3(4)  | C8 – N6 – C12 – N4   | -0.5(6)   |

|                      |           |                     |           |
|----------------------|-----------|---------------------|-----------|
| C5 – N3 – C4 – C3    | -0.4(8)   | C9 – N6 – C12 – N4  | -178.6(5) |
| C5 – N3 – C4 – Cl1   | -178.9(4) | C8 – N6 – C12 – C11 | 179.9(5)  |
| C8 – N6 – C9 – C10   | -177.9(5) | C9 – N6 – C12 – C11 | 1.8(7)    |
| C12 – N6 – C9 – C10  | -0.4(7)   | N5 – C11 – C12 – N4 | 177.7(6)  |
| N6 – C9 – C10 – N5   | -0.3(8)   | N5 – C11 – C12 – N6 | -2.8(8)   |
| N6 – C9 – C10 – Cl2  | 177.5(4)  | C12 – N4 – C7 – C8  | -2.3(6)   |
| C11 – N5 – C10 – C9  | -0.6(8)   | N6 – C8 – C7 – N4   | 2.1(6)    |
| C11 – N5 – C10 – Cl2 | -178.4(4) | I2 – C8 – C7 – N4   | 177.6(4)  |

Single crystals of compound **8b**, suitable for X-ray diffraction, were obtained by slow evaporation of CHCl<sub>3</sub> solution. The crystals were introduced into perfluorinated oil and a suitable single crystal was carefully mounted on the top of a thin glass wire. Data collection was performed with an Oxford Xcalibur 3 diffractometer equipped with a Spellman generator (50 kV, 40 mA) and a Kappa CCD detector, operating with Mo-K<sub>α</sub> radiation ( $\lambda = 0.71071 \text{ \AA}$ ).

CCDC-2258910 contains supplementary crystallographic data for this compound. These data can be obtained free of charge from The Cambridge Crystallographic Data Centre via [www.ccdc.cam.ac.uk/data\\_request/cif](http://www.ccdc.cam.ac.uk/data_request/cif).

**Table 1.** Details for X-ray data collection and structure refinement for compound **8b**.

| <b>8b</b>           |                                                |
|---------------------|------------------------------------------------|
| Empirical formula   | C <sub>9</sub> H <sub>8</sub> ClN <sub>3</sub> |
| Formula mass        | 193.63                                         |
| T[K]                | 123(2)                                         |
| Crystal size [mm]   | 0.40 × 0.20 × 0.05                             |
| Crystal description | colorless block                                |
| Crystal system      | monoclinic                                     |
| Space group         | <i>P</i> 21/ <i>c</i>                          |
| a [Å]               | 13.2253(10)                                    |
| b [Å]               | 7.3421(4)                                      |
| c [Å]               | 9.4392(6)                                      |
| $\alpha$ [°]        | 90.0                                           |
| $\beta$ [°]         | 106.538(7)                                     |
| $\gamma$ [°]        | 90.0                                           |

|                                              |                                                                    |
|----------------------------------------------|--------------------------------------------------------------------|
| $V$ [Å <sup>3</sup> ]                        | 878.64(10)                                                         |
| $Z$                                          | 4                                                                  |
| $\rho_{\text{calcd.}}$ [g cm <sup>-3</sup> ] | 1.464                                                              |
| $\mu$ [mm <sup>-1</sup> ]                    | 0.385                                                              |
| $F(000)$                                     | 400                                                                |
| $\Theta$ range [°]                           | 3.21 – 25.24                                                       |
| Index ranges                                 | $-17 \leq h \leq 17$<br>$-9 \leq k \leq 9$<br>$-12 \leq l \leq 12$ |
| Reflns. collected                            | 14527                                                              |
| Reflns. obsd.                                | 1735                                                               |
| Reflns. unique                               | 2173<br>( $R_{\text{int}} = 0.0629$ )                              |
| $R_1, wR_2$ (2 $\sigma$ data)                | 0.0432, 0.1053                                                     |
| $R_1, wR_2$ (all data)                       | 0.0573, 0.1163                                                     |
| GOOF on $F^2$                                | 1.060                                                              |
| Peak/hole [e Å <sup>-3</sup> ]               | 0.416 / -0.222                                                     |

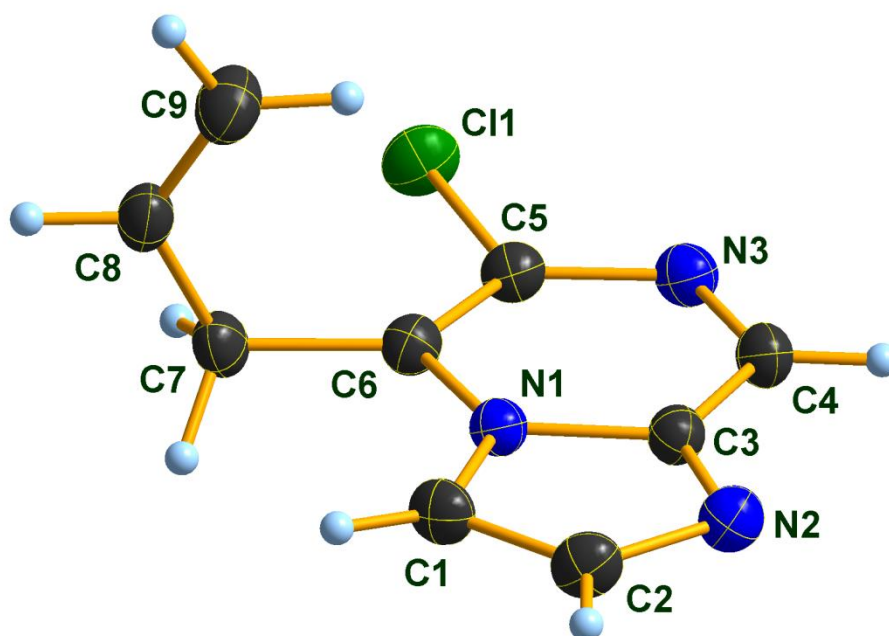

**Figure 1.** Molecular structure of compound **8b** in the crystal. DIAMOND<sup>11</sup> representation; thermal ellipsoids are drawn at 50 % probability level.

**Table 2.** Selected bond lengths (Å) of compound **8b**.

<sup>11</sup> DIAMOND, Crystal Impact GbR., Version 3.2i.

|          |          |         |          |
|----------|----------|---------|----------|
| Cl1 – C5 | 1.746(2) | N3 – C5 | 1.363(2) |
| N1 – C1  | 1.372(2) | C6 – C5 | 1.360(3) |
| N1 – C6  | 1.386(2) | C6 – C7 | 1.502(2) |
| N1 – C3  | 1.400(2) | C7 – C8 | 1.500(3) |
| C1 – C2  | 1.373(3) | C8 – C9 | 1.309(3) |
| C2 – N2  | 1.362(2) | C3 – C4 | 1.410(3) |
| N2 – C3  | 1.329(2) | N3 – C4 | 1.314(2) |

**Table 3.** Selected bond angles (°) of compound **8b**.

|              |          |               |          |
|--------------|----------|---------------|----------|
| C1 – N1 – C6 | 131.6(2) | C6 – C5 – N3  | 127.0(2) |
| C1 – N1 – C3 | 106.6(1) | C6 – C5 – Cl1 | 119.5(1) |
| C6 – N1 – C3 | 121.8(2) | N3 – C5 – Cl1 | 113.4(1) |
| N1 – C1 – C2 | 105.1(2) | C8 – C7 – C6  | 114.8(2) |
| N2 – C2 – C1 | 112.4(2) | C9 – C8 – C7  | 126.7(2) |
| C3 – N2 – C2 | 104.7(2) | C5 – C6 – N1  | 114.6(2) |
| N2 – C3 – N1 | 111.2(2) | C5 – C6 – C7  | 127.6(2) |
| N2 – C3 – C4 | 131.7(2) | N1 – C6 – C7  | 117.7(2) |
| N1 – C3 – C4 | 117.1(2) | N3 – C4 – C3  | 122.8(2) |
| C4 – N3 – C5 | 116.6(2) |               |          |

**Table 4.** Selected torsion angles (°) of compound **8b**.

|                   |           |                    |           |
|-------------------|-----------|--------------------|-----------|
| C6 – N1 – C1 – C2 | -179.3(2) | C3 – N1 – C6 – C7  | 179.7(1)  |
| C3 – N1 – C1 – C2 | 0.3(2)    | C5 – N3 – C4 – C3  | -0.3(3)   |
| N1 – C1 – C2 – N2 | -0.4(2)   | N2 – C3 – C4 – N3  | -179.0(2) |
| C1 – C2 – N2 – C3 | 0.3(2)    | N1 – C3 – C4 – N3  | 0.7(3)    |
| C2 – N2 – C3 – N1 | -0.1(2)   | N1 – C6 – C5 – N3  | 1.1(3)    |
| C2 – N2 – C3 – C4 | 179.6(2)  | C7 – C6 – C5 – N3  | -179.2(2) |
| C1 – N1 – C3 – N2 | -0.1(2)   | N1 – C6 – C5 – Cl1 | -178.8(1) |
| C6 – N1 – C3 – N2 | 179.5(1)  | C7 – C6 – C5 – Cl1 | 1.0(3)    |
| C1 – N1 – C3 – C4 | -179.9(1) | C4 – N3 – C5 – C6  | -0.6(3)   |
| C6 – N1 – C3 – C4 | -0.2(2)   | C4 – N3 – C5 – Cl1 | 179.2(1)  |
| C1 – N1 – C6 – C5 | 179.0(2)  | C5 – C6 – C7 – C8  | -101.0(2) |
| C3 – N1 – C6 – C5 | -0.6(2)   | N1 – C6 – C7 – C8  | 78.7(2)   |
| C1 – N1 – C6 – C7 | -0.8(3)   | C6 – C7 – C8 – C9  | 3.7(3)    |

Single crystals of compound **16a**, suitable for X-ray diffraction, were obtained by slow evaporation of  $\text{CHCl}_3$  solution. The crystals were introduced into perfluorinated oil and a suitable single crystal was carefully mounted on the top of a thin glass wire. Data collection was performed with an D8 Venture diffractometer equipped with a Bruker D8 Venture TXS rotating anode X-ray tube operating with Mo- $K_\alpha$  radiation ( $\lambda = 0.71073 \text{ \AA}$ ) and a multilayer mirror optics monochromator.

CCDC-2258912 contains supplementary crystallographic data for this compound. These data can be obtained free of charge from The Cambridge Crystallographic Data Centre via [www.ccdc.cam.ac.uk/data\\_request/cif](http://www.ccdc.cam.ac.uk/data_request/cif).

**Table 5.** Details for X-ray data collection and structure refinement for compound **16a**.

| <b>16a</b>                                                |                                                                 |
|-----------------------------------------------------------|-----------------------------------------------------------------|
| Empirical formula                                         | C <sub>7</sub> H <sub>2</sub> ClIN <sub>4</sub>                 |
| Formula mass                                              | 304.48                                                          |
| T[K]                                                      | 173(2)                                                          |
| Crystal size [mm]                                         | 0.10 × 0.08 × 0.02                                              |
| Crystal description                                       | colorless platelet                                              |
| Crystal system                                            | monoclinic                                                      |
| Space group                                               | <i>P</i> 21/ <i>n</i>                                           |
| a [Å]                                                     | 8.2171(2)                                                       |
| b [Å]                                                     | 5.69960(10)                                                     |
| c [Å]                                                     | 18.6448(5)                                                      |
| α [°]                                                     | 90.0                                                            |
| β [°]                                                     | 99.8020(10)                                                     |
| γ [°]                                                     | 90.0                                                            |
| V [Å <sup>3</sup> ]                                       | 860.47(3)                                                       |
| Z                                                         | 4                                                               |
| ρ <sub>calcd.</sub> [g cm <sup>-3</sup> ]                 | 2.350                                                           |
| μ [mm <sup>-1</sup> ]                                     | 3.983                                                           |
| <i>F</i> (000)                                            | 568                                                             |
| Θ range [°]                                               | 3.74 – 25.24                                                    |
| Index ranges                                              | -11 ≤ <i>h</i> ≤ 11<br>-8 ≤ <i>k</i> ≤ 8<br>-26 ≤ <i>l</i> ≤ 26 |
| Reflns. collected                                         | 18326                                                           |
| Reflns. obsd.                                             | 2296                                                            |
| Reflns. unique                                            | 2609<br>( <i>R</i> <sub>int</sub> = 0.0344)                     |
| <i>R</i> <sub>1</sub> , <i>wR</i> <sub>2</sub> (2σ data)  | 0.0184, 0.0369                                                  |
| <i>R</i> <sub>1</sub> , <i>wR</i> <sub>2</sub> (all data) | 0.0230, 0.0386                                                  |



|                                    |                |
|------------------------------------|----------------|
| GOOF on $F^2$                      | 1.053          |
| Peak/hole [ $e \text{ \AA}^{-3}$ ] | 0.457 / -0.397 |

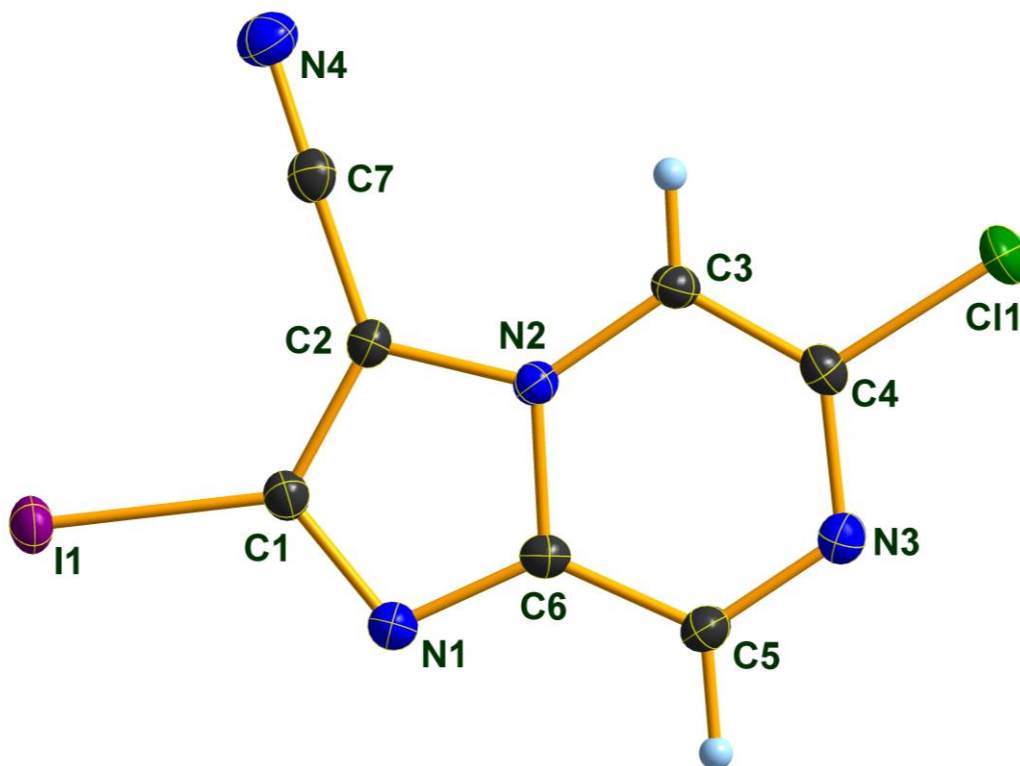

**Figure 2.** Molecular structure of compound **16a** in the crystal. DIAMOND<sup>13</sup> representation; thermal ellipsoids are drawn at 50 % probability level.

**Table 6.** Selected bond lengths ( $\text{\AA}$ ) of compound **16a**.

|          |          |         |          |
|----------|----------|---------|----------|
| I1 – C1  | 2.070(2) | N2 – C6 | 1.385(2) |
| N1 – C6  | 1.347(2) | C4 – N3 | 1.355(2) |
| N1 – C1  | 1.348(2) | C4 – C3 | 1.361(2) |
| C1 – C2  | 1.392(2) | N4 – C7 | 1.149(2) |
| Cl1 – C4 | 1.719(2) | C6 – C5 | 1.411(2) |
| C2 – N2  | 1.377(2) | N3 – C5 | 1.316(2) |
| C2 – C7  | 1.418(2) | N2 – C3 | 1.366(2) |

**Table 7.** Selected bond angles ( $^\circ$ ) of compound **16a**.

|              |          |               |          |
|--------------|----------|---------------|----------|
| C6 – N1 – C1 | 104.9(1) | C3 – C4 – Cl1 | 118.3(1) |
| N1 – C1 – C2 | 111.7(2) | N1 – C6 – N2  | 111.7(2) |
| N1 – C1 – I1 | 122.7(1) | N1 – C6 – C5  | 131.0(2) |
| C2 – C1 – I1 | 125.6(1) | N2 – C6 – C5  | 117.3(2) |
| N2 – C2 – C1 | 105.6(1) | C4 – C3 – N2  | 116.2(2) |
| N2 – C2 – C7 | 122.4(2) | C5 – N3 – C4  | 117.6(2) |

|              |          |               |          |
|--------------|----------|---------------|----------|
| C1 – C2 – C7 | 131.8(2) | N3 – C5 – C6  | 122.1(2) |
| C3 – N2 – C2 | 132.1(2) | N4 – C7 – C2  | 177.4(2) |
| C3 – N2 – C6 | 121.7(2) | N3 – C4 – C3  | 125.2(2) |
| C2 – N2 – C6 | 106.2(1) | N3 – C4 – Cl1 | 116.5(1) |

**Table 8.** Selected torsion angles (°) of compound **16a**.

|                   |           |                    |           |
|-------------------|-----------|--------------------|-----------|
| C6 – N1 – C1 – C2 | -0.5(2)   | C2 – N2 – C6 – N1  | -0.6(2)   |
| C6 – N1 – C1 – I1 | 178.3(1)  | C3 – N2 – C6 – C5  | -0.5(2)   |
| N1 – C1 – C2 – N2 | 0.2(2)    | C2 – N2 – C6 – C5  | 177.3(2)  |
| I1 – C1 – C2 – N2 | -178.6(1) | N3 – C4 – C3 – N2  | 0.3(3)    |
| N1 – C1 – C2 – C7 | 175.3(2)  | Cl1 – C4 – C3 – N2 | -179.4(1) |
| I1 – C1 – C2 – C7 | -3.5(3)   | C2 – N2 – C3 – C4  | -176.8(2) |
| C1 – C2 – N2 – C3 | 177.7(2)  | C6 – N2 – C3 – C4  | 0.4(2)    |
| C7 – C2 – N2 – C3 | 2.1(3)    | C3 – C4 – N3 – C5  | -0.8(3)   |
| C1 – C2 – N2 – C6 | 0.2(2)    | Cl1 – C4 – N3 – C5 | 178.9(1)  |
| C7 – C2 – N2 – C6 | -175.5(2) | C4 – N3 – C5 – C6  | 0.7(3)    |
| C1 – N1 – C6 – N2 | 0.6(2)    | N1 – C6 – C5 – N3  | 177.3(2)  |
| C1 – N1 – C6 – C5 | -176.9(2) | N2 – C6 – C5 – N3  | 0.0(3)    |
| C3 – N2 – C6 – N1 | -178.4(2) |                    |           |

Single crystals of compound **18a**, suitable for X-ray diffraction, were obtained by slow evaporation of CHCl<sub>3</sub> solution. The crystals were introduced into perfluorinated oil and a suitable single crystal was carefully mounted on the top of a thin glass wire. Data collection was performed with an D8 Venture diffractometer equipped with a Bruker D8 Venture TXS rotating anode X-ray tube operating with Mo-K<sub>α</sub> radiation ( $\lambda = 0.71073 \text{ \AA}$ ) and a multilayer mirror optics monochromator.

CCDC-2258911 contains supplementary crystallographic data for this compound. These data can be obtained free of charge from The Cambridge Crystallographic Data Centre via [www.ccdc.cam.ac.uk/data\\_request/cif](http://www.ccdc.cam.ac.uk/data_request/cif).

**Table 1.** Details for X-ray data collection and structure refinement for compound **18a**.

| <b>18a</b>          |                                                    |
|---------------------|----------------------------------------------------|
| Empirical formula   | C <sub>14</sub> H <sub>8</sub> ClIN <sub>4</sub> O |
| Formula mass        | 410.59                                             |
| T[K]                | 173(2)                                             |
| Crystal size [mm]   | 0.40 × 0.20 × 0.15                                 |
| Crystal description | colorless block                                    |

---

|                                                           |                                     |
|-----------------------------------------------------------|-------------------------------------|
| Crystal system                                            | triclinic                           |
| Space group                                               | <i>P</i> -1                         |
| a [Å]                                                     | 8.9084(3)                           |
| b [Å]                                                     | 8.9556(3)                           |
| c [Å]                                                     | 9.5787(3)                           |
| α [°]                                                     | 75.6990(10)                         |
| β [°]                                                     | 74.5870(10)                         |
| γ [°]                                                     | 80.1380(10)                         |
| V [Å <sup>3</sup> ]                                       | 709.30(4)                           |
| Z                                                         | 2                                   |
| ρ <sub>calcd.</sub> [g cm <sup>-3</sup> ]                 | 1.922                               |
| μ [mm <sup>-1</sup> ]                                     | 2.449                               |
| <i>F</i> (000)                                            | 396                                 |
| Θ range [°]                                               | 3.16 – 25.24                        |
| Index ranges                                              | -11 ≤ <i>h</i> ≤ 11                 |
|                                                           | -11 ≤ <i>k</i> ≤ 11                 |
|                                                           | -11 ≤ <i>l</i> ≤ 11                 |
| Reflns. collected                                         | 10790                               |
| Reflns. obsd.                                             | 2610                                |
| Reflns. unique                                            | 2820                                |
|                                                           | ( <i>R</i> <sub>int</sub> = 0.0320) |
| <i>R</i> <sub>1</sub> , <i>wR</i> <sub>2</sub> (2σ data)  | 0.0220, 0.0535                      |
| <i>R</i> <sub>1</sub> , <i>wR</i> <sub>2</sub> (all data) | 0.0246, 0.0551                      |
| GOOF on <i>F</i> <sup>2</sup>                             | 1.048                               |
| Peak/hole [e Å <sup>-3</sup> ]                            | 1.195 / -0.377                      |

---

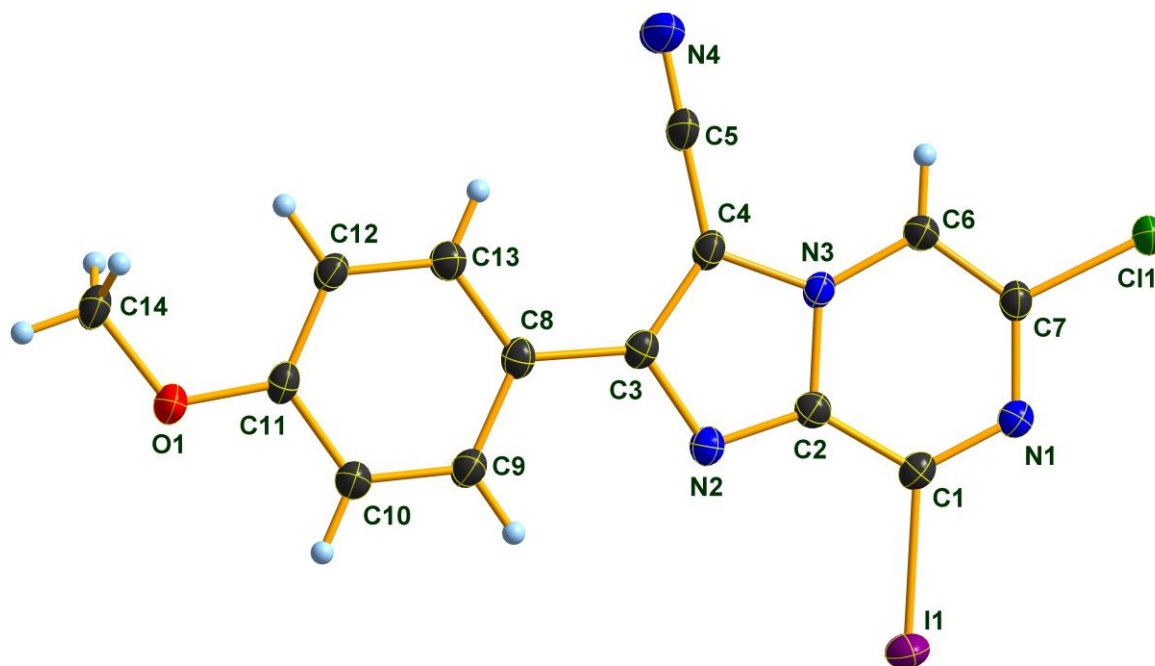

**Figure 1.** Molecular structure of compound **18a** in the crystal. DIAMOND<sup>13</sup> representation; thermal ellipsoids are drawn at 50 % probability level.

**Table 2.** Selected bond lengths (Å) of compound **18a**.

|          |          |           |          |
|----------|----------|-----------|----------|
| I1 – C1  | 2.079(2) | C5 – N4   | 1.140(3) |
| Cl1 – C7 | 1.727(2) | C5 – C4   | 1.424(3) |
| O1 – C11 | 1.356(3) | C6 – C7   | 1.360(3) |
| O1 – C14 | 1.430(3) | C8 – C13  | 1.396(3) |
| N1 – C1  | 1.304(3) | C10 – C11 | 1.398(3) |
| N1 – C7  | 1.357(3) | C11 – C12 | 1.391(3) |
| C1 – C2  | 1.418(3) | C13 – C12 | 1.390(3) |
| N2 – C2  | 1.323(3) | N3 – C6   | 1.371(3) |
| N2 – C3  | 1.356(3) | N3 – C4   | 1.379(3) |
| C2 – N3  | 1.384(3) | C9 – C10  | 1.376(3) |
| C3 – C4  | 1.402(3) | C9 – C8   | 1.401(3) |
| C3 – C8  | 1.464(3) |           |          |

**Table 3.** Selected bond angles (°) of compound **18a**.

|                |          |                |          |
|----------------|----------|----------------|----------|
| C11 – O1 – C14 | 118.2(2) | N1 – C7 – C6   | 125.1(2) |
| C1 – N1 – C7   | 117.4(2) | N1 – C7 – Cl1  | 116.0(2) |
| N1 – C1 – C2   | 123.1(2) | C6 – C7 – Cl1  | 118.9(2) |
| N1 – C1 – I1   | 120.4(2) | C13 – C8 – C9  | 118.4(2) |
| C2 – C1 – I1   | 116.5(2) | C13 – C8 – C3  | 122.8(2) |
| C2 – N2 – C3   | 106.4(2) | C9 – C8 – C3   | 118.8(2) |
| N2 – C2 – N3   | 111.7(2) | C9 – C10 – C11 | 120.3(2) |
| N2 – C2 – C1   | 132.0(2) | O1 – C11 – C12 | 124.5(2) |

|               |          |                 |          |
|---------------|----------|-----------------|----------|
| N3 – C2 – C1  | 116.3(2) | O1 – C11 – C10  | 115.7(2) |
| N2 – C3 – C4  | 109.9(2) | C12 – C11 – C10 | 119.8(2) |
| N2 – C3 – C8  | 120.9(2) | C12 – C13 – C8  | 121.3(2) |
| C4 – C3 – C8  | 129.2(2) | C13 – C12 – C11 | 119.5(2) |
| C6 – N3 – C4  | 131.9(2) | N3 – C4 – C3    | 105.8(2) |
| C6 – N3 – C2  | 121.9(2) | N3 – C4 – C5    | 120.9(2) |
| C4 – N3 – C2  | 106.2(2) | C3 – C4 – C5    | 133.2(2) |
| C10 – C9 – C8 | 120.8(2) | C7 – C6 – N3    | 116.2(2) |
| N4 – C5 – C4  | 178.7(3) |                 |          |

**Table 4.** Selected torsion angles (°) of compound **18a**.

|                   |           |                       |           |
|-------------------|-----------|-----------------------|-----------|
| C7 – N1 – C1 – C2 | -1.2(3)   | C4 – N3 – C6 – C7     | 178.5(2)  |
| C7 – N1 – C1 – I1 | 179.2(2)  | C2 – N3 – C6 – C7     | 0.3(3)    |
| C3 – N2 – C2 – N3 | -0.3(3)   | C1 – N1 – C7 – C6     | -0.8(4)   |
| C3 – N2 – C2 – C1 | 179.9(2)  | C1 – N1 – C7 – C11    | 179.3(2)  |
| N1 – C1 – C2 – N2 | -177.6(2) | N3 – C6 – C7 – N1     | 1.2(4)    |
| I1 – C1 – C2 – N2 | 2.0(3)    | N3 – C6 – C7 – C11    | -178.9(2) |
| N1 – C1 – C2 – N3 | 2.5(3)    | C10 – C9 – C8 – C13   | 0.8(4)    |
| I1 – C1 – C2 – N3 | -177.8(2) | C10 – C9 – C8 – C3    | -179.8(2) |
| C2 – N2 – C3 – C4 | 0.9(3)    | N2 – C3 – C8 – C13    | 178.6(2)  |
| C2 – N2 – C3 – C8 | -179.8(2) | C4 – C3 – C8 – C13    | -2.2(4)   |
| N2 – C2 – N3 – C6 | 178.1(2)  | N2 – C3 – C8 – C9     | -0.7(3)   |
| C1 – C2 – N3 – C6 | -2.1(3)   | C4 – C3 – C8 – C9     | 178.4(2)  |
| N2 – C2 – N3 – C4 | -0.5(3)   | C8 – C9 – C10 – C11   | -0.1(4)   |
| C1 – C2 – N3 – C4 | 179.4(2)  | C14 – O1 – C11 – C12  | -0.9(3)   |
| C6 – N3 – C4 – C3 | -177.4(2) | C14 – O1 – C11 – C10  | -179.9(2) |
| C2 – N3 – C4 – C3 | 1.0(2)    | C9 – C10 – C11 – O1   | 178.4(2)  |
| C6 – N3 – C4 – C5 | 5.6(4)    | C9 – C10 – C11 – C12  | -0.6(4)   |
| C2 – N3 – C4 – C5 | -176.0(2) | C9 – C8 – C13 – C12   | -0.9(4)   |
| N2 – C3 – C4 – N3 | -1.2(3)   | C3 – C8 – C13 – C12   | 179.7(2)  |
| C8 – C3 – C4 – N3 | 179.6(2)  | C8 – C13 – C12 – C11  | 0.3(4)    |
| N2 – C3 – C4 – C5 | 175.3(3)  | O1 – C11 – C12 – C13  | -178.4(2) |
| C8 – C3 – C4 – C5 | -3.9(4)   | C10 – C11 – C12 – C13 | 0.5(4)    |

# Theoretical Studies

## Computational details

As in earlier related studies,<sup>12</sup> we employ calculations at the CPCM(DMSO)/B3LYP-D3/6-311++G(2df,2p)//B3LYP-D3/6-31++G(2d,p) level of theory for the prediction of  $pK_a$  values of heterocyclic systems. Frequency calculations have been carried out to verify that the optimized structures are true minima. Thermochemical corrections to  $H^{gas}$  and  $G^{gas}$  at 298.15 K were calculated with GoodVibes using the quasi-harmonic approximation.<sup>13</sup> The furan/furan-2-ide reference system was used, whose  $pK_a$  value amounts to +35.0 in DMSO.<sup>14</sup> Pyrimidine was chosen as the protonated reference compound (positively charged) with a  $pK_a$  value of  $+0.55 \pm 0.15$  in DMSO.<sup>15</sup>

## Relative $pK_a$ calculations

The thermodynamic cycles, illustrated in **Figure TF0.1** and in **Figure TF0.2**, utilize an isodesmic (proton exchange) reaction that involves the transfer of a proton between an acid and a reference compound. In line with this strategy, we use equations 1 and 2 to calculate the relative  $pK_a$  values. This method offers several advantages, including the anticipated elimination of errors arising from differences in solvation free energies of the charged species on the reactant and product sides. Additionally, this approach assumes that the investigated structure and its reference are structurally similar and have comparable  $pK_a$  values.<sup>16</sup>

---

<sup>12</sup> M. Balkenhohl, H. Jangra, I. S. Makarov, S. M. Yang, H. Zipse, P. Knochel, *Angew. Chem. Int. Ed.* **2020**, *59*, 14992-14999.

<sup>13</sup> *GoodVibes*, rev. 3.0.1., as described in: G. Luchini, J. V. Alegre-Requena, I. Funes-Ardoiz, R. S. Paton, *F1000Research* **2020**, *9*, 291.

<sup>14</sup> A. Frischmuth, M. Fernandez, N. M. Barl, F. Achrainger, H. Zipse, G. Berionni, H. Mayr, K. Karaghiosoff, P. Knochel, *Angew. Chem. Int. Ed.* **2014**, *53*, 7928-7932.

<sup>15</sup> R. L. Benoit, M. Frechette, *Thermochim. Acta* **1988**, *127*, 125-127.

<sup>16</sup> R. Casasnovas, J. Ortega-Castro, J. Frau, J. Donoso, F. Muñoz, *Int. J. Quantum Chem.* **2014**, *114*, 1350-1363.

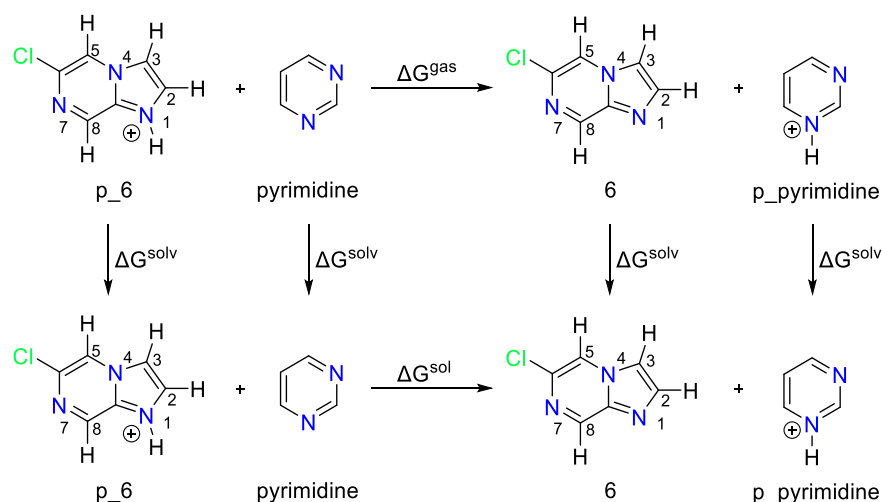

**Figure TF0.1.** Thermodynamic cycle used in the relative calculation of  $pK_a$  values for protonated (p\_) molecules. Reference compound: protonated pyrimidine (p\_pyrimidine) with a  $pK_a$  value of  $0.55 \pm 0.15$  in DMSO.

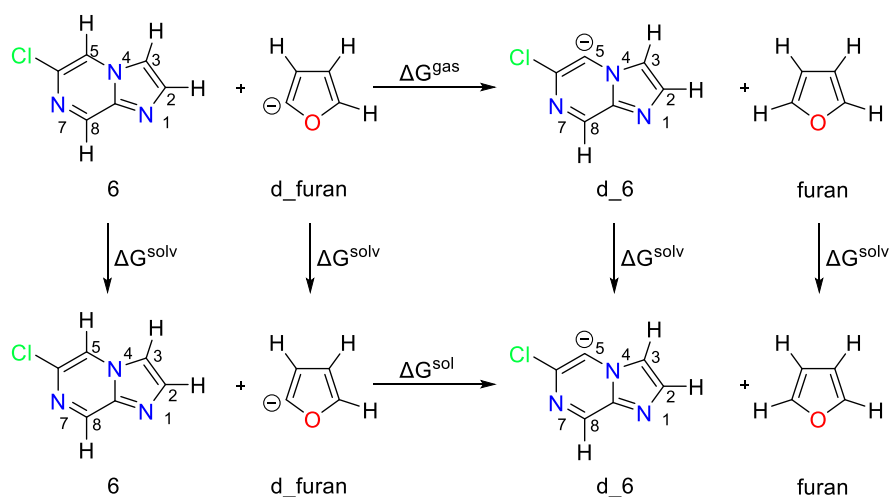

**Figure TF0.2.** Thermodynamic cycle used in the relative calculation of  $pK_a$  values for neutral molecules. Reference compound: furan with a  $pK_a$  value of 35.0 in DMSO. (“d\_” - deprotonated)

$$\Delta pK_a = \frac{\Delta G^{\text{sol}}}{2.303RT} \quad (\text{eq. 1})$$

$$pK_a(\text{studied molecule}) = pK_a(\text{Ref}) + \Delta pK_a \quad (\text{eq. 2})$$

## Computational methods

Geometry optimizations have been performed using the B3LYP hybrid functional, complemented by the D3 dispersion correction. Geometry optimizations have been performed with the 6-31++G(2d,p) basis set. Thermal corrections at 298.15 K have been calculated at the same level as the geometry optimizations with quasi-harmonic treatment in GoodVibes v3.0.1 using Grimme's entropy treatment together with Head-Gordon's enthalpy treatment (**Table TT0.1**). Single-point calculations were then performed at the CPCM(DMSO)/B3LYP-D3/6-311++G(2df,2p)/(U)B3LYP-D3/6-31++G(2d,p) level of theory. The solution phase free energies  $G^{\text{sol}}$  are computed by combining the solution phase single-point energy with thermal corrections calculated in the gas phase:

$$G^{\text{sol}} = E_{\text{tot}}^{\text{single-point in solution}} + \text{ZPE}^{\text{gas}} + \Delta G_{0\text{K}\rightarrow 298\text{K}}^{\text{gas}} + \Delta G_{0\text{K}\rightarrow 298\text{K}}^{1\text{atm}\rightarrow 1\text{M}}$$

$\Delta G_{0\text{K}\rightarrow 298\text{K}}^{1\text{atm}\rightarrow 1\text{M}} = +7.91 \text{ kJ mol}^{-1}$  is the free energy difference for converting from the standard state concentration of 1 atm to the standard state concentration of 1 mol l<sup>-1</sup>.

The initial structures of molecular complexes were generated randomly using the «kick» algorithm.<sup>17</sup> The individuality of the found conformers was confirmed using an energy criterion  $\Delta E_{\text{tot}} > 10^{-7}$  Hartree<sup>18</sup> and comparing geometries by distances between each atom and the centroid point.<sup>19</sup> All calculations have been performed with *Gaussian 09, rev. D.01*.

**Table TT0.1.** GoodVibes usage example

|                                                                                                                    |              |           |              |              |           |           |              |              |  |
|--------------------------------------------------------------------------------------------------------------------|--------------|-----------|--------------|--------------|-----------|-----------|--------------|--------------|--|
| Input                                                                                                              |              |           |              |              |           |           |              |              |  |
| python3 -m goodvibes -qh mol3.log                                                                                  |              |           |              |              |           |           |              |              |  |
| Output                                                                                                             |              |           |              |              |           |           |              |              |  |
| GoodVibes v3.0.1 2023/06/29 00:08:23                                                                               |              |           |              |              |           |           |              |              |  |
| REF: Luchini, G.; Alegre-Requena J. V.; Guan, Y.; Funes-Ardoiz, I.; Paton, R. S. (2019).                           |              |           |              |              |           |           |              |              |  |
| GoodVibes: GoodVibes 3.0.1 <a href="http://doi.org/10.5281/zenodo.595246">http://doi.org/10.5281/zenodo.595246</a> |              |           |              |              |           |           |              |              |  |
| Requested: -qh                                                                                                     |              |           |              |              |           |           |              |              |  |
| Temperature = 298.15 Kelvin Pressure = 1 atm                                                                       |              |           |              |              |           |           |              |              |  |
| All energetic values below shown in Hartree unless otherwise specified.                                            |              |           |              |              |           |           |              |              |  |
| Using vibrational scale factor 1.0 for B3LYP/6-31++G(2d,p) level of theory                                         |              |           |              |              |           |           |              |              |  |
| Entropic quasi-harmonic treatment: frequency cut-off value of 100.0 wavenumbers will be applied.                   |              |           |              |              |           |           |              |              |  |
| QS = Grimme: Using a mixture of RRHO and Free-rotor vibrational entropies.                                         |              |           |              |              |           |           |              |              |  |
| REF: Grimme, S. Chem. Eur. J. 2012, 18, 9955-9964                                                                  |              |           |              |              |           |           |              |              |  |
| Enthalpy quasi-harmonic treatment: frequency cut-off value of 100.0 wavenumbers will be applied.                   |              |           |              |              |           |           |              |              |  |
| QH = Head-Gordon: Using an RRHO treatment with an approximation term for vibrational energy.                       |              |           |              |              |           |           |              |              |  |
| REF: Li, Y.; Gomes, J.; Sharada, S. M.; Bell, A. T.; Head-Gordon, M. J. Phys. Chem. C 2015, 119, 1840-1850         |              |           |              |              |           |           |              |              |  |
| Structure                                                                                                          | E            | ZPE       | H            | qh-H         | T.S       | T.qh-S    | G(T)         | qh-G(T)      |  |
| *****                                                                                                              |              |           |              |              |           |           |              |              |  |
| o mol3                                                                                                             | -395.9217110 | 0.1059700 | -395.8089849 | -395.8090418 | 0.0368243 | 0.0368315 | -395.8458092 | -395.8458733 |  |
| *****                                                                                                              |              |           |              |              |           |           |              |              |  |

<sup>17</sup> a) D. Šakić, M. Hanževački, D. M. Smith, V. Vrček, *Org. Biomol. Chem.* 2015, 13, 11740-11752; b) D. Šakić, <https://kick.science/KICK.html>.

<sup>18</sup> V. Korotenko, <https://github.com/vnkorotenko/ess>.

<sup>19</sup> V. Korotenko, <https://github.com/vnkorotenko/ccs>.



## Computational Results

### Calculated $pK_a$ values

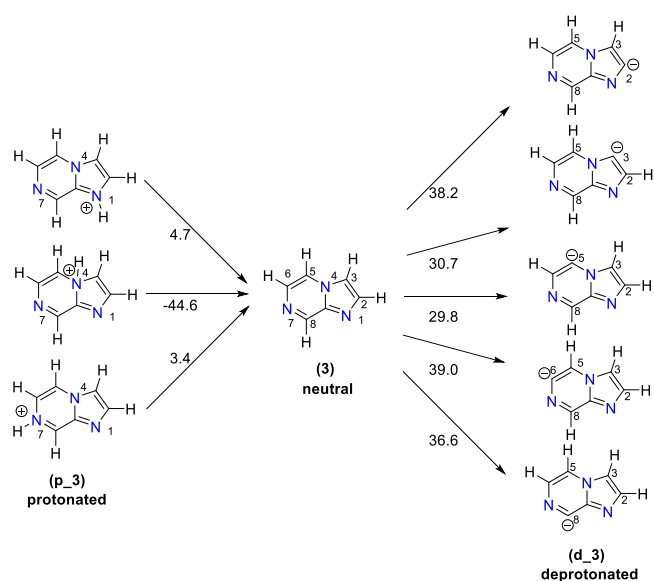

**Figure TF1.** Calculated  $pK_a$  values for system 3 (CPCM(DMSO)/B3LYP-D3/6-311++G(2df,2p)//B3LYP-D3/6-31++G(2d,p) level of theory).

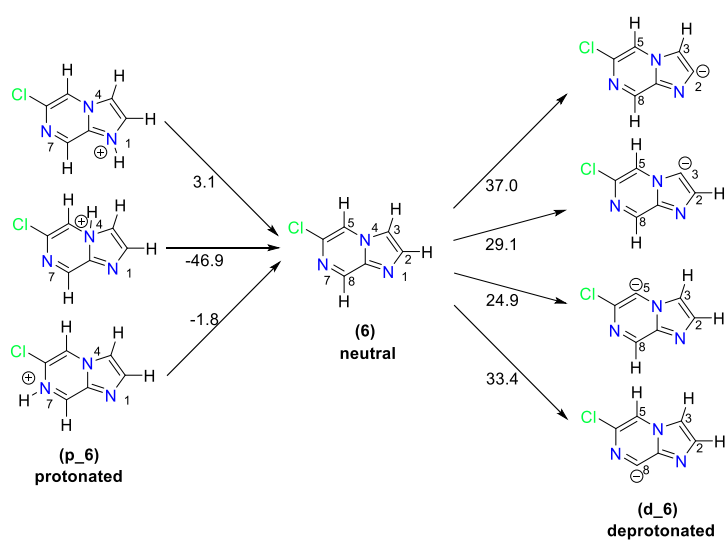

**Figure TF2.** Calculated  $pK_a$  values for system 6 (CPCM(DMSO)/B3LYP-D3/6-311++G(2df,2p)//B3LYP-D3/6-31++G(2d,p) level of theory).

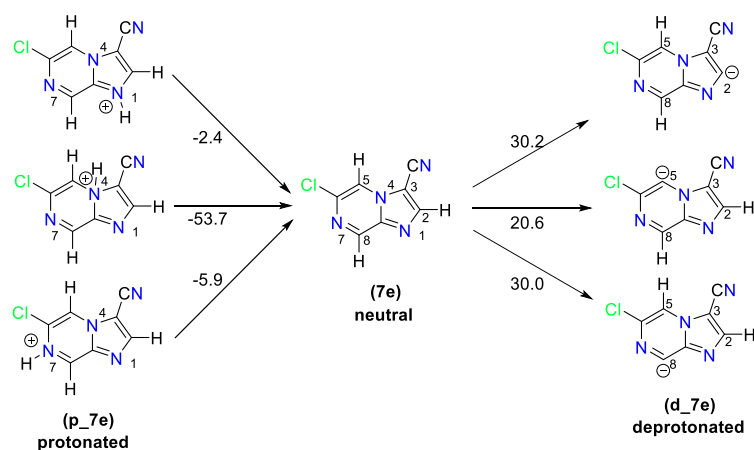

**Figure TF3.** Calculated  $pK_a$  values for system **7e** (CPCM(DMSO)/B3LYP-D3/6-311++G(2df,2p)//B3LYP-D3/6-31++G(2d,p) level of theory).

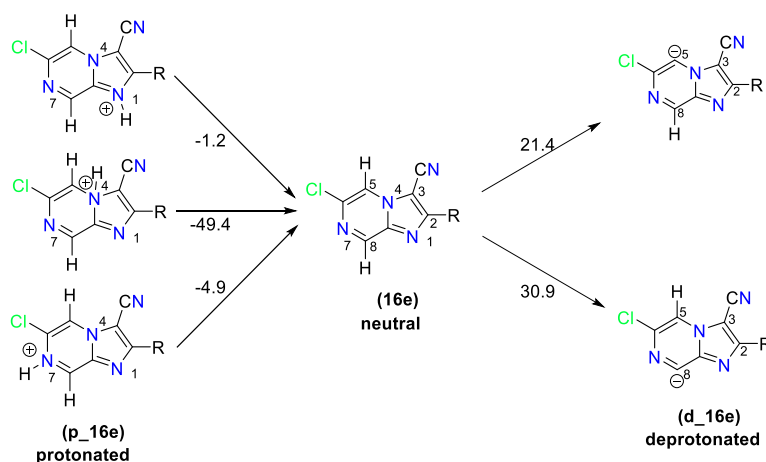

**Figure TF4.** Calculated  $pK_a$  values for system **16e** (CPCM(DMSO)/B3LYP-D3/6-311++G(2df,2p)//B3LYP-D3/6-31++G(2d,p) level of theory).

As shown in Figure TF1, the C-H bond acidity of compound **3** is largest at C5 position with  $pK_a(C5) = +29.8$ , closely followed by  $pK_a(C3) = +30.7$ . The basicity of the three nitrogen atoms is largest at N1 with  $pK_a(N1) = +4.7$ , closely followed by  $pK_a(N7) = +3.4$ . Introduction of an electron-withdrawing chlorine substituent at C6 as in compound **6** causes a general increase in C-H bond acidity and a decrease in basicity (Figure TF2). The most acidic position in compound **6** is C5 with  $pK_a(C5) = +24.9$ , all other positions being significantly less acidic. The most basic position is N1 with  $pK_a(N1) = +3.1$ , followed by  $pK_a(N7) = -1.8$ . The calculated pKa values for molecules **7e** and **16e** are presented in Figures **TF3** and **TF4**, respectively.

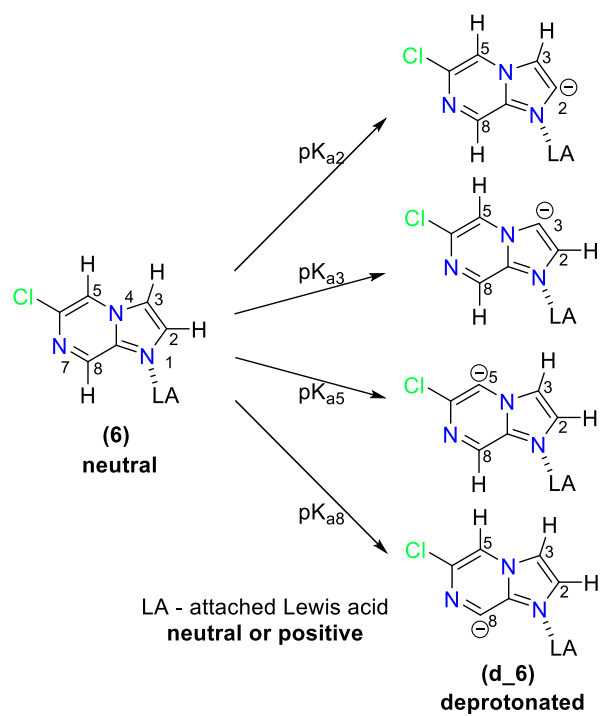

**Figure TF5.** Definitions of C-H bond  $pK_a$  values of Lewis acid complexes of **6**.

**Table TT1.**  $pK_a$  values of Lewis acid complexes of **6** calculated at the CPCM(DMSO)/B3LYP-D3/6-311++G(2df,2p)// B3LYP-D3/6-31++G(2d,p) level of theory.

| Lewis acid                                                                                         | C-H bond $pK_a$ values of <b>6</b> |           |             |           |
|----------------------------------------------------------------------------------------------------|------------------------------------|-----------|-------------|-----------|
|                                                                                                    | $pK_{a2}$                          | $pK_{a3}$ | $pK_{a5}$   | $pK_{a8}$ |
| <b>charge = 0</b>                                                                                  |                                    |           |             |           |
| -                                                                                                  | 37.0                               | 29.1      | <b>24.9</b> | 33.4      |
| LiCl                                                                                               | 31.0                               | 26.4      | <b>22.7</b> | 27.5      |
| MgCl <sub>2</sub>                                                                                  | 26.0                               | 24.4      | <b>21.3</b> | 23.0      |
| Me <sub>2</sub> NMgCl                                                                              | 30.8                               | 25.1      | <b>21.8</b> | 30.6      |
| TMPMgCl                                                                                            | 30.9                               | 25.0      | <b>21.8</b> | 31.5      |
| ZnCl <sub>2</sub>                                                                                  | 28.8                               | 24.1      | <b>21.0</b> | Zn-C      |
| Me <sub>2</sub> NZnCl                                                                              | 29.8                               | 24.4      | <b>21.2</b> | 30.0      |
| TMPZnCl                                                                                            | 31.5                               | 24.9      | <b>21.0</b> | 35.0      |
| <b>charge = +1</b>                                                                                 |                                    |           |             |           |
| MgCl <sup>+</sup>                                                                                  | 21.6                               | 22.7      | <b>20.2</b> | Mg-C      |
| ZnCl <sup>+</sup>                                                                                  | Zn-C                               | 21.0      | <b>18.7</b> | Zn-C      |
| <b>charge = +2</b>                                                                                 |                                    |           |             |           |
| Mg <sup>+2</sup>                                                                                   | 24.3                               | 21.3      | <b>18.8</b> | Mg-C      |
| Zn <sup>+2</sup>                                                                                   | Zn-C                               | 25.4      | <b>21.2</b> | Zn-C      |
| „Mg-C“ – Mg atom translation and formation of a Mg-C bond occurs during the geometry optimization; |                                    |           |             |           |
| „Zn-C“ – Zn atom translation and formation of a Zn-C bond occurs during the geometry optimization. |                                    |           |             |           |

The C-H bond acidity profile of compound **6** was subsequently explored in the absence and the presence of Lewis acids coordinated to N1 (Figure TF5). Lewis acid coordination to N1 in compound **6** leads to an increase in acidity of all C-H bonds (**Table TT1**). The C5-H is the most acidic position in **6** irrespective of the choice of Lewis acid. In the class of neutral Lewis acids, the lowest  $pK_a$  values (+21.0) have been calculated for the zinc salts ZnCl<sub>2</sub> and TMPZnCl, closely followed by those for the magnesiums(II) salts (+21.2 - +21.8). The C-H bond  $pK_a$  values are lower for cationic and dicationic Lewis acids, but this may not reflect the true bonding situation in solution experiments.

## Thermodynamic stability of the intermediate

The stability of the organometallic intermediate with a carbon-metal bond in either position 3 or 5 depends on the charge of the Lewis acid (LA) attached to the deprotonated molecule 1: position 5 is favourable at charge = 0, while position 3 at charge > 0 (**Table TT2**). If the LA has a neutral charge, the stability of the resulting deprotonated anion plays a greater role in determining the stability of the intermediate. The pKa values suggest that the 5-carboanion of molecule 1 is the most stable in this case. However, if the LA has a positive charge, electrostatic interactions become more important and it is more favourable to form a carbon-metal bond with the most negatively charged carbon. Analysis of NBO charges reveals that the C3 atom is the most negatively charged among all carbon atoms in molecule **6** and in the corresponding organometallic intermediate. Therefore, when a positively charged LA is used, position 3 becomes more stable.

**Table TT2.** The calculated relative  $\Delta G^{\text{sol}}$  values in  $\text{kJ mol}^{-1}$  for possible CH-deprotonation products with the attached Lewis acid (forming metal-carbon bond) at the CPCM(DMSO)/B3LYP-D3/6-311++G(2df,2p)//B3LYP-D3/6-31++G(2d,p) level of theory for compound **6**, **7e** and **16e**.

| Attached Lewis acid   | CH-deprotonation product of compound <b>6</b><br>+ attached Lewis acid   |            |            |            |
|-----------------------|--------------------------------------------------------------------------|------------|------------|------------|
|                       | Position 2                                                               | Position 3 | Position 5 | Position 8 |
| charge=0              | charge=-1                                                                |            |            |            |
| nothing               | 68.7                                                                     | 23.9       | <b>0.0</b> | 48.3       |
| MgCl <sub>2</sub>     | 42.9                                                                     | 7.3        | <b>0.0</b> | 32.1       |
| Me <sub>2</sub> NMgCl | 46.7                                                                     | 8.2        | <b>0.0</b> | 33.5       |
| TMPMgCl               | 48.9                                                                     | 3.6        | <b>0.0</b> | 37.3       |
| ZnCl <sub>2</sub>     | 31.6                                                                     | 1.0        | <b>0.0</b> | 23.2       |
| Me <sub>2</sub> NZnCl | 34.7                                                                     | 2.6        | <b>0.0</b> | 27.2       |
| TMPZnCl               | 40.9                                                                     | 9.4        | <b>0.0</b> | 32.9       |
| charge=+1             | charge=0                                                                 |            |            |            |
| MgCl <sup>+</sup>     | 51.0                                                                     | <b>0.0</b> | 18.3       | 30.8       |
| TMPMg <sup>+</sup>    | 31.8                                                                     | <b>0.0</b> | 10.5       | 34.8       |
| ZnCl <sup>+</sup>     | 20.2                                                                     | <b>0.0</b> | 2.6        | 16.2       |
| TMPZn <sup>+</sup>    | 28.0                                                                     | 3.8        | <b>0.0</b> | 22.5       |
| charge=+2             | charge=+1                                                                |            |            |            |
| Mg <sup>+2</sup>      | 61.7                                                                     | <b>0.0</b> | 42.6       | 38.8       |
| Zn <sup>+2</sup>      | 20.1                                                                     | <b>0.0</b> | 44.1       | 63.8       |
| Attached Lewis acid   | CH-deprotonation product of compound <b>7e</b><br>+ attached Lewis acid  |            |            |            |
|                       | Position 2                                                               | Position 3 | Position 5 | Position 8 |
| charge=0              | charge=-1                                                                |            |            |            |
| nothing               | 54.6                                                                     | NO         | <b>0.0</b> | 53.9       |
| charge=+1             | charge=0                                                                 |            |            |            |
| TMPZn <sup>+</sup>    | 11.4                                                                     | NO         | <b>0.0</b> | 13.7       |
| Attached Lewis acid   | CH-deprotonation product of compound <b>16e</b><br>+ attached Lewis acid |            |            |            |
|                       | Position 2                                                               | Position 3 | Position 5 | Position 8 |
| charge=0              | charge=-1                                                                |            |            |            |
| nothing               | NO                                                                       | NO         | <b>0.0</b> | 54.0       |
| charge=+1             | charge=0                                                                 |            |            |            |
| MgCl <sup>+</sup>     | NO                                                                       | NO         | <b>0.0</b> | 28.0       |

|                                                                                            |                                                                                     |           |                                                                                                                                                |                                                                                       |
|--------------------------------------------------------------------------------------------|-------------------------------------------------------------------------------------|-----------|------------------------------------------------------------------------------------------------------------------------------------------------|---------------------------------------------------------------------------------------|
| 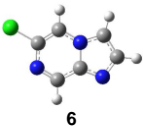<br>6     |    | Reaction1 | <br>13<br>Calculated position 3<br>Experimental position 3   |    |
| <br>6     |    | Reaction2 | <br>Calculated position 3<br>Experimental position 5         |    |
| <br>6     |    | Reaction3 | <br>Calculated position 5<br>Experimental position 5         |    |
| <br>6    |   | Reaction4 | <br>14<br>Calculated position 5<br>Experimental position 5  |   |
| <br>7e  |  | Reaction5 | <br>Calculated position 5<br>Experimental position 2       |  |
| <br>7e  |  | Reaction6 | <br>Calculated position 5<br>Experimental position 2       |  |
| <br>7e  |  | Reaction7 | <br>15<br>Calculated position 5<br>Experimental position 2 |  |
| <br>16e |  | Reaction8 | <br>17<br>Calculated position 5<br>Experiment position 8   |  |

|                                                                                                    |                                                                                     |                   |                                                                                                                                                            |                                                                                       |
|----------------------------------------------------------------------------------------------------|-------------------------------------------------------------------------------------|-------------------|------------------------------------------------------------------------------------------------------------------------------------------------------------|---------------------------------------------------------------------------------------|
| 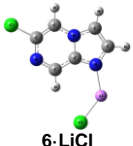 <p>6-LiCl</p>    |    | <p>Reaction11</p> |  <p>13-LiCl<br/>Calculated position 8<br/>Experimental position 3</p>    |    |
|  <p>6-LiCl</p>    |    | <p>Reaction12</p> |  <p>Calculated position 8<br/>Experimental position 5</p>                |    |
|  <p>6-LiCl</p>    |    | <p>Reaction13</p> |  <p>Calculated position 5<br/>Experimental position 5</p>                |    |
|  <p>6-LiCl</p>   |  | <p>Reaction14</p> |  <p>14-2LiCl<br/>Calculated position 3<br/>Experimental position 5</p> |   |
|  <p>7e-LiCl</p> |  | <p>Reaction15</p> |  <p>Calculated position 2<br/>Experimental position 2</p>              |  |
|  <p>7e-LiCl</p> |  | <p>Reaction16</p> |  <p>Calculated position 5<br/>Experimental position 2</p>              |  |
|  <p>7e-LiCl</p> |  | <p>Reaction17</p> |  <p>15-2LiCl<br/>Calculated position 2<br/>Experimental position 2</p> |  |

|                                                                                                    |                                                                                     |                   |                                                                                                                                                            |                                                                                       |
|----------------------------------------------------------------------------------------------------|-------------------------------------------------------------------------------------|-------------------|------------------------------------------------------------------------------------------------------------------------------------------------------------|---------------------------------------------------------------------------------------|
| 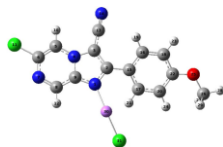 <p>16e-LiCl</p>  |    | <p>Reaction18</p> |  <p>17-LiCl<br/>Calculated position 8<br/>Experimental position 8</p>    |    |
|  <p>6-LiCl</p>    |    | <p>Reaction21</p> |  <p>13-LiCl<br/>Calculated position 5<br/>Experimental position 3</p>    |    |
|  <p>6-LiCl</p>    |    | <p>Reaction22</p> |  <p>Calculated position 8<br/>Experimental position 5</p>                |    |
|  <p>6-LiCl</p>   |   | <p>Reaction23</p> |  <p>Calculated position 3<br/>Experimental position 5</p>               |   |
|  <p>6-LiCl</p>  |  | <p>Reaction24</p> |  <p>14-2LiCl<br/>Calculated position 8<br/>Experimental position 5</p> |  |
|  <p>7e-LiCl</p> |  | <p>Reaction25</p> |  <p>Calculated position 2<br/>Experimental position 2</p>              |  |
|  <p>7e-LiCl</p> |  | <p>Reaction26</p> |  <p>Calculated position 5<br/>Experimental position 2</p>              |  |



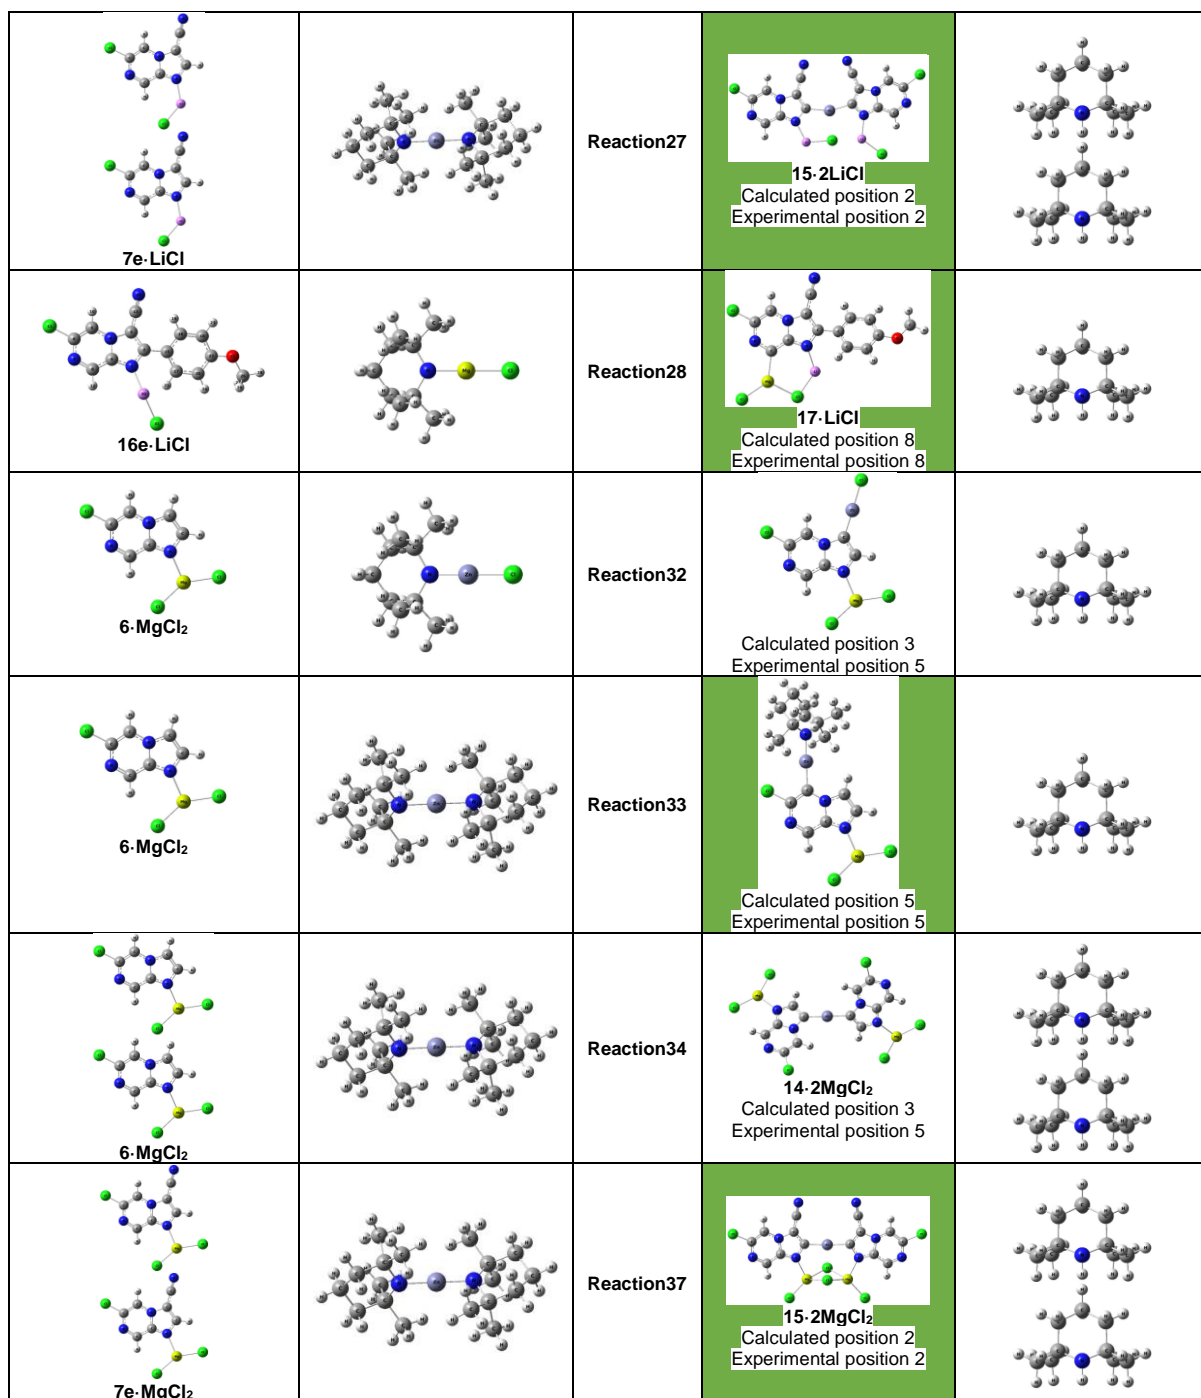

**Figure TF6.** The calculated reactions of proton/Mg<sup>+2</sup> and proton/Zn<sup>+2</sup> transfer. The most stable conformers/ intermediates by  $\Delta G^{\text{sol}}$  (**DMSO**) are shown at the CPCM(**DMSO**)/B3LYP-D3/6-311++G(2df,2p)//B3LYP-D3/6-31++G(2d,p) level of theory. **Green color** indicates the most thermodynamically stable (calculated) intermediate coinciding with the experimental intermediate.

**Table TT3.** The calculated  $\Delta G^{\text{sol}}$  values for reactions 1-8, 11-18, 21-28, 32-34 and 37 with different intermediate (in positions 2,3,5,8). Thermal corrections for **scheme 2**, **scheme 3**, **scheme 5** and **scheme 6** in manuscript at 298.15 K.

| Scheme in manuscript | Reaction | CPCM(DMSO)/B3LYP-D3/6-311++G(2df,2p)//B3LYP-D3/6-31++G(2d,p)<br>$\Delta G^{\text{sol}}$ |               |               |               | CPCM(THF)/B3LYP-D3/6-311++G(2df,2p)//B3LYP-D3/6-31++G(2d,p)<br>$\Delta G^{\text{sol}}$ |              |               |               |
|----------------------|----------|-----------------------------------------------------------------------------------------|---------------|---------------|---------------|----------------------------------------------------------------------------------------|--------------|---------------|---------------|
|                      |          | Intermediate (298.15 K, DMSO)                                                           |               |               |               | Intermediate (298.15 K, THF)                                                           |              |               |               |
|                      |          | 2                                                                                       | 3             | 5             | 8             | 2                                                                                      | 3            | 5             | 8             |
| <b>Scheme 2</b>      | 1        | 39.6                                                                                    | <b>-11.4*</b> | 6.9           | 19.4          | 39.4                                                                                   | <b>-2.0*</b> | 9.8           | 19.7          |
| <b>Scheme 3</b>      | 2        | -2.2                                                                                    | <b>-22.4</b>  | -19.8*        | -6.2          | 1.8                                                                                    | <b>-16.2</b> | -14.0*        | -2.9          |
|                      | 3        | 10.7                                                                                    | -13.5         | <b>-17.4*</b> | 5.2           | 12.2                                                                                   | -10.3        | <b>-14.1*</b> | 6.0           |
|                      | 4        | 8.8                                                                                     | -33.7         | <b>-35.7*</b> | 0.2           | 14.0                                                                                   | -23.8        | <b>-27.3*</b> | 4.6           |
| <b>Scheme 5</b>      | 5        | -13.0*                                                                                  | -             | <b>-17.9</b>  | -10.9         | -7.7*                                                                                  | -            | <b>-14.1</b>  | -6.2          |
|                      | 6        | -3.6*                                                                                   | -             | <b>-15.0</b>  | -1.3          | -1.4*                                                                                  | -            | <b>-13.7</b>  | 0.3           |
|                      | 7        | -16.7*                                                                                  | -             | <b>-31.6</b>  | -11.5         | -8.6*                                                                                  | -            | <b>-29.2</b>  | -5.1          |
| <b>Scheme 6</b>      | 8        | -                                                                                       | -             | <b>-9.3</b>   | 18.7*         | -                                                                                      | -            | <b>-9.1</b>   | 19.8*         |
| Scheme in manuscript | Reaction | Intermediate + LiCl in position 1 (298.15 K, DMSO)                                      |               |               |               | Intermediate + LiCl in position 1 (298.15 K, THF)                                      |              |               |               |
|                      |          | 2                                                                                       | 3             | 5             | 8             | 2                                                                                      | 3            | 5             | 8             |
|                      |          | <b>Scheme 2</b>                                                                         | 11            | 7.9           | -17.6*        | 4.9                                                                                    | <b>-40.8</b> | 16.7          | -7.5*         |
| <b>Scheme 3</b>      | 12       | -27.7                                                                                   | -25.3         | -1.9*         | <b>-28.3</b>  | <b>-31.2</b>                                                                           | -18.4        | 1.3*          | -30.4         |
|                      | 13       | -2.2                                                                                    | -14.3         | <b>-17.3*</b> | 6.4           | -6.7                                                                                   | -11.5        | <b>-14.4*</b> | 2.2           |
|                      | 14       | -33.7                                                                                   | <b>-39.3</b>  | -34.6*        | -30.1         | <b>-47.2</b>                                                                           | -27.1        | -26.2*        | -45.6         |
| <b>Scheme 5</b>      | 15       | <b>-43.7*</b>                                                                           | -             | -19.4         | -33.7         | <b>-44.8*</b>                                                                          | -            | -15.2         | -35.1         |
|                      | 16       | -12.3*                                                                                  | -             | <b>-17.1</b>  | 6.1           | -15.6*                                                                                 | -            | <b>-15.9</b>  | 2.5           |
|                      | 17       | <b>-64.9*</b>                                                                           | -             | -33.7         | -62.9         | -68.1*                                                                                 | -            | -31.0         | <b>-76.7</b>  |
| <b>Scheme 6</b>      | 18       | -                                                                                       | -             | -14.2         | <b>-54.4*</b> | -                                                                                      | -            | -12.9         | <b>-57.3*</b> |
| Scheme in manuscript | Reaction | Intermediate + LiCl in the best position (298.15 K, DMSO)                               |               |               |               | Intermediate + LiCl in the best position (298.15 K, THF)                               |              |               |               |
|                      |          | 2                                                                                       | 3             | 5             | 8             | 2                                                                                      | 3            | 5             | 8             |
|                      |          | <b>Scheme 2</b>                                                                         | 21            | 7.3           | -40.6*        | <b>-45.1</b>                                                                           | -41.4        | 4.3           | -42.0*        |
| <b>Scheme 3</b>      | 22       | -28.3                                                                                   | -28.2         | -29.3*        | <b>-30.5</b>  | -31.8                                                                                  | -29.8        | -30.2*        | <b>-32.6</b>  |
|                      | 23       | -2.8                                                                                    | <b>-20.9</b>  | -20.7*        | 3.4           | -7.2                                                                                   | <b>-24.3</b> | -23.6*        | -1.1          |
|                      | 24       | -34.9                                                                                   | -40.5         | -35.8*        | <b>-51.6</b>  | -48.3                                                                                  | -28.1        | -27.2*        | <b>-62.8</b>  |
| <b>Scheme 5</b>      | 25       | <b>-43.7*</b>                                                                           | -             | -22.4         | -33.7         | <b>-44.8*</b>                                                                          | -            | -31.8         | -35.1         |
|                      | 26       | -12.3*                                                                                  | -             | <b>-17.1</b>  | 6.1           | -15.6*                                                                                 | -            | <b>-15.9</b>  | 2.5           |
|                      | 27       | <b>-64.9*</b>                                                                           | -             | -33.7         | -62.9         | -68.1*                                                                                 | -            | -31.0         | <b>-76.7</b>  |
| <b>Scheme 6</b>      | 28       | -                                                                                       | -             | -51.5         | <b>-54.4*</b> | -                                                                                      | -            | <b>-61.5</b>  | -57.3*        |
| Scheme in manuscript | Reaction | Intermediate + MgCl <sub>2</sub> in the best position (298.15 K, DMSO)                  |               |               |               | Intermediate + MgCl <sub>2</sub> in the best position (298.15 K, THF)                  |              |               |               |
|                      |          | 2                                                                                       | 3             | 5             | 8             | 2                                                                                      | 3            | 5             | 8             |
|                      |          | <b>Scheme 3</b>                                                                         | 32            | -14.6         | <b>-26.5</b>  | -20.9*                                                                                 | -10.7        | -15.5         | <b>-19.6</b>  |
| 33                   | -0.2     |                                                                                         | -18.2         | <b>-19.6*</b> | 13.3          | -2.1                                                                                   | -15.2        | <b>-16.6*</b> | 11.2          |
| 34                   | -42.1    |                                                                                         | <b>-45.0</b>  | -38.9*        | 11.0          | <b>-49.9</b>                                                                           | -32.3        | -28.9*        | -2.7          |
| <b>Scheme 5</b>      | 37       | <b>-69.3*</b>                                                                           | -             | -34.6         | 4.5           | <b>-76.5*</b>                                                                          | -            | -32.0         | -8.8          |

\* - the asterisk indicates the position observed in the experiment. **Bold** indicates the most thermodynamically stable (calculated) intermediate. **Green color** marks the most thermodynamically stable (calculated) intermediate coinciding with the experimental intermediate.

**Table TT4.** The calculated  $\Delta G^{\text{sol}}$  values for reactions 1-8, 11-18, 21-28, 32-34 and 37 with different intermediate (in positions 2,3,5,8). Thermal corrections for scheme 2 are at 213.15 K, for scheme 3 and scheme 5 at 253.15 K, scheme 6 at 233.15 K.

| Scheme in manuscript | Reaction | CPCM(DMSO)/B3LYP-D3/6-311++G(2df,2p)//B3LYP-D3/6-31++G(2d,p)<br>$\Delta G^{\text{sol}}$ |               |               |               | CPCM(THF)/B3LYP-D3/6-311++G(2df,2p)//B3LYP-D3/6-31++G(2d,p)<br>$\Delta G^{\text{sol}}$ |              |               |               |
|----------------------|----------|-----------------------------------------------------------------------------------------|---------------|---------------|---------------|----------------------------------------------------------------------------------------|--------------|---------------|---------------|
|                      |          | Intermediate ( $T_{\text{exp.}}$ , DMSO)                                                |               |               |               | Intermediate ( $T_{\text{exp.}}$ , THF)                                                |              |               |               |
|                      |          | 2                                                                                       | 3             | 5             | 8             | 2                                                                                      | 3            | 5             | 8             |
| <b>Scheme 2</b>      | 1        | 39.6                                                                                    | <b>-10.9*</b> | 7.1           | 19.3          | 39.4                                                                                   | <b>-1.5*</b> | 10.0          | 19.6          |
| <b>Scheme 3</b>      | 2        | -2.2                                                                                    | <b>-22.4</b>  | -19.7*        | -6.1          | 1.8                                                                                    | <b>-16.2</b> | -14.0*        | -2.8          |
|                      | 3        | 11.0                                                                                    | -13.4         | <b>-17.0*</b> | 5.5           | 12.5                                                                                   | -10.2        | <b>-13.3*</b> | 6.3           |
|                      | 4        | 9.7                                                                                     | -33.0         | <b>-35.0*</b> | 1.0           | 14.9                                                                                   | -23.1        | <b>-26.7*</b> | 5.5           |
| <b>Scheme 5</b>      | 5        | -13.1*                                                                                  | -             | <b>-18.0</b>  | -10.9         | -7.7*                                                                                  | -            | <b>-14.3</b>  | -6.2          |
|                      | 6        | -3.5*                                                                                   | -             | <b>-15.1</b>  | -1.1          | -1.3*                                                                                  | -            | <b>-13.8</b>  | 0.5           |
|                      | 7        | -16.2*                                                                                  | -             | <b>-31.7</b>  | -10.9         | -8.1*                                                                                  | -            | <b>-29.2</b>  | -4.4          |
| <b>Scheme 6</b>      | 8        | -                                                                                       | -             | <b>-10.3</b>  | 18.2*         | -                                                                                      | -            | <b>-10.0</b>  | 19.3*         |
| Scheme in manuscript | Reaction | Intermediate + LiCl in position 1 ( $T_{\text{exp.}}$ , DMSO)                           |               |               |               | Intermediate + LiCl in position 1 ( $T_{\text{exp.}}$ , THF)                           |              |               |               |
|                      |          | 2                                                                                       | 3             | 5             | 8             | 2                                                                                      | 3            | 5             | 8             |
|                      |          | <b>Scheme 2</b>                                                                         | 11            | 8.4           | -17.3*        | 4.8                                                                                    | <b>-41.5</b> | 17.2          | -7.2*         |
| <b>Scheme 3</b>      | 12       | -28.1                                                                                   | -25.4         | -2.0*         | <b>-28.6</b>  | <b>-31.7</b>                                                                           | -18.4        | 1.2*          | -30.8         |
|                      | 13       | -2.5                                                                                    | -14.3         | <b>-17.4*</b> | 5.9           | -7.0                                                                                   | -11.5        | <b>-14.5*</b> | 1.7           |
|                      | 14       | -34.7                                                                                   | <b>-39.1</b>  | -34.4*        | -31.2         | <b>-48.2</b>                                                                           | -26.8        | -26.0*        | -46.7         |
| <b>Scheme 5</b>      | 15       | <b>-44.2*</b>                                                                           | -             | -19.6         | -34.2         | <b>-45.3*</b>                                                                          | -            | -15.4         | -35.6         |
|                      | 16       | -12.5*                                                                                  | -             | <b>-17.4</b>  | 5.8           | -15.8*                                                                                 | -            | <b>-16.2</b>  | 2.3           |
|                      | 17       | <b>-65.5*</b>                                                                           | -             | -34.0         | -64.1         | -69.3*                                                                                 | -            | -31.3         | <b>-77.9</b>  |
| <b>Scheme 6</b>      | 18       | -                                                                                       | -             | -14.8         | <b>-55.1*</b> | -                                                                                      | -            | -13.5         | <b>-58.1*</b> |
| Scheme in manuscript | Reaction | Intermediate + LiCl in the best position ( $T_{\text{exp.}}$ , DMSO)                    |               |               |               | Intermediate + LiCl in the best position ( $T_{\text{exp.}}$ , THF)                    |              |               |               |
|                      |          | 2                                                                                       | 3             | 5             | 8             | 2                                                                                      | 3            | 5             | 8             |
|                      |          | <b>Scheme 2</b>                                                                         | 21            | 7.8           | -41.0*        | <b>-45.2</b>                                                                           | -42.1        | 3.7           | -42.4*        |
| <b>Scheme 3</b>      | 22       | -28.8                                                                                   | -28.5         | -29.2*        | <b>-30.9</b>  | -32.2                                                                                  | -30.1        | -30.1*        | <b>-33.0</b>  |
|                      | 23       | -3.1                                                                                    | <b>-21.4</b>  | -21.3*        | 3.1           | -7.5                                                                                   | <b>-24.8</b> | -24.2*        | -1.4          |
|                      | 24       | -35.9                                                                                   | -40.3         | -35.6*        | <b>-52.9</b>  | -49.3                                                                                  | -27.9        | -27.1*        | <b>-64.6</b>  |
| <b>Scheme 5</b>      | 25       | <b>-44.2*</b>                                                                           | -             | -23.5         | -34.2         | <b>-45.3*</b>                                                                          | -            | -32.9         | -35.6         |
|                      | 26       | -12.5*                                                                                  | -             | <b>-17.4</b>  | 5.8           | -15.8*                                                                                 | -            | <b>-16.2</b>  | 2.3           |
|                      | 27       | <b>-65.5*</b>                                                                           | -             | -34.0         | -64.1         | -69.3*                                                                                 | -            | -31.3         | <b>-77.9</b>  |
| <b>Scheme 6</b>      | 28       | -                                                                                       | -             | -52.9         | <b>-62.3*</b> | -                                                                                      | -            | -63.0         | <b>-65.1*</b> |
| Scheme in manuscript | Reaction | Intermediate + MgCl <sub>2</sub> in the best position ( $T_{\text{exp.}}$ , DMSO)       |               |               |               | Intermediate + MgCl <sub>2</sub> in the best position ( $T_{\text{exp.}}$ , THF)       |              |               |               |
|                      |          | 2                                                                                       | 3             | 5             | 8             | 2                                                                                      | 3            | 5             | 8             |
|                      |          | <b>Scheme 3</b>                                                                         | 32            | -15.0         | <b>-26.7</b>  | -21.0*                                                                                 | -11.0        | -15.9         | <b>-19.7</b>  |
| <b>Scheme 3</b>      | 33       | -0.6                                                                                    | -18.4         | <b>-19.5*</b> | 13.1          | -2.5                                                                                   | -15.4        | <b>-16.5*</b> | 11.0          |
|                      | 34       | -43.3                                                                                   | <b>-45.0</b>  | -39.0*        | 9.6           | <b>-51.1</b>                                                                           | -32.3        | -28.9*        | -4.2          |
| <b>Scheme 5</b>      | 37       | <b>-70.7*</b>                                                                           | -             | -35.1         | 2.9           | <b>-77.8*</b>                                                                          | -            | -32.4         | -10.4         |

\* - the asterisk indicates the position observed in the experiment. **Bold** indicates the most thermodynamically stable (calculated) intermediate. **Green color** marks the most thermodynamically stable (calculated) intermediate coinciding with the experimental intermediate.

**Table TT5.** The estimated error values for the calculated  $\Delta G^{\text{sol}}$  values in **Table TT3** and **Table TT4**. The expected free energy difference between the experimental observed intermediate relative to the second by stability intermediate based on concentration relation 95/5: -5.2 kJ/mol at 213.15 K, -5.7 kJ/mol at 233.15 K, -6.2 kJ/mol at 253.15 K, -7.3 kJ/mol at 298.15 K, 8.31446 J·K<sup>-1</sup>·mol<sup>-1</sup>.

| Scheme in manuscript | Reaction       | CPCM/B3LYP-D3/6-311++G(2df,2p)//<br>B3LYP-D3/6-31++G(2d,p)<br>$\Delta G^{\text{sol}}$ |                    |                               |                              |
|----------------------|----------------|---------------------------------------------------------------------------------------|--------------------|-------------------------------|------------------------------|
|                      |                | Intermediate                                                                          |                    |                               |                              |
|                      |                | (298.15 K,<br>DMSO)                                                                   | (298.15 K,<br>THF) | (T <sub>exp.</sub> ,<br>DMSO) | (T <sub>exp.</sub> ,<br>THF) |
| <b>Scheme 2</b>      | 1              |                                                                                       |                    |                               |                              |
| <b>Scheme 3</b>      | 2              | 8.8                                                                                   | 8.4                | 8.9                           | 8.4                          |
|                      | 3              |                                                                                       |                    |                               |                              |
|                      | 4              |                                                                                       |                    |                               |                              |
| <b>Scheme 5</b>      | 5              | 11.1                                                                                  | 12.6               | 11.1                          | 12.8                         |
|                      | 6              | 17.6                                                                                  | 18.5               | 17.8                          | 18.7                         |
|                      | 7              | 21.1                                                                                  | 26.8               | 21.7                          | 27.3                         |
| <b>Scheme 6</b>      | 8              | 33.7                                                                                  | 34.6               | 34.2                          | 35.0                         |
|                      | <b>AVERAGE</b> | <b>18.5</b>                                                                           | <b>20.2</b>        | <b>18.7</b>                   | <b>20.4</b>                  |
| Scheme in manuscript | Reaction       | Intermediate + LiCl in position 1                                                     |                    |                               |                              |
|                      |                | (298.15 K,<br>DMSO)                                                                   | (298.15 K,<br>THF) | (T <sub>exp.</sub> ,<br>DMSO) | (T <sub>exp.</sub> ,<br>THF) |
|                      |                |                                                                                       |                    |                               |                              |
| <b>Scheme 2</b>      | 11             | 28.4                                                                                  | 42.9               | 29.4                          | 43.8                         |
| <b>Scheme 3</b>      | 12             | 32.6                                                                                  | 38.7               | 32.8                          | 39.1                         |
|                      | 13             |                                                                                       |                    |                               |                              |
|                      | 14             | 10.9                                                                                  | 27.2               | 10.9                          | 28.4                         |
| <b>Scheme 5</b>      | 15             |                                                                                       |                    |                               |                              |
|                      | 16             | 11.0                                                                                  | 6.5                | 11.1                          | 6.6                          |
|                      | 17             |                                                                                       | 14.8               |                               | 14.8                         |
| <b>Scheme 6</b>      | 18             |                                                                                       |                    |                               |                              |
|                      | <b>AVERAGE</b> | <b>20.7</b>                                                                           | <b>26.0</b>        | <b>21.1</b>                   | <b>26.5</b>                  |
| Scheme in manuscript | Reaction       | Intermediate + LiCl in the best position                                              |                    |                               |                              |
|                      |                | (298.15 K,<br>DMSO)                                                                   | (298.15 K,<br>THF) | (T <sub>exp.</sub> ,<br>DMSO) | (T <sub>exp.</sub> ,<br>THF) |
|                      |                |                                                                                       |                    |                               |                              |
| <b>Scheme 2</b>      | 21             | 9.7                                                                                   | 10.1               | 9.4                           | 9.8                          |
| <b>Scheme 3</b>      | 22             | 7.4                                                                                   | 8.6                | 7.9                           | 9.1                          |
|                      | 23             | 6.4                                                                                   | 6.9                | 6.3                           | 6.8                          |
|                      | 24             | 22.0                                                                                  | 41.8               | 23.5                          | 43.7                         |
| <b>Scheme 5</b>      | 25             |                                                                                       |                    |                               |                              |
|                      | 26             | 11.0                                                                                  | 6.5                | 11.1                          | 6.6                          |
|                      | 27             |                                                                                       | 14.8               |                               | 14.8                         |
| <b>Scheme 6</b>      | 28             |                                                                                       | 9.9                |                               | 5.7                          |
|                      | <b>AVERAGE</b> | <b>11.3</b>                                                                           | <b>14.1</b>        | <b>11.6</b>                   | <b>13.8</b>                  |
| Scheme in manuscript | Reaction       | Intermediate + MgCl <sub>2</sub> in the best position                                 |                    |                               |                              |
|                      |                | (298.15 K,<br>DMSO)                                                                   | (298.15 K,<br>THF) | (T <sub>exp.</sub> ,<br>DMSO) | (T <sub>exp.</sub> ,<br>THF) |
|                      |                |                                                                                       |                    |                               |                              |
| <b>Scheme 3</b>      | 32             | 11.8                                                                                  | 11.1               | 11.9                          | 11.1                         |
|                      | 33             |                                                                                       |                    |                               |                              |
|                      | 34             | 12.3                                                                                  | 27.2               | 12.2                          | 28.4                         |
| <b>Scheme 5</b>      | 37             |                                                                                       |                    |                               |                              |
|                      | <b>AVERAGE</b> | <b>12.0</b>                                                                           | <b>19.1</b>        | <b>12.0</b>                   | <b>19.7</b>                  |

In order to describe the thermodynamics of the processes depicted in the manuscript in schemes 2, 3, 5 and 6, the  $\Delta G^{\text{sol}}$  values were computed for reactions 1-8 (as well as 11-18, 21-28, 32-34, and 37), in both **DMSO** and **THF**. Individual (unique) reactions in this list are reactions 1-8, the rest of the reactions are just modifications of reactions 1-8. For example, reactions 11-18 are reactions 1-8, but with the addition of LiCl fixed on the N1 atom. In a series of reactions 21-28 LiCl is no longer fixed, i.e. LiCl has isomeric freedom and can occupy another most favorable by free energy position (if any) in the substrate molecule. Reactions 32-34 and 37 are modifications of reactions 4 and 7, but with the addition of  $\text{MgCl}_2$ .

Reaction 1 (**Figure TF6, Table TT 3**) shows well that the product of the reaction between the  $\text{TMPMgCl}$  molecule and compound **6** is most thermodynamically stable in position 3 (only here the free energy is negative), which agrees with the experiment with the reagent  $\text{TMPMgCl}\cdot\text{LiCl}$  (**11**). In reactions 2 and 5, we simulate a zincation reaction by mixture **12** ( $\text{TMP}_2\text{Zn}\cdot 2\text{MgCl}_2\cdot 2\text{LiCl}$ ) in scheme 3 and 5 in manuscript, but as a reactant we consider a  $\text{TMPZnCl}$  particle that can be formed by this process:  $2 \text{TMP}_2\text{Zn} + \text{LiCl} \rightarrow \text{TMPZn}^+\text{Cl}^- + \text{Li}^+\text{TMP}_3\text{Zn}^-$ . Comparing reactions 1 and 2, we see the effect of the metal change: position 3 is still the most favourable in terms of free energy, although other positions also began to show negative free energies, especially position 5. Compared to reaction 3, the  $\text{TMP}_2\text{Zn}$  substrate in reactions 3 and 4 more reflects the experimental mixture **12** ( $\text{TMP}_2\text{Zn}\cdot 2\text{MgCl}_2\cdot 2\text{LiCl}$ ). We can see that position 5 is preferred in reactions 3 and 4, although it is slightly more pronounced in reaction 3.

Reactions 6 and 7 describe the thermodynamics of the reaction between **7e** and  $\text{TMP}_2\text{Zn}$ , while the most negative free energy is observed for the 5-intermediate, however, in the experiment, only the 2-intermediate is observed. We assume that the transition state for abstract hydrogen in position 5 (**TS5, Figure TF7** for compound **6**) is sterically hindered by the presence cyano group in position 3 and chlorine in position 6, which does not allow the N atoms from a wide  $\text{TMP}_2\text{Zn}$  molecule to reach the CH5 bond (to form the proton transfer in position 5 - **TS5**), so the reaction is kinetically more favourable in position 2.

The free energy of reaction 7 indicates that when molecules **16e** and  $\text{TMPMgCl}$  react, the 5-intermediate is thermodynamically preferable. We remember that the CH bond in position 5 is more acidic than in position 8. However, only the product in position 8 is observed in the experiment. Here, we note that the free energy for **TS8** is indeed more negative than for **TS5** (**Figure TF7** for compound **16e**).

### Effect of LiCl in position 1

Comparing reaction 1 with 11, and 2 with 12, it can be seen that the addition of LiCl in position 1 greatly reduces the free energy of intermediate in positions 2 and 8, due to the additional stabilizing Li-Cl...M<sup>+2</sup> interaction (where the metal M<sup>+2</sup> is it Mg<sup>+2</sup> or Zn<sup>+2</sup>). It is because of this stabilizing interaction, comparing reaction 4 with 14 by the values of  $\Delta G^{\text{sol}}$  (**THF**), it can be seen that when LiCl is added at position 1 instead of 5-intermediate (experiment), 2-intermediate will be the most stable. Also, comparing reaction 7 with 17, it can be seen that when LiCl is added in position 1 instead of 5-intermediate, 8-intermediate will be the most stable, although 2-intermediate (experiment) is very close in stability to 8-intermediate. Comparing reaction 8 with reaction 18, it can be seen that when LiCl is added in position 1 instead of 5-intermediate, 8-intermediate (experiment) will be the most stable.

### Effect of the isomeric freedom of LiCl

A sufficient difference can be seen only in reactions 21-24 comparing to reaction 11-14 (**Table TT 3**).

### Effect of MgCl<sub>2</sub> in position 1

To describe regioselective zincation in **Scheme 3** and **Scheme 5**, given the composition of the reacting mixture **12** (TMP<sub>2</sub>Zn·2MgCl<sub>2</sub>·2LiCl), we think that instead of LiCl in position 1 (in reactions 14, 17), it would be more correct to consider MgCl<sub>2</sub> in position 1 (reactions 34, 37), because the Mg atom is more electronegative on the Pauling scale (1.31) than the Li atom (0.98). However, adding MgCl<sub>2</sub> in position 1 in reaction 34 does not change the order of product stability compared to reaction 14. Reaction 37 agrees well with the result of reaction 27, making the 2-intermediate molecule **15**·2MgCl<sub>2</sub> almost by -10 kJ/mol more stable in **THF** than the 2-intermediate molecule **15**·2LiCl.

### Effect of temperature on reaction thermodynamics

The results in **Table TT3** are presented for room temperature (298.15 K), however, when recalculating thermal corrections taking into account experimental temperatures in **Table TT4** (in manuscript **scheme 2** at 213.15 K, **scheme 3** and **scheme 5** at 253.15 K, **scheme 6** at 233.15 K), the described trends do not change.

### Error estimation

We conclude that the model describing "product + LiCl in the best position" shows the smallest error independent of the applied temperature (**Table TT5**).

### Simulation of the transition state for the magnesiation reaction

For the molecule **6**, After a detailed conformational analysis (**Figure TF7**), we were able to find only one structure of four-center cyclic<sup>20</sup> transition states at position 3. TS3 is very compact (four-center cyclic) involves both proton transfer and a short C...Mg<sup>2+</sup> distance, both required for the formation of the intermediate. On the other hand, five-center cyclic proton transfer TS were observed in positions 2, 8, and six-center cyclic proton transfer TS in position 5. It is logical that after the proton transfer TS2, TS5 and TS8, the next Mg<sup>2+</sup>-transfer TS should occur to form the expected intermediate in positions 2, 5 and 8 (not observed in the experiment), but we did not do further calculations in this direction.

For the molecule **16e**, **TS8** for proton transfer is more favourable comparing to **TS5**. At the same time, the possibility of LiCl coordination on the N1 atom (the N1 atom is free in **TS8**) is retained to stabilize the resulting 8-intermediate. A similar picture is observed for molecule **6** (**Figure TF7**).

|                               |                                                                                     |                                                                                    |                                                                                      |                                                                                       |
|-------------------------------|-------------------------------------------------------------------------------------|------------------------------------------------------------------------------------|--------------------------------------------------------------------------------------|---------------------------------------------------------------------------------------|
| 3D                            |  |  |   |  |
|                               | TS2                                                                                 | TS3                                                                                | TS5                                                                                  | TS8                                                                                   |
| $\Delta\Delta G^{\text{sol}}$ | +9.7                                                                                | +57.9                                                                              | +22.5                                                                                | 0.0                                                                                   |
| Type                          | five-center cyclic proton transfer                                                  | four-center cyclic proton transfer                                                 | six-center cyclic proton transfer                                                    | five-center cyclic proton transfer                                                    |
| 3D                            | -                                                                                   | -                                                                                  |  |  |
|                               | -                                                                                   | -                                                                                  | TS5                                                                                  | TS8                                                                                   |
| $\Delta\Delta G^{\text{sol}}$ | -                                                                                   | -                                                                                  | +36.0                                                                                | 0.0                                                                                   |
| Type                          | -                                                                                   | -                                                                                  | six-center cyclic proton transfer                                                    | five-center cyclic proton transfer                                                    |

**Figure TF7.** The optimized structures of transitional states of proton/Mg<sup>2+</sup> transfer between the molecule **6** and TMPMgCl·LiCl. The relative TS free energies  $\Delta G^{\text{sol}}$  are in kJ mol<sup>-1</sup> at the CPCM(DMSO)/B3LYP-D3/6-311++G(2df,2p)//B3LYP-D3/6-31++G(2d,p) level of theory for molecule **6** and at the CPCM(DMSO)/B3LYP-D3/6-311++G(2df,2p)//B3LYP-D3/6-31G(d) level of theory for molecule **16e**.

<sup>20</sup> A. A. Vitale, J. San Filippo, J. Am. Chem. Soc. 1982, 104, 7341-7343.

## Conclusions

The presence of a chlorine atom at position 6 makes molecule **6** more acidic and less basic than molecule **3**. Compound **6** is the most N-basic in position 1. Compound **6** is the most CH-acidic in position 5. Coordination of a cationic particles on the N1 atom makes molecule **6** more acidic.

**Scheme 2 in manuscript** shows that the product of the regioselective magnesiation of molecule **6** at position 3 is observed in the experiment. According to our calculations, the most stable product is indeed obtained at position 3 in Reaction 1. Analysis of NBO charges reveals that the C3 atom is the most negatively charged among all carbon atoms in molecule **6** and in the corresponding organometallic product. Therefore, position 3 becomes more stable.

In **Scheme 3 in manuscript**, regioselective zincation of molecule **6** gives the 5-intermediate. The most stable calculated product is indeed the 5-intermediate in reaction 3 and reaction 4. In reaction 3, the 5-intermediate is stabilized by the TMP group, while in reaction 4 the 5-intermediate (molecule **14**) is stabilized due to a more favourable conformation with two intramolecular non-covalent CH...Cl interactions.

In **Scheme 5 in manuscript**, regioselective zincation of molecule **7e** gives the 2-intermediate. To explain this result, we consider the reaction 25 with the most stable 2-intermediate in both **DMSO** and **THF**. Here, the 2-intermediate is stabilized by the neighbouring LiCl molecule (in the best position: at the N1 atom), which causes the additional stabilizing intramolecular non-covalent Li-Cl...Zn<sup>+2</sup> interaction. The same type of stabilization is observed for the 8-intermediate in reaction 25, despite this, the 2-intermediate is about -10 kJ/mol more stable than the 8-intermediate.

In **Scheme 6 in manuscript**, regioselective magnesiation of molecule **16e** gives the 8-intermediate. Here we propose to consider reaction 18 to explain the result, in which the 8-intermediate is stabilized by intramolecular non-covalent Li-Cl...Mg<sup>+2</sup> interaction. Although we do not know the exact reaction mechanism, we carefully assume that the Li-Cl...Mg<sup>+2</sup> interaction provides the most favourable transition state for the reaction to Scheme 6.



## Thermodynamic analysis of pKa

**Table TT6.** The calculated for pK<sub>a</sub> values at the CPCMD(SMO)/B3LYP-D3/6-311++G(2df,2p)//B3LYP-D3/6-31++G(2d,p) level of theory(T = 298.15 K).  
"E1 and E2" – educt 1 and educt 2, "P1 and P2" – product 1 and product 2.

| charge |    |    |    | filename    |            |             |              | pK <sub>a</sub> | ΔpK <sub>a</sub> | ΔG <sup>sol</sup><br>kJ/mol | G <sup>sol</sup> |              |               |              | ΔG <sup>sol</sup> |     |      |     |
|--------|----|----|----|-------------|------------|-------------|--------------|-----------------|------------------|-----------------------------|------------------|--------------|---------------|--------------|-------------------|-----|------|-----|
| E1     | E2 | P1 | P2 | E1          | E2         | P1          | P2           |                 |                  |                             | E1               | E2           | P1            | P2           | E1                | E2  | P1   | P2  |
| 1      | 0  | 0  | 1  | p4_mol6     | pyrimidine | mol6        | p_pyrimidine | -46.9           | -47.5            | -271.2                      | -855.9115716     | -264.3717510 | -855.5920739  | -264.7945278 | 286.0             | 0.0 | 0.0  | 0.0 |
| 1      | 0  | 0  | 1  | p1_mol7e    | pyrimidine | mol7e       | p_pyrimidine | -2.4            | -3.0             | -17.0                       | -948.2858086     | -264.3717510 | -947.8694988  | -264.7945278 | 0.0               | 0.0 | 0.0  | 0.0 |
| 1      | 0  | 0  | 1  | p7_mol7e    | pyrimidine | mol7e       | p_pyrimidine | -5.9            | -6.4             | -36.6                       | -948.2783236     | -264.3717510 | -947.8694988  | -264.7945278 | 19.7              | 0.0 | 0.0  | 0.0 |
| 1      | 0  | 0  | 1  | p4_mol7e    | pyrimidine | mol7e       | p_pyrimidine | -53.7           | -54.2            | -309.7                      | -948.1743124     | -264.3717510 | -947.8694988  | -264.7945278 | 292.7             | 0.0 | 0.0  | 0.0 |
| 1      | 0  | 0  | 1  | p1_mol16e_2 | pyrimidine | mol16e_2    | p_pyrimidine | -1.2            | -1.8             | -10.2                       | -1293.9000730    | -264.3717510 | -1293.4811947 | -264.7945278 | 0.0               | 0.0 | 0.0  | 0.0 |
| 1      | 0  | 0  | 1  | p7_mol16e_1 | pyrimidine | mol16e_2    | p_pyrimidine | -4.9            | -5.5             | -31.4                       | -1293.8920181    | -264.3717510 | -1293.4811947 | -264.7945278 | 21.1              | 0.0 | 0.0  | 0.0 |
| 1      | 0  | 0  | 1  | p7_mol16e_2 | pyrimidine | mol16e_2    | p_pyrimidine | -4.9            | -5.5             | -31.3                       | -1293.8920541    | -264.3717510 | -1293.4811947 | -264.7945278 | 21.1              | 0.0 | 0.0  | 0.0 |
| 1      | 0  | 0  | 1  | p4_mol16e_2 | pyrimidine | mol16e_2    | p_pyrimidine | -49.5           | -50.0            | -285.6                      | -1293.7951849    | -264.3717510 | -1293.4811947 | -264.7945278 | 275.4             | 0.0 | 0.0  | 0.0 |
| 0      | -1 | -1 | 0  | mol3        | d2_furan   | d5_mol3     | furan        | 29.8            | -5.2             | -29.8                       | -395.9537295     | -229.5392932 | -395.4383573  | -230.0660281 | 0.0               | 0.0 | 0.0  | 0.0 |
| 0      | -1 | -1 | 0  | mol3        | d2_furan   | d3_mol3     | furan        | 30.7            | -4.3             | -24.7                       | -395.9537295     | -229.5392932 | -395.4364176  | -230.0660281 | 0.0               | 0.0 | 5.1  | 0.0 |
| 0      | -1 | -1 | 0  | mol3        | d2_furan   | d8_mol3     | furan        | 36.6            | 1.6              | 9.0                         | -395.9537295     | -229.5392932 | -395.4235533  | -230.0660281 | 0.0               | 0.0 | 38.9 | 0.0 |
| 0      | -1 | -1 | 0  | mol3        | d2_furan   | d2_mol3     | furan        | 38.2            | 3.2              | 18.5                        | -395.9537295     | -229.5392932 | -395.4199480  | -230.0660281 | 0.0               | 0.0 | 48.3 | 0.0 |
| 0      | -1 | -1 | 0  | mol3        | d2_furan   | d6_mol3     | furan        | 39.0            | 4.0              | 23.1                        | -395.9537295     | -229.5392932 | -395.4182068  | -230.0660281 | 0.0               | 0.0 | 52.9 | 0.0 |
| 0      | -1 | -1 | 0  | mol6        | d2_furan   | d5_mol6     | furan        | 24.9            | -10.1            | -57.5                       | -855.5920739     | -229.5392932 | -855.0872382  | -230.0660281 | 0.0               | 0.0 | 0.0  | 0.0 |
| 0      | -1 | -1 | 0  | mol6        | d2_furan   | d3_mol6     | furan        | 29.1            | -5.9             | -33.6                       | -855.5920739     | -229.5392932 | -855.0781373  | -230.0660281 | 0.0               | 0.0 | 23.9 | 0.0 |
| 0      | -1 | -1 | 0  | mol6        | d2_furan   | d8_mol6     | furan        | 33.4            | -1.6             | -9.2                        | -855.5920739     | -229.5392932 | -855.0688453  | -230.0660281 | 0.0               | 0.0 | 48.3 | 0.0 |
| 0      | -1 | -1 | 0  | mol6        | d2_furan   | d2_mol6     | furan        | 37.0            | 2.0              | 11.2                        | -855.5920739     | -229.5392932 | -855.0610782  | -230.0660281 | 0.0               | 0.0 | 68.7 | 0.0 |
| 0      | -1 | -1 | 0  | mol7e       | d2_furan   | d5_mol7e    | furan        | 20.6            | -14.4            | -82.3                       | -947.8694988     | -229.5392932 | -947.3741029  | -230.0660281 | 0.0               | 0.0 | 0.0  | 0.0 |
| 0      | -1 | -1 | 0  | mol7e       | d2_furan   | d2_mol7e    | furan        | 30.2            | -4.8             | -27.7                       | -947.8694988     | -229.5392932 | -947.3533042  | -230.0660281 | 0.0               | 0.0 | 54.6 | 0.0 |
| 0      | -1 | -1 | 0  | mol7e       | d2_furan   | d8_mol7e    | furan        | 30.0            | -5.0             | -28.4                       | -947.8694988     | -229.5392932 | -947.3535848  | -230.0660281 | 0.0               | 0.0 | 53.9 | 0.0 |
| 0      | -1 | -1 | 0  | mol16e_2    | d2_furan   | d5_mol16e_2 | furan        | 21.4            | -13.6            | -77.7                       | -1293.4811947    | -229.5392932 | -1292.9840515 | -230.0660281 | 0.0               | 0.0 | 0.0  | 0.0 |
| 0      | -1 | -1 | 0  | mol16e_2    | d2_furan   | d5_mol16e_1 | furan        | 21.5            | -13.5            | -77.3                       | -1293.4811947    | -229.5392932 | -1292.9839067 | -230.0660281 | 0.0               | 0.0 | 0.4  | 0.0 |
| 0      | -1 | -1 | 0  | mol16e_2    | d2_furan   | d8_mol16e_2 | furan        | 30.8            | -4.2             | -23.7                       | -1293.4811947    | -229.5392932 | -1292.9634841 | -230.0660281 | 0.0               | 0.0 | 54.0 | 0.0 |
| 0      | -1 | -1 | 0  | mol16e_2    | d2_furan   | d8_mol16e_1 | furan        | 30.8            | -4.2             | -23.7                       | -1293.4811947    | -229.5392932 | -1292.9634841 | -230.0660281 | 0.0               | 0.0 | 54.0 | 0.0 |

**Table TT7.** The calculated for pK<sub>a</sub> values at the CPCMD(SMO)/B3LYP-D3/6-311++G(2df,2p)//B3LYP-D3/6-31++G(2d,p) level of theory (T = 298.15 K).  
"E1 and E2" – educt 1 and educt 2, "P1 and P2" – product 1 and product 2. Lewis acid locally applied to nitrogen atom 1.

| charge |    |    |    | filename             |          |                         |       | pK <sub>a</sub> | ΔpK <sub>a</sub> | ΔG <sup>sol</sup><br>kJ/mol | G <sup>sol</sup> |              |               |              | ΔG <sup>sol</sup> |     |      |     |
|--------|----|----|----|----------------------|----------|-------------------------|-------|-----------------|------------------|-----------------------------|------------------|--------------|---------------|--------------|-------------------|-----|------|-----|
| E1     | E2 | P1 | P2 | E1                   | E2       | P1                      | P2    |                 |                  |                             | E1               | E2           | P1            | P2           | E1                | E2  | P1   | P2  |
| 0      | -1 | -1 | 0  | mol3                 | d2_furan | d5_mol3                 | furan | 29.8            | -5.2             | -29.8                       | -395.9537295     | -229.5392932 | -395.4383573  | -230.0660281 | 0.0               | 0.0 | 0.0  | 0.0 |
| 0      | -1 | -1 | 0  | mol6                 | d2_furan | d5_mol6                 | furan | 24.9            | -10.1            | -57.5                       | -855.5920739     | -229.5392932 | -855.0872382  | -230.0660281 | 0.0               | 0.0 | 0.0  | 0.0 |
| 0      | -1 | -1 | 0  | 1_LiCl_mol6_1        | d2_furan | 1_LiCl_d5_mol6_1        | furan | 22.7            | -12.3            | -70.1                       | -1323.5065405    | -229.5392932 | -1323.0065105 | -230.0660281 | 0.0               | 0.0 | 0.0  | 0.0 |
| 2      | -1 | 1  | 0  | 1_Mg_mol6            | d2_furan | 1_Mg_d8_mol6            | furan | 15.5            | -19.5            | -111.2                      | -1055.4895181    | -229.5392932 | -1055.0051525 | -230.0660281 | 0.0               | 0.0 | 0.0  | 0.0 |
| 1      | -1 | 0  | 0  | 1_MgCl_mol6_1        | d2_furan | 1_MgCl_d8_mol6          | furan | 17.9            | -17.1            | -97.4                       | -1515.9510196    | -229.5392932 | -1515.4613857 | -230.0660281 | 0.0               | 0.0 | 0.0  | 0.0 |
| 0      | -1 | -1 | 0  | 1_MgCl2_mol6         | d2_furan | 1_MgCl2_d5_mol6         | furan | 21.3            | -13.7            | -78.3                       | -1976.4042333    | -229.5392932 | -1975.9073272 | -230.0660281 | 0.0               | 0.0 | 0.0  | 0.0 |
| 0      | -1 | -1 | 0  | 1_C2H6NMgCl_mol6_aab | d2_furan | 1_C2H6NMgCl_d5_mol6_aab | furan | 21.9            | -13.1            | -74.8                       | -1650.6399503    | -229.5392932 | -1650.1416971 | -230.0660281 | 0.0               | 0.0 | 0.0  | 0.0 |
| 0      | -1 | -1 | 0  | 1_TMPMgCl_mol6_2     | d2_furan | 1_TMPMgCl_d5_mol6_2     | furan | 22.0            | -13.0            | -73.9                       | -1924.5750199    | -229.5392932 | -1924.0764462 | -230.0660281 | 0.0               | 0.0 | 0.0  | 0.0 |
| 2      | -1 | 1  | 0  | 1_Zn_mol6            | d2_furan | 1_Zn_d8_mol6            | furan | 6.4             | -28.6            | -163.2                      | -2634.6553014    | -229.5392932 | -2634.1907114 | -230.0660281 | 0.0               | 0.0 | 0.0  | 0.0 |
| 1      | -1 | 0  | 0  | 1_ZnCl_mol6_2        | d2_furan | 1_ZnCl_d8_mol6          | furan | 4.8             | -30.2            | -172.2                      | -3095.1365133    | -229.5392932 | -3094.6753687 | -230.0660281 | 0.0               | 0.0 | 0.0  | 0.0 |
| 0      | -1 | -1 | 0  | 1_ZnCl2_mol6         | d2_furan | 1_ZnCl2_d8_mol6         | furan | 12.6            | -22.4            | -128.1                      | -3555.5867828    | -229.5392932 | -3555.1088479 | -230.0660281 | 0.0               | 0.0 | 0.0  | 0.0 |
| 0      | -1 | -1 | 0  | 1_C2H6NZnCl_mol6_aab | d2_furan | 1_C2H6NZnCl_d5_mol6_aab | furan | 21.3            | -13.7            | -78.3                       | -3229.8319033    | -229.5392932 | -3229.3350082 | -230.0660281 | 0.0               | 0.0 | 0.0  | 0.0 |
| 0      | -1 | -1 | 0  | 1_TMPZnCl_mol6_2     | d2_furan | 1_TMPZnCl_d5_mol6_2     | furan | 21.1            | -13.9            | -79.1                       | -3503.7704027    | -229.5392932 | -3503.2738089 | -230.0660281 | 0.0               | 0.0 | 0.0  | 0.0 |
| 2      | -1 | 1  | 0  | 1_Mg_mol6            | d2_furan | 1_Mg_d8_mol6            | furan | 15.5            | -19.5            | -111.2                      | -1055.4895181    | -229.5392914 | -1055.0051525 | -230.0660281 | 0.0               | 0.0 | 0.0  | 0.0 |
| 2      | -1 | 1  | 0  | 1_Mg_mol6            | d2_furan | 1_Mg_d5_mol6            | furan | 18.8            | -16.2            | -92.7                       | -1055.4895181    | -229.5392914 | -1054.9980792 | -230.0660281 | 0.0               | 0.0 | 18.6 | 0.0 |
| 2      | -1 | 1  | 0  | 1_Mg_mol6            | d2_furan | 1_Mg_d3_mol6            | furan | 21.3            | -13.7            | -78.5                       | -1055.4895181    | -229.5392914 | -1054.9926645 | -230.0660281 | 0.0               | 0.0 | 32.8 | 0.0 |



**Table TT8.** The calculated for pK<sub>a</sub> values at the CPCM(DMSO)/B3LYP-D3/6-311++G(2df,2p)//B3LYP-D3/6-31++G(2d,p) level of theory (T = 298.15 K).  
 "E1 and E2" – educt 1 and educt 2, "P1 and P2" – product 1 and product 2. Structures in which the Lewis acid occupies the best by G<sup>sol</sup> position.

| charge |    |    |    | filename           |          |                       |       | pK <sub>a</sub> | ΔpK <sub>a</sub> | ΔG <sup>sol</sup><br>kJ/mol | G <sup>sol</sup> |              |               |              | ΔG <sup>sol</sup> |     |     |     |
|--------|----|----|----|--------------------|----------|-----------------------|-------|-----------------|------------------|-----------------------------|------------------|--------------|---------------|--------------|-------------------|-----|-----|-----|
| E1     | E2 | P1 | P2 | E1                 | E2       | P1                    | P2    |                 |                  |                             | E1               | E2           | P1            | P2           | E1                | E2  | P1  | P2  |
| 2      | -1 | 1  | 0  | 1_Mg_mol6          | d2_furan | 3_Mg_d3_mol6          | furan | 8.7             | -26.3            | -150.1                      | -1055.4895181    | -229.5392932 | -1055.0199463 | -230.0660281 | 0.0               | 0.0 | 0.0 | 0.0 |
| 1      | -1 | 0  | 0  | MgCl_mol6_aal      | d2_furan | Cl_Mg3_d3_mol6_aad    | furan | 13.0            | -22.0            | -125.8                      | -1515.9516214    | -229.5392932 | -1515.4727936 | -230.0660281 | 0.0               | 0.0 | 0.0 | 0.0 |
| 0      | -1 | -1 | 0  | MgCl2_mol6_aac     | d2_furan | MgCl2_d5_mol6_aaa     | furan | 15.1            | -19.9            | -113.4                      | -1976.4042295    | -229.5392932 | -1975.9207015 | -230.0660281 | 0.0               | 0.0 | 0.0 | 0.0 |
| 0      | -1 | -1 | 0  | C2H6NMgCl_mol6_aab | d2_furan | C2H6NMgCl_d5_mol6_aaa | furan | 16.0            | -19.0            | -108.5                      | -1650.6399503    | -229.5392932 | -1650.1545379 | -230.0660281 | 0.0               | 0.0 | 0.0 | 0.0 |
| 0      | -1 | -1 | 0  | TMPMgCl_mol6_aal   | d2_furan | TMPMgCl_d5_mol6_aac   | furan | 16.9            | -18.1            | -103.5                      | -1924.5750194    | -229.5392932 | -1924.0876957 | -230.0660281 | 0.0               | 0.0 | 0.0 | 0.0 |
| 2      | -1 | 1  | 0  | 1_Zn_mol6          | d2_furan | Zn3_d3_mol6           | furan | -4.8            | -39.8            | -227.0                      | -2634.6553014    | -229.5392932 | -2634.2150263 | -230.0660281 | 0.0               | 0.0 | 0.0 | 0.0 |
| 1      | -1 | 0  | 0  | ZnCl_mol6_aag      | d2_furan | Cl_Zn3_d3_mol6_aap    | furan | 2.1             | -32.9            | -187.9                      | -3095.1365131    | -229.5392932 | -3094.6813378 | -230.0660281 | 0.0               | 0.0 | 0.0 | 0.0 |
| 0      | -1 | -1 | 0  | ZnCl2_mol6_aai     | d2_furan | ZnCl2_d5_mol6_aaa     | furan | 8.5             | -26.5            | -151.3                      | -3555.5867828    | -229.5392932 | -3555.1176838 | -230.0660281 | 0.0               | 0.0 | 0.0 | 0.0 |
| 0      | -1 | -1 | 0  | C2H6NZnCl_mol6_aak | d2_furan | C2H6NZnCl_d5_mol6_aad | furan | 9.5             | -25.5            | -145.6                      | -3229.8319034    | -229.5392932 | -3229.3606175 | -230.0660281 | 0.0               | 0.0 | 0.0 | 0.0 |
| 0      | -1 | -1 | 0  | TMPZnCl_mol6_aax   | d2_furan | TMPZnCl_d5_mol6_aao   | furan | 10.8            | -24.2            | -138.0                      | -3503.7695942    | -229.5392932 | -3503.2954256 | -230.0660281 | 0.0               | 0.0 | 0.0 | 0.0 |

## Thermodynamic analysis of the intermediate

**Table TT9.** The calculated for reaction free energy values at the CPCM(DMSO)/B3LYP-D3/6-311++G(2df,2p)//B3LYP-D3/6-31++G(2d,p) level of theory (T = 298.15 K).  
 "E1 and E2" – educt 1 and educt 2, "P1 and P2" – product 1 and product 2.

| charge |    |    |    | filename |          |                    |        | ΔG <sup>sol</sup><br>kJ/mol | G <sup>sol</sup> |               |               |               | ΔG <sup>sol</sup> |     |     |      |     |
|--------|----|----|----|----------|----------|--------------------|--------|-----------------------------|------------------|---------------|---------------|---------------|-------------------|-----|-----|------|-----|
| E1     | E2 | P1 | P2 | E1       | E2       | P1                 | P2     |                             | E1               | E2            | P1            | P2            | E1                | E2  | P1  | P2   |     |
| 0      | 0  | 0  | 0  | mol6     | TMPMgCl  | Cl_Mg3_d3_mol6_aad | TMPH_1 | reaction1                   | -11.4            | -855.5920739  | -1068.9731777 | -1515.4727936 | -409.0967962      | 0.0 | 0.0 | 0.0  | 0.0 |
| 0      | 0  | 0  | 0  | mol6     | TMPZnCl  | Cl_Zn3_d3_mol6_aap | TMPH_1 | reaction2                   | -22.4            | -855.5920739  | -2648.1775221 | -3094.6813378 | -409.0967962      | 0.0 | 0.0 | 0.0  | 0.0 |
| 0      | 0  | 0  | 0  | mol6     | TMP2Zn_1 | 5_TMPZn_d5_mol6_b  | TMPH_1 | reaction3                   | -17.4            | -855.5920739  | -2596.3659178 | -3042.8678070 | -409.0967962      | 0.0 | 0.0 | 0.0  | 0.0 |
| 0      | 0  | 0  | 0  | mol6     | TMP2Zn_1 | mol14_pos5         | TMPH_1 | reaction4                   | -35.7            | -855.5920739  | -2596.3659178 | -3489.3700527 | -409.0967962      | 0.0 | 0.0 | 0.0  | 0.0 |
| 0      | 0  | 0  | 0  | mol7e    | TMPZnCl  | 5_ZnCl_d5_mol7e    | TMPH_1 | reaction5                   | -17.9            | -947.8694988  | -2648.1775221 | -3186.9570329 | -409.0967962      | 0.0 | 0.0 | 0.0  | 0.0 |
| 0      | 0  | 0  | 0  | mol7e    | TMP2Zn_1 | 5_TMPZn_d5_mol7e   | TMPH_1 | reaction6                   | -15.0            | -947.8694988  | -2596.3659178 | -3135.1443211 | -409.0967962      | 0.0 | 0.0 | 0.0  | 0.0 |
| 0      | 0  | 0  | 0  | mol7e    | TMP2Zn_1 | mol15_pos5         | TMPH_1 | reaction7                   | -31.6            | -947.8694988  | -2596.3659178 | -3673.9233642 | -409.0967962      | 0.0 | 0.0 | 0.0  | 0.0 |
| 0      | 0  | 0  | 0  | mol16e_2 | TMPMgCl  | mol17_pos5_2       | TMPH_1 | reaction8                   | -9.3             | -1293.4811947 | -1068.9731777 | -1953.3611227 | -409.0967962      | 0.0 | 0.0 | 0.0  | 0.0 |
| 0      | 0  | 0  | 0  | mol6     | TMPMgCl  | Cl_Mg3_d3_mol6_aad | TMPH_1 |                             | -11.4            | -855.5920739  | -1068.9731777 | -1515.4727936 | -409.0967962      | 0.0 | 0.0 | 0.0  | 0.0 |
| 0      | 0  | 0  | 0  | mol6     | TMPMgCl  | Cl_Mg3_d3_mol6_aaq | TMPH_1 |                             | -11.4            | -855.5920739  | -1068.9731777 | -1515.4727883 | -409.0967962      | 0.0 | 0.0 | 0.0  | 0.0 |
| 0      | 0  | 0  | 0  | mol6     | TMPMgCl  | Cl_Mg5_d5_mol6_aaa | TMPH_1 |                             | 6.9              | -855.5920739  | -1068.9731777 | -1515.4658247 | -409.0967962      | 0.0 | 0.0 | 18.3 | 0.0 |
| 0      | 0  | 0  | 0  | mol6     | TMPMgCl  | Cl_Mg8_d8_mol6_aar | TMPH_1 |                             | 19.4             | -855.5920739  | -1068.9731777 | -1515.4610636 | -409.0967962      | 0.0 | 0.0 | 30.8 | 0.0 |
| 0      | 0  | 0  | 0  | mol6     | TMPMgCl  | Cl_Mg2_d2_mol6_aaa | TMPH_1 |                             | 39.6             | -855.5920739  | -1068.9731777 | -1515.4533543 | -409.0967962      | 0.0 | 0.0 | 51.0 | 0.0 |
| 0      | 0  | 0  | 0  | mol6     | TMPZnCl  | Cl_Zn3_d3_mol6_aap | TMPH_1 |                             | -22.4            | -855.5920739  | -2648.1775221 | -3094.6813378 | -409.0967962      | 0.0 | 0.0 | 0.0  | 0.0 |
| 0      | 0  | 0  | 0  | mol6     | TMPZnCl  | Cl_Zn5_d5_mol6_aae | TMPH_1 |                             | -19.8            | -855.5920739  | -2648.1775221 | -3094.6803399 | -409.0967962      | 0.0 | 0.0 | 2.6  | 0.0 |
| 0      | 0  | 0  | 0  | mol6     | TMPZnCl  | Cl_Zn8_d8_mol6_aac | TMPH_1 |                             | -6.2             | -855.5920739  | -2648.1775221 | -3094.6751758 | -409.0967962      | 0.0 | 0.0 | 16.2 | 0.0 |
| 0      | 0  | 0  | 0  | mol6     | TMPZnCl  | Cl_Zn2_d2_mol6_aaq | TMPH_1 |                             | -2.2             | -855.5920739  | -2648.1775221 | -3094.6736351 | -409.0967962      | 0.0 | 0.0 | 20.2 | 0.0 |
| 0      | 0  | 0  | 0  | mol6     | TMP2Zn_1 | 5_TMPZn_d5_mol6_b  | TMPH_1 |                             | -17.4            | -855.5920739  | -2596.3659178 | -3042.8678070 | -409.0967962      | 0.0 | 0.0 | 0.0  | 0.0 |
| 0      | 0  | 0  | 0  | mol6     | TMP2Zn_1 | 5_TMPZn_d5_mol6_a  | TMPH_1 |                             | -16.5            | -855.5920739  | -2596.3659178 | -3042.8674641 | -409.0967962      | 0.0 | 0.0 | 0.9  | 0.0 |
| 0      | 0  | 0  | 0  | mol6     | TMP2Zn_1 | 3_TMPZn_d3_mol6_a  | TMPH_1 |                             | -13.5            | -855.5920739  | -2596.3659178 | -3042.8663447 | -409.0967962      | 0.0 | 0.0 | 3.8  | 0.0 |
| 0      | 0  | 0  | 0  | mol6     | TMP2Zn_1 | 3_TMPZn_d3_mol6_b  | TMPH_1 |                             | -13.5            | -855.5920739  | -2596.3659178 | -3042.8663443 | -409.0967962      | 0.0 | 0.0 | 3.8  | 0.0 |
| 0      | 0  | 0  | 0  | mol6     | TMP2Zn_1 | 8_TMPZn_d8_mol6_a  | TMPH_1 |                             | 5.2              | -855.5920739  | -2596.3659178 | -3042.8592231 | -409.0967962      | 0.0 | 0.0 | 22.5 | 0.0 |
| 0      | 0  | 0  | 0  | mol6     | TMP2Zn_1 | 2_TMPZn_d2_mol6_a  | TMPH_1 |                             | 10.7             | -855.5920739  | -2596.3659178 | -3042.8571388 | -409.0967962      | 0.0 | 0.0 | 28.0 | 0.0 |
| 0      | 0  | 0  | 0  | mol6     | TMP2Zn_1 | mol14_pos5         | TMPH_1 |                             | -35.7            | -855.5920739  | -2596.3659178 | -3489.3700527 | -409.0967962      | 0.0 | 0.0 | 0.0  | 0.0 |
| 0      | 0  | 0  | 0  | mol6     | TMP2Zn_1 | mol14_pos3         | TMPH_1 |                             | -33.7            | -855.5920739  | -2596.3659178 | -3489.3692920 | -409.0967962      | 0.0 | 0.0 | 2.0  | 0.0 |
| 0      | 0  | 0  | 0  | mol6     | TMP2Zn_1 | mol14_pos8         | TMPH_1 |                             | 0.2              | -855.5920739  | -2596.3659178 | -3489.3564080 | -409.0967962      | 0.0 | 0.0 | 35.8 | 0.0 |
| 0      | 0  | 0  | 0  | mol6     | TMP2Zn_1 | mol14_pos2         | TMPH_1 |                             | 8.8              | -855.5920739  | -2596.3659178 | -3489.3531155 | -409.0967962      | 0.0 | 0.0 | 44.5 | 0.0 |
| 0      | 0  | 0  | 0  | mol7e    | TMPZnCl  | 5_ZnCl_d5_mol7e    | TMPH_1 |                             | -17.9            | -947.8694988  | -2648.1775221 | -3186.9570329 | -409.0967962      | 0.0 | 0.0 | 0.0  | 0.0 |
| 0      | 0  | 0  | 0  | mol7e    | TMPZnCl  | 2_ZnCl_d2_mol7e    | TMPH_1 |                             | -13.0            | -947.8694988  | -2648.1775221 | -3186.9551800 | -409.0967962      | 0.0 | 0.0 | 4.9  | 0.0 |





|   |   |   |   |                 |          |                            |        |            |  |       |               |               |               |              |     |     |       |     |
|---|---|---|---|-----------------|----------|----------------------------|--------|------------|--|-------|---------------|---------------|---------------|--------------|-----|-----|-------|-----|
|   |   |   |   | 1_LiCl_mol7e    | TMP2Zn_1 | 1_LiCl_5TMPZn_d5_mol7e_38  | TMPH_1 |            |  | -0.1  | -1415.7817642 | -2596.3659178 | -3603.0509327 | -409.0967962 | 0.0 | 0.0 | 16.9  | 0.0 |
|   |   |   |   | 1_LiCl_mol7e    | TMP2Zn_1 | 1_LiCl_5TMPZn_d5_mol7e_1   | TMPH_1 |            |  | 0.4   | -1415.7817642 | -2596.3659178 | -3603.0507159 | -409.0967962 | 0.0 | 0.0 | 17.5  | 0.0 |
|   |   |   |   | 1_LiCl_mol7e    | TMP2Zn_1 | LiCl_2TMPZn_d2_mol7e_28    | TMPH_1 |            |  | 2.9   | -1415.7817642 | -2596.3659178 | -3603.0497945 | -409.0967962 | 0.0 | 0.0 | 19.9  | 0.0 |
|   |   |   |   | 1_LiCl_mol7e    | TMP2Zn_1 | LiCl_5TMPZn_d5_mol7e_38    | TMPH_1 |            |  | 4.3   | -1415.7817642 | -2596.3659178 | -3603.0492570 | -409.0967962 | 0.0 | 0.0 | 21.3  | 0.0 |
|   |   |   |   | 1_LiCl_mol7e    | TMP2Zn_1 | 1_LiCl_8TMPZn_d8_mol7e_20  | TMPH_1 |            |  | 6.1   | -1415.7817642 | -2596.3659178 | -3603.0485780 | -409.0967962 | 0.0 | 0.0 | 23.1  | 0.0 |
|   |   |   |   | 1_LiCl_mol7e    | TMP2Zn_1 | LiCl_5TMPZn_d5_mol7e_36    | TMPH_1 |            |  | 6.5   | -1415.7817642 | -2596.3659178 | -3603.0483997 | -409.0967962 | 0.0 | 0.0 | 23.6  | 0.0 |
|   |   |   |   | 1_LiCl_mol7e    | TMP2Zn_1 | 1_LiCl_mol15_pos2_15       | TMPH_1 |            |  | -64.9 | -1415.7817642 | -2596.3659178 | -4609.7605802 | -409.0967962 | 0.0 | 0.0 | 0.0   | 0.0 |
|   |   |   |   | 1_LiCl_mol7e    | TMP2Zn_1 | 1_LiCl_mol15_pos8_19       | TMPH_1 |            |  | -62.9 | -1415.7817642 | -2596.3659178 | -4609.7598132 | -409.0967962 | 0.0 | 0.0 | 2.0   | 0.0 |
|   |   |   |   | 1_LiCl_mol7e    | TMP2Zn_1 | LiCl_mol15_pos8            | TMPH_1 |            |  | -56.8 | -1415.7817642 | -2596.3659178 | -4609.7575029 | -409.0967962 | 0.0 | 0.0 | 8.1   | 0.0 |
|   |   |   |   | 1_LiCl_mol7e    | TMP2Zn_1 | 1_LiCl_mol15_pos2_17       | TMPH_1 |            |  | -54.7 | -1415.7817642 | -2596.3659178 | -4609.7566797 | -409.0967962 | 0.0 | 0.0 | 10.2  | 0.0 |
|   |   |   |   | 1_LiCl_mol7e    | TMP2Zn_1 | 1_LiCl_mol15_pos2_13       | TMPH_1 |            |  | -45.8 | -1415.7817642 | -2596.3659178 | -4609.7532802 | -409.0967962 | 0.0 | 0.0 | 19.2  | 0.0 |
|   |   |   |   | 1_LiCl_mol7e    | TMP2Zn_1 | 1_LiCl_mol15_pos8          | TMPH_1 |            |  | -45.0 | -1415.7817642 | -2596.3659178 | -4609.7529765 | -409.0967962 | 0.0 | 0.0 | 20.0  | 0.0 |
|   |   |   |   | 1_LiCl_mol7e    | TMP2Zn_1 | 1_LiCl_mol15_pos2_12       | TMPH_1 |            |  | -41.0 | -1415.7817642 | -2596.3659178 | -4609.7514862 | -409.0967962 | 0.0 | 0.0 | 23.9  | 0.0 |
|   |   |   |   | 1_LiCl_mol7e    | TMP2Zn_1 | 1_LiCl_mol15_pos5          | TMPH_1 |            |  | -33.7 | -1415.7817642 | -2596.3659178 | -4609.7486857 | -409.0967962 | 0.0 | 0.0 | 31.2  | 0.0 |
|   |   |   |   | 1_LiCl_mol7e    | TMP2Zn_1 | LiCl_mol15_pos2_15         | TMPH_1 |            |  | -22.6 | -1415.7817642 | -2596.3659178 | -4609.7444432 | -409.0967962 | 0.0 | 0.0 | 42.4  | 0.0 |
|   |   |   |   | 1_LiCl_mol16e_2 | TMPMgCl  | 1_LiCl_mol17_pos8_2        | TMPH_1 |            |  | -54.4 | -1761.3908362 | -1068.9731777 | -2421.2879207 | -409.0967962 | 0.0 | 0.0 | 0.0   | 0.0 |
|   |   |   |   | 1_LiCl_mol16e_2 | TMPMgCl  | 1_LiCl_mol17_pos8_1        | TMPH_1 |            |  | -54.0 | -1761.3908362 | -1068.9731777 | -2421.2877997 | -409.0967962 | 0.0 | 0.0 | 0.3   | 0.0 |
|   |   |   |   | 1_LiCl_mol16e_2 | TMPMgCl  | LiCl_mol17_pos5_22         | TMPH_1 |            |  | -51.5 | -1761.3908362 | -1068.9731777 | -2421.2868189 | -409.0967962 | 0.0 | 0.0 | 2.9   | 0.0 |
| 0 | 0 | 0 | 0 | MgCl2_mol6_aac  | TMPZnCl  | 1_MgCl2_3ZnCl_d3_mol6_aap  | TMPH_1 | reaction32 |  | -26.5 | -1976.4042295 | -2648.1775221 | -4215.4950591 | -409.0967962 | 0.0 | 0.0 | 0.0   | 0.0 |
| 0 | 0 | 0 | 0 | MgCl2_mol6_aac  | TMP2Zn_1 | 1_MgCl2_5TMPZn_d5_mol6_b   | TMPH_1 | reaction33 |  | -19.6 | -1976.4042295 | -2596.3659178 | -4163.6808048 | -409.0967962 | 0.0 | 0.0 | 0.0   | 0.0 |
| 0 | 0 | 0 | 0 | MgCl2_mol6_aac  | TMP2Zn_1 | 1_MgCl2_mol14_pos3         | TMPH_1 | reaction34 |  | -45.0 | -1976.4042295 | -2596.3659178 | -5730.9979115 | -409.0967962 | 0.0 | 0.0 | 0.0   | 0.0 |
| 0 | 0 | 0 | 0 | 1_MgCl2_mol7e   | TMP2Zn_1 | 1_MgCl2_mol15_pos2_7       | TMPH_1 | reaction37 |  | -69.3 | -2068.6769938 | -2596.3659178 | -5915.5527261 | -409.0967962 | 0.0 | 0.0 | 0.0   | 0.0 |
|   |   |   |   | MgCl2_mol6_aac  | TMPZnCl  | 1_MgCl2_3ZnCl_d3_mol6_aap  | TMPH_1 |            |  | -26.5 | -1976.4042295 | -2648.1775221 | -4215.4950591 | -409.0967962 | 0.0 | 0.0 | 0.0   | 0.0 |
|   |   |   |   | MgCl2_mol6_aac  | TMPZnCl  | 1_MgCl2_5ZnCl_d5_mol6_aae  | TMPH_1 |            |  | -20.9 | -1976.4042295 | -2648.1775221 | -4215.4929096 | -409.0967962 | 0.0 | 0.0 | 5.6   | 0.0 |
|   |   |   |   | MgCl2_mol6_aac  | TMPZnCl  | 1_MgCl2_2ZnCl_d2_mol6_aaq  | TMPH_1 |            |  | -14.6 | -1976.4042295 | -2648.1775221 | -4215.4905129 | -409.0967962 | 0.0 | 0.0 | 11.9  | 0.0 |
|   |   |   |   | MgCl2_mol6_aac  | TMPZnCl  | 1_MgCl2_8ZnCl_d8_mol6_aac2 | TMPH_1 |            |  | -10.7 | -1976.4042295 | -2648.1775221 | -4215.4890386 | -409.0967962 | 0.0 | 0.0 | 15.8  | 0.0 |
|   |   |   |   | MgCl2_mol6_aac  | TMPZnCl  | MgCl2_8ZnCl_d8_mol6_aac23  | TMPH_1 |            |  | 4.4   | -1976.4042295 | -2648.1775221 | -4215.4832755 | -409.0967962 | 0.0 | 0.0 | 30.9  | 0.0 |
|   |   |   |   | MgCl2_mol6_aac  | TMPZnCl  | 1_MgCl2_3ZnCl_d3_mol6_aap2 | TMPH_1 |            |  | 13.2  | -1976.4042295 | -2648.1775221 | -4215.4799259 | -409.0967962 | 0.0 | 0.0 | 39.7  | 0.0 |
|   |   |   |   | MgCl2_mol6_aac  | TMP2Zn_1 | 1_MgCl2_5TMPZn_d5_mol6_b   | TMPH_1 |            |  | -19.6 | -1976.4042295 | -2596.3659178 | -4163.6808048 | -409.0967962 | 0.0 | 0.0 | 0.0   | 0.0 |
|   |   |   |   | MgCl2_mol6_aac  | TMP2Zn_1 | 1_MgCl2_5TMPZn_d5_mol6_a   | TMPH_1 |            |  | -18.6 | -1976.4042295 | -2596.3659178 | -4163.6804378 | -409.0967962 | 0.0 | 0.0 | 1.0   | 0.0 |
|   |   |   |   | MgCl2_mol6_aac  | TMP2Zn_1 | 1_MgCl2_3TMPZn_d3_mol6_a   | TMPH_1 |            |  | -18.2 | -1976.4042295 | -2596.3659178 | -4163.6803011 | -409.0967962 | 0.0 | 0.0 | 1.3   | 0.0 |
|   |   |   |   | MgCl2_mol6_aac  | TMP2Zn_1 | 1_MgCl2_3TMPZn_d3_mol6_b   | TMPH_1 |            |  | -17.7 | -1976.4042295 | -2596.3659178 | -4163.6800971 | -409.0967962 | 0.0 | 0.0 | 1.9   | 0.0 |
|   |   |   |   | MgCl2_mol6_aac  | TMP2Zn_1 | MgCl2_3TMPZn_d3_mol6_a     | TMPH_1 |            |  | -4.6  | -1976.4042295 | -2596.3659178 | -4163.6751080 | -409.0967962 | 0.0 | 0.0 | 15.0  | 0.0 |
|   |   |   |   | MgCl2_mol6_aac  | TMP2Zn_1 | 1_MgCl2_2TMPZn_d2_mol6_c   | TMPH_1 |            |  | -0.2  | -1976.4042295 | -2596.3659178 | -4163.6734198 | -409.0967962 | 0.0 | 0.0 | 19.4  | 0.0 |
|   |   |   |   | MgCl2_mol6_aac  | TMP2Zn_1 | MgCl2_5TMPZn_d5_mol6_aa    | TMPH_1 |            |  | 0.3   | -1976.4042295 | -2596.3659178 | -4163.6732525 | -409.0967962 | 0.0 | 0.0 | 19.8  | 0.0 |
|   |   |   |   | MgCl2_mol6_aac  | TMP2Zn_1 | 1_MgCl2_2TMPZn_d2_mol6_b   | TMPH_1 |            |  | 9.0   | -1976.4042295 | -2596.3659178 | -4163.6699406 | -409.0967962 | 0.0 | 0.0 | 28.5  | 0.0 |
|   |   |   |   | MgCl2_mol6_aac  | TMP2Zn_1 | 1_MgCl2_8TMPZn_d8_mol6_a2  | TMPH_1 |            |  | 13.3  | -1976.4042295 | -2596.3659178 | -4163.6682776 | -409.0967962 | 0.0 | 0.0 | 32.9  | 0.0 |
|   |   |   |   | MgCl2_mol6_aac  | TMP2Zn_1 | 1_MgCl2_mol14_pos3         | TMPH_1 |            |  | -45.0 | -1976.4042295 | -2596.3659178 | -5730.9979115 | -409.0967962 | 0.0 | 0.0 | 0.0   | 0.0 |
|   |   |   |   | MgCl2_mol6_aac  | TMP2Zn_1 | 1_MgCl2_mol14_pos2_27      | TMPH_1 |            |  | -42.1 | -1976.4042295 | -2596.3659178 | -5730.9968147 | -409.0967962 | 0.0 | 0.0 | 2.9   | 0.0 |
|   |   |   |   | MgCl2_mol6_aac  | TMP2Zn_1 | 1_MgCl2_mol14_pos5         | TMPH_1 |            |  | -38.9 | -1976.4042295 | -2596.3659178 | -5730.9956150 | -409.0967962 | 0.0 | 0.0 | 6.0   | 0.0 |
|   |   |   |   | MgCl2_mol6_aac  | TMP2Zn_1 | 1_MgCl2_mol14_pos2         | TMPH_1 |            |  | -16.3 | -1976.4042295 | -2596.3659178 | -5730.9869901 | -409.0967962 | 0.0 | 0.0 | 28.7  | 0.0 |
|   |   |   |   | MgCl2_mol6_aac  | TMP2Zn_1 | 1_MgCl2_mol14_pos5_29      | TMPH_1 |            |  | -6.4  | -1976.4042295 | -2596.3659178 | -5730.9832072 | -409.0967962 | 0.0 | 0.0 | 38.6  | 0.0 |
|   |   |   |   | MgCl2_mol6_aac  | TMP2Zn_1 | 1_MgCl2_mol14_pos5_31      | TMPH_1 |            |  | 8.7   | -1976.4042295 | -2596.3659178 | -5730.9774583 | -409.0967962 | 0.0 | 0.0 | 53.7  | 0.0 |
|   |   |   |   | MgCl2_mol6_aac  | TMP2Zn_1 | 1_MgCl2_mol14_pos8         | TMPH_1 |            |  | 11.0  | -1976.4042295 | -2596.3659178 | -5730.9765892 | -409.0967962 | 0.0 | 0.0 | 56.0  | 0.0 |
|   |   |   |   | MgCl2_mol6_aac  | TMP2Zn_1 | 1_MgCl2_mol14_pos8_1       | TMPH_1 |            |  | 17.6  | -1976.4042295 | -2596.3659178 | -5730.9740868 | -409.0967962 | 0.0 | 0.0 | 62.6  | 0.0 |
|   |   |   |   | 1_MgCl2_mol7e   | TMP2Zn_1 | 1_MgCl2_mol15_pos2_7       | TMPH_1 |            |  | -69.3 | -2068.6769938 | -2596.3659178 | -5915.5527261 | -409.0967962 | 0.0 | 0.0 | 0.0   | 0.0 |
|   |   |   |   | 1_MgCl2_mol7e   | TMP2Zn_1 | 1_MgCl2_mol15_pos2         | TMPH_1 |            |  | -55.2 | -2068.6769938 | -2596.3659178 | -5915.5473257 | -409.0967962 | 0.0 | 0.0 | 14.2  | 0.0 |
|   |   |   |   | 1_MgCl2_mol7e   | TMP2Zn_1 | 1_MgCl2_mol15_pos5         | TMPH_1 |            |  | -34.6 | -2068.6769938 | -2596.3659178 | -5915.5395008 | -409.0967962 | 0.0 | 0.0 | 34.7  | 0.0 |
|   |   |   |   | 1_MgCl2_mol7e   | TMP2Zn_1 | 1_MgCl2_mol15_pos2_9       | TMPH_1 |            |  | -4.9  | -2068.6769938 | -2596.3659178 | -5915.5281738 | -409.0967962 | 0.0 | 0.0 | 64.5  | 0.0 |
|   |   |   |   | 1_MgCl2_mol7e   | TMP2Zn_1 | 1_MgCl2_mol15_pos8         | TMPH_1 |            |  | 4.5   | -2068.6769938 | -2596.3659178 | -5915.5245813 | -409.0967962 | 0.0 | 0.0 | 73.9  | 0.0 |
|   |   |   |   | 1_MgCl2_mol7e   | TMP2Zn_1 | 1_MgCl2_mol15_pos2_5       | TMPH_1 |            |  | 19.2  | -2068.6769938 | -2596.3659178 | -5915.5189952 | -409.0967962 | 0.0 | 0.0 | 88.6  | 0.0 |
|   |   |   |   | 1_MgCl2_mol7e   | TMP2Zn_1 | 1_MgCl2_mol15_pos2_8       | TMPH_1 |            |  | 50.3  | -2068.6769938 | -2596.3659178 | -5915.5071680 | -409.0967962 | 0.0 | 0.0 | 119.6 | 0.0 |
|   |   |   |   | 1_MgCl2_mol7e   | TMP2Zn_1 | 1_MgCl2_mol15_pos5_10      | TMPH_1 |            |  | 84.6  | -2068.6769938 | -2596.3659178 | -5915.4941073 | -409.0967962 | 0.0 | 0.0 | 153.9 | 0.0 |









|  |  |  |  |                |          |                           |        |  |  |       |               |               |               |              |     |     |       |     |
|--|--|--|--|----------------|----------|---------------------------|--------|--|--|-------|---------------|---------------|---------------|--------------|-----|-----|-------|-----|
|  |  |  |  | MgCl2_mol6_aac | TMP2Zn_1 | 1_MgCl2_2TMPZn_d2_mol6_c  | TMPH_1 |  |  | -2.1  | -1976.3982356 | -2596.3642905 | -4163.6668922 | -409.0964418 | 0.0 | 0.0 | 14.5  | 0.0 |
|  |  |  |  | MgCl2_mol6_aac | TMP2Zn_1 | 1_MgCl2_2TMPZn_d2_mol6_b  | TMPH_1 |  |  | 6.4   | -1976.3982356 | -2596.3642905 | -4163.6636290 | -409.0964418 | 0.0 | 0.0 | 23.1  | 0.0 |
|  |  |  |  | MgCl2_mol6_aac | TMP2Zn_1 | 1_MgCl2_8TMPZn_d8_mol6_a2 | TMPH_1 |  |  | 11.2  | -1976.3982356 | -2596.3642905 | -4163.6618276 | -409.0964418 | 0.0 | 0.0 | 27.8  | 0.0 |
|  |  |  |  | MgCl2_mol6_aac | TMP2Zn_1 | 1_MgCl2_mol14_pos2_27     | TMPH_1 |  |  | -49.9 | -1976.3982356 | -2596.3642905 | -5730.9868896 | -409.0964418 | 0.0 | 0.0 | 0.0   | 0.0 |
|  |  |  |  | MgCl2_mol6_aac | TMP2Zn_1 | 1_MgCl2_mol14_pos3        | TMPH_1 |  |  | -32.3 | -1976.3982356 | -2596.3642905 | -5730.9801944 | -409.0964418 | 0.0 | 0.0 | 17.6  | 0.0 |
|  |  |  |  | MgCl2_mol6_aac | TMP2Zn_1 | 1_MgCl2_mol14_pos5        | TMPH_1 |  |  | -28.9 | -1976.3982356 | -2596.3642905 | -5730.9788903 | -409.0964418 | 0.0 | 0.0 | 21.0  | 0.0 |
|  |  |  |  | MgCl2_mol6_aac | TMP2Zn_1 | 1_MgCl2_mol14_pos2        | TMPH_1 |  |  | -21.7 | -1976.3982356 | -2596.3642905 | -5730.9761433 | -409.0964418 | 0.0 | 0.0 | 28.2  | 0.0 |
|  |  |  |  | MgCl2_mol6_aac | TMP2Zn_1 | 1_MgCl2_mol14_pos8        | TMPH_1 |  |  | -2.7  | -1976.3982356 | -2596.3642905 | -5730.9689178 | -409.0964418 | 0.0 | 0.0 | 47.2  | 0.0 |
|  |  |  |  | MgCl2_mol6_aac | TMP2Zn_1 | 1_MgCl2_mol14_pos5_29     | TMPH_1 |  |  | -0.1  | -1976.3982356 | -2596.3642905 | -5730.9678990 | -409.0964418 | 0.0 | 0.0 | 49.9  | 0.0 |
|  |  |  |  | MgCl2_mol6_aac | TMP2Zn_1 | 1_MgCl2_mol14_pos8_1      | TMPH_1 |  |  | 10.4  | -1976.3982356 | -2596.3642905 | -5730.9639295 | -409.0964418 | 0.0 | 0.0 | 60.3  | 0.0 |
|  |  |  |  | MgCl2_mol6_aac | TMP2Zn_1 | 1_MgCl2_mol14_pos5_31     | TMPH_1 |  |  | 20.3  | -1976.3982356 | -2596.3642905 | -5730.9601513 | -409.0964418 | 0.0 | 0.0 | 70.2  | 0.0 |
|  |  |  |  | 1_MgCl2_mol7e  | TMP2Zn_1 | 1_MgCl2_mol15_pos2_7      | TMPH_1 |  |  | -76.5 | -2068.6704954 | -2596.3642905 | -5915.5415206 | -409.0964418 | 0.0 | 0.0 | 0.0   | 0.0 |
|  |  |  |  | 1_MgCl2_mol7e  | TMP2Zn_1 | 1_MgCl2_mol15_pos2        | TMPH_1 |  |  | -59.3 | -2068.6704954 | -2596.3642905 | -5915.5349671 | -409.0964418 | 0.0 | 0.0 | 17.2  | 0.0 |
|  |  |  |  | 1_MgCl2_mol7e  | TMP2Zn_1 | 1_MgCl2_mol15_pos5        | TMPH_1 |  |  | -32.0 | -2068.6704954 | -2596.3642905 | -5915.5245678 | -409.0964418 | 0.0 | 0.0 | 44.5  | 0.0 |
|  |  |  |  | 1_MgCl2_mol7e  | TMP2Zn_1 | 1_MgCl2_mol15_pos2_9      | TMPH_1 |  |  | -19.2 | -2068.6704954 | -2596.3642905 | -5915.5197118 | -409.0964418 | 0.0 | 0.0 | 57.3  | 0.0 |
|  |  |  |  | 1_MgCl2_mol7e  | TMP2Zn_1 | 1_MgCl2_mol15_pos8        | TMPH_1 |  |  | -8.8  | -2068.6704954 | -2596.3642905 | -5915.5157604 | -409.0964418 | 0.0 | 0.0 | 67.6  | 0.0 |
|  |  |  |  | 1_MgCl2_mol7e  | TMP2Zn_1 | 1_MgCl2_mol15_pos2_5      | TMPH_1 |  |  | 7.3   | -2068.6704954 | -2596.3642905 | -5915.5096277 | -409.0964418 | 0.0 | 0.0 | 83.7  | 0.0 |
|  |  |  |  | 1_MgCl2_mol7e  | TMP2Zn_1 | 1_MgCl2_mol15_pos2_8      | TMPH_1 |  |  | 41.1  | -2068.6704954 | -2596.3642905 | -5915.4967287 | -409.0964418 | 0.0 | 0.0 | 117.6 | 0.0 |
|  |  |  |  | 1_MgCl2_mol7e  | TMP2Zn_1 | 1_MgCl2_mol15_pos5_10     | TMPH_1 |  |  | 85.6  | -2068.6704954 | -2596.3642905 | -5915.4797824 | -409.0964418 | 0.0 | 0.0 | 162.1 | 0.0 |

**Table TT11.** The calculated for reaction free energy values at the CPCM(DMSO)/B3LYP-D3/6-311++G(2df,2p)//B3LYP-D3/6-311++G(2d,p) level of theory (T = T<sub>experimental</sub>).  
 "E1 and E2" – educt 1 and educt 2, "P1 and P2" – product 1 and product 2.

| charge |    |    |    | filename        |          |                           |        | ΔG <sup>tot</sup><br>kJ/mol | G <sup>tot</sup> |               |               |               | ΔG <sup>tot</sup> |     |     |      |     |
|--------|----|----|----|-----------------|----------|---------------------------|--------|-----------------------------|------------------|---------------|---------------|---------------|-------------------|-----|-----|------|-----|
| E1     | E2 | P1 | P2 | E1              | E2       | P1                        | P2     |                             | E1               | E2            | P1            | P2            | E1                | E2  | P1  | P2   |     |
| 0      | 0  | 0  | 0  | mol6            | TMPMgCl  | 3_MgCl_d3_mol6_aad        | TMPH_1 | reaction1                   | -10.9            | -855.5811928  | -1068.9586982 | -1515.4595266 | -409.0844975      | 0.0 | 0.0 | 0.0  | 0.0 |
| 0      | 0  | 0  | 0  | mol6            | TMPZnCl  | 3_ZnCl_d3_mol6_aac        | TMPH_1 | reaction2                   | -22.4            | -855.5861724  | -2648.1694763 | -3094.6741201 | -409.0900593      | 0.0 | 0.0 | 0.0  | 0.0 |
| 0      | 0  | 0  | 0  | mol6            | TMP2Zn_1 | 5_TMPZn_d5_mol6_b         | TMPH_1 | reaction3                   | -17.0            | -855.5861724  | -2596.3552027 | -3042.8577834 | -409.0900593      | 0.0 | 0.0 | 0.0  | 0.0 |
| 0      | 0  | 0  | 0  | mol6            | TMP2Zn_1 | mol14_pos5                | TMPH_1 | reaction4                   | -35.0            | -855.5861724  | -2596.3552027 | -3489.3607760 | -409.0900593      | 0.0 | 0.0 | 0.0  | 0.0 |
| 0      | 0  | 0  | 0  | mol7e           | TMPZnCl  | 5_ZnCl_d5_mol7e           | TMPH_1 | reaction5                   | -18.0            | -947.8629812  | -2648.1694763 | -3186.9492594 | -409.0900593      | 0.0 | 0.0 | 0.0  | 0.0 |
| 0      | 0  | 0  | 0  | mol7e           | TMP2Zn_1 | 5_TMPZn_d5_mol7e_36       | TMPH_1 | reaction6                   | -15.1            | -947.8629812  | -2596.3552027 | -3135.1338599 | -409.0900593      | 0.0 | 0.0 | 0.0  | 0.0 |
| 0      | 0  | 0  | 0  | mol7e           | TMP2Zn_1 | mol15_pos5                | TMPH_1 | reaction7                   | -31.7            | -947.8629812  | -2596.3552027 | -3673.9131114 | -409.0900593      | 0.0 | 0.0 | 0.0  | 0.0 |
| 0      | 0  | 0  | 0  | mol16e_2        | TMPMgCl  | mol17_pos5_2              | TMPH_1 | reaction8                   | -10.3            | -1293.4686930 | -1068.9619145 | -1953.3472864 | -409.0872280      | 0.0 | 0.0 | 0.0  | 0.0 |
|        |    |    |    | mol6            | TMPMgCl  | 3_MgCl_d3_mol6_aad        | TMPH_1 |                             | -10.9            | -855.5811928  | -1068.9586982 | -1515.4595266 | -409.0844975      | 0.0 | 0.0 | 0.0  | 0.0 |
|        |    |    |    | mol6            | TMPMgCl  | 3_MgCl_d3_mol6_aaq        | TMPH_1 |                             | -10.8            | -855.5811928  | -1068.9586982 | -1515.4595194 | -409.0844975      | 0.0 | 0.0 | 0.0  | 0.0 |
|        |    |    |    | mol6            | TMPMgCl  | 5_MgCl_d5_mol6_aaa        | TMPH_1 |                             | 7.1              | -855.5811928  | -1068.9586982 | -1515.4526963 | -409.0844975      | 0.0 | 0.0 | 17.9 | 0.0 |
|        |    |    |    | mol6            | TMPMgCl  | 8_MgCl_d8_mol6_aar        | TMPH_1 |                             | 19.3             | -855.5811928  | -1068.9586982 | -1515.4480387 | -409.0844975      | 0.0 | 0.0 | 30.2 | 0.0 |
|        |    |    |    | mol6            | TMPMgCl  | 2_MgCl_d2_mol6_aaa        | TMPH_1 |                             | 39.6             | -855.5811928  | -1068.9586982 | -1515.4402968 | -409.0844975      | 0.0 | 0.0 | 50.5 | 0.0 |
|        |    |    |    | mol6            | TMPZnCl  | 3_ZnCl_d3_mol6_aac        | TMPH_1 |                             | -22.4            | -855.5861724  | -2648.1694763 | -3094.6741201 | -409.0900593      | 0.0 | 0.0 | 0.0  | 0.0 |
|        |    |    |    | mol6            | TMPZnCl  | 3_ZnCl_d3_mol6_aax        | TMPH_1 |                             | -22.4            | -855.5861724  | -2648.1694763 | -3094.6741150 | -409.0900593      | 0.0 | 0.0 | 0.0  | 0.0 |
|        |    |    |    | mol6            | TMPZnCl  | 3_ZnCl_d3_mol6_aap        | TMPH_1 |                             | -22.4            | -855.5861724  | -2648.1694763 | -3094.6741137 | -409.0900593      | 0.0 | 0.0 | 0.0  | 0.0 |
|        |    |    |    | mol6            | TMPZnCl  | 5_ZnCl_d5_mol6_aae        | TMPH_1 |                             | -19.7            | -855.5861724  | -2648.1694763 | -3094.6731069 | -409.0900593      | 0.0 | 0.0 | 2.7  | 0.0 |
|        |    |    |    | mol6            | TMPZnCl  | 8_ZnCl_d8_mol6_aac        | TMPH_1 |                             | -6.1             | -855.5861724  | -2648.1694763 | -3094.6679257 | -409.0900593      | 0.0 | 0.0 | 16.3 | 0.0 |
|        |    |    |    | mol6            | TMPZnCl  | 2_ZnCl_d2_mol6_aaq        | TMPH_1 |                             | -2.2             | -855.5861724  | -2648.1694763 | -3094.6664208 | -409.0900593      | 0.0 | 0.0 | 20.2 | 0.0 |
|        |    |    |    | mol6            | TMP2Zn_1 | 5_TMPZn_d5_mol6_b         | TMPH_1 |                             | -17.0            | -855.5861724  | -2596.3552027 | -3042.8577834 | -409.0900593      | 0.0 | 0.0 | 0.0  | 0.0 |
|        |    |    |    | mol6            | TMP2Zn_1 | 5_TMPZn_d5_mol6_a         | TMPH_1 |                             | -16.4            | -855.5861724  | -2596.3552027 | -3042.8575458 | -409.0900593      | 0.0 | 0.0 | 0.6  | 0.0 |
|        |    |    |    | mol6            | TMP2Zn_1 | 3_TMPZn_d3_mol6_b         | TMPH_1 |                             | -13.4            | -855.5861724  | -2596.3552027 | -3042.8564139 | -409.0900593      | 0.0 | 0.0 | 3.6  | 0.0 |
|        |    |    |    | mol6            | TMP2Zn_1 | 8_TMPZn_d8_mol6_a         | TMPH_1 |                             | 5.5              | -855.5861724  | -2596.3552027 | -3042.8492399 | -409.0900593      | 0.0 | 0.0 | 22.4 | 0.0 |
|        |    |    |    | mol6            | TMP2Zn_1 | 2_TMPZn_d2_mol6_a         | TMPH_1 |                             | 11.0             | -855.5861724  | -2596.3552027 | -3042.8471394 | -409.0900593      | 0.0 | 0.0 | 27.9 | 0.0 |
|        |    |    |    | mol6            | TMP2Zn_1 | mol14_pos5                | TMPH_1 |                             | -35.0            | -855.5861724  | -2596.3552027 | -3489.3607760 | -409.0900593      | 0.0 | 0.0 | 0.0  | 0.0 |
|        |    |    |    | mol6            | TMP2Zn_1 | mol14_pos3                | TMPH_1 |                             | -33.0            | -855.5861724  | -2596.3552027 | -3489.3599842 | -409.0900593      | 0.0 | 0.0 | 2.1  | 0.0 |
|        |    |    |    | mol6            | TMP2Zn_1 | mol14_pos8                | TMPH_1 |                             | 1.0              | -855.5861724  | -2596.3552027 | -3489.3470408 | -409.0900593      | 0.0 | 0.0 | 36.1 | 0.0 |
|        |    |    |    | mol6            | TMP2Zn_1 | mol14_pos2                | TMPH_1 |                             | 9.7              | -855.5861724  | -2596.3552027 | -3489.3437163 | -409.0900593      | 0.0 | 0.0 | 44.8 | 0.0 |
|        |    |    |    | mol7e           | TMPZnCl  | 5_ZnCl_d5_mol7e           | TMPH_1 |                             | -18.0            | -947.8629812  | -2648.1694763 | -3186.9492594 | -409.0900593      | 0.0 | 0.0 | 0.0  | 0.0 |
|        |    |    |    | mol7e           | TMPZnCl  | 2_ZnCl_d2_mol7e           | TMPH_1 |                             | -13.1            | -947.8629812  | -2648.1694763 | -3186.9473775 | -409.0900593      | 0.0 | 0.0 | 4.9  | 0.0 |
|        |    |    |    | mol7e           | TMPZnCl  | 8_ZnCl_d8_mol7e           | TMPH_1 |                             | -10.9            | -947.8629812  | -2648.1694763 | -3186.9465540 | -409.0900593      | 0.0 | 0.0 | 7.1  | 0.0 |
|        |    |    |    | mol7e           | TMP2Zn_1 | 5_TMPZn_d5_mol7e_36       | TMPH_1 |                             | -15.1            | -947.8629812  | -2596.3552027 | -3135.1338599 | -409.0900593      | 0.0 | 0.0 | 0.0  | 0.0 |
|        |    |    |    | mol7e           | TMP2Zn_1 | 5_TMPZn_d5_mol7e          | TMPH_1 |                             | -15.1            | -947.8629812  | -2596.3552027 | -3135.1338594 | -409.0900593      | 0.0 | 0.0 | 0.0  | 0.0 |
|        |    |    |    | mol7e           | TMP2Zn_1 | 5_TMPZn_d5_mol7e_40       | TMPH_1 |                             | -4.1             | -947.8629812  | -2596.3552027 | -3135.1296812 | -409.0900593      | 0.0 | 0.0 | 11.0 | 0.0 |
|        |    |    |    | mol7e           | TMP2Zn_1 | 2_TMPZn_d2_mol7e          | TMPH_1 |                             | -3.5             | -947.8629812  | -2596.3552027 | -3135.1294474 | -409.0900593      | 0.0 | 0.0 | 11.6 | 0.0 |
|        |    |    |    | mol7e           | TMP2Zn_1 | 8_TMPZn_d8_mol7e          | TMPH_1 |                             | -1.1             | -947.8629812  | -2596.3552027 | -3135.1285383 | -409.0900593      | 0.0 | 0.0 | 14.0 | 0.0 |
|        |    |    |    | mol7e           | TMP2Zn_1 | 5_TMPZn_d5_mol7e_38       | TMPH_1 |                             | 0.8              | -947.8629812  | -2596.3552027 | -3135.1278052 | -409.0900593      | 0.0 | 0.0 | 15.9 | 0.0 |
|        |    |    |    | mol7e           | TMP2Zn_1 | 5_TMPZn_d5_mol7e_1        | TMPH_1 |                             | 3.3              | -947.8629812  | -2596.3552027 | -3135.1268724 | -409.0900593      | 0.0 | 0.0 | 18.3 | 0.0 |
|        |    |    |    | mol7e           | TMP2Zn_1 | mol15_pos5                | TMPH_1 |                             | -31.7            | -947.8629812  | -2596.3552027 | -3673.9131114 | -409.0900593      | 0.0 | 0.0 | 0.0  | 0.0 |
|        |    |    |    | mol7e           | TMP2Zn_1 | mol15_pos2                | TMPH_1 |                             | -16.2            | -947.8629812  | -2596.3552027 | -3673.9072223 | -409.0900593      | 0.0 | 0.0 | 15.5 | 0.0 |
|        |    |    |    | mol7e           | TMP2Zn_1 | mol15_pos8                | TMPH_1 |                             | -10.9            | -947.8629812  | -2596.3552027 | -3673.9051836 | -409.0900593      | 0.0 | 0.0 | 20.8 | 0.0 |
|        |    |    |    | mol16e_2        | TMPMgCl  | mol17_pos5_2              | TMPH_1 |                             | -10.3            | -1293.4686930 | -1068.9619145 | -1953.3472864 | -409.0872280      | 0.0 | 0.0 | 0.0  | 0.0 |
|        |    |    |    | mol16e_2        | TMPMgCl  | mol17_pos5_1              | TMPH_1 |                             | -10.2            | -1293.4686930 | -1068.9619145 | -1953.3472537 | -409.0872280      | 0.0 | 0.0 | 0.1  | 0.0 |
|        |    |    |    | mol16e_2        | TMPMgCl  | mol17_pos8_2              | TMPH_1 |                             | 18.2             | -1293.4686930 | -1068.9619145 | -1953.3364555 | -409.0872280      | 0.0 | 0.0 | 28.4 | 0.0 |
| 0      | 0  | 0  | 0  | 1_LiCl_mol6_1   | TMPMgCl  | 1_LiCl_8MgCl_d8_mol6      | TMPH_1 | reaction11                  | -41.5            | -1323.4935028 | -1068.9586982 | -1983.3835061 | -409.0844975      | 0.0 | 0.0 | 0.0  | 0.0 |
| 0      | 0  | 0  | 0  | 1_LiCl_mol6_1   | TMPZnCl  | 1_LiCl_8ZnCl_d8_mol6_aac  | TMPH_1 | reaction12                  | -28.6            | -1323.4994551 | -2648.1694763 | -3562.5897820 | -409.0900593      | 0.0 | 0.0 | 0.0  | 0.0 |
| 0      | 0  | 0  | 0  | 1_LiCl_mol6_1   | TMP2Zn_1 | 1_LiCl_5TMPZn_d5_mol6_a   | TMPH_1 | reaction13                  | -17.4            | -1323.4994551 | -2596.3552027 | -3510.7712236 | -409.0900593      | 0.0 | 0.0 | 0.0  | 0.0 |
| 0      | 0  | 0  | 0  | 1_LiCl_mol6_1   | TMP2Zn_1 | 1_LiCl_mol14_pos3         | TMPH_1 | reaction14                  | -39.1            | -1323.4994551 | -2596.3552027 | -4425.1888853 | -409.0900593      | 0.0 | 0.0 | 0.0  | 0.0 |
| 0      | 0  | 0  | 0  | 1_LiCl_mol7e    | TMPZnCl  | 1_LiCl_2_ZnCl_d2_mol7e    | TMPH_1 | reaction15                  | -44.2            | -1415.7740903 | -2648.1694763 | -3654.8703328 | -409.0900593      | 0.0 | 0.0 | 0.0  | 0.0 |
| 0      | 0  | 0  | 0  | 1_LiCl_mol7e    | TMP2Zn_1 | 1_LiCl_5TMPZn_d5_mol7e_36 | TMPH_1 | reaction16                  | -17.4            | -1415.7740903 | -2596.3552027 | -3603.0458426 | -409.0900593      | 0.0 | 0.0 | 0.0  | 0.0 |
| 0      | 0  | 0  | 0  | 1_LiCl_mol7e    | TMP2Zn_1 | 1_LiCl_mol15_pos2_15      | TMPH_1 | reaction17                  | -65.5            | -1415.7740903 | -2596.3552027 | -4609.7481992 | -409.0900593      | 0.0 | 0.0 | 0.0  | 0.0 |
| 0      | 0  | 0  | 0  | 1_LiCl_mol16e_2 | TMPMgCl  | 1_LiCl_mol17_pos8_2       | TMPH_1 | reaction18                  | -55.1            | -1761.3767786 | -1068.9619145 | -2421.2724629 | -409.0872280      | 0.0 | 0.0 | 0.0  | 0.0 |
|        |    |    |    | 1_LiCl_mol6_1   | TMPMgCl  | 1_LiCl_8MgCl_d8_mol6      | TMPH_1 |                             | -41.5            | -1323.4935028 | -1068.9586982 | -1983.3835061 | -409.0844975      | 0.0 | 0.0 | 0.0  | 0.0 |
|        |    |    |    | 1_LiCl_mol6_1   | TMPMgCl  | 1_LiCl_3MgCl_d3_mol6      | TMPH_1 |                             | -17.3            | -1323.4935028 | -1068.9586982 | -1983.3742927 | -409.0844975      | 0.0 | 0.0 | 24.2 | 0.0 |
|        |    |    |    | 1_LiCl_mol6_1   | TMPMgCl  | 1_LiCl_5MgCl_d5_mol6      | TMPH_1 |                             | 4.8              | -1323.4935028 | -1068.9586982 | -1983.3658756 | -409.0844975      | 0.0 | 0.0 | 46.3 | 0.0 |

|   |   |   |   |                 |          |                           |        |            |       |               |               |               |              |     |     |      |     |
|---|---|---|---|-----------------|----------|---------------------------|--------|------------|-------|---------------|---------------|---------------|--------------|-----|-----|------|-----|
|   |   |   |   | 1_LiCl_mol6_1   | TMPMgCl  | 1_LiCl_2MgCl_d2_mol6      | TMPH_1 |            | 8.4   | -1323.4935028 | -1068.9586982 | -1983.3645050 | -409.0844975 | 0.0 | 0.0 | 49.9 | 0.0 |
|   |   |   |   | 1_LiCl_mol6_1   | TMPZnCl  | 1_LiCl_8ZnCl_d8_mol6_aac  | TMPH_1 |            | -28.6 | -1323.4994551 | -2648.1694763 | -3562.5897820 | -409.0900593 | 0.0 | 0.0 | 0.0  | 0.0 |
|   |   |   |   | 1_LiCl_mol6_1   | TMPZnCl  | 1_LiCl_2ZnCl_d2_mol6_aaq  | TMPH_1 |            | -28.1 | -1323.4994551 | -2648.1694763 | -3562.5895922 | -409.0900593 | 0.0 | 0.0 | 0.5  | 0.0 |
|   |   |   |   | 1_LiCl_mol6_1   | TMPZnCl  | 1_LiCl_3ZnCl_d3_mol6_aap  | TMPH_1 |            | -25.4 | -1323.4994551 | -2648.1694763 | -3562.5885429 | -409.0900593 | 0.0 | 0.0 | 3.3  | 0.0 |
|   |   |   |   | 1_LiCl_mol6_1   | TMPZnCl  | 1_LiCl_5ZnCl_d5_mol6_aae  | TMPH_1 |            | -2.0  | -1323.4994551 | -2648.1694763 | -3562.5796205 | -409.0900593 | 0.0 | 0.0 | 26.7 | 0.0 |
|   |   |   |   | 1_LiCl_mol6_1   | TMP2Zn_1 | 1_LiCl_5TMPZn_d5_mol6_a   | TMPH_1 |            | -17.4 | -1323.4994551 | -2596.3552027 | -3510.7712236 | -409.0900593 | 0.0 | 0.0 | 0.0  | 0.0 |
|   |   |   |   | 1_LiCl_mol6_1   | TMP2Zn_1 | 1_LiCl_5TMPZn_d5_mol6_b   | TMPH_1 |            | -15.6 | -1323.4994551 | -2596.3552027 | -3510.7705445 | -409.0900593 | 0.0 | 0.0 | 1.8  | 0.0 |
|   |   |   |   | 1_LiCl_mol6_1   | TMP2Zn_1 | 1_LiCl_3TMPZn_d3_mol6_a   | TMPH_1 |            | -14.3 | -1323.4994551 | -2596.3552027 | -3510.7700601 | -409.0900593 | 0.0 | 0.0 | 3.1  | 0.0 |
|   |   |   |   | 1_LiCl_mol6_1   | TMP2Zn_1 | 1_LiCl_3TMPZn_d3_mol6_b   | TMPH_1 |            | -13.8 | -1323.4994551 | -2596.3552027 | -3510.7698440 | -409.0900593 | 0.0 | 0.0 | 3.6  | 0.0 |
|   |   |   |   | 1_LiCl_mol6_1   | TMP2Zn_1 | 1_LiCl_2TMPZn_d2_mol6_c   | TMPH_1 |            | -2.5  | -1323.4994551 | -2596.3552027 | -3510.7655469 | -409.0900593 | 0.0 | 0.0 | 14.9 | 0.0 |
|   |   |   |   | 1_LiCl_mol6_1   | TMP2Zn_1 | 1_LiCl_8TMPZn_d8_mol6_c   | TMPH_1 |            | 5.9   | -1323.4994551 | -2596.3552027 | -3510.7623611 | -409.0900593 | 0.0 | 0.0 | 23.3 | 0.0 |
|   |   |   |   | 1_LiCl_mol6_1   | TMP2Zn_1 | 1_LiCl_mol14_pos3         | TMPH_1 |            | -39.1 | -1323.4994551 | -2596.3552027 | -4425.1888853 | -409.0900593 | 0.0 | 0.0 | 0.0  | 0.0 |
|   |   |   |   | 1_LiCl_mol6_1   | TMP2Zn_1 | 1_LiCl_mol14_pos2_5       | TMPH_1 |            | -34.7 | -1323.4994551 | -2596.3552027 | -4425.1872003 | -409.0900593 | 0.0 | 0.0 | 4.4  | 0.0 |
|   |   |   |   | 1_LiCl_mol6_1   | TMP2Zn_1 | 1_LiCl_mol14_pos5         | TMPH_1 |            | -34.4 | -1323.4994551 | -2596.3552027 | -4425.1871093 | -409.0900593 | 0.0 | 0.0 | 4.7  | 0.0 |
|   |   |   |   | 1_LiCl_mol6_1   | TMP2Zn_1 | 1_LiCl_mol14_pos8         | TMPH_1 |            | -31.2 | -1323.4994551 | -2596.3552027 | -4425.1858786 | -409.0900593 | 0.0 | 0.0 | 7.9  | 0.0 |
|   |   |   |   | 1_LiCl_mol7e    | TMPZnCl  | 1_LiCl_2_ZnCl_d2_mol7e    | TMPH_1 |            | -44.2 | -1415.7740903 | -2648.1694763 | -3654.8703328 | -409.0900593 | 0.0 | 0.0 | 0.0  | 0.0 |
|   |   |   |   | 1_LiCl_mol7e    | TMPZnCl  | 1_LiCl_8_ZnCl_d8_mol7e    | TMPH_1 |            | -34.2 | -1415.7740903 | -2648.1694763 | -3654.8665198 | -409.0900593 | 0.0 | 0.0 | 10.0 | 0.0 |
|   |   |   |   | 1_LiCl_mol7e    | TMPZnCl  | 1_LiCl_5_ZnCl_d5_mol7e    | TMPH_1 |            | -19.6 | -1415.7740903 | -2648.1694763 | -3654.8609807 | -409.0900593 | 0.0 | 0.0 | 24.6 | 0.0 |
|   |   |   |   | 1_LiCl_mol7e    | TMP2Zn_1 | 1_LiCl_5TMPZn_d5_mol7e_36 | TMPH_1 |            | -17.4 | -1415.7740903 | -2596.3552027 | -3603.0458426 | -409.0900593 | 0.0 | 0.0 | 0.0  | 0.0 |
|   |   |   |   | 1_LiCl_mol7e    | TMP2Zn_1 | 1_LiCl_5TMPZn_d5_mol7e    | TMPH_1 |            | -16.9 | -1415.7740903 | -2596.3552027 | -3603.0456760 | -409.0900593 | 0.0 | 0.0 | 0.4  | 0.0 |
|   |   |   |   | 1_LiCl_mol7e    | TMP2Zn_1 | 1_LiCl_2TMPZn_d2_mol7e    | TMPH_1 |            | -12.5 | -1415.7740903 | -2596.3552027 | -3603.0439831 | -409.0900593 | 0.0 | 0.0 | 4.9  | 0.0 |
|   |   |   |   | 1_LiCl_mol7e    | TMP2Zn_1 | 1_LiCl_5TMPZn_d5_mol7e_40 | TMPH_1 |            | -5.0  | -1415.7740903 | -2596.3552027 | -3603.0411553 | -409.0900593 | 0.0 | 0.0 | 12.3 | 0.0 |
|   |   |   |   | 1_LiCl_mol7e    | TMP2Zn_1 | 1_LiCl_2TMPZn_d2_mol7e_31 | TMPH_1 |            | -5.0  | -1415.7740903 | -2596.3552027 | -3603.0411461 | -409.0900593 | 0.0 | 0.0 | 12.3 | 0.0 |
|   |   |   |   | 1_LiCl_mol7e    | TMP2Zn_1 | 1_LiCl_2TMPZn_d2_mol7e_26 | TMPH_1 |            | -4.9  | -1415.7740903 | -2596.3552027 | -3603.0410879 | -409.0900593 | 0.0 | 0.0 | 12.5 | 0.0 |
|   |   |   |   | 1_LiCl_mol7e    | TMP2Zn_1 | 1_LiCl_2TMPZn_d2_mol7e_28 | TMPH_1 |            | -1.5  | -1415.7740903 | -2596.3552027 | -3603.0398050 | -409.0900593 | 0.0 | 0.0 | 15.9 | 0.0 |
|   |   |   |   | 1_LiCl_mol7e    | TMP2Zn_1 | 1_LiCl_5TMPZn_d5_mol7e_38 | TMPH_1 |            | -0.3  | -1415.7740903 | -2596.3552027 | -3603.0393374 | -409.0900593 | 0.0 | 0.0 | 17.1 | 0.0 |
|   |   |   |   | 1_LiCl_mol7e    | TMP2Zn_1 | 1_LiCl_5TMPZn_d5_mol7e_1  | TMPH_1 |            | 0.4   | -1415.7740903 | -2596.3552027 | -3603.0390970 | -409.0900593 | 0.0 | 0.0 | 17.7 | 0.0 |
|   |   |   |   | 1_LiCl_mol7e    | TMP2Zn_1 | 1_LiCl_8TMPZn_d8_mol7e_20 | TMPH_1 |            | 5.8   | -1415.7740903 | -2596.3552027 | -3603.0370168 | -409.0900593 | 0.0 | 0.0 | 23.2 | 0.0 |
|   |   |   |   | 1_LiCl_mol7e    | TMP2Zn_1 | 1_LiCl_mol15_pos2_15      | TMPH_1 |            | -65.5 | -1415.7740903 | -2596.3552027 | -4609.7481992 | -409.0900593 | 0.0 | 0.0 | 0.0  | 0.0 |
|   |   |   |   | 1_LiCl_mol7e    | TMP2Zn_1 | 1_LiCl_mol15_pos8_19      | TMPH_1 |            | -64.1 | -1415.7740903 | -2596.3552027 | -4609.7476731 | -409.0900593 | 0.0 | 0.0 | 1.4  | 0.0 |
|   |   |   |   | 1_LiCl_mol7e    | TMP2Zn_1 | 1_LiCl_mol15_pos2_17      | TMPH_1 |            | -55.9 | -1415.7740903 | -2596.3552027 | -4609.7445580 | -409.0900593 | 0.0 | 0.0 | 9.6  | 0.0 |
|   |   |   |   | 1_LiCl_mol7e    | TMP2Zn_1 | 1_LiCl_mol15_pos2_13      | TMPH_1 |            | -46.5 | -1415.7740903 | -2596.3552027 | -4609.7409713 | -409.0900593 | 0.0 | 0.0 | 19.0 | 0.0 |
|   |   |   |   | 1_LiCl_mol7e    | TMP2Zn_1 | 1_LiCl_mol15_pos8         | TMPH_1 |            | -46.3 | -1415.7740903 | -2596.3552027 | -4609.7408805 | -409.0900593 | 0.0 | 0.0 | 19.2 | 0.0 |
|   |   |   |   | 1_LiCl_mol7e    | TMP2Zn_1 | 1_LiCl_mol15_pos2_12      | TMPH_1 |            | -42.3 | -1415.7740903 | -2596.3552027 | -4609.7393718 | -409.0900593 | 0.0 | 0.0 | 23.2 | 0.0 |
|   |   |   |   | 1_LiCl_mol7e    | TMP2Zn_1 | 1_LiCl_mol15_pos5         | TMPH_1 |            | -34.0 | -1415.7740903 | -2596.3552027 | -4609.7361996 | -409.0900593 | 0.0 | 0.0 | 31.5 | 0.0 |
|   |   |   |   | 1_LiCl_mol16e_2 | TMPMgCl  | 1_LiCl_mol17_pos8_2       | TMPH_1 |            | -55.1 | -1761.3767786 | -1068.9619145 | -2421.2724629 | -409.0872280 | 0.0 | 0.0 | 0.0  | 0.0 |
|   |   |   |   | 1_LiCl_mol16e_2 | TMPMgCl  | 1_LiCl_mol17_pos8_1       | TMPH_1 |            | -54.8 | -1761.3767786 | -1068.9619145 | -2421.2723452 | -409.0872280 | 0.0 | 0.0 | 0.3  | 0.0 |
|   |   |   |   | 1_LiCl_mol16e_2 | TMPMgCl  | 1_LiCl_mol17_pos5_1       | TMPH_1 |            | -14.8 | -1761.3767786 | -1068.9619145 | -2421.2570899 | -409.0872280 | 0.0 | 0.0 | 40.4 | 0.0 |
| 0 | 0 | 0 | 0 | LiCl_mol6_aan   | TMPMgCl  | MgClLiCl_d5_mol6          | TMPH_1 | reaction21 | -45.2 | -1323.4932725 | -1068.9586982 | -1983.3846802 | -409.0844975 | 0.0 | 0.0 | 0.0  | 0.0 |
| 0 | 0 | 0 | 0 | LiCl_mol6_aan   | TMPZnCl  | LiCl_8ZnCl_d8_mol6_aac2   | TMPH_1 | reaction22 | -30.9 | -1323.4992246 | -2648.1694763 | -3562.5904045 | -409.0900593 | 0.0 | 0.0 | 0.0  | 0.0 |
| 0 | 0 | 0 | 0 | LiCl_mol6_aan   | TMP2Zn_1 | LiCl_3TMPZn_d3_mol6_a     | TMPH_1 | reaction23 | -21.4 | -1323.4992246 | -2596.3552027 | -3510.7725271 | -409.0900593 | 0.0 | 0.0 | 0.0  | 0.0 |
| 0 | 0 | 0 | 0 | LiCl_mol6_aan   | TMP2Zn_1 | LiCl_mol14_pos8_38        | TMPH_1 | reaction24 | -52.9 | -1323.4992246 | -2596.3552027 | -4425.1936667 | -409.0900593 | 0.0 | 0.0 | 0.0  | 0.0 |
| 0 | 0 | 0 | 0 | 1_LiCl_mol7e    | TMPZnCl  | 1_LiCl_2_ZnCl_d2_mol7e    | TMPH_1 | reaction25 | -44.2 | -1415.7740903 | -2648.1694763 | -3654.8703328 | -409.0900593 | 0.0 | 0.0 | 0.0  | 0.0 |
| 0 | 0 | 0 | 0 | 1_LiCl_mol7e    | TMP2Zn_1 | 1_LiCl_5TMPZn_d5_mol7e_36 | TMPH_1 | reaction26 | -17.4 | -1415.7740903 | -2596.3552027 | -3603.0458426 | -409.0900593 | 0.0 | 0.0 | 0.0  | 0.0 |
| 0 | 0 | 0 | 0 | 1_LiCl_mol7e    | TMP2Zn_1 | 1_LiCl_mol15_pos2_15      | TMPH_1 | reaction27 | -65.5 | -1415.7740903 | -2596.3552027 | -4609.7481992 | -409.0900593 | 0.0 | 0.0 | 0.0  | 0.0 |
| 0 | 0 | 0 | 0 | 1_LiCl_mol16e_2 | TMPMgCl  | LiCl_mol17_pos8_2         | TMPH_1 | reaction28 | -62.3 | -1761.3767786 | -1068.9619145 | -2421.2751881 | -409.0872280 | 0.0 | 0.0 | 0.0  | 0.0 |
|   |   |   |   | LiCl_mol6_aan   | TMPMgCl  | MgClLiCl_d5_mol6          | TMPH_1 |            | -45.2 | -1323.4932725 | -1068.9586982 | -1983.3846802 | -409.0844975 | 0.0 | 0.0 | 0.0  | 0.0 |
|   |   |   |   | LiCl_mol6_aan   | TMPMgCl  | 1_LiCl_8MgCl_d8_mol6      | TMPH_1 |            | -42.1 | -1323.4932725 | -1068.9586982 | -1983.3835061 | -409.0844975 | 0.0 | 0.0 | 3.1  | 0.0 |
|   |   |   |   | LiCl_mol6_aan   | TMPMgCl  | MgClLiCl_d3_mol6          | TMPH_1 |            | -41.0 | -1323.4932725 | -1068.9586982 | -1983.3830947 | -409.0844975 | 0.0 | 0.0 | 4.2  | 0.0 |
|   |   |   |   | LiCl_mol6_aan   | TMPMgCl  | MgClLiCl_d5_mol6_1        | TMPH_1 |            | -26.4 | -1323.4932725 | -1068.9586982 | -1983.3775462 | -409.0844975 | 0.0 | 0.0 | 18.7 | 0.0 |
|   |   |   |   | LiCl_mol6_aan   | TMPMgCl  | MgClLiCl_d8_mol6_1        | TMPH_1 |            | -18.3 | -1323.4932725 | -1068.9586982 | -1983.3744618 | -409.0844975 | 0.0 | 0.0 | 26.8 | 0.0 |
|   |   |   |   | LiCl_mol6_aan   | TMPMgCl  | 1_LiCl_3MgCl_d3_mol6      | TMPH_1 |            | -17.9 | -1323.4932725 | -1068.9586982 | -1983.3742927 | -409.0844975 | 0.0 | 0.0 | 27.3 | 0.0 |
|   |   |   |   | LiCl_mol6_aan   | TMPMgCl  | MgClLiCl_d8_mol6          | TMPH_1 |            | -5.3  | -1323.4932725 | -1068.9586982 | -1983.3695024 | -409.0844975 | 0.0 | 0.0 | 39.8 | 0.0 |
|   |   |   |   | LiCl_mol6_aan   | TMPMgCl  | 1_LiCl_5MgCl_d5_mol6      | TMPH_1 |            | 4.2   | -1323.4932725 | -1068.9586982 | -1983.3658756 | -409.0844975 | 0.0 | 0.0 | 49.4 | 0.0 |
|   |   |   |   | LiCl_mol6_aan   | TMPMgCl  | 1_LiCl_2MgCl_d2_mol6      | TMPH_1 |            | 7.8   | -1323.4932725 | -1068.9586982 | -1983.3645050 | -409.0844975 | 0.0 | 0.0 | 53.0 | 0.0 |
|   |   |   |   | LiCl_mol6_aan   | TMPZnCl  | LiCl_8ZnCl_d8_mol6_aac2   | TMPH_1 |            | -30.9 | -1323.4992246 | -2648.1694763 | -3562.5904045 | -409.0900593 | 0.0 | 0.0 | 0.0  | 0.0 |
|   |   |   |   | LiCl_mol6_aan   | TMPZnCl  | 1_LiCl_8ZnCl_d8_mol6_aac  | TMPH_1 |            | -29.2 | -1323.4992246 | -2648.1694763 | -3562.5897820 | -409.0900593 | 0.0 | 0.0 | 1.6  | 0.0 |
|   |   |   |   | LiCl_mol6_aan   | TMPZnCl  | LiCl_5ZnCl_d5_mol6_aae    | TMPH_1 |            | -29.2 | -1323.4992246 | -2648.1694763 | -3562.5897455 | -409.0900593 | 0.0 | 0.0 | 1.7  | 0.0 |
|   |   |   |   | LiCl_mol6_aan   | TMPZnCl  | 1_LiCl_2ZnCl_d2_mol6_aaq  | TMPH_1 |            | -28.8 | -1323.4992246 | -2648.1694763 | -3562.5895922 | -409.0900593 | 0.0 | 0.0 | 2.1  | 0.0 |
|   |   |   |   | LiCl_mol6_aan   | TMPZnCl  | LiCl_3ZnCl_d3_mol6_aap    | TMPH_1 |            | -28.5 | -1323.4992246 | -2648.1694763 | -3562.5894870 | -409.0900593 | 0.0 | 0.0 | 2.4  | 0.0 |



|  |  |  |  |                |          |                           |        |  |  |       |               |               |               |              |     |     |       |     |
|--|--|--|--|----------------|----------|---------------------------|--------|--|--|-------|---------------|---------------|---------------|--------------|-----|-----|-------|-----|
|  |  |  |  | MgCl2_mol6_aac | TMP2Zn_1 | 1_MgCl2_5TMPZn_d5_mol6_a  | TMPH_1 |  |  | -18.8 | -1976.3964261 | -2596.3552027 | -4163.6687193 | -409.0900593 | 0.0 | 0.0 | 0.7   | 0.0 |
|  |  |  |  | MgCl2_mol6_aac | TMP2Zn_1 | 1_MgCl2_3TMPZn_d3_mol6_a  | TMPH_1 |  |  | -18.4 | -1976.3964261 | -2596.3552027 | -4163.6685758 | -409.0900593 | 0.0 | 0.0 | 1.1   | 0.0 |
|  |  |  |  | MgCl2_mol6_aac | TMP2Zn_1 | 1_MgCl2_3TMPZn_d3_mol6_b  | TMPH_1 |  |  | -17.9 | -1976.3964261 | -2596.3552027 | -4163.6683746 | -409.0900593 | 0.0 | 0.0 | 1.6   | 0.0 |
|  |  |  |  | MgCl2_mol6_aac | TMP2Zn_1 | MgCl2_3TMPZn_d3_mol6_a    | TMPH_1 |  |  | -5.1  | -1976.3964261 | -2596.3552027 | -4163.6634983 | -409.0900593 | 0.0 | 0.0 | 14.4  | 0.0 |
|  |  |  |  | MgCl2_mol6_aac | TMP2Zn_1 | 1_MgCl2_2TMPZn_d2_mol6_c  | TMPH_1 |  |  | -0.6  | -1976.3964261 | -2596.3552027 | -4163.6617870 | -409.0900593 | 0.0 | 0.0 | 18.9  | 0.0 |
|  |  |  |  | MgCl2_mol6_aac | TMP2Zn_1 | MgCl2_5TMPZn_d5_mol6_aa   | TMPH_1 |  |  | -0.4  | -1976.3964261 | -2596.3552027 | -4163.6617381 | -409.0900593 | 0.0 | 0.0 | 19.0  | 0.0 |
|  |  |  |  | MgCl2_mol6_aac | TMP2Zn_1 | 1_MgCl2_2TMPZn_d2_mol6_b  | TMPH_1 |  |  | 8.5   | -1976.3964261 | -2596.3552027 | -4163.6583396 | -409.0900593 | 0.0 | 0.0 | 27.9  | 0.0 |
|  |  |  |  | MgCl2_mol6_aac | TMP2Zn_1 | 1_MgCl2_8TMPZn_d8_mol6_a2 | TMPH_1 |  |  | 13.1  | -1976.3964261 | -2596.3552027 | -4163.6565679 | -409.0900593 | 0.0 | 0.0 | 32.6  | 0.0 |
|  |  |  |  | MgCl2_mol6_aac | TMP2Zn_1 | 1_MgCl2_mol14_pos3        | TMPH_1 |  |  | -45.0 | -1976.3964261 | -2596.3552027 | -5730.9850649 | -409.0900593 | 0.0 | 0.0 | 0.0   | 0.0 |
|  |  |  |  | MgCl2_mol6_aac | TMP2Zn_1 | 1_MgCl2_mol14_pos2_27     | TMPH_1 |  |  | -43.3 | -1976.3964261 | -2596.3552027 | -5730.9844212 | -409.0900593 | 0.0 | 0.0 | 1.7   | 0.0 |
|  |  |  |  | MgCl2_mol6_aac | TMP2Zn_1 | 1_MgCl2_mol14_pos5        | TMPH_1 |  |  | -39.0 | -1976.3964261 | -2596.3552027 | -5730.9827748 | -409.0900593 | 0.0 | 0.0 | 6.0   | 0.0 |
|  |  |  |  | MgCl2_mol6_aac | TMP2Zn_1 | 1_MgCl2_mol14_pos2        | TMPH_1 |  |  | -16.7 | -1976.3964261 | -2596.3552027 | -5730.9743038 | -409.0900593 | 0.0 | 0.0 | 28.3  | 0.0 |
|  |  |  |  | MgCl2_mol6_aac | TMP2Zn_1 | 1_MgCl2_mol14_pos5_29     | TMPH_1 |  |  | -7.7  | -1976.3964261 | -2596.3552027 | -5730.9708620 | -409.0900593 | 0.0 | 0.0 | 37.3  | 0.0 |
|  |  |  |  | MgCl2_mol6_aac | TMP2Zn_1 | 1_MgCl2_mol14_pos5_31     | TMPH_1 |  |  | 7.6   | -1976.3964261 | -2596.3552027 | -5730.9650305 | -409.0900593 | 0.0 | 0.0 | 52.6  | 0.0 |
|  |  |  |  | MgCl2_mol6_aac | TMP2Zn_1 | 1_MgCl2_mol14_pos8        | TMPH_1 |  |  | 9.6   | -1976.3964261 | -2596.3552027 | -5730.9642970 | -409.0900593 | 0.0 | 0.0 | 54.5  | 0.0 |
|  |  |  |  | MgCl2_mol6_aac | TMP2Zn_1 | 1_MgCl2_mol14_pos8_1      | TMPH_1 |  |  | 15.9  | -1976.3964261 | -2596.3552027 | -5730.9618713 | -409.0900593 | 0.0 | 0.0 | 60.9  | 0.0 |
|  |  |  |  | 1_MgCl2_mol7e  | TMP2Zn_1 | 1_MgCl2_mol15_pos2_7      | TMPH_1 |  |  | -70.7 | -2068.6686058 | -2596.3552027 | -5915.5392259 | -409.0900593 | 0.0 | 0.0 | 0.0   | 0.0 |
|  |  |  |  | 1_MgCl2_mol7e  | TMP2Zn_1 | 1_MgCl2_mol15_pos2        | TMPH_1 |  |  | -55.9 | -2068.6686058 | -2596.3552027 | -5915.5335796 | -409.0900593 | 0.0 | 0.0 | 14.8  | 0.0 |
|  |  |  |  | 1_MgCl2_mol7e  | TMP2Zn_1 | 1_MgCl2_mol15_pos5        | TMPH_1 |  |  | -35.1 | -2068.6686058 | -2596.3552027 | -5915.5256702 | -409.0900593 | 0.0 | 0.0 | 35.6  | 0.0 |
|  |  |  |  | 1_MgCl2_mol7e  | TMP2Zn_1 | 1_MgCl2_mol15_pos2_9      | TMPH_1 |  |  | -7.2  | -2068.6686058 | -2596.3552027 | -5915.5150536 | -409.0900593 | 0.0 | 0.0 | 63.5  | 0.0 |
|  |  |  |  | 1_MgCl2_mol7e  | TMP2Zn_1 | 1_MgCl2_mol15_pos8        | TMPH_1 |  |  | 2.9   | -2068.6686058 | -2596.3552027 | -5915.5111726 | -409.0900593 | 0.0 | 0.0 | 73.7  | 0.0 |
|  |  |  |  | 1_MgCl2_mol7e  | TMP2Zn_1 | 1_MgCl2_mol15_pos2_5      | TMPH_1 |  |  | 17.4  | -2068.6686058 | -2596.3552027 | -5915.5056715 | -409.0900593 | 0.0 | 0.0 | 88.1  | 0.0 |
|  |  |  |  | 1_MgCl2_mol7e  | TMP2Zn_1 | 1_MgCl2_mol15_pos2_8      | TMPH_1 |  |  | 48.1  | -2068.6686058 | -2596.3552027 | -5915.4939915 | -409.0900593 | 0.0 | 0.0 | 118.8 | 0.0 |
|  |  |  |  | 1_MgCl2_mol7e  | TMP2Zn_1 | 1_MgCl2_mol15_pos5_10     | TMPH_1 |  |  | 82.6  | -2068.6686058 | -2596.3552027 | -5915.4808502 | -409.0900593 | 0.0 | 0.0 | 153.3 | 0.0 |

**Table TT12.** The calculated for reaction free energy values at the CPCM(THF)/B3LYP-D3/6-311++G(2df,2p)//B3LYP-D3/6-311++G(2d,p) level of theory (T = T<sub>experimental</sub>), "E1 and E2" – educt 1 and educt 2, "P1 and P2" – product 1 and product 2.

| charge |    |    |    | filename        |          |                           |        | $\Delta G^{tot}$<br>kJ/mol | $G^{tot}$ |               |               |               | $\Delta G^{tot}$ |     |     |      |     |
|--------|----|----|----|-----------------|----------|---------------------------|--------|----------------------------|-----------|---------------|---------------|---------------|------------------|-----|-----|------|-----|
| E1     | E2 | P1 | P2 | E1              | E2       | P1                        | P2     |                            | E1        | E2            | P1            | P2            | E1               | E2  | P1  | P2   |     |
| 0      | 0  | 0  | 0  | mol6            | TMPMgCl  | 3_MgCl_d3_mol6_aad        | TMPH_1 | reaction1                  | -1.5      | -855.5797856  | -1068.9540091 | -1515.4502223 | -409.0841431     | 0.0 | 0.0 | 0.0  | 0.0 |
| 0      | 0  | 0  | 0  | mol6            | TMPZnCl  | 3_ZnCl_d3_mol6_aac        | TMPH_1 | reaction2                  | -16.2     | -855.5847652  | -2648.1661160 | -3094.6673461 | -409.0897049     | 0.0 | 0.0 | 0.0  | 0.0 |
| 0      | 0  | 0  | 0  | mol6            | TMP2Zn_1 | 5_TMPZn_d5_mol6_a         | TMPH_1 | reaction3                  | -13.7     | -855.5847652  | -2596.3535754 | -3042.8538706 | -409.0897049     | 0.0 | 0.0 | 0.5  | 0.0 |
| 0      | 0  | 0  | 0  | mol6            | TMP2Zn_1 | mol14_pos5                | TMPH_1 | reaction4                  | -26.7     | -855.5847652  | -2596.3535754 | -3489.3538594 | -409.0897049     | 0.0 | 0.0 | 0.0  | 0.0 |
| 0      | 0  | 0  | 0  | mol7e           | TMPZnCl  | 5_ZnCl_d5_mol7e           | TMPH_1 | reaction5                  | -14.3     | -947.8613888  | -2648.1661160 | -3186.9432279 | -409.0897049     | 0.0 | 0.0 | 0.0  | 0.0 |
| 0      | 0  | 0  | 0  | mol7e           | TMP2Zn_1 | 5_TMPZn_d5_mol7e_36       | TMPH_1 | reaction6                  | -13.8     | -947.8613888  | -2596.3535754 | -3135.1305286 | -409.0897049     | 0.0 | 0.0 | 0.0  | 0.0 |
| 0      | 0  | 0  | 0  | mol7e           | TMP2Zn_1 | mol15_pos5                | TMPH_1 | reaction7                  | -29.2     | -947.8613888  | -2596.3535754 | -3673.9080747 | -409.0897049     | 0.0 | 0.0 | 0.0  | 0.0 |
| 0      | 0  | 0  | 0  | mol16e_1        | TMPMgCl  | mol17_pos5_2              | TMPH_1 | reaction8                  | -10.0     | -1293.4670033 | -1068.9572254 | -1953.3411666 | -409.0868736     | 0.5 | 0.0 | 0.0  | 0.0 |
|        |    |    |    | mol6            | TMPMgCl  | 3_MgCl_d3_mol6_aad        | TMPH_1 |                            | -1.5      | -855.5797856  | -1068.9540091 | -1515.4502223 | -409.0841431     | 0.0 | 0.0 | 0.0  | 0.0 |
|        |    |    |    | mol6            | TMPMgCl  | 3_MgCl_d3_mol6_aaq        | TMPH_1 |                            | -1.5      | -855.5797856  | -1068.9540091 | -1515.4502170 | -409.0841431     | 0.0 | 0.0 | 0.0  | 0.0 |
|        |    |    |    | mol6            | TMPMgCl  | 5_MgCl_d5_mol6_aaa        | TMPH_1 |                            | 10.0      | -855.5797856  | -1068.9540091 | -1515.4458470 | -409.0841431     | 0.0 | 0.0 | 11.5 | 0.0 |
|        |    |    |    | mol6            | TMPMgCl  | 8_MgCl_d8_mol6_aar        | TMPH_1 |                            | 19.6      | -855.5797856  | -1068.9540091 | -1515.4422009 | -409.0841431     | 0.0 | 0.0 | 21.1 | 0.0 |
|        |    |    |    | mol6            | TMPMgCl  | 2_MgCl_d2_mol6_aaa        | TMPH_1 |                            | 39.4      | -855.5797856  | -1068.9540091 | -1515.4346432 | -409.0841431     | 0.0 | 0.0 | 40.9 | 0.0 |
|        |    |    |    | mol6            | TMPZnCl  | 3_ZnCl_d3_mol6_aac        | TMPH_1 |                            | -16.2     | -855.5847652  | -2648.1661160 | -3094.6673461 | -409.0897049     | 0.0 | 0.0 | 0.0  | 0.0 |
|        |    |    |    | mol6            | TMPZnCl  | 3_ZnCl_d3_mol6_aax        | TMPH_1 |                            | -16.2     | -855.5847652  | -2648.1661160 | -3094.6673417 | -409.0897049     | 0.0 | 0.0 | 0.0  | 0.0 |
|        |    |    |    | mol6            | TMPZnCl  | 3_ZnCl_d3_mol6_aap        | TMPH_1 |                            | -16.2     | -855.5847652  | -2648.1661160 | -3094.6673407 | -409.0897049     | 0.0 | 0.0 | 0.0  | 0.0 |
|        |    |    |    | mol6            | TMPZnCl  | 5_ZnCl_d5_mol6_aae        | TMPH_1 |                            | -14.0     | -855.5847652  | -2648.1661160 | -3094.6664962 | -409.0897049     | 0.0 | 0.0 | 2.2  | 0.0 |
|        |    |    |    | mol6            | TMPZnCl  | 8_ZnCl_d8_mol6_aac        | TMPH_1 |                            | -2.8      | -855.5847652  | -2648.1661160 | -3094.6622318 | -409.0897049     | 0.0 | 0.0 | 13.4 | 0.0 |
|        |    |    |    | mol6            | TMPZnCl  | 2_ZnCl_d2_mol6_aaq        | TMPH_1 |                            | 1.8       | -855.5847652  | -2648.1661160 | -3094.6604824 | -409.0897049     | 0.0 | 0.0 | 18.0 | 0.0 |
|        |    |    |    | mol6            | TMP2Zn_1 | 5_TMPZn_d5_mol6_a         | TMPH_1 |                            | -13.3     | -855.5847652  | -2596.3535754 | -3042.8536920 | -409.0897049     | 0.0 | 0.0 | 0.5  | 0.0 |
|        |    |    |    | mol6            | TMP2Zn_1 | 5_TMPZn_d5_mol6_b         | TMPH_1 |                            | -13.7     | -855.5847652  | -2596.3535754 | -3042.8538706 | -409.0897049     | 0.0 | 0.0 | 0.0  | 0.0 |
|        |    |    |    | mol6            | TMP2Zn_1 | 3_TMPZn_d3_mol6_b         | TMPH_1 |                            | -10.2     | -855.5847652  | -2596.3535754 | -3042.8525100 | -409.0897049     | 0.0 | 0.0 | 3.6  | 0.0 |
|        |    |    |    | mol6            | TMP2Zn_1 | 8_TMPZn_d8_mol6_a         | TMPH_1 |                            | 6.3       | -855.5847652  | -2596.3535754 | -3042.8462379 | -409.0897049     | 0.0 | 0.0 | 20.0 | 0.0 |
|        |    |    |    | mol6            | TMP2Zn_1 | 2_TMPZn_d2_mol6_a         | TMPH_1 |                            | 12.5      | -855.5847652  | -2596.3535754 | -3042.8438617 | -409.0897049     | 0.0 | 0.0 | 26.3 | 0.0 |
|        |    |    |    | mol6            | TMP2Zn_1 | mol14_pos5                | TMPH_1 |                            | -26.7     | -855.5847652  | -2596.3535754 | -3489.3538594 | -409.0897049     | 0.0 | 0.0 | 0.0  | 0.0 |
|        |    |    |    | mol6            | TMP2Zn_1 | mol14_pos3                | TMPH_1 |                            | -23.1     | -855.5847652  | -2596.3535754 | -3489.3524997 | -409.0897049     | 0.0 | 0.0 | 3.6  | 0.0 |
|        |    |    |    | mol6            | TMP2Zn_1 | mol14_pos8                | TMPH_1 |                            | 5.5       | -855.5847652  | -2596.3535754 | -3489.3416096 | -409.0897049     | 0.0 | 0.0 | 32.2 | 0.0 |
|        |    |    |    | mol6            | TMP2Zn_1 | mol14_pos2                | TMPH_1 |                            | 14.9      | -855.5847652  | -2596.3535754 | -3489.3380114 | -409.0897049     | 0.0 | 0.0 | 41.6 | 0.0 |
|        |    |    |    | mol7e           | TMPZnCl  | 5_ZnCl_d5_mol7e           | TMPH_1 |                            | -14.3     | -947.8613888  | -2648.1661160 | -3186.9432279 | -409.0897049     | 0.0 | 0.0 | 0.0  | 0.0 |
|        |    |    |    | mol7e           | TMPZnCl  | 2_ZnCl_d2_mol7e           | TMPH_1 |                            | -7.7      | -947.8613888  | -2648.1661160 | -3186.9407477 | -409.0897049     | 0.0 | 0.0 | 6.5  | 0.0 |
|        |    |    |    | mol7e           | TMPZnCl  | 8_ZnCl_d8_mol7e           | TMPH_1 |                            | -6.2      | -947.8613888  | -2648.1661160 | -3186.9401746 | -409.0897049     | 0.0 | 0.0 | 8.0  | 0.0 |
|        |    |    |    | mol7e           | TMP2Zn_1 | 5_TMPZn_d5_mol7e_36       | TMPH_1 |                            | -13.8     | -947.8613888  | -2596.3535754 | -3135.1305286 | -409.0897049     | 0.0 | 0.0 | 0.0  | 0.0 |
|        |    |    |    | mol7e           | TMP2Zn_1 | 5_TMPZn_d5_mol7e          | TMPH_1 |                            | -13.8     | -947.8613888  | -2596.3535754 | -3135.1305078 | -409.0897049     | 0.0 | 0.0 | 0.1  | 0.0 |
|        |    |    |    | mol7e           | TMP2Zn_1 | 5_TMPZn_d5_mol7e_40       | TMPH_1 |                            | -2.4      | -947.8613888  | -2596.3535754 | -3135.1261629 | -409.0897049     | 0.0 | 0.0 | 11.5 | 0.0 |
|        |    |    |    | mol7e           | TMP2Zn_1 | 2_TMPZn_d2_mol7e          | TMPH_1 |                            | -1.3      | -947.8613888  | -2596.3535754 | -3135.125753  | -409.0897049     | 0.0 | 0.0 | 12.5 | 0.0 |
|        |    |    |    | mol7e           | TMP2Zn_1 | 5_TMPZn_d5_mol7e_38       | TMPH_1 |                            | 2.1       | -947.8613888  | -2596.3535754 | -3135.124442  | -409.0897049     | 0.0 | 0.0 | 16.0 | 0.0 |
|        |    |    |    | mol7e           | TMP2Zn_1 | 8_TMPZn_d8_mol7e          | TMPH_1 |                            | 0.5       | -947.8613888  | -2596.3535754 | -3135.125066  | -409.0897049     | 0.0 | 0.0 | 14.3 | 0.0 |
|        |    |    |    | mol7e           | TMP2Zn_1 | 5_TMPZn_d5_mol7e_1        | TMPH_1 |                            | 4.3       | -947.8613888  | -2596.3535754 | -3135.123615  | -409.0897049     | 0.0 | 0.0 | 18.2 | 0.0 |
|        |    |    |    | mol7e           | TMP2Zn_1 | mol15_pos5                | TMPH_1 |                            | -29.2     | -947.8613888  | -2596.3535754 | -3673.9080747 | -409.0897049     | 0.0 | 0.0 | 0.0  | 0.0 |
|        |    |    |    | mol7e           | TMP2Zn_1 | mol15_pos2                | TMPH_1 |                            | -8.1      | -947.8613888  | -2596.3535754 | -3673.9000425 | -409.0897049     | 0.0 | 0.0 | 21.1 | 0.0 |
|        |    |    |    | mol7e           | TMP2Zn_1 | mol15_pos8                | TMPH_1 |                            | -4.4      | -947.8613888  | -2596.3535754 | -3673.8986125 | -409.0897049     | 0.0 | 0.0 | 24.8 | 0.0 |
|        |    |    |    | mol16e_1        | TMPMgCl  | mol17_pos5_2              | TMPH_1 |                            | -10.0     | -1293.4670033 | -1068.9572254 | -1953.3411666 | -409.0868736     | 0.5 | 0.0 | 0.0  | 0.0 |
|        |    |    |    | mol16e_1        | TMPMgCl  | mol17_pos5_1              | TMPH_1 |                            | -9.9      | -1293.4670033 | -1068.9572254 | -1953.3411280 | -409.0868736     | 0.5 | 0.0 | 0.1  | 0.0 |
|        |    |    |    | mol16e_1        | TMPMgCl  | mol17_pos8_2              | TMPH_1 |                            | 19.3      | -1293.4670033 | -1068.9572254 | -1953.3299881 | -409.0868736     | 0.5 | 0.0 | 29.3 | 0.0 |
| 0      | 0  | 0  | 0  | 1_LiCl_mol6_1   | TMPMgCl  | 1_LiCl_8MgCl_d8_mol6      | TMPH_1 | reaction11                 | -45.8     | -1323.4874591 | -1068.9540091 | -1983.3747766 | -409.0841431     | 0.0 | 0.0 | 0.0  | 0.0 |
| 0      | 0  | 0  | 0  | 1_LiCl_mol6_1   | TMPZnCl  | 1_LiCl_2ZnCl_d2_mol6_aaq  | TMPH_1 | reaction12                 | -31.7     | -1323.4934114 | -2648.1661160 | -3562.5818963 | -409.0897049     | 0.0 | 0.0 | 0.0  | 0.0 |
| 0      | 0  | 0  | 0  | 1_LiCl_mol6_1   | TMP2Zn_1 | 1_LiCl_5TMPZn_d5_mol6_a   | TMPH_1 | reaction13                 | -14.5     | -1323.4934114 | -2596.3535754 | -3510.7628194 | -409.0897049     | 0.0 | 0.0 | 0.0  | 0.0 |
| 0      | 0  | 0  | 0  | 1_LiCl_mol6_1   | TMP2Zn_1 | 1_LiCl_mol14_pos2_5       | TMPH_1 | reaction14                 | -48.2     | -1323.4934114 | -2596.3535754 | -4425.1793560 | -409.0897049     | 0.0 | 0.0 | 0.0  | 0.0 |
| 0      | 0  | 0  | 0  | 1_LiCl_mol7e    | TMPZnCl  | 1_LiCl_2_ZnCl_d2_mol7e    | TMPH_1 | reaction15                 | -45.3     | -1415.7675211 | -2648.1661160 | -3654.8611981 | -409.0897049     | 0.0 | 0.0 | 0.0  | 0.0 |
| 0      | 0  | 0  | 0  | 1_LiCl_mol7e    | TMP2Zn_1 | 1_LiCl_5TMPZn_d5_mol7e_36 | TMPH_1 | reaction16                 | -16.2     | -1415.7675211 | -2596.3535754 | -3603.0375463 | -409.0897049     | 0.0 | 0.0 | 0.0  | 0.0 |
| 0      | 0  | 0  | 0  | 1_LiCl_mol7e    | TMP2Zn_1 | 1_LiCl_mol15_pos8_19      | TMPH_1 | reaction17                 | -77.9     | -1415.7675211 | -2596.3535754 | -4609.7388842 | -409.0897049     | 0.0 | 0.0 | 0.0  | 0.0 |
| 0      | 0  | 0  | 0  | 1_LiCl_mol16e_2 | TMPMgCl  | 1_LiCl_mol17_pos8_2       | TMPH_1 | reaction18                 | -58.1     | -1761.3705301 | -1068.9572254 | -2421.2630031 | -409.0868736     | 0.0 | 0.0 | 0.0  | 0.0 |
|        |    |    |    | 1_LiCl_mol6_1   | TMPMgCl  | 1_LiCl_8MgCl_d8_mol6      | TMPH_1 |                            | -45.8     | -1323.4874591 | -1068.9540091 | -1983.3747766 | -409.0841431     | 0.0 | 0.0 | 0.0  | 0.0 |
|        |    |    |    | 1_LiCl_mol6_1   | TMPMgCl  | 1_LiCl_3MgCl_d3_mol6      | TMPH_1 |                            | -7.2      | -1323.4874591 | -1068.9540091 | -1983.3600595 | -409.0841431     | 0.0 | 0.0 | 38.6 | 0.0 |
|        |    |    |    | 1_LiCl_mol6_1   | TMPMgCl  | 1_LiCl_5MgCl_d5_mol6      | TMPH_1 |                            | 7.6       | -1323.4874591 | -1068.9540091 | -1983.3544372 | -409.0841431     | 0.0 | 0.0 | 53.4 | 0.0 |

|   |   |   |   |                 |          |                           |        |            |  |       |               |               |               |              |     |     |      |     |
|---|---|---|---|-----------------|----------|---------------------------|--------|------------|--|-------|---------------|---------------|---------------|--------------|-----|-----|------|-----|
|   |   |   |   | 1_LiCl_mol6_1   | TMPMgCl  | 1_LiCl_2MgCl_d2_mol6      | TMPH_1 |            |  | 17.2  | -1323.4874591 | -1068.9540091 | -1983.3507799 | -409.0841431 | 0.0 | 0.0 | 63.0 | 0.0 |
|   |   |   |   | 1_LiCl_mol6_1   | TMPZnCl  | 1_LiCl_2ZnCl_d2_mol6_aaq  | TMPH_1 |            |  | -31.7 | -1323.4934114 | -2648.1661160 | -3562.5818963 | -409.0897049 | 0.0 | 0.0 | 0.0  | 0.0 |
|   |   |   |   | 1_LiCl_mol6_1   | TMPZnCl  | 1_LiCl_8ZnCl_d8_mol6_aac  | TMPH_1 |            |  | -30.8 | -1323.4934114 | -2648.1661160 | -3562.5815352 | -409.0897049 | 0.0 | 0.0 | 0.9  | 0.0 |
|   |   |   |   | 1_LiCl_mol6_1   | TMPZnCl  | 1_LiCl_3ZnCl_d3_mol6_aap  | TMPH_1 |            |  | -18.4 | -1323.4934114 | -2648.1661160 | -3562.5768378 | -409.0897049 | 0.0 | 0.0 | 13.3 | 0.0 |
|   |   |   |   | 1_LiCl_mol6_1   | TMPZnCl  | 1_LiCl_5ZnCl_d5_mol6_aae  | TMPH_1 |            |  | 1.2   | -1323.4934114 | -2648.1661160 | -3562.5693800 | -409.0897049 | 0.0 | 0.0 | 32.9 | 0.0 |
|   |   |   |   | 1_LiCl_mol6_1   | TMP2Zn_1 | 1_LiCl_5TMPZn_d5_mol6_a   | TMPH_1 |            |  | -14.5 | -1323.4934114 | -2596.3535754 | -3510.7628194 | -409.0897049 | 0.0 | 0.0 | 0.0  | 0.0 |
|   |   |   |   | 1_LiCl_mol6_1   | TMP2Zn_1 | 1_LiCl_5TMPZn_d5_mol6_b   | TMPH_1 |            |  | -12.7 | -1323.4934114 | -2596.3535754 | -3510.7621323 | -409.0897049 | 0.0 | 0.0 | 1.8  | 0.0 |
|   |   |   |   | 1_LiCl_mol6_1   | TMP2Zn_1 | 1_LiCl_3TMPZn_d3_mol6_a   | TMPH_1 |            |  | -11.5 | -1323.4934114 | -2596.3535754 | -3510.7616534 | -409.0897049 | 0.0 | 0.0 | 3.1  | 0.0 |
|   |   |   |   | 1_LiCl_mol6_1   | TMP2Zn_1 | 1_LiCl_3TMPZn_d3_mol6_b   | TMPH_1 |            |  | -10.8 | -1323.4934114 | -2596.3535754 | -3510.7614097 | -409.0897049 | 0.0 | 0.0 | 3.7  | 0.0 |
|   |   |   |   | 1_LiCl_mol6_1   | TMP2Zn_1 | 1_LiCl_2TMPZn_d2_mol6_c   | TMPH_1 |            |  | -7.0  | -1323.4934114 | -2596.3535754 | -3510.7599461 | -409.0897049 | 0.0 | 0.0 | 7.5  | 0.0 |
|   |   |   |   | 1_LiCl_mol6_1   | TMP2Zn_1 | 1_LiCl_8TMPZn_d8_mol6_c   | TMPH_1 |            |  | 1.7   | -1323.4934114 | -2596.3535754 | -3510.7566274 | -409.0897049 | 0.0 | 0.0 | 16.3 | 0.0 |
|   |   |   |   | 1_LiCl_mol6_1   | TMP2Zn_1 | 1_LiCl_mol14_pos2_5       | TMPH_1 |            |  | -48.2 | -1323.4934114 | -2596.3535754 | -4425.1793560 | -409.0897049 | 0.0 | 0.0 | 0.0  | 0.0 |
|   |   |   |   | 1_LiCl_mol6_1   | TMP2Zn_1 | 1_LiCl_mol14_pos8         | TMPH_1 |            |  | -46.7 | -1323.4934114 | -2596.3535754 | -4425.1787852 | -409.0897049 | 0.0 | 0.0 | 1.5  | 0.0 |
|   |   |   |   | 1_LiCl_mol6_1   | TMP2Zn_1 | 1_LiCl_mol14_pos2_8       | TMPH_1 |            |  | -36.8 | -1323.4934114 | -2596.3535754 | -4425.1750000 | -409.0897049 | 0.0 | 0.0 | 11.4 | 0.0 |
|   |   |   |   | 1_LiCl_mol6_1   | TMP2Zn_1 | 1_LiCl_mol14_pos2         | TMPH_1 |            |  | -34.5 | -1323.4934114 | -2596.3535754 | -4425.1741428 | -409.0897049 | 0.0 | 0.0 | 13.7 | 0.0 |
|   |   |   |   | 1_LiCl_mol6_1   | TMP2Zn_1 | 1_LiCl_mol14_pos3         | TMPH_1 |            |  | -26.8 | -1323.4934114 | -2596.3535754 | -4425.1712064 | -409.0897049 | 0.0 | 0.0 | 21.4 | 0.0 |
|   |   |   |   | 1_LiCl_mol6_1   | TMP2Zn_1 | 1_LiCl_mol14_pos5         | TMPH_1 |            |  | -26.0 | -1323.4934114 | -2596.3535754 | -4425.1708972 | -409.0897049 | 0.0 | 0.0 | 22.2 | 0.0 |
|   |   |   |   | 1_LiCl_mol7e    | TMPZnCl  | 1_LiCl_2_ZnCl_d2_mol7e    | TMPH_1 |            |  | -45.3 | -1415.7675211 | -2648.1661160 | -3654.8611981 | -409.0897049 | 0.0 | 0.0 | 0.0  | 0.0 |
|   |   |   |   | 1_LiCl_mol7e    | TMPZnCl  | 1_LiCl_8_ZnCl_d8_mol7e    | TMPH_1 |            |  | -35.6 | -1415.7675211 | -2648.1661160 | -3654.8574732 | -409.0897049 | 0.0 | 0.0 | 9.8  | 0.0 |
|   |   |   |   | 1_LiCl_mol7e    | TMPZnCl  | 1_LiCl_5_ZnCl_d5_mol7e    | TMPH_1 |            |  | -15.4 | -1415.7675211 | -2648.1661160 | -3654.8498060 | -409.0897049 | 0.0 | 0.0 | 29.9 | 0.0 |
|   |   |   |   | 1_LiCl_mol7e    | TMP2Zn_1 | 1_LiCl_5TMPZn_d5_mol7e_36 | TMPH_1 |            |  | -16.2 | -1415.7675211 | -2596.3535754 | -3603.0375463 | -409.0897049 | 0.0 | 0.0 | 0.0  | 0.0 |
|   |   |   |   | 1_LiCl_mol7e    | TMP2Zn_1 | 1_LiCl_2TMPZn_d2_mol7e    | TMPH_1 |            |  | -15.8 | -1415.7675211 | -2596.3535754 | -3603.0374059 | -409.0897049 | 0.0 | 0.0 | 0.4  | 0.0 |
|   |   |   |   | 1_LiCl_mol7e    | TMP2Zn_1 | 1_LiCl_5TMPZn_d5_mol7e    | TMPH_1 |            |  | -15.8 | -1415.7675211 | -2596.3535754 | -3603.0373973 | -409.0897049 | 0.0 | 0.0 | 0.4  | 0.0 |
|   |   |   |   | 1_LiCl_mol7e    | TMP2Zn_1 | 1_LiCl_2TMPZn_d2_mol7e_31 | TMPH_1 |            |  | -8.1  | -1415.7675211 | -2596.3535754 | -3603.0344814 | -409.0897049 | 0.0 | 0.0 | 8.0  | 0.0 |
|   |   |   |   | 1_LiCl_mol7e    | TMP2Zn_1 | 1_LiCl_2TMPZn_d2_mol7e_26 | TMPH_1 |            |  | -7.8  | -1415.7675211 | -2596.3535754 | -3603.0343516 | -409.0897049 | 0.0 | 0.0 | 8.4  | 0.0 |
|   |   |   |   | 1_LiCl_mol7e    | TMP2Zn_1 | 1_LiCl_2TMPZn_d2_mol7e_28 | TMPH_1 |            |  | -4.8  | -1415.7675211 | -2596.3535754 | -3603.0332274 | -409.0897049 | 0.0 | 0.0 | 11.3 | 0.0 |
|   |   |   |   | 1_LiCl_mol7e    | TMP2Zn_1 | 1_LiCl_5TMPZn_d5_mol7e_40 | TMPH_1 |            |  | -3.4  | -1415.7675211 | -2596.3535754 | -3603.0326870 | -409.0897049 | 0.0 | 0.0 | 12.8 | 0.0 |
|   |   |   |   | 1_LiCl_mol7e    | TMP2Zn_1 | 1_LiCl_5TMPZn_d5_mol7e_38 | TMPH_1 |            |  | 0.9   | -1415.7675211 | -2596.3535754 | -3603.0310626 | -409.0897049 | 0.0 | 0.0 | 17.0 | 0.0 |
|   |   |   |   | 1_LiCl_mol7e    | TMP2Zn_1 | 1_LiCl_5TMPZn_d5_mol7e_1  | TMPH_1 |            |  | 1.4   | -1415.7675211 | -2596.3535754 | -3603.0308558 | -409.0897049 | 0.0 | 0.0 | 17.6 | 0.0 |
|   |   |   |   | 1_LiCl_mol7e    | TMP2Zn_1 | 1_LiCl_8TMPZn_d8_mol7e_20 | TMPH_1 |            |  | 2.3   | -1415.7675211 | -2596.3535754 | -3603.0305200 | -409.0897049 | 0.0 | 0.0 | 18.4 | 0.0 |
|   |   |   |   | 1_LiCl_mol7e    | TMP2Zn_1 | 1_LiCl_mol15_pos8_19      | TMPH_1 |            |  | -77.9 | -1415.7675211 | -2596.3535754 | -4609.7388842 | -409.0897049 | 0.0 | 0.0 | 0.0  | 0.0 |
|   |   |   |   | 1_LiCl_mol7e    | TMP2Zn_1 | 1_LiCl_mol15_pos2_17      | TMPH_1 |            |  | -69.3 | -1415.7675211 | -2596.3535754 | -4609.7355987 | -409.0897049 | 0.0 | 0.0 | 8.6  | 0.0 |
|   |   |   |   | 1_LiCl_mol7e    | TMP2Zn_1 | 1_LiCl_mol15_pos2_15      | TMPH_1 |            |  | -67.1 | -1415.7675211 | -2596.3535754 | -4609.7347553 | -409.0897049 | 0.0 | 0.0 | 10.8 | 0.0 |
|   |   |   |   | 1_LiCl_mol7e    | TMP2Zn_1 | 1_LiCl_mol15_pos8         | TMPH_1 |            |  | -62.1 | -1415.7675211 | -2596.3535754 | -4609.7328651 | -409.0897049 | 0.0 | 0.0 | 15.8 | 0.0 |
|   |   |   |   | 1_LiCl_mol7e    | TMP2Zn_1 | 1_LiCl_mol15_pos2_12      | TMPH_1 |            |  | -55.6 | -1415.7675211 | -2596.3535754 | -4609.7303961 | -409.0897049 | 0.0 | 0.0 | 22.3 | 0.0 |
|   |   |   |   | 1_LiCl_mol7e    | TMP2Zn_1 | 1_LiCl_mol15_pos2_13      | TMPH_1 |            |  | -50.2 | -1415.7675211 | -2596.3535754 | -4609.7283395 | -409.0897049 | 0.0 | 0.0 | 27.7 | 0.0 |
|   |   |   |   | 1_LiCl_mol7e    | TMP2Zn_1 | 1_LiCl_mol15_pos5         | TMPH_1 |            |  | -31.3 | -1415.7675211 | -2596.3535754 | -4609.7211233 | -409.0897049 | 0.0 | 0.0 | 46.6 | 0.0 |
|   |   |   |   | 1_LiCl_mol16e_2 | TMPMgCl  | 1_LiCl_mol17_pos8_2       | TMPH_1 |            |  | -58.1 | -1761.3705301 | -1068.9572254 | -2421.2630031 | -409.0868736 | 0.0 | 0.0 | 0.0  | 0.0 |
|   |   |   |   | 1_LiCl_mol16e_2 | TMPMgCl  | 1_LiCl_mol17_pos8_1       | TMPH_1 |            |  | -57.6 | -1761.3705301 | -1068.9572254 | -2421.2628052 | -409.0868736 | 0.0 | 0.0 | 0.5  | 0.0 |
|   |   |   |   | 1_LiCl_mol16e_2 | TMPMgCl  | 1_LiCl_mol17_pos5_1       | TMPH_1 |            |  | -13.5 | -1761.3705301 | -1068.9572254 | -2421.2460049 | -409.0868736 | 0.0 | 0.0 | 44.6 | 0.0 |
| 0 | 0 | 0 | 0 | LiCl_mol6_aan   | TMPMgCl  | MgClLiCl_d5_mol6          | TMPH_1 | reaction21 |  | -47.0 | -1323.4872605 | -1068.9540091 | -1983.3750157 | -409.0841431 | 0.0 | 0.0 | 0.0  | 0.0 |
| 0 | 0 | 0 | 0 | LiCl_mol6_aan   | TMPZnCl  | LiCl_8ZnCl_d8_mol6_aac2   | TMPH_1 | reaction22 |  | -33.0 | -1323.4932126 | -2648.1661160 | -3562.5821902 | -409.0897049 | 0.0 | 0.0 | 0.0  | 0.0 |
| 0 | 0 | 0 | 0 | LiCl_mol6_aan   | TMP2Zn_1 | LiCl_3TMPZn_d3_mol6_a     | TMPH_1 | reaction23 |  | -24.8 | -1323.4932126 | -2596.3535754 | -3510.7665292 | -409.0897049 | 0.0 | 0.0 | 0.0  | 0.0 |
| 0 | 0 | 0 | 0 | LiCl_mol6_aan   | TMP2Zn_1 | LiCl_mol14_pos8           | TMPH_1 | reaction24 |  | -64.6 | -1323.4932126 | -2596.3535754 | -4425.1851790 | -409.0897049 | 0.0 | 0.0 | 0.0  | 0.0 |
| 0 | 0 | 0 | 0 | 1_LiCl_mol7e    | TMPZnCl  | 1_LiCl_2_ZnCl_d2_mol7e    | TMPH_1 | reaction25 |  | -45.3 | -1415.7675211 | -2648.1661160 | -3654.8611981 | -409.0897049 | 0.0 | 0.0 | 0.0  | 0.0 |
| 0 | 0 | 0 | 0 | 1_LiCl_mol7e    | TMP2Zn_1 | 1_LiCl_5TMPZn_d5_mol7e_36 | TMPH_1 | reaction26 |  | -16.2 | -1415.7675211 | -2596.3535754 | -3603.0375463 | -409.0897049 | 0.0 | 0.0 | 0.0  | 0.0 |
| 0 | 0 | 0 | 0 | 1_LiCl_mol7e    | TMP2Zn_1 | 1_LiCl_mol15_pos8_19      | TMPH_1 | reaction27 |  | -77.9 | -1415.7675211 | -2596.3535754 | -4609.7388842 | -409.0897049 | 0.0 | 0.0 | 0.0  | 0.0 |
| 0 | 0 | 0 | 0 | 1_LiCl_mol16e_2 | TMPMgCl  | LiCl_mol17_pos8_2         | TMPH_1 | reaction28 |  | -65.1 | -1761.3705301 | -1068.9572254 | -2421.2656716 | -409.0868736 | 0.0 | 0.0 | 0.0  | 0.0 |
|   |   |   |   | LiCl_mol6_aan   | TMPMgCl  | MgClLiCl_d5_mol6          | TMPH_1 |            |  | -47.0 | -1323.4872605 | -1068.9540091 | -1983.3750157 | -409.0841431 | 0.0 | 0.0 | 0.0  | 0.0 |
|   |   |   |   | LiCl_mol6_aan   | TMPMgCl  | 1_LiCl_8MgCl_d8_mol6      | TMPH_1 |            |  | -46.3 | -1323.4872605 | -1068.9540091 | -1983.3747766 | -409.0841431 | 0.0 | 0.0 | 0.6  | 0.0 |
|   |   |   |   | LiCl_mol6_aan   | TMPMgCl  | MgClLiCl_d3_mol6          | TMPH_1 |            |  | -42.4 | -1323.4872605 | -1068.9540091 | -1983.3732608 | -409.0841431 | 0.0 | 0.0 | 4.6  | 0.0 |
|   |   |   |   | LiCl_mol6_aan   | TMPMgCl  | MgClLiCl_d5_mol6_1        | TMPH_1 |            |  | -32.1 | -1323.4872605 | -1068.9540091 | -1983.3693651 | -409.0841431 | 0.0 | 0.0 | 14.8 | 0.0 |
|   |   |   |   | LiCl_mol6_aan   | TMPMgCl  | MgClLiCl_d8_mol6_1        | TMPH_1 |            |  | -24.0 | -1323.4872605 | -1068.9540091 | -1983.3662559 | -409.0841431 | 0.0 | 0.0 | 23.0 | 0.0 |
|   |   |   |   | LiCl_mol6_aan   | TMPMgCl  | MgClLiCl_d8_mol6          | TMPH_1 |            |  | -13.1 | -1323.4872605 | -1068.9540091 | -1983.3621014 | -409.0841431 | 0.0 | 0.0 | 33.9 | 0.0 |
|   |   |   |   | LiCl_mol6_aan   | TMPMgCl  | 1_LiCl_3MgCl_d3_mol6      | TMPH_1 |            |  | -7.7  | -1323.4872605 | -1068.9540091 | -1983.3600595 | -409.0841431 | 0.0 | 0.0 | 39.3 | 0.0 |
|   |   |   |   | LiCl_mol6_aan   | TMPMgCl  | MgClLiCl_d2_mol6          | TMPH_1 |            |  | 3.7   | -1323.4872605 | -1068.9540091 | -1983.3557106 | -409.0841431 | 0.0 | 0.0 | 50.7 | 0.0 |
|   |   |   |   | LiCl_mol6_aan   | TMPZnCl  | LiCl_8ZnCl_d8_mol6_aac2   | TMPH_1 |            |  | -33.0 | -1323.4932126 | -2648.1661160 | -3562.5821902 | -409.0897049 | 0.0 | 0.0 | 0.0  | 0.0 |
|   |   |   |   | LiCl_mol6_aan   | TMPZnCl  | 1_LiCl_2ZnCl_d2_mol6_aaq  | TMPH_1 |            |  | -32.2 | -1323.4932126 | -2648.1661160 | -3562.5818963 | -409.0897049 | 0.0 | 0.0 | 0.8  | 0.0 |
|   |   |   |   | LiCl_mol6_aan   | TMPZnCl  | 1_LiCl_8ZnCl_d8_mol6_aac  | TMPH_1 |            |  | -31.3 | -1323.4932126 | -2648.1661160 | -3562.5815352 | -409.0897049 | 0.0 | 0.0 | 1.7  | 0.0 |
|   |   |   |   | LiCl_mol6_aan   | TMPZnCl  | LiCl_3ZnCl_d3_mol6_aap    | TMPH_1 |            |  | -30.1 | -1323.4932126 | -2648.1661160 | -3562.5810755 | -409.0897049 | 0.0 | 0.0 | 2.9  | 0.0 |





|  |  |  |  |                |          |                            |        |  |  |       |               |               |               |              |     |     |       |     |
|--|--|--|--|----------------|----------|----------------------------|--------|--|--|-------|---------------|---------------|---------------|--------------|-----|-----|-------|-----|
|  |  |  |  | MgCl2_mol6_aac | TMPZnCl  | 1_MgCl2_8ZnCl_d8_mol6_aac2 | TMPH_1 |  |  | -10.7 | -1976.3904322 | -2648.1661160 | -4215.4709297 | -409.0897049 | 0.0 | 0.0 | 9.0   | 0.0 |
|  |  |  |  | MgCl2_mol6_aac | TMPZnCl  | MgCl2_8ZnCl_d8_mol6_aac23  | TMPH_1 |  |  | 5.1   | -1976.3904322 | -2648.1661160 | -4215.4648921 | -409.0897049 | 0.0 | 0.0 | 24.8  | 0.0 |
|  |  |  |  | MgCl2_mol6_aac | TMP2Zn_1 | 1_MgCl2_5TMPZn_d5_mol6_b   | TMPH_1 |  |  | -16.5 | -1976.3904322 | -2596.3535754 | -4163.6606032 | -409.0897049 | 0.0 | 0.0 | 0.0   | 0.0 |
|  |  |  |  | MgCl2_mol6_aac | TMP2Zn_1 | 1_MgCl2_5TMPZn_d5_mol6_a   | TMPH_1 |  |  | -16.1 | -1976.3904322 | -2596.3535754 | -4163.6604188 | -409.0897049 | 0.0 | 0.0 | 0.5   | 0.0 |
|  |  |  |  | MgCl2_mol6_aac | TMP2Zn_1 | 1_MgCl2_3TMPZn_d3_mol6_a   | TMPH_1 |  |  | -15.4 | -1976.3904322 | -2596.3535754 | -4163.6601613 | -409.0897049 | 0.0 | 0.0 | 1.2   | 0.0 |
|  |  |  |  | MgCl2_mol6_aac | TMP2Zn_1 | 1_MgCl2_3TMPZn_d3_mol6_b   | TMPH_1 |  |  | -14.9 | -1976.3904322 | -2596.3535754 | -4163.6599717 | -409.0897049 | 0.0 | 0.0 | 1.7   | 0.0 |
|  |  |  |  | MgCl2_mol6_aac | TMP2Zn_1 | MgCl2_3TMPZn_d3_mol6_a     | TMPH_1 |  |  | -9.4  | -1976.3904322 | -2596.3535754 | -4163.6579015 | -409.0897049 | 0.0 | 0.0 | 7.1   | 0.0 |
|  |  |  |  | MgCl2_mol6_aac | TMP2Zn_1 | MgCl2_5TMPZn_d5_mol6_aa    | TMPH_1 |  |  | -5.2  | -1976.3904322 | -2596.3535754 | -4163.6562712 | -409.0897049 | 0.0 | 0.0 | 11.4  | 0.0 |
|  |  |  |  | MgCl2_mol6_aac | TMP2Zn_1 | 1_MgCl2_2TMPZn_d2_mol6_c   | TMPH_1 |  |  | -2.5  | -1976.3904322 | -2596.3535754 | -4163.6552594 | -409.0897049 | 0.0 | 0.0 | 14.0  | 0.0 |
|  |  |  |  | MgCl2_mol6_aac | TMP2Zn_1 | 1_MgCl2_2TMPZn_d2_mol6_b   | TMPH_1 |  |  | 6.0   | -1976.3904322 | -2596.3535754 | -4163.6520280 | -409.0897049 | 0.0 | 0.0 | 22.5  | 0.0 |
|  |  |  |  | MgCl2_mol6_aac | TMP2Zn_1 | 1_MgCl2_8TMPZn_d8_mol6_a2  | TMPH_1 |  |  | 11.0  | -1976.3904322 | -2596.3535754 | -4163.6501179 | -409.0897049 | 0.0 | 0.0 | 27.5  | 0.0 |
|  |  |  |  | MgCl2_mol6_aac | TMP2Zn_1 | 1_MgCl2_mol14_pos2_27      | TMPH_1 |  |  | -51.1 | -1976.3904322 | -2596.3535754 | -5730.9744961 | -409.0897049 | 0.0 | 0.0 | 0.0   | 0.0 |
|  |  |  |  | MgCl2_mol6_aac | TMP2Zn_1 | 1_MgCl2_mol14_pos3         | TMPH_1 |  |  | -32.3 | -1976.3904322 | -2596.3535754 | -5730.9673478 | -409.0897049 | 0.0 | 0.0 | 18.8  | 0.0 |
|  |  |  |  | MgCl2_mol6_aac | TMP2Zn_1 | 1_MgCl2_mol14_pos5         | TMPH_1 |  |  | -28.9 | -1976.3904322 | -2596.3535754 | -5730.9660501 | -409.0897049 | 0.0 | 0.0 | 22.2  | 0.0 |
|  |  |  |  | MgCl2_mol6_aac | TMP2Zn_1 | 1_MgCl2_mol14_pos2         | TMPH_1 |  |  | -22.1 | -1976.3904322 | -2596.3535754 | -5730.9634570 | -409.0897049 | 0.0 | 0.0 | 29.0  | 0.0 |
|  |  |  |  | MgCl2_mol6_aac | TMP2Zn_1 | 1_MgCl2_mol14_pos8         | TMPH_1 |  |  | -4.2  | -1976.3904322 | -2596.3535754 | -5730.9566256 | -409.0897049 | 0.0 | 0.0 | 46.9  | 0.0 |
|  |  |  |  | MgCl2_mol6_aac | TMP2Zn_1 | 1_MgCl2_mol14_pos5_29      | TMPH_1 |  |  | -1.4  | -1976.3904322 | -2596.3535754 | -5730.9555538 | -409.0897049 | 0.0 | 0.0 | 49.7  | 0.0 |
|  |  |  |  | MgCl2_mol6_aac | TMP2Zn_1 | 1_MgCl2_mol14_pos8_1       | TMPH_1 |  |  | 8.7   | -1976.3904322 | -2596.3535754 | -5730.9517140 | -409.0897049 | 0.0 | 0.0 | 58.8  | 0.0 |
|  |  |  |  | MgCl2_mol6_aac | TMP2Zn_1 | 1_MgCl2_mol14_pos5_31      | TMPH_1 |  |  | 19.2  | -1976.3904322 | -2596.3535754 | -5730.9477235 | -409.0897049 | 0.0 | 0.0 | 70.3  | 0.0 |
|  |  |  |  | 1_MgCl2_mol7e  | TMP2Zn_1 | 1_MgCl2_mol15_pos2_7       | TMPH_1 |  |  | -77.8 | -2068.6621074 | -2596.3535754 | -5915.5280204 | -409.0897049 | 0.0 | 0.0 | 0.0   | 0.0 |
|  |  |  |  | 1_MgCl2_mol7e  | TMP2Zn_1 | 1_MgCl2_mol15_pos2         | TMPH_1 |  |  | -60.0 | -2068.6621074 | -2596.3535754 | -5915.5212210 | -409.0897049 | 0.0 | 0.0 | 17.9  | 0.0 |
|  |  |  |  | 1_MgCl2_mol7e  | TMP2Zn_1 | 1_MgCl2_mol15_pos5         | TMPH_1 |  |  | -32.4 | -2068.6621074 | -2596.3535754 | -5915.5107372 | -409.0897049 | 0.0 | 0.0 | 45.4  | 0.0 |
|  |  |  |  | 1_MgCl2_mol7e  | TMP2Zn_1 | 1_MgCl2_mol15_pos2_9       | TMPH_1 |  |  | -21.6 | -2068.6621074 | -2596.3535754 | -5915.5065916 | -409.0897049 | 0.0 | 0.0 | 56.3  | 0.0 |
|  |  |  |  | 1_MgCl2_mol7e  | TMP2Zn_1 | 1_MgCl2_mol15_pos8         | TMPH_1 |  |  | -10.4 | -2068.6621074 | -2596.3535754 | -5915.5023517 | -409.0897049 | 0.0 | 0.0 | 67.4  | 0.0 |
|  |  |  |  | 1_MgCl2_mol7e  | TMP2Zn_1 | 1_MgCl2_mol15_pos2_5       | TMPH_1 |  |  | 5.5   | -2068.6621074 | -2596.3535754 | -5915.4963040 | -409.0897049 | 0.0 | 0.0 | 83.3  | 0.0 |
|  |  |  |  | 1_MgCl2_mol7e  | TMP2Zn_1 | 1_MgCl2_mol15_pos2_8       | TMPH_1 |  |  | 38.9  | -2068.6621074 | -2596.3535754 | -5915.4835522 | -409.0897049 | 0.0 | 0.0 | 116.8 | 0.0 |
|  |  |  |  | 1_MgCl2_mol7e  | TMP2Zn_1 | 1_MgCl2_mol15_pos5_10      | TMPH_1 |  |  | 83.6  | -2068.6621074 | -2596.3535754 | -5915.4665253 | -409.0897049 | 0.0 | 0.0 | 161.5 | 0.0 |



























|        |          |                           |                      |           |           |           |           |                                                                  |                           |                          |                       |                      |  |
|--------|----------|---------------------------|----------------------|-----------|-----------|-----------|-----------|------------------------------------------------------------------|---------------------------|--------------------------|-----------------------|----------------------|--|
| 0      | 11       | TS5_TPMgCLiCl_mol6_acn_s2 | -2392.374327         |           |           |           |           |                                                                  | -1330.33                  |                          |                       |                      |  |
| 0      | 12       | TS3_TPMgCLiCl_mol6_1_s1   | -2392.368185         |           |           |           |           |                                                                  | -1349.24                  |                          |                       |                      |  |
| 0      | 13       | TS3_TPMgCLiCl_mol6_acb_s1 | -2392.364667         |           |           |           |           |                                                                  | -1372.01                  |                          |                       |                      |  |
| 0      | 14       | TS3_TPMgCLiCl_mol6_1_s2   | -2392.362846         |           |           |           |           |                                                                  | -1283.75                  |                          |                       |                      |  |
| 0      | 15       | TS2_TPMgCLiCl_mol6_aai_s3 | -2392.360684         |           |           |           |           |                                                                  | -1199.87                  |                          |                       |                      |  |
| Charge | N° conf. | Filename                  | (U)B3LYP-D3/6-31G(d) |           |           |           |           | CPCM(DMSO)/(U)B3LYP-D3/6-31++G(2df,2p)//<br>(U)B3LYP-D3/6-31G(d) |                           |                          |                       |                      |  |
|        |          |                           |                      | 298.15 K  | 253.15 K  | 233.15 K  | 213.15 K  | 298.15K                                                          |                           |                          | 298.15K               | 298.15K              |  |
|        |          |                           | E <sub>tot gas</sub> | qh-δG.1   | qh-δG.1   | qh-δG.1   | qh-δG.1   | 1 <sup>st</sup> freq.                                            | E <sub>tot sol</sub> DMSO | E <sub>tot sol</sub> THF | G <sub>sol</sub> DMSO | G <sub>sol</sub> THF |  |
| 0      | 1        | TS8_TPMgCLiCl_mol16e_aav1 | -2830.198445         | 0.3927433 | 0.4069398 | 0.4128151 | 0.4184183 | -1310.78                                                         | -2830.76219               |                          | -2830.369447          |                      |  |
| 0      | 2        | TS8_TPMgCLiCl_mol16e_aav2 | -2830.198327         | 0.3928343 | 0.4070194 | 0.4128895 | 0.4184877 | -1311.39                                                         | -2830.762445              |                          | -2830.369611          |                      |  |
| 0      | 3        | TS8_TPMgCLiCl_mol16e_abz2 | -2830.190355         | 0.3928005 | 0.4069829 | 0.4128506 | 0.4184454 | -1218.26                                                         | -2830.74575               |                          | -2830.35295           |                      |  |
| 0      | 4        | TS8_TPMgCLiCl_mol16e_abz1 | -2830.190205         | 0.3932347 | 0.4073633 | 0.4132077 | 0.4187796 | -1213.13                                                         | -2830.746394              |                          | -2830.353159          |                      |  |
| 0      | 5        | TS5_TPMgCLiCl_mol16e_acn1 | -2830.180722         | 0.3939525 | 0.4079845 | 0.4137828 | 0.4193065 | -1439.74                                                         | -2830.749381              |                          | -2830.355429          |                      |  |
| 0      | 6        | TS5_TPMgCLiCl_mol16e_acn2 | -2830.180518         | 0.3939695 | 0.4080053 | 0.4138055 | 0.4193314 | -1432.71                                                         | -2830.749858              |                          | -2830.355888          |                      |  |
